# Supplementary material for: Transcriptional inhibition after irradiation occurs preferentially at highly expressed genes in a manner dependent on cell cycle progression
Source: bioRxiv preprint, doi:10.1101/2023.11.20.567799, version 2 (2024-06-11)
Supplement: Supplementary file 1 [file 567799_file03.xlsx]

## Sheet: SupplementaryTable2
Supplementary table 2: Nascent RNA profiles of each gene using EU RNA-seq.
Ensembl ID	Gene name	log2 Fold change	P value	P adjusted value	Normalized read counts in -IR replicate 1	Normalized read counts in -IR replicate 2	Normalized read counts in +IR replicate 1	Normalized read counts in +IR replicate 2
ENSMUSG00000000001	Gnai3	0.117738	2.55e-05	5.56e-05	2274.63	2416.86	2297.9	2792.52
ENSMUSG00000000028	Cdc45	0.565359	3.97e-74	2.34e-73	1664.88	1633.69	2325.97	2555.11
ENSMUSG00000000037	Scml2	12.4163	0	0	0	0	9.08259	1.84751
ENSMUSG00000000049	Apoh	0.935416	0.0537495	0.0769345	9.52723	0	9.90828	8.31381
ENSMUSG00000000056	Narf	-0.326866	1.53e-11	4.6e-11	883.651	974.348	578.809	902.51
ENSMUSG00000000078	Klf6	2.37681	0	0	774.087	927.64	4083.04	4755.5
ENSMUSG00000000085	Scmh1	0.441069	2.31e-33	1.06e-32	1381.45	1116.64	1615.05	1776.38
ENSMUSG00000000088	Cox5a	0.0872058	0.0306839	0.0460198	1087.3	776.654	1069.27	910.824
ENSMUSG00000000093	Tbx2	2.18993	9.12e-05	0.000189398	0	4.34492	4.12845	15.7039
ENSMUSG00000000120	Ngfr	-0.472057	0.368766	0.411224	3.57271	0	1.65138	0.923757
ENSMUSG00000000125	Wnt3	1.79224	0.024737	0.0377326	0	2.17246	6.60552	0.923757
ENSMUSG00000000131	Xpo6	0.289445	6.12e-39	2.96e-38	3835.9	3503.09	4395.98	4573.52
ENSMUSG00000000134	Tfe3	1.5451	3.19e-154	2.19e-153	322.735	256.35	805.874	884.035
ENSMUSG00000000142	Axin2	1.89635	1.88e-191	1.34e-190	206.026	195.521	760.461	734.387
ENSMUSG00000000148	Brat1	-0.782602	9.4e-17	3.31e-16	271.526	275.902	175.046	143.182
ENSMUSG00000000149	Gna12	-0.14409	0.00706734	0.0118472	632.37	619.151	544.13	588.433
ENSMUSG00000000157	Itgb2l	0.108519	0.568705	0.586964	4.76361	3.25869	4.95414	3.69503
ENSMUSG00000000159	Igsf5	-0.0429772	0.475764	0.502982	4.76361	24.9833	5.77983	23.0939
ENSMUSG00000000167	Pih1d2	0.490611	0.148566	0.190212	14.2908	4.34492	20.6423	5.54254
ENSMUSG00000000168	Dlat	0.130776	0.00660565	0.0111178	755.033	660.427	686.974	862.789
ENSMUSG00000000171	Sdhd	0.0804228	0.0080799	0.0134068	1882.82	1728.19	1803.31	2014.71
ENSMUSG00000000182	Fgf23	9.85293	0	0	0	0	0	1.84751
ENSMUSG00000000184	Ccnd2	1.32284	0	0	7888.55	9912.93	20033.7	24498
ENSMUSG00000000194	Gpr107	-0.125395	0.00525983	0.00895996	914.614	862.466	749.727	879.417
ENSMUSG00000000197	Nalcn	9.85293	0	0	0	0	0	1.84751
ENSMUSG00000000202	Btbd17	8.69295	1	1	0	0	0.82569	0
ENSMUSG00000000204	Slfn4	-0.792781	0.00222968	0.00399245	27.3908	35.8456	11.5597	24.9414
ENSMUSG00000000223	Drp2	-0.0614224	0.426449	0.460917	38.1089	21.7246	30.5505	26.7889
ENSMUSG00000000244	Tspan32	-0.718506	1.39e-48	7.23e-48	1152.79	862.466	561.469	663.257
ENSMUSG00000000247	Lhx2	0.711028	4.59e-31	2.06e-30	377.516	405.164	606.882	674.343
ENSMUSG00000000248	Clec2g	3.06973	3.34e-81	2.01e-80	25.009	9.77606	123.028	169.048
ENSMUSG00000000253	Gmpr	2.59873	0.000137891	0.000282051	0	2.17246	5.77983	7.39006
ENSMUSG00000000263	Glra1	-1.46132	0.338235	0.383708	1.1909	1.08623	0.82569	0
ENSMUSG00000000275	Trim25	-0.213153	7.36e-15	2.45e-14	2840.31	2844.83	2216.15	2688.13
ENSMUSG00000000276	Dgke	-0.414088	1.7e-21	6.64e-21	1223.06	1167.7	852.938	941.308
ENSMUSG00000000278	Scpep1	0.108356	0.0134938	0.0215847	819.342	867.897	809.177	1009.67
ENSMUSG00000000282	Mnt	1.38173	0	0	1200.43	1174.21	2857.71	3330.14
ENSMUSG00000000290	Itgb2	0.00993526	0.435799	0.46931	766.942	761.447	754.681	784.27
ENSMUSG00000000295	Hddc2	-0.124396	0.0317499	0.0474685	488.271	469.251	412.845	465.573
ENSMUSG00000000301	Pemt	0.566858	0.000439221	0.000853531	63.1179	48.8803	80.9176	84.9856
ENSMUSG00000000317	Bcl6b	1.85174	0.000696794	0.00132322	2.38181	3.25869	7.43121	12.9326
ENSMUSG00000000318	Clec10a	8.85449	1	1	0	0	0	0.923757
ENSMUSG00000000320	Alox12	-0.610955	0.107646	0.142904	9.52723	9.77606	2.47707	10.1613
ENSMUSG00000000325	Arvcf	0.0741227	0.247291	0.296374	185.781	157.503	146.147	215.235
ENSMUSG00000000326	Comt	-0.0526092	0.173291	0.218282	702.633	652.824	631.653	675.266
ENSMUSG00000000339	Rtca	-0.0387084	0.195689	0.242906	1098.01	991.727	907.434	1126.98
ENSMUSG00000000340	Dbt	0.161405	0.000558623	0.00107183	795.524	783.171	791.011	974.564
ENSMUSG00000000346	Dazap2	0.210853	1.44e-22	5.71e-22	4053.84	3937.58	4258.91	4990.13
ENSMUSG00000000355	Mcts1	-0.0453677	0.207666	0.255206	706.206	689.756	603.58	749.167
ENSMUSG00000000365	Rnf17	-0.986403	0.218283	0.266383	2.38181	1.08623	0.82569	0.923757
ENSMUSG00000000374	Trappc10	0.277956	3.26e-17	1.16e-16	1624.39	1688	1799.18	2217.02
ENSMUSG00000000378	Ccm2	-0.292396	4.99e-15	1.67e-14	1669.65	1458.81	1264.96	1289.56
ENSMUSG00000000381	Wap	13.0751	0	0	0	0	2.47707	14.7801
ENSMUSG00000000384	Tbrg4	0.666478	5.12e-141	3.46e-140	2303.21	2063.84	3333.31	3598.03
ENSMUSG00000000385	Tmprss2	1.20428	0.0811002	0.111587	2.38181	2.17246	4.95414	5.54254
ENSMUSG00000000399	Ndufa9	-0.00151488	0.488392	0.51399	1421.94	1286.1	1264.13	1441.06
ENSMUSG00000000402	Egfl6	0.198542	0.399559	0.43845	10.7181	3.25869	4.95414	11.0851
ENSMUSG00000000409	Lck	-0.0527526	0.30243	0.351051	252.472	197.694	211.377	222.625
ENSMUSG00000000411	Tssk3	2.08333	1.65e-06	3.91e-06	7.14542	1.08623	17.3395	17.5514
ENSMUSG00000000420	Galnt1	0.0606544	0.0210414	0.0325755	2232.94	2338.65	2182.3	2585.6
ENSMUSG00000000439	Mkrn2	-0.0692747	0.209142	0.256741	292.962	298.713	284.037	279.898
ENSMUSG00000000441	Raf1	0.487288	9.65e-29	4.21e-28	894.369	814.672	1155.14	1240.61
ENSMUSG00000000486	2022-09-01	-0.0820106	0.016037	0.0253392	1592.24	1333.89	1340.92	1423.51
ENSMUSG00000000530	Acvrl1	-1.2845	0.0399421	0.0586223	3.57271	5.43115	0	3.69503
ENSMUSG00000000531	Grasp	0.680058	6.27e-09	1.7e-08	115.518	101.019	151.101	195.836
ENSMUSG00000000532	Acvr1b	0.0796158	0.125238	0.163136	434.68	442.095	443.396	483.125
ENSMUSG00000000538	Tom1l2	0.227378	0.00144481	0.00264914	342.98	298.713	410.368	340.866
ENSMUSG00000000552	Zfp385a	-0.179465	0.00518771	0.00884414	458.498	426.888	355.047	426.776
ENSMUSG00000000555	Itga5	2.46963	0.0226684	0.0348383	1.1909	0	6.60552	0
ENSMUSG00000000560	Gabra2	0.232842	0.571696	0.589924	5.95452	0	3.30276	3.69503
ENSMUSG00000000561	Wdr77	0.520359	4.1e-43	2.04e-42	1181.38	1087.32	1543.22	1710.8
ENSMUSG00000000562	Adora3	-12.5448	0	0	0	11.9485	0	0
ENSMUSG00000000563	Atp5f1	-0.0221857	0.204029	0.251298	3040.38	2867.65	2861.84	2956.02
ENSMUSG00000000568	Hnrnpd	0.108103	3.88e-14	1.27e-13	10252.5	8712.65	9862.87	10577.9
ENSMUSG00000000579	Dynlt1c	0.0216835	0.460727	0.489692	89.3178	78.2085	53.6699	116.393
ENSMUSG00000000581	C1d	0.0350868	0.307486	0.35605	452.543	380.18	422.753	430.471
ENSMUSG00000000594	Gm2a	-0.34529	2.97e-14	9.73e-14	1158.75	984.124	793.488	893.273
ENSMUSG00000000600	Krit1	0.162667	6.85e-07	1.66e-06	1675.6	1723.85	1802.48	2002.7
ENSMUSG00000000605	Clcn4	0.36519	2.41e-18	8.82e-18	1006.31	966.744	1212.11	1329.29
ENSMUSG00000000617	Grm6	9.85293	0	0	0	0	0	1.84751
ENSMUSG00000000628	Hk2	0.778836	1.59e-274	1.18e-273	2862.93	3083.81	4890.56	5312.53
ENSMUSG00000000631	Myo18a	-0.184996	4.5e-06	1.03e-05	1393.36	1110.13	1011.47	1190.72
ENSMUSG00000000632	Sez6	-1.10288	0.163042	0.206694	5.95452	0	0	2.77127
ENSMUSG00000000673	Haao	-0.647376	6.05e-10	1.71e-09	254.853	168.366	120.551	149.649
ENSMUSG00000000682	Cd52	-0.0299313	0.259206	0.307989	933.669	1088.4	855.415	1125.14
ENSMUSG00000000686	Abhd15	-1.05668	3e-27	1.28e-26	306.062	237.884	123.854	137.64
ENSMUSG00000000693	Loxl3	1.21054	3.56e-10	1.01e-09	28.5817	31.5007	50.3671	88.6807
ENSMUSG00000000706	Btn1a1	-0.470026	0.15334	0.1957	7.14542	14.121	10.734	4.61878
ENSMUSG00000000708	Kat2b	0.00676925	0.463127	0.49173	697.87	576.788	596.148	684.504
ENSMUSG00000000711	Rab5b	-0.410478	7.47e-13	2.34e-12	760.987	594.167	437.616	581.967
ENSMUSG00000000724	Cryba1	1.09439	7.62e-06	1.73e-05	26.1999	13.0348	41.2845	42.4928
ENSMUSG00000000730	Dnmt3l	12.3169	0	0	0	0	7.43121	2.77127
ENSMUSG00000000731	Aire	10.8522	0	0	0	0	0	3.69503
ENSMUSG00000000732	Icosl	1.26202	9.09e-14	2.92e-13	52.3998	26.0695	103.211	84.9856
ENSMUSG00000000738	Spg7	-0.11076	0.00831192	0.013774	1000.36	1017.8	861.195	1007.82
ENSMUSG00000000739	Sult5a1	10.2756	0	0	0	0	2.47707	0
ENSMUSG00000000740	Rpl13	-0.0920513	6.07e-16	2.09e-15	16831	15331	14727	15447.1
ENSMUSG00000000743	Chmp1a	-0.169158	0.00105641	0.00196924	753.842	671.29	567.249	700.208
ENSMUSG00000000751	Rpa1	-0.14943	7.32e-11	2.15e-10	4130.05	3797.46	3387.81	3759.69
ENSMUSG00000000753	Serpinf1	-0.00911297	0.51128	0.533269	59.5452	63.0013	63.5782	58.1967
ENSMUSG00000000759	Tubgcp3	0.465686	2.65e-48	1.37e-47	1669.65	1603.27	2108.81	2411.01
ENSMUSG00000000766	Oprm1	-1.49529	0.00400108	0.00692289	8.33633	11.9485	1.65138	5.54254
ENSMUSG00000000776	Polr3d	0.867185	2.74e-77	1.63e-76	701.442	565.926	1177.43	1134.37
ENSMUSG00000000782	Tcf7	0.410164	0.00770544	0.0128264	69.0724	54.3115	81.7433	82.2144
ENSMUSG00000000787	Ddx3x	0.422987	8.06e-277	5.98e-276	11755.4	12348.3	15345.5	16970.3
ENSMUSG00000000791	Il12rb1	1.25162	0.00201582	0.00363112	5.95452	6.51738	6.60552	23.0939
ENSMUSG00000000792	Slc5a5	0.668483	0.00482524	0.00826424	19.0545	30.4144	37.9818	40.6453
ENSMUSG00000000794	Kcnn3	8.69295	1	1	0	0	0.82569	0
ENSMUSG00000000804	Usp32	0.237792	1.14e-07	2.9e-07	903.896	872.242	970.186	1124.21
ENSMUSG00000000811	Txnrd3	-0.260193	8.58e-26	3.59e-25	3664.41	3458.55	2789.18	3158.32
ENSMUSG00000000817	Fasl	11.5689	0	0	0	0	3.30276	2.77127
ENSMUSG00000000823	Zfp512b	0.194016	1.86e-06	4.39e-06	1165.89	1003.68	1137.8	1344.07
ENSMUSG00000000826	Dnajc5	0.386644	2.6e-61	1.44e-60	3238.07	3075.12	3719.73	4533.8
ENSMUSG00000000827	Tpd52l2	0.234793	6.95e-07	1.69e-06	856.26	727.774	825.69	1038.3
ENSMUSG00000000838	Fmr1	0.0826736	0.000172408	0.000348984	3885.92	3622.57	3751.94	4199.4
ENSMUSG00000000861	Bcl11a	-0.322385	2.51e-76	1.49e-75	8030.26	6645.55	5742.68	5994.26
ENSMUSG00000000869	Il4	0.166333	0.397692	0.43699	17.8636	7.60361	8.2569	20.3227
ENSMUSG00000000876	Pxmp4	-0.397896	9.55e-05	0.000198083	183.399	222.677	142.844	165.352
ENSMUSG00000000881	Dlg3	0.45303	0.0704322	0.0982927	7.14542	35.8456	25.5964	33.2552
ENSMUSG00000000884	Gnb1l	-0.0474807	0.365278	0.409227	128.618	82.5534	107.34	96.9945
ENSMUSG00000000901	Mmp11	-0.577576	1.92e-11	5.73e-11	320.353	308.489	193.212	228.168
ENSMUSG00000000902	Smarcb1	-0.280593	1e-14	3.33e-14	1738.72	1573.95	1320.28	1406.88
ENSMUSG00000000903	Vpreb3	-0.149732	9.38e-12	2.83e-11	4267.01	4404.66	3329.18	4487.61
ENSMUSG00000000915	Hip1r	0.355395	2.13e-22	8.43e-22	1267.12	1346.92	1452.39	1891.85
ENSMUSG00000000916	Nsun5	0.162365	0.0192968	0.030029	345.362	281.333	317.065	384.283
ENSMUSG00000000934	Top1mt	0.258849	0.0267838	0.040607	125.045	83.6397	106.514	143.182
ENSMUSG00000000948	Gm38393	10.8522	0	0	0	0	0	3.69503
ENSMUSG00000000957	Mmp14	-0.37313	0.0144467	0.0230058	67.8815	98.8469	59.4497	69.2818
ENSMUSG00000000958	Slc7a7	-0.475102	2.93e-06	6.81e-06	188.163	237.884	133.762	172.743
ENSMUSG00000000959	Oxa1l	-0.128594	0.000770016	0.00145652	1221.87	1379.51	1027.16	1352.38
ENSMUSG00000000976	Heatr6	0.268882	3.6e-11	1.07e-10	1084.91	1074.28	1195.6	1405.96
ENSMUSG00000000982	Ccl3	3.52675	2.24e-05	4.92e-05	0	1.08623	3.30276	9.23757
ENSMUSG00000001016	Ilf2	0.0593399	0.0140992	0.0224915	2833.16	2693.85	2719	3040.08
ENSMUSG00000001017	Chtop	0.345577	6.91e-53	3.68e-52	3595.34	3322.78	4261.39	4529.18
ENSMUSG00000001018	Snapin	-0.271292	2.47e-06	5.76e-06	627.606	636.53	444.221	603.213
ENSMUSG00000001020	S100a4	11.4973	0	0	0	0	5.77983	0
ENSMUSG00000001021	S100a3	-11.0858	0	0	0	4.34492	0	0
ENSMUSG00000001025	S100a6	-0.83197	0.0177814	0.0279031	32.1544	4.34492	14.0367	6.4663
ENSMUSG00000001027	Scn4a	0.931724	2.93e-13	9.26e-13	86.936	76.0361	182.478	128.402
ENSMUSG00000001029	Icam2	-0.43978	5.41e-08	1.4e-07	310.826	360.628	203.12	291.907
ENSMUSG00000001034	Mapk7	0.691962	5.52e-38	2.64e-37	560.916	472.51	767.892	901.587
ENSMUSG00000001036	Epn2	-1.07431	0.0684812	0.0958409	4.76361	4.34492	2.47707	1.84751
ENSMUSG00000001039	B9d1	-0.155013	0.270673	0.320172	34.5362	41.2767	25.5964	42.4928
ENSMUSG00000001052	Sec24b	0.0599381	0.0422555	0.0617213	1829.23	1592.41	1530.83	2035.96
ENSMUSG00000001053	N4bp3	-0.0321235	0.323455	0.371625	533.525	429.061	403.763	537.627
ENSMUSG00000001054	Rmnd5b	0.24459	1.17e-06	2.81e-06	710.97	674.548	886.791	754.709
ENSMUSG00000001056	Nhp2	0.129841	3.13e-06	7.26e-06	2503.28	2268.05	2593.49	2627.16
ENSMUSG00000001062	Vps9d1	0.173392	0.0501118	0.0722378	221.508	144.469	203.946	208.769
ENSMUSG00000001065	Zfp276	0.39204	2.62e-09	7.22e-09	375.135	397.56	461.561	552.407
ENSMUSG00000001076	C1ql4	0.066543	0.540721	0.560792	9.52723	4.34492	9.90828	4.61878
ENSMUSG00000001082	Mfsd10	0.411145	9.89e-13	3.08e-12	514.47	496.407	636.607	707.598
ENSMUSG00000001089	Luzp1	0.418694	3.74e-15	1.26e-14	603.788	577.874	801.745	777.803
ENSMUSG00000001098	Kctd10	0.396107	1.5e-12	4.63e-12	484.698	596.34	668.809	753.786
ENSMUSG00000001100	Poldip2	0.0061903	0.456489	0.485832	977.732	807.068	922.296	870.179
ENSMUSG00000001103	Sebox	0.369757	0.273209	0.322835	7.14542	8.68984	6.60552	13.8564
ENSMUSG00000001105	Ift20	-0.0485949	0.2579	0.306873	453.734	393.215	377.34	441.556
ENSMUSG00000001120	Pcbp3	-1.97801	0.0650289	0.0915214	0	3.25869	0.82569	0
ENSMUSG00000001123	Lgals9	-0.126975	3.23e-12	9.91e-12	6446.36	6097.01	5369.46	6117.12
ENSMUSG00000001127	Araf	0.0469733	0.117445	0.154655	1344.53	1307.82	1234.41	1505.72
ENSMUSG00000001128	Cfp	-0.0347062	0.433587	0.467196	82.1724	59.7426	70.1837	68.358
ENSMUSG00000001131	Timp1	12.6959	0	0	0	0	4.95414	8.31381
ENSMUSG00000001134	Uxt	0.254405	0.00644017	0.0108563	216.744	140.124	211.377	214.312
ENSMUSG00000001138	Cnnm3	-0.103084	0.0583806	0.0830816	489.461	506.183	416.148	510.838
ENSMUSG00000001143	Lman2l	-0.212876	0.000418185	0.000814625	565.679	526.821	478.9	463.726
ENSMUSG00000001150	Mcm3ap	-0.00734817	0.399518	0.43845	2585.45	2534.17	2449.82	2643.79
ENSMUSG00000001151	Pcnt	0.271417	3.19e-53	1.7e-52	5663.94	6025.31	6764.05	7344.79
ENSMUSG00000001156	Mxd1	2.51915	0	0	202.454	182.487	966.058	1240.61
ENSMUSG00000001157	Gmcl1	-0.181126	0.000670314	0.00127558	696.679	662.6	568.901	630.002
ENSMUSG00000001158	Snrnp27	-0.155883	0.00400236	0.00692448	719.306	530.08	497.891	623.536
ENSMUSG00000001166	Oas1c	-0.823892	4.16e-05	8.9e-05	75.0269	43.4492	19.8166	47.1116
ENSMUSG00000001173	Ocrl	-0.365132	9.18e-05	0.000190696	233.417	246.574	144.496	228.168
ENSMUSG00000001175	Calm1	0.030935	0.0389421	0.057255	6994.18	6405.49	6323.14	7366.96
ENSMUSG00000001211	Agpat3	-0.38037	4.22e-09	1.15e-08	543.052	500.752	364.955	436.937
ENSMUSG00000001225	Slc26a3	-2.10574	0.00187761	0.00339295	5.95452	8.68984	2.47707	0.923757
ENSMUSG00000001227	Sema6b	-1.45121	2.64e-05	5.76e-05	20.2454	22.8108	7.43121	8.31381
ENSMUSG00000001228	Uhrf1	0.793119	0	0	7849.25	6970.33	11914.7	13764.9
ENSMUSG00000001229	Dpp9	0.122404	0.000239324	0.000477755	1672.03	1548.96	1636.52	1869.68
ENSMUSG00000001240	Ramp2	-9.22026	0	0	1.1909	0	0	0
ENSMUSG00000001247	Lsr	-0.152232	0.366674	0.410576	7.14542	16.2934	9.08259	12.0088
ENSMUSG00000001248	Gramd1a	0.228162	1.44e-09	4.02e-09	1276.65	1273.06	1329.36	1657.22
ENSMUSG00000001270	Ckb	0.406809	0.00244596	0.00435138	94.0814	74.9498	135.413	88.6807
ENSMUSG00000001280	Sp1	0.54747	4.4e-243	3.21e-242	5812.8	6082.88	8223.05	9162.74
ENSMUSG00000001281	Itgb7	0.0410367	0.42735	0.461832	61.927	24.9833	40.4588	48.9591
ENSMUSG00000001285	Myg1	0.161398	0.004601	0.00789845	528.761	496.407	543.304	603.213
ENSMUSG00000001288	Rarg	-0.634211	0.274346	0.32388	0	10.8623	3.30276	3.69503
ENSMUSG00000001289	Pfdn5	-0.178986	4.87e-05	0.000103736	1064.67	990.641	891.746	923.757
ENSMUSG00000001300	Efnb2	0.772153	1.45e-06	3.45e-06	69.0724	40.1905	93.303	93.2994
ENSMUSG00000001305	Rrp15	0.108215	4.27e-05	9.13e-05	2672.39	2540.69	2878.36	2740.79
ENSMUSG00000001313	Rnd2	0.795924	0.000963178	0.00180259	16.6727	28.242	51.1928	26.7889
ENSMUSG00000001323	Srr	0.702242	1.72e-13	5.49e-13	175.063	149.9	246.056	282.67
ENSMUSG00000001333	Sync	1.14615	0.000836563	0.00157605	8.33633	11.9485	26.4221	18.4751
ENSMUSG00000001334	Fndc5	2.09622	0.00176546	0.0032023	1.1909	2.17246	3.30276	11.0851
ENSMUSG00000001348	Acp5	-0.400432	0.0488319	0.0704936	69.0724	17.3797	39.6331	25.8652
ENSMUSG00000001349	Cnn1	0.719546	0.0547237	0.0782533	15.4817	3.25869	12.3854	18.4751
ENSMUSG00000001366	Fbxo9	-0.662075	7.21e-18	2.61e-17	443.016	358.456	199.817	306.687
ENSMUSG00000001376	Vps50	0.237696	1.17e-06	2.8e-06	774.087	694.101	839.727	891.425
ENSMUSG00000001380	Hars	0.0255319	0.23481	0.284246	1861.38	1550.05	1657.16	1815.18
ENSMUSG00000001383	Zmat2	-0.234553	4.39e-19	1.63e-18	3214.25	3037.1	2404.41	2908.91
ENSMUSG00000001403	Ube2c	-0.267538	1.43e-17	5.15e-17	2272.24	2145.3	1674.5	1995.31
ENSMUSG00000001415	Smg5	0.320429	2.13e-30	9.49e-30	2366.33	2177.89	2786.7	2887.66
ENSMUSG00000001416	Cct3	0.101814	1.24e-08	3.3e-08	6251.05	5661.43	6186.07	6597.47
ENSMUSG00000001418	Glmp	0.00699992	0.477604	0.504789	192.926	174.883	146.973	222.625
ENSMUSG00000001419	Mef2d	0.0769145	1.47e-05	3.28e-05	6384.43	5475.68	5848.36	6661.21
ENSMUSG00000001420	Tmem79	0.646991	3.58e-07	8.81e-07	107.181	77.1223	144.496	144.106
ENSMUSG00000001424	Snd1	0.105737	1.21e-07	3.07e-07	4736.22	4724.01	4675.88	5503.74
ENSMUSG00000001435	Col18a1	1.12925	6.24e-13	1.96e-12	29.7726	68.4325	73.4864	141.335
ENSMUSG00000001436	Slc19a1	0.513317	1.42e-37	6.76e-37	1088.49	933.071	1356.61	1528.82
ENSMUSG00000001440	Kpnb1	0.287106	2.91e-120	1.92e-119	12419.9	11537.9	14202.7	15030.4
ENSMUSG00000001441	Npepps	0.199892	3.54e-08	9.25e-08	1329.05	1449.03	1514.32	1676.62
ENSMUSG00000001445	Mrpl10	-0.0851642	0.0919036	0.124618	553.77	469.251	459.084	505.295
ENSMUSG00000001467	Cyp51	0.45101	1.57e-57	8.53e-57	1780.4	2439.67	2458.08	3310.74
ENSMUSG00000001472	Tcf25	0.300995	5.09e-71	2.96e-70	6196.27	6439.17	7197.54	8369.24
ENSMUSG00000001473	Tubb6	1.48633	1.36e-23	5.51e-23	36.918	55.3977	147.799	110.851
ENSMUSG00000001482	Def8	0.0505156	0.226167	0.274994	533.525	383.439	466.515	483.125
ENSMUSG00000001494	Sost	-1.26905	0.00762581	0.012707	7.14542	11.9485	3.30276	4.61878
ENSMUSG00000001496	Nkx2-1	10.3854	0	0	0	0	0.82569	1.84751
ENSMUSG00000001506	Col1a1	10.7325	0	0	0	0	2.47707	0.923757
ENSMUSG00000001517	Foxm1	0.00570466	0.412436	0.45004	3136.84	3009.94	2951.84	3219.29
ENSMUSG00000001518	Itfg2	0.497682	7.32e-24	2.98e-23	757.415	576.788	884.314	999.505
ENSMUSG00000001520	Nrip2	1.22952	2.56e-54	1.37e-53	190.545	175.969	432.662	426.776
ENSMUSG00000001521	Tulp3	0.021319	0.354731	0.399059	762.178	623.496	673.763	732.539
ENSMUSG00000001524	Gtf2h4	0.00414429	0.496087	0.520325	277.481	233.539	242.753	269.737
ENSMUSG00000001525	Tubb5	0.0100474	0.0545784	0.0780687	55067.4	50718.2	49746.2	56778.7
ENSMUSG00000001542	Ell2	0.750688	3.78e-263	2.79e-262	3177.33	3041.44	4944.23	5519.45
ENSMUSG00000001555	Fkbp10	1.46745	2.44e-05	5.33e-05	5.95452	10.8623	20.6423	25.8652
ENSMUSG00000001558	Klhl10	0.909544	0.010586	0.0172309	5.95452	11.9485	12.3854	21.2464
ENSMUSG00000001566	Mnx1	1.21683	0.0968262	0.130292	0	2.17246	4.12845	0.923757
ENSMUSG00000001569	Nom1	0.0121919	0.338223	0.383708	2419.92	2422.29	2245.05	2638.25
ENSMUSG00000001576	Ergic1	-0.165951	1.89e-06	4.45e-06	1835.18	1539.19	1345.88	1661.84
ENSMUSG00000001583	Tnk1	-0.634065	0.255883	0.304774	0	5.43115	1.65138	1.84751
ENSMUSG00000001588	Acap1	-0.0755781	0.0107243	0.0174415	2095.99	1888.95	1946.98	1834.58
ENSMUSG00000001627	Ifrd1	1.52931	0	0	1111.11	859.207	2693.4	2993.9
ENSMUSG00000001630	Stk38l	0.701993	5.39e-68	3.09e-67	887.223	948.278	1373.95	1611.96
ENSMUSG00000001632	Brpf1	0.775072	6.19e-226	4.48e-225	2566.4	2378.84	4175.52	4287.16
ENSMUSG00000001642	Akr1b3	0.0746581	0.0153152	0.0242603	1845.9	1518.55	1745.51	1797.63
ENSMUSG00000001663	Gstt1	1.98651	4.33e-14	1.41e-13	11.909	10.8623	41.2845	48.9591
ENSMUSG00000001665	Gstt3	0.355891	0.00120691	0.00223581	96.4632	157.503	141.193	183.828
ENSMUSG00000001666	Ddt	0.400601	4.82e-08	1.25e-07	323.926	291.109	389.726	422.157
ENSMUSG00000001674	Ddx18	0.209136	7.96e-13	2.49e-12	2173.4	2135.53	2316.06	2665.04
ENSMUSG00000001687	Ubl3	0.825463	1.04e-166	7.25e-166	1579.14	1546.79	2670.28	2869.19
ENSMUSG00000001700	Gramd3	1.69501	3.21e-288	2.39e-287	475.171	364.973	1417.71	1302.5
ENSMUSG00000001707	Eef1e1	0.579465	4.62e-44	2.32e-43	974.159	849.431	1260.83	1464.15
ENSMUSG00000001729	Akt1	0.140094	3.47e-08	9.08e-08	3190.43	2619.99	3053.4	3349.54
ENSMUSG00000001739	Cldn15	1.15622	5.97e-05	0.000126204	9.52723	18.4659	34.679	27.7127
ENSMUSG00000001741	Il16	0.453039	2.48e-25	1.03e-24	937.241	819.017	1084.13	1320.05
ENSMUSG00000001750	Tcirg1	0.0733879	0.0506735	0.0729685	1083.72	948.278	1084.96	1053.08
ENSMUSG00000001751	Naglu	-0.428539	0.000232919	0.000465547	138.145	169.452	105.688	122.86
ENSMUSG00000001755	Coasy	-0.093163	0.129968	0.168643	344.171	322.61	298.074	327.01
ENSMUSG00000001761	Smo	12.5213	0	0	0	0	9.90828	1.84751
ENSMUSG00000001763	Tspan33	1.263	0.0829096	0.113622	0	3.25869	4.12845	3.69503
ENSMUSG00000001767	Crnkl1	0.208722	7.07e-08	1.82e-07	1252.83	1157.92	1291.38	1494.64
ENSMUSG00000001768	Rin2	0.489923	0.156972	0.199897	9.52723	7.60361	7.43121	16.6276
ENSMUSG00000001774	Chordc1	0.135361	2.8e-05	6.08e-05	1869.72	1596.76	1713.31	2094.16
ENSMUSG00000001783	Rtcb	0.0206792	0.212834	0.260741	3257.12	2996.91	2901.48	3442.84
ENSMUSG00000001785	Pwp1	0.368797	4.23e-17	1.5e-16	964.632	827.707	1108.9	1205.5
ENSMUSG00000001786	Fbxo7	0.393052	1.72e-09	4.77e-09	439.443	349.766	428.533	607.832
ENSMUSG00000001794	Capns1	0.0606405	0.0767023	0.106296	1178.99	1079.71	1072.57	1283.1
ENSMUSG00000001829	Clpb	0.21355	1.56e-05	3.46e-05	726.451	713.653	780.277	889.578
ENSMUSG00000001833	2022-09-07	-0.0221707	0.191978	0.238945	3395.27	3271.72	2922.94	3642.37
ENSMUSG00000001844	Zdhhc4	-0.180053	0.0036023	0.00627064	513.28	458.389	408.717	448.946
ENSMUSG00000001847	Rac1	0.138178	6.76e-08	1.74e-07	2865.31	2818.77	2786.7	3468.71
ENSMUSG00000001855	Nup214	0.234329	6.56e-24	2.67e-23	3731.1	3091.41	3895.61	4130.12
ENSMUSG00000001864	Aif1l	10.7325	0	0	0	0	2.47707	0.923757
ENSMUSG00000001870	Ltbp1	1.67829	0.0329853	0.0491082	2.38181	0	5.77983	1.84751
ENSMUSG00000001891	Ugp2	0.131416	0.0172102	0.0270663	572.825	455.13	506.148	619.841
ENSMUSG00000001901	Kcnh6	-1.64206	0.00126295	0.00233414	8.33633	14.121	1.65138	5.54254
ENSMUSG00000001909	Trmt1	0.470285	1.82e-38	8.72e-38	1375.49	1148.14	1666.24	1829.96
ENSMUSG00000001910	Nacc1	0.258571	3.32e-27	1.42e-26	3234.49	3134.86	3698.27	3921.35
ENSMUSG00000001911	Nfix	0.0693137	0.0777666	0.107647	952.723	764.705	873.58	928.376
ENSMUSG00000001918	Slc1a5	0.0312232	0.0820565	0.112694	4216.99	4031	4035.97	4392.46
ENSMUSG00000001924	Uba1	0.00169093	0.470108	0.49785	4556.4	3807.23	4094.6	4278.84
ENSMUSG00000001930	Vwf	-1.54198	0.00955701	0.0156755	4.76361	8.68984	0	4.61878
ENSMUSG00000001942	Siae	-1.15664	0.0848525	0.11607	5.95452	4.34492	0	4.61878
ENSMUSG00000001943	Vsig2	0.471278	0.334083	0.380769	2.38181	0	3.30276	0
ENSMUSG00000001946	Esam	0.619779	0.052301	0.0749839	19.0545	7.60361	20.6423	20.3227
ENSMUSG00000001948	Spa17	-11.0858	0	0	0	4.34492	0	0
ENSMUSG00000001962	Fam50a	-0.215597	1.22e-05	2.72e-05	918.187	757.102	748.075	694.665
ENSMUSG00000001964	Emd	0.137391	0.00486667	0.00833298	789.569	605.03	757.984	775.956
ENSMUSG00000001983	Taco1	-0.470484	2.82e-05	6.13e-05	184.59	161.848	111.468	138.564
ENSMUSG00000001988	Npas1	0.48113	0.0150786	0.0239092	33.3453	40.1905	37.9818	64.663
ENSMUSG00000001998	Ap4e1	0.237699	1.38e-06	3.29e-06	746.697	710.394	794.314	923.757
ENSMUSG00000001999	Blvra	-0.176284	0.0389727	0.0572957	234.608	196.608	185.78	195.836
ENSMUSG00000002006	Pdzd4	-0.432659	0.035966	0.0532044	39.2998	42.3629	27.2478	33.2552
ENSMUSG00000002007	Srpk3	0.786448	1.1e-18	4.05e-18	186.972	167.279	260.918	350.104
ENSMUSG00000002010	Idh3g	-0.00292673	0.465944	0.494213	2081.7	2120.32	1900.74	2292.76
ENSMUSG00000002012	Pnck	8.85449	1	1	0	0	0	0.923757
ENSMUSG00000002014	Ssr4	0.0242802	0.350069	0.395138	595.452	489.889	514.405	589.357
ENSMUSG00000002015	Bcap31	-0.184018	5.67e-09	1.53e-08	2192.45	1995.4	1714.13	1972.22
ENSMUSG00000002017	Fam98a	0.332051	4.96e-14	1.61e-13	907.469	889.622	1019.73	1242.45
ENSMUSG00000002020	Ltbp2	-0.997126	9.92e-65	5.62e-64	919.378	578.96	399.634	351.028
ENSMUSG00000002028	Kmt2a	0.127399	4.32e-15	1.45e-14	7335.97	7233.2	7515.43	8398.8
ENSMUSG00000002031	Ift46	-0.254522	2.44e-05	5.33e-05	558.534	571.357	479.726	467.421
ENSMUSG00000002032	Tmem25	-0.75817	0.0818845	0.112498	2.38181	15.2072	5.77983	4.61878
ENSMUSG00000002043	Trappc6a	-0.122818	0.111077	0.147023	209.599	234.626	181.652	226.32
ENSMUSG00000002052	Supt6	0.200957	1.01e-28	4.39e-28	5880.68	5608.2	6354.51	6851.5
ENSMUSG00000002055	Spag5	0.0814115	0.000410951	0.000801263	3571.52	3216.33	3409.28	3772.62
ENSMUSG00000002057	Foxn1	-10.8036	0	0	3.57271	0	0	0
ENSMUSG00000002058	Unc119	-0.420713	6.96e-05	0.000146357	215.554	157.503	134.588	144.106
ENSMUSG00000002059	Rab34	12.7422	0	0	0	0	9.08259	4.61878
ENSMUSG00000002064	Sdf2	-0.0719979	0.190702	0.237603	294.153	329.128	257.615	335.324
ENSMUSG00000002068	Ccne1	0.753086	2.33e-81	1.41e-80	981.305	892.881	1520.92	1637.82
ENSMUSG00000002083	Bbc3	4.2425	0	0	375.135	367.146	7007.63	7042.72
ENSMUSG00000002100	Mybpc3	2.5071	1.29e-30	5.73e-30	15.4817	9.77606	74.3121	69.2818
ENSMUSG00000002102	Psmc3	0.193541	2.1e-14	6.9e-14	3026.09	2770.97	3138.45	3490.88
ENSMUSG00000002103	Acp2	0.201438	0.0545083	0.0779801	157.199	93.4157	140.367	147.801
ENSMUSG00000002104	Rapsn	-0.996445	0.0614917	0.0870842	8.33633	5.43115	4.12845	2.77127
ENSMUSG00000002105	Slc39a13	0.222878	0.0533573	0.0764072	110.754	104.278	111.468	139.487
ENSMUSG00000002107	Celf2	-0.0168317	0.190047	0.236849	5448.38	6069.85	5364.51	6020.12
ENSMUSG00000002108	Nr1h3	-0.00980639	0.532894	0.55347	14.2908	9.77606	16.5138	7.39006
ENSMUSG00000002109	Ddb2	-0.00292265	0.495106	0.519551	259.617	192.263	216.331	234.634
ENSMUSG00000002111	Spi1	0.948834	8.93e-168	6.21e-167	1150.41	1093.83	2017.16	2314.93
ENSMUSG00000002129	Sf3a1	0.0817899	9.27e-05	0.00019256	4509.95	3894.13	4235.79	4658.51
ENSMUSG00000002147	Stat6	0.3413	1.65e-25	6.88e-25	1711.33	1579.38	1959.36	2209.63
ENSMUSG00000002190	Clgn	-0.00848231	0.381864	0.422839	2792.67	2779.66	2575.33	2964.34
ENSMUSG00000002204	Napsa	0.0150703	0.339429	0.38479	1726.81	1336.06	1489.55	1605.49
ENSMUSG00000002205	Vrk3	-0.213435	0.000134601	0.000275967	657.379	622.409	483.029	620.765
ENSMUSG00000002210	Smg9	0.107498	0.0503353	0.0725383	504.943	424.716	503.671	497.905
ENSMUSG00000002221	Paxip1	0.35428	1.02e-32	4.64e-32	2062.65	1888.95	2446.52	2604.99
ENSMUSG00000002222	Rmnd5a	0.138979	1e-06	2.41e-06	2153.15	2404.91	2191.38	2827.62
ENSMUSG00000002227	Mov10	0.389317	3.98e-08	1.04e-07	342.98	316.093	377.34	485.896
ENSMUSG00000002228	Ppm1j	11.9872	0	0	0	0	1.65138	6.4663
ENSMUSG00000002233	Rhoc	0.578238	0.0764203	0.10596	14.2908	5.43115	16.5138	12.9326
ENSMUSG00000002240	Prr27	-9.22026	0	0	1.1909	0	0	0
ENSMUSG00000002249	Tead3	1.70596	4.93e-23	1.97e-22	34.5362	26.0695	100.734	96.9945
ENSMUSG00000002250	Ppard	0.41474	2.15e-15	7.26e-15	624.034	606.116	776.149	863.713
ENSMUSG00000002257	Def6	0.261136	1.63e-09	4.54e-09	1018.22	880.932	1066.79	1209.2
ENSMUSG00000002274	Metrn	-0.350388	6.41e-09	1.73e-08	606.17	581.133	488.809	442.48
ENSMUSG00000002279	Lmf1	-0.0427468	0.25654	0.305463	489.461	504.01	419.451	545.017
ENSMUSG00000002280	Ciao3	0.0715244	0.173497	0.218485	422.771	335.645	383.12	413.843
ENSMUSG00000002289	Angptl4	-0.819019	2.43e-11	7.24e-11	169.108	157.503	105.688	79.4431
ENSMUSG00000002297	Dbf4	0.0445665	0.0779052	0.107815	1966.18	2171.37	1893.31	2374.06
ENSMUSG00000002307	Daxx	0.2559	1.3e-09	3.63e-09	1015.84	990.641	1146.06	1249.84
ENSMUSG00000002308	Cd320	0.0441339	0.360924	0.405174	152.436	152.072	109.817	204.15
ENSMUSG00000002319	Ipo4	0.178966	2.3e-05	5.05e-05	1092.06	908.088	1126.24	1138.07
ENSMUSG00000002320	Tm9sf1	0.0103705	0.39929	0.438304	1230.2	1285.01	1279.82	1253.54
ENSMUSG00000002324	Rec8	0.929664	0.0262881	0.0399152	2.38181	8.68984	9.08259	12.0088
ENSMUSG00000002325	Irf9	0.49581	6.95e-16	2.39e-15	412.053	447.527	543.304	668.8
ENSMUSG00000002326	Gmpr2	0.322823	0.00730421	0.0122219	120.281	94.502	118.074	150.572
ENSMUSG00000002329	Mdp1	-0.431153	1e-10	2.92e-10	534.716	467.079	331.928	411.072
ENSMUSG00000002332	Dhrs1	-0.363704	7.71e-06	1.75e-05	346.553	301.972	213.028	290.983
ENSMUSG00000002341	Ncan	11.0459	0	0	0	0	3.30276	0.923757
ENSMUSG00000002342	Tmem161a	-0.177774	0.011161	0.018112	384.662	349.766	312.111	337.171
ENSMUSG00000002343	Armc6	-0.122377	0.134543	0.174005	178.636	174.883	151.101	173.666
ENSMUSG00000002345	Borcs8	-0.224461	0.00475028	0.00814092	294.153	312.834	253.487	266.042
ENSMUSG00000002346	Slc25a42	-0.0324975	0.419589	0.455317	154.817	126.003	130.459	144.106
ENSMUSG00000002365	Snx9	-0.0552956	0.0586954	0.0834555	1814.94	1633.69	1610.92	1708.03
ENSMUSG00000002372	Ranbp3	0.308305	1.52e-22	6.06e-22	1855.43	1711.9	2140.19	2277.06
ENSMUSG00000002379	Ndufa11	0.0224324	0.378931	0.420123	408.48	338.904	328.625	430.471
ENSMUSG00000002384	Bmp8b	1.36334	7.09e-08	1.82e-07	25.009	8.68984	32.2019	54.5017
ENSMUSG00000002393	Nr2f6	0.285536	0.0024393	0.00434034	161.963	190.09	198.166	230.939
ENSMUSG00000002395	Use1	0.29026	2.1e-08	5.53e-08	701.442	593.081	780.277	802.745
ENSMUSG00000002396	Ocel1	0.147025	0.035975	0.0532136	272.717	306.317	271.652	369.503
ENSMUSG00000002409	Dyrk1b	0.850763	6.59e-24	2.68e-23	181.017	207.47	315.414	385.207
ENSMUSG00000002413	Braf	0.511559	3.59e-52	1.9e-51	1514.83	1361.05	1849.55	2250.27
ENSMUSG00000002416	Ndufb2	-0.119661	0.0569697	0.0812298	407.289	342.162	344.313	345.485
ENSMUSG00000002428	Hltf	-0.155335	0.00148429	0.00271585	751.46	836.397	649.818	775.956
ENSMUSG00000002455	Prpf6	0.035652	0.136066	0.175751	2000.72	1871.57	1852.85	2116.33
ENSMUSG00000002458	Rgs19	0.248252	5.25e-08	1.36e-07	919.378	784.258	960.278	1063.24
ENSMUSG00000002459	Rgs20	0.0753399	0.304982	0.353693	126.236	111.882	135.413	115.47
ENSMUSG00000002475	Abhd3	10.6903	0	0	0	0	3.30276	0
ENSMUSG00000002477	Snrpd1	0.0151276	0.248303	0.297291	4565.92	3855.03	4144.97	4364.75
ENSMUSG00000002486	Tchp	0.218868	0.000648618	0.00123637	389.426	424.716	453.304	494.21
ENSMUSG00000002496	Tsc2	-0.117705	0.00174834	0.00317605	1286.18	1353.44	1138.63	1294.18
ENSMUSG00000002500	Rpl3l	2.59812	8.96e-09	2.4e-08	2.38181	3.25869	15.6881	18.4751
ENSMUSG00000002504	Slc9a3r2	-11.2184	0	0	4.76361	0	0	0
ENSMUSG00000002524	Puf60	0.391883	1.96e-57	1.07e-56	2971.3	2763.37	3480.28	4044.21
ENSMUSG00000002546	Golga2	-0.0102427	0.406347	0.444774	1350.48	1143.8	1212.94	1263.7
ENSMUSG00000002550	Uck1	0.302801	5.06e-10	1.44e-09	752.651	724.515	866.975	955.165
ENSMUSG00000002565	Scin	0.227275	0.0647939	0.091371	73.836	109.709	80.9176	133.945
ENSMUSG00000002578	Ikzf4	0.615454	2.91e-07	7.21e-07	111.945	95.5882	161.835	156.115
ENSMUSG00000002580	Mien1	0.357089	0.00193808	0.00349631	133.381	104.278	143.67	160.734
ENSMUSG00000002588	Pon1	-10.0864	0	0	0	2.17246	0	0
ENSMUSG00000002602	Axl	2.27705	0.0226684	0.0348383	1.1909	0	5.77983	0
ENSMUSG00000002603	Tgfb1	0.33183	1.91e-50	1e-49	3772.78	3418.36	3905.52	5145.33
ENSMUSG00000002608	Ccdc97	0.578514	1.06e-53	5.69e-53	1270.69	975.434	1687.71	1666.46
ENSMUSG00000002617	Zfp40	-0.526025	2.6e-05	5.67e-05	138.145	148.813	103.211	96.0707
ENSMUSG00000002625	Akap8l	-0.0602732	0.142293	0.182946	613.315	701.704	588.717	672.495
ENSMUSG00000002635	Pdcd2l	0.132984	0.046254	0.0670885	340.598	282.42	353.395	329.781
ENSMUSG00000002658	Gtf2f1	-0.0705239	0.00463262	0.00794847	2959.4	2793.78	2614.14	2864.57
ENSMUSG00000002660	Clpp	0.288416	9.38e-05	0.000194584	356.08	265.04	364.129	394.444
ENSMUSG00000002661	Alkbh7	-0.658859	5.68e-07	1.38e-06	150.054	118.399	85.0461	84.9856
ENSMUSG00000002664	Pspn	1.41368	0.00316438	0.005552	7.14542	2.17246	16.5138	8.31381
ENSMUSG00000002668	Dennd1c	-0.335826	0.000179696	0.000363088	265.572	255.264	196.514	216.159
ENSMUSG00000002679	Med6	0.462673	1.61e-10	4.65e-10	323.926	298.713	405.414	452.641
ENSMUSG00000002699	Lcp2	-2.10138	0.000148681	0.000303221	15.4817	4.34492	0	4.61878
ENSMUSG00000002718	Cse1l	0.28547	4.79e-36	2.26e-35	3489.35	3486.8	4041.75	4460.82
ENSMUSG00000002728	Naa20	0.470114	1.67e-19	6.28e-19	683.579	535.511	792.663	896.044
ENSMUSG00000002731	Prkra	-0.135877	0.229294	0.278303	75.0269	56.4839	57.7983	61.8917
ENSMUSG00000002732	Fkbp7	0.080405	0.395087	0.434607	59.5452	28.242	42.9359	49.8829
ENSMUSG00000002733	Plekha3	0.495888	2.65e-20	1.01e-19	547.816	577.874	743.121	844.314
ENSMUSG00000002741	Ykt6	0.17939	1.52e-06	3.61e-06	1381.45	1235.04	1450.74	1512.19
ENSMUSG00000002748	Baz1b	0.191251	6.56e-54	3.52e-53	12879.6	11881.2	13299.4	14971.3
ENSMUSG00000002763	Pex6	-0.088494	0.104159	0.138811	481.125	382.353	411.194	400.91
ENSMUSG00000002767	Mrpl2	0.0318175	0.300783	0.34954	643.088	483.372	586.24	565.339
ENSMUSG00000002768	Mea1	0.0829571	0.190503	0.237371	225.081	260.695	295.597	218.93
ENSMUSG00000002769	Gnmt	1.59163	1.19e-07	3e-07	9.52723	11.9485	30.5505	34.179
ENSMUSG00000002771	Grin2d	-2.21453	0.0122467	0.0197308	5.95452	2.17246	0.82569	0.923757
ENSMUSG00000002778	Kdelr1	-0.0331447	0.317712	0.365989	547.816	426.888	457.432	495.134
ENSMUSG00000002781	Tmem143	-0.31713	0.0148148	0.0235316	85.7451	136.865	90.0002	88.6807
ENSMUSG00000002797	Ggct	-0.365988	7.13e-05	0.000149747	270.335	225.936	180	205.074
ENSMUSG00000002799	Jag2	1.19019	1.23e-08	3.28e-08	27.3908	23.897	41.2845	75.7481
ENSMUSG00000002803	Btbd6	0.318852	0.000334825	0.000658837	201.263	205.297	217.982	289.136
ENSMUSG00000002804	Nudt14	-0.162722	0.148135	0.189736	117.899	89.0708	99.9085	84.9856
ENSMUSG00000002812	Flii	-0.117541	1.77e-05	3.92e-05	2745.03	2573.28	2412.67	2489.52
ENSMUSG00000002814	Top3a	0.553299	1.27e-46	6.48e-46	1045.61	1094.92	1467.25	1673.85
ENSMUSG00000002820	Atg4d	0.395713	7.15e-14	2.31e-13	650.233	556.149	776.975	810.135
ENSMUSG00000002825	Qtrt1	1.01613	1.12e-44	5.65e-44	232.226	254.178	490.46	493.286
ENSMUSG00000002831	Plin4	1.31337	6.35e-17	2.25e-16	42.8725	46.7079	93.303	129.326
ENSMUSG00000002833	Hdgfl2	0.0682039	0.0151129	0.0239596	2129.34	1978.02	2048.54	2257.66
ENSMUSG00000002835	Chaf1a	0.0860925	0.000104238	0.00021562	3962.14	3497.66	3810.56	4107.95
ENSMUSG00000002844	Adprh	-0.230232	0.000421207	0.000820097	520.425	402.991	364.129	423.081
ENSMUSG00000002845	Tmem39a	0.984999	4.2e-79	2.52e-78	438.253	512.7	913.213	969.021
ENSMUSG00000002846	Timmdc1	-0.159772	0.00807499	0.0133999	509.707	484.458	362.478	527.465
ENSMUSG00000002847	Pla1a	11.0121	0	0	0	0	4.12845	0
ENSMUSG00000002870	Mcm2	0.350508	5.41e-78	3.22e-77	5432.9	4583.89	5976.35	6795.16
ENSMUSG00000002871	Tpra1	-0.130192	0.0442311	0.0644359	412.053	342.162	279.909	409.224
ENSMUSG00000002881	Nab1	0.134237	6.62e-07	1.61e-06	2600.93	2505.93	2539.82	3065.03
ENSMUSG00000002885	Adgre5	1.35254	7.83e-18	2.83e-17	48.8271	38.018	123.854	97.9182
ENSMUSG00000002897	Il17ra	0.213232	9.88e-28	4.25e-27	5147.09	4633.85	5423.13	5915.74
ENSMUSG00000002900	Lamb1	0.733222	0.0971431	0.130682	4.76361	7.60361	5.77983	14.7801
ENSMUSG00000002910	Arrdc2	0.388912	0.00012219	0.000251323	166.727	141.21	175.046	228.168
ENSMUSG00000002944	Cd36	0.333041	0.000128382	0.000263722	229.844	205.297	284.863	263.271
ENSMUSG00000002948	Map2k7	0.33132	5.85e-17	2.07e-16	1162.32	1079.71	1371.47	1449.37
ENSMUSG00000002949	Timm44	0.143657	1.64e-05	3.63e-05	1593.43	1685.83	1582.02	2040.58
ENSMUSG00000002957	Ap2a2	-0.0153387	0.383439	0.42421	908.66	853.776	787.709	956.088
ENSMUSG00000002963	Pnkp	0.0146317	0.43077	0.464883	372.753	328.041	339.359	368.579
ENSMUSG00000002968	Med25	-0.0657476	0.112331	0.14851	740.742	735.377	701.837	708.522
ENSMUSG00000002981	Clptm1	0.482531	5.52e-44	2.76e-43	1408.84	1337.15	1724.04	2112.63
ENSMUSG00000002983	Relb	4.1815	0	0	119.09	106.45	1989.09	2103.39
ENSMUSG00000002984	Tomm40	0.392137	1.23e-31	5.53e-31	1676.79	1381.68	1913.12	2100.62
ENSMUSG00000002985	Apoe	1.20466	2.53e-91	1.57e-90	341.789	319.351	765.415	758.404
ENSMUSG00000002992	Apoc2	-10.0864	0	0	0	2.17246	0	0
ENSMUSG00000002996	Hbp1	0.440554	3.62e-14	1.18e-13	502.561	479.027	644.864	687.275
ENSMUSG00000002997	Prkar2b	0.0996524	0.0801842	0.110485	440.634	388.87	457.432	431.394
ENSMUSG00000003031	Cdkn1b	0.457957	6.65e-43	3.31e-42	1656.55	1342.58	1916.43	2203.16
ENSMUSG00000003032	Klf4	-9.22026	0	0	1.1909	0	0	0
ENSMUSG00000003033	Ap1m1	-0.0260035	0.254161	0.30323	1462.43	1416.44	1284.77	1542.67
ENSMUSG00000003037	Rab8a	0.0258279	0.199755	0.247363	2238.9	2224.6	2160.83	2383.29
ENSMUSG00000003038	Hmgn2	-0.0227992	0.0509273	0.0733036	11377.9	10199.7	10108.9	11130.3
ENSMUSG00000003039	Fam32a	0.0228032	0.253597	0.302669	1804.22	1762.95	1593.58	2030.42
ENSMUSG00000003051	Elf3	8.69295	1	1	0	0	0.82569	0
ENSMUSG00000003062	Stard3nl	-1.07755	1.74e-40	8.47e-40	439.443	360.628	175.872	203.227
ENSMUSG00000003068	Stk11	0.172892	1.13e-10	3.28e-10	2742.65	2439.67	2774.32	3067.8
ENSMUSG00000003070	Efna2	-1.97801	0.0650289	0.0915214	0	3.25869	0.82569	0
ENSMUSG00000003072	Atp5d	0.148948	4.57e-05	9.76e-05	1512.45	1165.52	1421.01	1548.22
ENSMUSG00000003099	Ppp5c	-0.00336684	0.467039	0.495117	1920.93	1659.76	1717.44	1854.9
ENSMUSG00000003119	Cdk12	0.503309	6.73e-171	4.71e-170	4900.57	5163.93	6902.77	7363.27
ENSMUSG00000003123	Lipe	-0.188089	0.0427011	0.0623579	190.545	177.055	161.01	161.657
ENSMUSG00000003131	Pafah1b2	0.264054	1.15e-35	5.42e-35	3863.29	4274.31	4506.62	5265.41
ENSMUSG00000003134	Tbc1d8	0.761923	3.79e-09	1.04e-08	82.1724	87.9846	152.753	135.792
ENSMUSG00000003135	Cnot11	0.0586612	0.112613	0.148863	996.786	748.412	959.452	858.17
ENSMUSG00000003153	Slc2a3	0.215425	0.0012398	0.00229289	394.189	347.593	425.231	436.013
ENSMUSG00000003154	Foxj2	0.811134	1.29e-18	4.75e-18	157.199	170.538	307.157	267.889
ENSMUSG00000003161	Sri	0.138801	0.000116116	0.000239316	1398.12	1378.43	1506.88	1550.06
ENSMUSG00000003166	Dgcr2	0.243362	2.66e-16	9.25e-16	2149.58	1988.89	2300.37	2598.53
ENSMUSG00000003184	Irf3	0.738585	3.56e-58	1.95e-57	738.36	648.479	1127.89	1186.1
ENSMUSG00000003190	Bcl2l12	-0.601661	8.94e-09	2.4e-08	216.744	203.125	143.67	133.021
ENSMUSG00000003198	Zfp959	0.673553	4.29e-23	1.72e-22	364.417	285.678	525.139	511.761
ENSMUSG00000003199	Mpnd	-0.136391	0.00352745	0.00614702	899.132	792.947	750.552	788.888
ENSMUSG00000003200	Sh3gl1	0.865087	2.38e-129	1.58e-128	1157.56	1002.59	1762.85	2171.75
ENSMUSG00000003206	Ebi3	11.0121	0	0	0	0	4.12845	0
ENSMUSG00000003208	Yju2	0.466607	6.88e-16	2.37e-15	545.434	438.837	619.268	740.853
ENSMUSG00000003226	Ranbp2	0.300601	5.37e-95	3.37e-94	8236.29	8841.91	9826.54	11207.9
ENSMUSG00000003228	Grk5	0.463898	4.19e-06	9.65e-06	158.39	149.9	199.817	225.397
ENSMUSG00000003233	Dvl3	0.0909362	0.0129913	0.020838	1257.59	1143.8	1122.11	1435.52
ENSMUSG00000003234	Abcf3	0.302661	8.41e-09	2.26e-08	659.761	601.771	774.498	781.498
ENSMUSG00000003235	Eif2b5	0.184185	4.75e-08	1.23e-07	1660.12	1565.26	1695.14	1969.45
ENSMUSG00000003269	Cyth2	0.610501	1.19e-36	5.66e-36	694.297	639.789	886.791	1150.08
ENSMUSG00000003271	Sult2b1	1.90523	0.000236599	0.000472559	4.76361	1.08623	9.90828	12.0088
ENSMUSG00000003273	Car11	-0.294512	0.256795	0.305709	25.009	11.9485	10.734	19.3989
ENSMUSG00000003279	Dlgap1	0.801414	0.02213	0.0341318	11.909	7.60361	24.7707	9.23757
ENSMUSG00000003282	Plag1	0.556615	0.0651832	0.0916984	9.52723	19.5521	13.211	29.5602
ENSMUSG00000003283	Hck	8.85449	1	1	0	0	0	0.923757
ENSMUSG00000003299	Mrpl4	0.351021	5.1e-10	1.45e-09	613.315	457.303	651.47	714.064
ENSMUSG00000003308	Keap1	-0.306894	5.34e-11	1.58e-10	1071.81	914.605	775.323	830.457
ENSMUSG00000003309	Ap1m2	-0.472605	0.0932315	0.126231	7.14542	30.4144	13.211	13.8564
ENSMUSG00000003316	Glg1	0.00835874	0.377685	0.418935	3012.99	3255.43	2852.76	3452.08
ENSMUSG00000003341	Atp8b3	0.447687	0.172065	0.216923	8.33633	10.8623	20.6423	5.54254
ENSMUSG00000003344	Btbd2	-0.574748	4.28e-08	1.11e-07	228.654	190.09	113.945	167.2
ENSMUSG00000003345	Csnk1g2	-0.30726	2.14e-26	9.06e-26	2762.9	2525.48	1931.29	2342.65
ENSMUSG00000003346	Abhd17a	-0.34477	3.25e-08	8.52e-08	666.906	451.871	445.873	435.089
ENSMUSG00000003348	Mob3a	1.40999	0	0	981.305	1104.7	2778.45	2764.8
ENSMUSG00000003352	Cacnb3	2.35691	2.02e-09	5.58e-09	4.76361	3.25869	27.2478	13.8564
ENSMUSG00000003354	Ccdc65	-11.5403	0	0	5.95452	0	0	0
ENSMUSG00000003355	Fkbp11	-0.276663	0.254368	0.303438	19.0545	17.3797	18.9909	11.0851
ENSMUSG00000003360	Ddx23	0.0554741	0.00572189	0.00971011	4494.47	3975.6	4249.83	4552.27
ENSMUSG00000003363	Pld3	-0.942471	8.44e-14	2.72e-13	156.008	157.503	80.9176	82.2144
ENSMUSG00000003378	Grik5	-0.0407459	0.491861	0.516738	20.2454	28.242	23.1193	24.0177
ENSMUSG00000003379	Cd79a	-0.0758797	6.8e-10	1.92e-09	14636.2	12422.1	12477	13194.9
ENSMUSG00000003380	Rabac1	-0.154168	0.0207707	0.0321692	431.107	345.421	385.597	312.23
ENSMUSG00000003382	Etv3	0.545547	2.41e-44	1.21e-43	1098.01	999.331	1408.63	1652.6
ENSMUSG00000003402	Prkcsh	0.065706	0.0313502	0.0469241	1667.27	1584.81	1496.98	1906.63
ENSMUSG00000003410	Elavl3	0.617981	0.0521667	0.0748192	19.0545	4.34492	16.5138	19.3989
ENSMUSG00000003411	Rab3b	8.85449	1	1	0	0	0	0.923757
ENSMUSG00000003420	Fcgrt	11.5454	0	0	0	0	4.12845	1.84751
ENSMUSG00000003421	Nosip	-0.107619	0.0147445	0.0234266	964.632	797.292	744.773	890.502
ENSMUSG00000003423	Pih1d1	0.186085	0.00692676	0.0116348	353.698	319.351	374.038	391.673
ENSMUSG00000003429	Rps11	-0.291318	1.04e-60	5.77e-60	7740.87	6362.05	5985.43	5538.85
ENSMUSG00000003435	Supt5	0.138613	3.19e-10	9.12e-10	4018.11	3754.01	3997.17	4558.74
ENSMUSG00000003436	Dll3	3.17572	3.68e-18	1.34e-17	0	6.51738	17.3395	41.5691
ENSMUSG00000003437	Paf1	0.0691044	0.0186986	0.0291664	1918.55	1780.33	1791.75	2088.61
ENSMUSG00000003438	Timm50	0.179092	8.34e-05	0.000174118	905.087	801.637	872.755	1059.55
ENSMUSG00000003444	Med29	0.215321	0.0058309	0.00988901	283.435	234.626	255.964	345.485
ENSMUSG00000003452	Bicd1	-0.32917	4.25e-09	1.16e-08	697.87	677.807	494.588	600.442
ENSMUSG00000003458	Ncstn	0.120109	0.00562743	0.00955319	911.041	844	825.69	1081.72
ENSMUSG00000003464	Pex19	-0.0106041	0.428812	0.462951	747.888	591.995	623.396	706.674
ENSMUSG00000003469	Phyhip	-0.365772	0.369901	0.411224	1.1909	0	0	0.923757
ENSMUSG00000003484	Cyp4f18	-0.0514786	0.146271	0.18756	1055.14	789.689	885.966	894.197
ENSMUSG00000003500	Impdh1	0.276619	3.01e-07	7.44e-07	629.988	572.443	631.653	824.915
ENSMUSG00000003518	Dusp3	1.02682	1.89e-67	1.08e-66	344.171	384.525	658.901	825.839
ENSMUSG00000003526	Prodh	0.225938	0.198316	0.245706	38.1089	21.7246	33.0276	36.9503
ENSMUSG00000003527	Ess2	0.148622	0.00308454	0.00541933	776.469	555.063	677.892	798.126
ENSMUSG00000003528	Slc25a1	-0.18884	2.18e-06	5.11e-06	1373.11	1202.46	1049.45	1210.12
ENSMUSG00000003531	Dgcr6	-0.314115	7.9e-06	1.79e-05	463.262	388.87	311.285	374.122
ENSMUSG00000003534	Ddr1	-9.22026	0	0	1.1909	0	0	0
ENSMUSG00000003541	Ier3	5.97027	0	0	8.33633	5.43115	439.267	424.004
ENSMUSG00000003545	Fosb	2.27158	1.37e-143	9.3e-143	69.0724	103.192	222.111	609.68
ENSMUSG00000003546	Klc4	0.33958	0.00037928	0.000742369	142.908	212.901	214.679	235.558
ENSMUSG00000003549	Ercc1	0.233851	0.000769439	0.00145558	345.362	348.68	330.276	485.896
ENSMUSG00000003555	Cyp17a1	-2.36396	0.078872	0.108817	4.76361	0	0	0.923757
ENSMUSG00000003559	As3mt	0.859961	0.334083	0.380769	2.38181	0	2.47707	1.84751
ENSMUSG00000003573	Homer3	-0.221767	0.013592	0.0217364	245.326	190.09	161.835	211.54
ENSMUSG00000003575	Crtc1	0.401555	1.05e-12	3.27e-12	610.934	445.354	704.314	690.97
ENSMUSG00000003581	Rnf215	0.294324	0.00106067	0.00197622	214.363	192.263	227.065	271.585
ENSMUSG00000003585	Sec14l2	0.68021	0.000866	0.00162864	41.6816	26.0695	50.3671	58.1967
ENSMUSG00000003604	Aven	0.123941	0.0213233	0.0329827	535.907	517.045	574.68	572.729
ENSMUSG00000003617	Cp	0.38301	0.203203	0.25036	7.14542	16.2934	14.8624	15.7039
ENSMUSG00000003623	Crot	-0.59476	9.47e-15	3.15e-14	354.889	432.319	231.193	290.06
ENSMUSG00000003644	Rps6ka1	-0.0096576	0.419518	0.455266	1090.87	1025.4	998.26	1103.89
ENSMUSG00000003660	Snrnp200	0.0762931	8.88e-06	2e-05	6359.43	6345.75	6309.93	7085.22
ENSMUSG00000003662	Ciao1	0.221639	0.000370076	0.000724795	440.634	430.147	457.432	557.949
ENSMUSG00000003665	Has1	1.65975	0.0253358	0.0385757	0	3.25869	6.60552	3.69503
ENSMUSG00000003680	Taf6l	0.309614	2.89e-05	6.27e-05	320.353	285.678	349.267	401.834
ENSMUSG00000003721	Insig2	-0.399681	1.62e-07	4.06e-07	381.089	375.835	224.588	349.18
ENSMUSG00000003731	Kpna6	0.120389	0.000608089	0.00116187	1598.19	1268.72	1457.34	1659.07
ENSMUSG00000003746	Man1a	0.297221	2.53e-42	1.25e-41	3411.94	4155.91	4046.71	5252.48
ENSMUSG00000003752	Itpkc	1.30477	8.55e-62	4.77e-61	210.79	148.813	414.497	473.887
ENSMUSG00000003762	Coq8b	-0.355248	0.00836972	0.0138662	111.945	91.2433	47.0643	111.775
ENSMUSG00000003778	Brd8	0.336364	3.23e-65	1.83e-64	4651.67	4451.37	5383.5	6109.73
ENSMUSG00000003779	Kif20a	-0.177446	4.19e-08	1.09e-07	1904.26	2068.18	1659.64	1853.06
ENSMUSG00000003808	Farsa	0.284411	3.38e-15	1.14e-14	1436.23	1299.13	1622.48	1708.95
ENSMUSG00000003809	Gcdh	0.190644	0.0275835	0.0417372	211.981	187.918	232.845	223.549
ENSMUSG00000003810	Mast2	0.237664	2.47e-16	8.61e-16	2349.65	1997.58	2560.47	2565.27
ENSMUSG00000003812	Dnase2a	0.581218	4.4e-14	1.43e-13	289.39	237.884	365.781	423.081
ENSMUSG00000003813	Rad23a	0.160575	0.000964597	0.00180491	709.779	737.55	838.076	779.651
ENSMUSG00000003814	Calr	0.201133	1.1e-37	5.26e-37	8613.81	6705.29	8809.29	8801.56
ENSMUSG00000003824	Syce2	0.156833	0.0151331	0.0239878	375.135	374.749	388.9	447.098
ENSMUSG00000003847	Nfat5	0.20224	1e-15	3.43e-15	2770.04	3074.03	3037.71	3685.79
ENSMUSG00000003848	Nob1	0.339545	2.08e-25	8.65e-25	1675.6	1623.91	2055.97	2119.1
ENSMUSG00000003849	Nqo1	0.936231	0.147361	0.188895	1.1909	4.34492	4.12845	6.4663
ENSMUSG00000003863	Ppfia3	1.21222	0.00123656	0.00228735	4.76361	10.8623	14.0367	22.1702
ENSMUSG00000003865	Gys1	-0.414062	8.91e-10	2.5e-09	483.507	488.803	381.469	348.256
ENSMUSG00000003868	Ruvbl2	-0.126308	2.73e-05	5.94e-05	2181.74	2208.3	1890.01	2132.03
ENSMUSG00000003872	Lin7b	2.16995	6.9e-07	1.67e-06	1.1909	6.51738	18.9909	15.7039
ENSMUSG00000003873	Bax	1.16038	1.89e-301	1.41e-300	1351.68	1096.01	2663.68	2807.3
ENSMUSG00000003882	Il7r	-0.131754	0.00230346	0.00411957	1131.36	889.622	973.489	871.103
ENSMUSG00000003923	Tfam	0.475857	2.06e-38	9.86e-38	1213.53	1244.82	1632.39	1786.55
ENSMUSG00000003929	Zfp81	0.300124	1.57e-07	3.94e-07	534.716	519.218	608.534	689.123
ENSMUSG00000003934	Efnb3	1.58806	8.64e-13	2.69e-12	17.8636	20.6384	52.0185	63.7392
ENSMUSG00000003948	Mmd	-0.0550843	0.329724	0.377612	156.008	152.072	132.11	164.429
ENSMUSG00000003955	Fam162a	-0.0139269	0.402382	0.441245	700.251	820.103	653.121	852.628
ENSMUSG00000003970	Rpl8	-0.0628216	9.81e-09	2.62e-08	17883.8	15851.3	16042.3	16255.3
ENSMUSG00000003974	Grm3	12.18	0	0	0	0	7.43121	1.84751
ENSMUSG00000003992	Ssbp2	0.183953	0.0123878	0.0199464	300.108	279.161	300.551	357.494
ENSMUSG00000004018	Fancl	0.110008	0.0409863	0.0600542	528.761	465.992	511.928	561.644
ENSMUSG00000004032	Gstm5	-11.7384	0	0	3.57271	3.25869	0	0
ENSMUSG00000004040	Stat3	0.693843	6.79e-130	4.52e-129	1688.7	1972.59	2603.4	3319.06
ENSMUSG00000004043	Stat5a	-0.420487	7.15e-11	2.1e-10	622.843	451.871	378.992	424.004
ENSMUSG00000004054	Map3k11	0.659328	1.71e-65	9.72e-65	1077.77	967.83	1412.76	1817.95
ENSMUSG00000004056	Akt2	0.296158	2.63e-23	1.06e-22	2132.91	1913.94	2262.39	2706.61
ENSMUSG00000004069	Dnaja3	-0.448695	3.76e-17	1.34e-16	859.833	738.636	553.213	617.993
ENSMUSG00000004070	Hmox2	-0.349891	1.23e-14	4.06e-14	1108.73	1037.35	778.626	905.282
ENSMUSG00000004071	Cdip1	0.579361	2.22e-63	1.25e-62	1265.93	1389.29	1883.4	2084
ENSMUSG00000004085	Map3k20	0.898869	0.00205189	0.00369194	20.2454	8.68984	12.3854	41.5691
ENSMUSG00000004096	Cwc15	0.0688839	0.0190641	0.0296869	1970.95	1712.98	1726.52	2137.57
ENSMUSG00000004098	Col5a3	0.0366232	0.65314	0.670015	2.38181	4.34492	4.12845	2.77127
ENSMUSG00000004099	Dnmt1	0.0665924	2.81e-09	7.73e-09	15336.5	15586.3	15109.3	17274.3
ENSMUSG00000004100	Ppan	0.395965	1.65e-60	9.12e-60	3070.15	2840.49	3435.7	4341.66
ENSMUSG00000004105	Angptl2	-0.110441	0.248721	0.297661	101.227	68.4325	76.7892	80.3668
ENSMUSG00000004110	Cacna1e	0.119847	0.0752954	0.104496	319.162	275.902	311.285	335.324
ENSMUSG00000004113	Cacna1b	0.262872	0.170219	0.214778	36.918	16.2934	37.9818	25.8652
ENSMUSG00000004127	Trmt10a	0.995397	1.8e-56	9.76e-56	332.262	320.438	570.552	730.692
ENSMUSG00000004151	Etv1	-2.46069	0.0650289	0.0915214	2.38181	2.17246	0.82569	0
ENSMUSG00000004187	Kifc2	-2.15845	0.000663704	0.00126375	2.38181	14.121	0	3.69503
ENSMUSG00000004207	Psap	-0.237202	8.35e-31	3.73e-30	5355.49	4944.52	4148.27	4590.15
ENSMUSG00000004221	Ikbkg	-0.259011	2.29e-07	5.71e-07	784.806	897.225	640.736	764.871
ENSMUSG00000004233	Wars2	0.0690512	0.213443	0.261437	319.162	243.315	274.129	315.925
ENSMUSG00000004263	Atn1	0.354484	9.6e-16	3.28e-15	953.914	826.621	1078.35	1198.11
ENSMUSG00000004264	Phb2	0.176432	5.07e-12	1.54e-11	3048.71	2667.78	2999.73	3460.39
ENSMUSG00000004266	Ptpn6	-0.232985	2.3e-19	8.62e-19	3118.98	3318.43	2640.56	2836.86
ENSMUSG00000004267	Eno2	-1.66175	0.0668252	0.0936948	4.76361	1.08623	0	1.84751
ENSMUSG00000004268	Emg1	0.0454713	0.0351293	0.0520786	3197.58	3282.59	3051.75	3635.91
ENSMUSG00000004270	Lpcat3	0.042417	0.166194	0.210251	1069.43	1093.83	966.883	1260.93
ENSMUSG00000004285	Atp6v1f	0.102553	0.00861648	0.0142444	1128.98	1014.54	1101.47	1199.96
ENSMUSG00000004317	Clcn5	0.238325	3.29e-06	7.62e-06	654.997	678.893	689.451	884.035
ENSMUSG00000004319	Clcn3	0.0519411	0.022696	0.0348735	2954.63	3059.91	2849.46	3385.57
ENSMUSG00000004328	Hif3a	0.341123	0.484496	0.510643	0	3.25869	4.12845	0
ENSMUSG00000004347	Pde1c	-0.365772	0.369901	0.411224	1.1909	0	0	0.923757
ENSMUSG00000004356	Utp20	0.52372	4.25e-134	2.84e-133	3665.6	3529.16	5224.14	5119.46
ENSMUSG00000004359	Spic	11.079	0	0	0	0	2.47707	1.84751
ENSMUSG00000004364	Cul3	0.301958	1.44e-29	6.36e-29	2523.53	2480.95	2933.68	3235.92
ENSMUSG00000004371	Il11	0.350932	0.662513	0.678402	0	2.17246	0	2.77127
ENSMUSG00000004393	Ddx56	0.643427	2.11e-55	1.14e-54	975.35	839.655	1406.98	1428.13
ENSMUSG00000004394	Tmed4	-0.219979	0.00237045	0.00422877	396.571	322.61	276.606	340.866
ENSMUSG00000004415	Col26a1	2.24352	0.00625896	0.0105712	1.1909	1.08623	2.47707	8.31381
ENSMUSG00000004446	Bid	-0.0862567	0.0867908	0.118477	595.452	486.631	494.588	524.694
ENSMUSG00000004451	Ralb	0.33852	1.22e-06	2.91e-06	366.798	325.869	356.698	519.151
ENSMUSG00000004455	Ppp1cc	0.165574	2.48e-16	8.65e-16	4932.72	4315.59	4883.13	5489.89
ENSMUSG00000004460	Dnajb11	0.0867236	0.00192256	0.00346898	2287.73	2148.56	2294.59	2416.55
ENSMUSG00000004462	Tbccd1	0.0607617	0.182321	0.228328	460.88	437.75	422.753	514.533
ENSMUSG00000004473	Clec11a	0.361804	0.00317513	0.00556884	119.09	84.7259	143.67	118.241
ENSMUSG00000004500	Zfp324	-1.41171	1.71e-59	9.42e-59	353.698	393.215	132.936	147.801
ENSMUSG00000004508	Gab2	0.41577	4.82e-21	1.86e-20	846.733	886.363	1113.86	1198.11
ENSMUSG00000004530	Coro1c	0.609296	1.95e-127	1.29e-126	2566.4	2278.91	3463.77	3927.81
ENSMUSG00000004535	Tax1bp1	0.0584014	0.0020152	0.00363067	4542.11	5312.75	4643.68	5618.29
ENSMUSG00000004552	Ctse	0.0830472	9.34e-05	0.000193906	3815.66	4334.06	3631.39	5001.22
ENSMUSG00000004558	Ndrg2	2.52698	0.0178687	0.0279695	0	1.08623	1.65138	4.61878
ENSMUSG00000004561	Mettl17	-0.280809	0.00050967	0.000982403	273.908	335.645	247.707	254.033
ENSMUSG00000004562	Arhgef40	1.00619	0.000553964	0.00106341	19.0545	8.68984	36.3304	19.3989
ENSMUSG00000004565	Pnpla6	-0.0460673	0.267814	0.317141	394.189	446.44	346.79	467.421
ENSMUSG00000004567	Mcoln1	0.0957914	0.1204	0.157499	312.017	282.42	298.074	337.171
ENSMUSG00000004568	Arhgef18	-0.149856	2.69e-08	7.07e-08	2998.7	2685.16	2489.46	2633.63
ENSMUSG00000004591	Pkn2	0.566454	1.12e-70	6.52e-70	1657.74	1469.67	2243.4	2387.91
ENSMUSG00000004609	Cd33	8.69295	1	1	0	0	0.82569	0
ENSMUSG00000004610	Etfb	0.0128228	0.395967	0.435401	994.405	878.76	942.113	947.775
ENSMUSG00000004626	Stxbp2	-0.0667994	0.0628423	0.0888662	1127.79	1124.25	1045.32	1104.81
ENSMUSG00000004630	Pcp2	-1.12048	0.0827112	0.113455	11.909	1.08623	4.12845	1.84751
ENSMUSG00000004633	Chn2	-10.0864	0	0	0	2.17246	0	0
ENSMUSG00000004637	Wwox	0.228242	0.000634389	0.00121068	360.844	397.56	398.808	489.591
ENSMUSG00000004642	Slbp	0.34552	2.74e-63	1.54e-62	4046.69	4291.69	4975.61	5619.21
ENSMUSG00000004651	Tyr	0.261439	0.34264	0.387946	9.52723	0	4.95414	6.4663
ENSMUSG00000004661	Arid3b	1.1673	1.71262684987598e-311	1.28821650864107e-310	1177.8	1313.25	2633.13	2961.56
ENSMUSG00000004665	Cnn2	-0.370652	3.56e-11	1.06e-10	719.306	679.98	485.506	596.747
ENSMUSG00000004667	Polr2e	-0.392007	2.17e-17	7.74e-17	1083.72	1012.37	830.644	766.718
ENSMUSG00000004668	Abca13	-0.0398406	0.623783	0.640514	0	4.34492	3.30276	0.923757
ENSMUSG00000004677	Myo9b	0.143262	2.9e-09	7.98e-09	3249.98	3214.15	3350.65	3788.33
ENSMUSG00000004698	Hdac9	0.172141	5.37e-06	1.23e-05	922.95	1588.07	1051.93	1777.31
ENSMUSG00000004707	Ly9	-0.032816	0.137488	0.177432	2246.04	2397.31	1963.49	2575.43
ENSMUSG00000004709	Cd244a	-0.316849	0.0215335	0.0332864	89.3178	107.537	69.358	88.6807
ENSMUSG00000004730	Adgre1	8.69295	1	1	0	0	0.82569	0
ENSMUSG00000004748	Mtfp1	0.0102907	0.488895	0.514351	161.963	134.692	128.808	169.971
ENSMUSG00000004768	Rab23	0.315728	0.000297332	0.000587765	225.081	202.039	229.542	302.069
ENSMUSG00000004771	Rab11a	0.330491	6e-08	1.54e-07	491.843	434.492	529.267	635.545
ENSMUSG00000004788	Eif2b2	0.357881	3.3e-16	1.14e-15	993.214	802.724	1108.08	1193.49
ENSMUSG00000004789	Dlst	0.620143	3.44e-158	2.37e-157	2984.4	2812.25	4277.9	4631.72
ENSMUSG00000004791	Pgf	0.0812837	0.233389	0.282615	245.326	126.003	231.193	161.657
ENSMUSG00000004798	Ulk2	-0.0293556	0.337328	0.383708	454.925	467.079	388.9	514.533
ENSMUSG00000004815	Dgkq	0.194088	0.00922594	0.015179	260.808	299.799	285.689	355.646
ENSMUSG00000004837	Grap	0.928896	1.71e-134	1.14e-133	1024.18	864.639	1720.74	1875.23
ENSMUSG00000004842	Pou1f1	0.347362	0.288483	0.338371	2.38181	6.51738	5.77983	5.54254
ENSMUSG00000004843	Chmp2b	0.359159	1.1e-08	2.94e-08	427.534	433.406	502.02	602.289
ENSMUSG00000004846	Plod3	-0.18452	0.0103627	0.0168861	360.844	320.438	272.478	327.01
ENSMUSG00000004849	Ap1s1	-0.256377	5.79e-07	1.41e-06	845.542	761.447	658.075	687.275
ENSMUSG00000004864	Mapk13	11.1113	0	0	0	0	1.65138	2.77127
ENSMUSG00000004865	Srpk1	0.12511	3.51e-13	1.11e-12	6583.32	6352.27	6768.18	7339.25
ENSMUSG00000004880	Lbr	0.0948642	9.67e-08	2.46e-07	5871.16	6130.68	5837.63	6979.91
ENSMUSG00000004885	Crabp2	3.74011	9.57e-13	2.98e-12	0	2.17246	19.8166	9.23757
ENSMUSG00000004891	Nes	-0.430356	0.15295	0.195253	4.76361	22.8108	6.60552	13.8564
ENSMUSG00000004892	Bcan	9.6912	0	0	0	0	1.65138	0
ENSMUSG00000004895	Prcc	0.312666	4.12e-18	1.5e-17	1536.27	1188.33	1654.68	1729.27
ENSMUSG00000004896	Rrnad1	0.536151	1.09e-16	3.81e-16	423.962	342.162	516.056	594.899
ENSMUSG00000004897	Hdgf	0.109638	9.47e-13	2.95e-12	8688.83	7656.83	8564.06	9072.22
ENSMUSG00000004902	Slc25a18	2.31837	1.59e-152	1.09e-151	97.6541	73.8636	497.066	358.418
ENSMUSG00000004929	Thop1	-0.282599	0.000154428	0.000314307	408.48	325.869	275.781	327.934
ENSMUSG00000004931	Apba3	0.40947	1.42e-08	3.77e-08	331.071	300.886	329.45	509.914
ENSMUSG00000004933	Matk	1.49169	1.16e-72	6.8e-72	152.436	144.469	366.606	468.345
ENSMUSG00000004934	Pias4	-0.0771451	0.0949863	0.128238	645.47	577.874	541.653	617.993
ENSMUSG00000004936	Map2k1	-0.124728	0.00251412	0.00446316	1026.56	1174.21	831.47	1187.03
ENSMUSG00000004937	Sgta	0.130267	0.00208889	0.00375397	999.168	927.64	972.663	1136.22
ENSMUSG00000004939	Nmrk2	-0.23351	0.602975	0.619545	0	2.17246	0	1.84751
ENSMUSG00000004945	Tmem242	-0.490321	3.65e-14	1.19e-13	589.497	496.407	359.175	413.843
ENSMUSG00000004947	Dtx2	-0.539382	1.3e-23	5.27e-23	768.133	836.397	450.001	654.02
ENSMUSG00000004951	Hspb1	0.936946	0.118453	0.155595	1.1909	5.43115	9.90828	2.77127
ENSMUSG00000004952	Rasa4	0.239068	0.0251869	0.0383793	130.999	130.348	132.936	175.514
ENSMUSG00000004980	Hnrnpa2b1	-0.0849814	1.56e-45	7.91e-45	61866.3	55268.4	53129.9	57304.3
ENSMUSG00000004988	Fxyd4	0.731494	2.48e-07	6.16e-07	95.2723	45.6216	114.771	119.165
ENSMUSG00000004994	Ccdc130	-0.503618	2.52e-06	5.88e-06	185.781	197.694	133.762	136.716
ENSMUSG00000004996	Mri1	-0.38461	1.68e-09	4.66e-09	576.397	508.355	377.34	453.565
ENSMUSG00000005034	Prkacb	-0.125349	5.72e-05	0.000121075	2038.83	2024.73	1758.72	1966.68
ENSMUSG00000005045	Chd5	0.237069	0.205928	0.253312	23.8181	32.5869	31.3762	35.1028
ENSMUSG00000005054	Cstb	-0.106264	0.107486	0.142702	302.49	272.644	269.175	265.118
ENSMUSG00000005057	Sh2b2	13.9993	0	0	0	0	19.8166	12.9326
ENSMUSG00000005069	Pex5	0.352659	1.52e-07	3.83e-07	350.126	393.215	439.267	509.914
ENSMUSG00000005078	Jkamp	-0.108801	0.140669	0.181077	214.363	246.574	196.514	230.939
ENSMUSG00000005102	Eif2ak4	0.245035	5.84e-11	1.72e-10	1233.78	1341.49	1392.94	1659.07
ENSMUSG00000005103	Wdr1	0.675283	1.14e-251	8.35e-251	3845.43	3771.39	5644.42	6518.95
ENSMUSG00000005107	Slc2a9	-0.0863038	0.0900727	0.122532	516.852	551.805	484.68	521.923
ENSMUSG00000005124	Ccn4	10.8522	0	0	0	0	0	3.69503
ENSMUSG00000005125	Ndrg1	0.754535	8.87e-05	0.000184668	25.009	49.9666	62.7525	63.7392
ENSMUSG00000005131	4930550C14Rik	-1.95066	0.0136938	0.021881	10.7181	0	0	2.77127
ENSMUSG00000005142	Man2b1	0.137676	0.00018994	0.000383183	1442.18	1179.65	1404.5	1479.86
ENSMUSG00000005150	Wdr83	0.184239	0.00103249	0.00192707	490.652	586.564	606.882	617.07
ENSMUSG00000005161	Prdx2	-0.0659413	0.0471094	0.0682366	1369.54	1359.96	1184.04	1423.51
ENSMUSG00000005198	Polr2a	0.165391	1.25e-28	5.47e-28	9162.81	8008.77	8720.12	10537.3
ENSMUSG00000005204	Senp3	0.241581	8.09e-13	2.52e-12	1713.71	1475.1	1747.99	2022.1
ENSMUSG00000005220	Corin	1.96927	4.45e-09	1.21e-08	7.14542	6.51738	23.945	29.5602
ENSMUSG00000005225	Plekha8	-0.139343	0.0380111	0.0559759	358.462	338.904	292.294	340.866
ENSMUSG00000005233	Spc25	-0.0651277	0.0668261	0.0936948	1207.58	1046.04	1027.16	1126.98
ENSMUSG00000005251	Ripk4	1.76438	0.103549	0.138056	0	1.08623	0	3.69503
ENSMUSG00000005262	Ufd1	0.260859	5.5e-10	1.56e-09	1084.91	933.071	1139.45	1278.48
ENSMUSG00000005267	Zfp287	-0.733658	1.67e-10	4.83e-10	159.581	199.866	93.303	122.86
ENSMUSG00000005268	Prlr	-0.442228	0.233161	0.282481	9.52723	8.68984	11.5597	1.84751
ENSMUSG00000005299	Letm1	0.190665	2.34e-09	6.46e-09	1828.04	1780.33	1998.17	2120.02
ENSMUSG00000005312	Ubqln1	0.225944	5.89e-19	2.18e-18	2932.01	2790.52	3172.3	3520.44
ENSMUSG00000005320	Fgfr4	-0.878053	0.351254	0.395795	2.38181	2.17246	2.47707	0
ENSMUSG00000005338	Cadm3	-10.2191	0	0	2.38181	0	0	0
ENSMUSG00000005354	Txn2	0.0356059	0.119957	0.157242	2366.33	2097.51	2076.61	2498.76
ENSMUSG00000005362	Crbn	-0.0284682	0.34343	0.388731	572.825	416.026	462.387	507.143
ENSMUSG00000005364	Il5ra	1.66566	3.67e-20	1.4e-19	30.9635	26.0695	109.817	71.1293
ENSMUSG00000005370	Msh6	0.585912	3.67e-184	2.6e-183	3863.29	3836.56	5255.52	6301.87
ENSMUSG00000005371	Fbxo11	1.66097	0	0	1168.28	1228.53	3997.99	3581.41
ENSMUSG00000005374	Tbl2	-0.185727	7.78e-05	0.000162807	927.714	890.708	787.709	811.059
ENSMUSG00000005378	Bud23	0.070578	0.091618	0.124309	741.933	726.687	757.984	784.27
ENSMUSG00000005410	Mcm5	0.53897	1.34e-198	9.61e-198	5465.06	4583.89	7073.69	7526.77
ENSMUSG00000005413	Hmox1	0.983896	9.94e-11	2.9e-10	39.2998	69.5187	108.991	106.232
ENSMUSG00000005417	Mprip	-0.0163738	0.248499	0.297451	3692.99	3574.78	3345.7	3840.06
ENSMUSG00000005442	Cic	0.267398	1.58e-26	6.69e-26	3097.54	2676.47	3255.7	3694.1
ENSMUSG00000005447	Pafah1b3	-0.412702	3.09e-15	1.04e-14	863.405	770.137	626.699	600.442
ENSMUSG00000005465	Il27ra	-0.19179	0.0296601	0.0445885	257.235	172.71	175.046	201.379
ENSMUSG00000005469	Prkaca	-0.167624	0.00321077	0.00562521	600.215	543.115	451.653	566.263
ENSMUSG00000005470	Asf1b	0.0332818	0.133987	0.173298	2505.66	2124.66	2228.54	2509.85
ENSMUSG00000005474	Myl10	-0.256345	2.81e-81	1.7e-80	13583.4	10823.2	10135.3	10298
ENSMUSG00000005481	Ddx39	0.226388	2.39e-20	9.16e-20	3247.59	2901.32	3637.17	3556.46
ENSMUSG00000005483	Dnajb1	0.349177	2.75e-31	1.24e-30	1962.61	1922.63	2328.45	2620.7
ENSMUSG00000005493	Msh4	0.717468	0.00111185	0.00206598	36.918	20.6384	19.8166	74.8243
ENSMUSG00000005501	Usp40	-0.0194981	0.33421	0.380892	1002.74	1042.78	975.14	1042.92
ENSMUSG00000005505	Kbtbd4	-0.143252	0.0800278	0.110282	194.117	212.901	179.175	189.37
ENSMUSG00000005506	Celf1	-0.0258343	0.0931133	0.126089	5411.47	5553.89	5049.92	5720.83
ENSMUSG00000005510	Ndufs3	0.0109578	0.418848	0.454825	924.141	735.377	846.333	825.839
ENSMUSG00000005514	Por	-0.0240442	0.35095	0.395795	634.752	521.39	498.717	638.316
ENSMUSG00000005534	Insr	0.0728445	0.0224082	0.0345525	1620.82	1467.5	1467.25	1781
ENSMUSG00000005540	Fcer2a	1.12083	1.71e-06	4.04e-06	21.4363	20.6384	46.2387	45.2641
ENSMUSG00000005553	Atp4a	-0.882329	0.0147273	0.0234023	13.0999	23.897	9.90828	10.1613
ENSMUSG00000005566	Trim28	0.201878	2.53e-34	1.18e-33	7333.59	6437	7543.51	8295.34
ENSMUSG00000005575	Ube2m	0.041288	0.182871	0.228789	1192.09	878.76	1051.1	1079.87
ENSMUSG00000005580	Adcy9	-0.163353	0.486808	0.512743	7.14542	7.60361	5.77983	7.39006
ENSMUSG00000005583	Mef2c	0.110164	3.88e-08	1.01e-07	4301.54	5122.66	4358.82	5813.2
ENSMUSG00000005609	Ctr9	-0.234748	5.52e-11	1.63e-10	1668.46	1646.72	1222.02	1595.33
ENSMUSG00000005610	Eif4g2	0.228402	1.77e-108	1.14e-107	17497.9	17549.1	18956.2	22102.7
ENSMUSG00000005611	Mrvi1	-0.0739269	0.280781	0.330585	113.136	137.951	75.9635	162.581
ENSMUSG00000005615	Pcyt1a	0.764896	3.22e-34	1.49e-33	344.171	387.784	572.203	671.571
ENSMUSG00000005621	Zfp592	0.0584439	0.0129335	0.0207558	3132.08	2826.37	2855.24	3349.54
ENSMUSG00000005625	Psmd4	0.0722013	0.0195167	0.0303442	1739.91	1593.5	1658.81	1845.67
ENSMUSG00000005628	Tmod4	0.483384	0.223128	0.271813	2.38181	10.8623	7.43121	11.0851
ENSMUSG00000005640	Insrr	0.391552	0.13006	0.168729	20.2454	15.2072	20.6423	25.8652
ENSMUSG00000005656	Snx6	-0.168358	0.0001661	0.000337209	967.014	1000.42	760.461	990.267
ENSMUSG00000005667	Mthfd2	0.443442	5.51e-64	3.11e-63	2305.59	2581.97	3112.03	3534.29
ENSMUSG00000005672	Kit	8.69295	1	1	0	0	0.82569	0
ENSMUSG00000005674	Tomm40l	0.442155	0.00352496	0.0061438	83.3633	44.5354	92.4773	81.2906
ENSMUSG00000005677	Nr1i3	1.34961	0.419064	0.454825	0	1.08623	0	2.77127
ENSMUSG00000005682	Pan2	0.113974	0.0158562	0.0250844	753.842	671.29	726.607	815.677
ENSMUSG00000005683	Cs	0.0513807	0.0180953	0.0282965	3452.43	3290.19	3315.15	3671.93
ENSMUSG00000005686	Ampd3	0.17293	0.236156	0.285058	46.4452	26.0695	27.2478	54.5017
ENSMUSG00000005687	Bcas2	0.251239	1.6e-10	4.62e-10	1212.34	1105.78	1230.28	1528.82
ENSMUSG00000005696	Sh2d1a	-9.08777	0	0	0	1.08623	0	0
ENSMUSG00000005698	Ctcf	-0.0513472	0.00254909	0.00452316	6383.24	6180.65	5628.73	6495.86
ENSMUSG00000005699	Pard6a	0.0785557	0.298066	0.346592	123.854	111.882	97.4315	151.496
ENSMUSG00000005705	Agrp	-0.470323	0.151661	0.193763	10.7181	15.2072	5.77983	12.9326
ENSMUSG00000005718	Tfap4	-0.407162	3.62e-19	1.35e-18	1202.81	962.399	742.296	890.502
ENSMUSG00000005732	Ranbp1	-0.0135535	0.214408	0.262436	7752.78	6749.83	6915.98	7451.02
ENSMUSG00000005763	Cd247	1.18052	1.54e-06	3.65e-06	9.52723	27.1557	38.8074	44.3403
ENSMUSG00000005774	Rfx5	0.692351	2.15e-30	9.55e-30	385.853	431.233	627.525	692.818
ENSMUSG00000005779	Psmb4	0.251087	2.62e-16	9.11e-16	2037.64	1823.78	2335.05	2260.43
ENSMUSG00000005802	Slc30a4	-0.0489925	0.20368	0.250883	608.552	651.738	515.231	702.979
ENSMUSG00000005803	Sqor	-9.22026	0	0	1.1909	0	0	0
ENSMUSG00000005804	Bloc1s6	-0.120905	0.0111646	0.0181148	769.324	778.826	589.543	834.152
ENSMUSG00000005813	Metap1	0.552414	1.24e-47	6.42e-47	1081.34	1123.16	1471.38	1761.6
ENSMUSG00000005823	Gpr108	-0.308351	0.000126487	0.000259968	326.308	300.886	254.313	252.186
ENSMUSG00000005846	Rsl1d1	0.388118	2.23e-61	1.24e-60	3217.82	3049.05	3972.4	4228.96
ENSMUSG00000005871	Apc	0.136221	1.92e-09	5.31e-09	3609.63	3709.47	3945.15	4098.71
ENSMUSG00000005873	Reep5	0.0780949	0.0319915	0.0478134	1276.65	1029.75	1161.75	1272.94
ENSMUSG00000005881	Ergic3	-0.0767838	0.0842703	0.115351	671.67	687.583	566.424	722.378
ENSMUSG00000005882	Uqcc1	-0.234373	0.000148801	0.0003034	534.716	527.907	436.79	466.497
ENSMUSG00000005883	Spo11	-0.372122	0.00616205	0.0104194	104.8	109.709	51.1928	114.546
ENSMUSG00000005886	Ncoa2	0.2414	6.68e-28	2.88e-27	3818.04	3763.78	4219.28	4743.49
ENSMUSG00000005893	Nr2c2	0.319121	5.05e-30	2.24e-29	2242.47	2285.43	2612.48	3036.39
ENSMUSG00000005897	Nr2c1	0.291712	0.00901491	0.0148495	132.19	107.537	111.468	181.98
ENSMUSG00000005899	Smpd4	0.517952	1.14e-79	6.83e-79	2261.53	2069.27	3070.74	3130.61
ENSMUSG00000005907	Pex1	0.0545684	0.203506	0.250717	462.071	469.251	435.139	532.084
ENSMUSG00000005936	Kctd20	0.146323	2.48e-05	5.43e-05	1594.62	1416.44	1644.78	1687.7
ENSMUSG00000005947	Itgae	0.782741	1.25e-08	3.33e-08	73.836	73.8636	123.854	130.25
ENSMUSG00000005949	Ctns	0.329	0.0104916	0.0170847	80.9815	98.8469	89.1746	136.716
ENSMUSG00000005950	P2rx5	1.09605	3.16e-13	1e-12	51.2089	56.4839	91.6516	138.564
ENSMUSG00000005951	Shpk	-1.07871	0.00358263	0.00623809	20.2454	16.2934	9.90828	7.39006
ENSMUSG00000005958	Ephb3	8.85449	1	1	0	0	0	0.923757
ENSMUSG00000005968	Tuft1	1.09803	1.65e-14	5.45e-14	64.3088	54.3115	109.817	144.106
ENSMUSG00000005973	Rcn1	0.161855	0.000974395	0.00182253	703.824	719.084	760.461	831.381
ENSMUSG00000005980	Dnase1	0.0146802	0.426197	0.460696	333.453	293.282	307.982	325.162
ENSMUSG00000005981	Trap1	-0.0721694	0.0056535	0.0095966	2681.92	2539.6	2281.38	2685.36
ENSMUSG00000005982	Naa60	0.245377	1.3e-06	3.09e-06	732.406	637.617	808.351	815.677
ENSMUSG00000005983	1700037C18Rik	0.787479	3.44e-10	9.83e-10	100.036	77.1223	170.918	134.869
ENSMUSG00000005986	Ankrd13d	0.224891	0.00460184	0.00789918	307.253	206.384	304.68	295.602
ENSMUSG00000006005	Tpr	-0.08262	5.5e-11	1.62e-10	13121.4	12743.6	11422.6	13002.8
ENSMUSG00000006010	Odr4	-0.083033	0.105298	0.140194	444.207	556.149	448.35	496.057
ENSMUSG00000006014	Prg4	1.25663	3.85e-07	9.46e-07	15.4817	21.7246	21.4679	67.4343
ENSMUSG00000006019	Dhx34	-0.541519	3.64e-11	1.08e-10	322.735	366.059	215.505	257.728
ENSMUSG00000006021	Kptn	0.102305	0.18317	0.229078	178.636	135.779	137.065	200.455
ENSMUSG00000006024	Napa	0.507834	4.24e-41	2.08e-40	1170.66	1107.95	1513.49	1726.5
ENSMUSG00000006050	Sra1	0.177601	0.00695031	0.0116734	373.944	378.008	368.258	482.201
ENSMUSG00000006057	Atp5g1	0.0382379	0.14495	0.186052	1832.8	1420.79	1752.11	1588.86
ENSMUSG00000006058	Snf8	0.0203884	0.331674	0.379641	1074.2	1030.83	978.443	1156.54
ENSMUSG00000006095	Tbcb	-0.363325	1.09e-06	2.62e-06	454.925	323.696	317.065	288.212
ENSMUSG00000006127	Inpp5k	0.081451	0.0499821	0.072067	913.423	746.24	777.8	978.259
ENSMUSG00000006134	Crkl	0.345647	1.59e-33	7.31e-33	2166.25	2109.46	2576.98	2856.26
ENSMUSG00000006143	Upk3bl	1.81586	0.00243754	0.00433761	2.38181	2.17246	4.95414	11.0851
ENSMUSG00000006154	Eps8l1	0.789299	0.000340653	0.00066969	36.918	17.3797	42.1102	51.7304
ENSMUSG00000006169	Clint1	0.184257	6.55e-13	2.05e-12	2859.36	2810.08	3006.34	3435.45
ENSMUSG00000006179	Prss16	-0.788765	0.00226727	0.00405748	26.1999	36.9318	18.9909	17.5514
ENSMUSG00000006191	Cdkal1	0.30273	9.59e-13	2.98e-12	988.45	975.434	1187.34	1235.06
ENSMUSG00000006215	Zbtb17	0.800214	4.49e-76	2.66e-75	828.869	682.152	1179.09	1452.15
ENSMUSG00000006219	Fblim1	9.85293	0	0	0	0	0	1.84751
ENSMUSG00000006221	Hspb7	-10.8036	0	0	3.57271	0	0	0
ENSMUSG00000006235	Epor	-0.561574	0.106615	0.141708	9.52723	16.2934	8.2569	9.23757
ENSMUSG00000006262	Mob1b	0.510618	3.51e-61	1.95e-60	1723.24	1680.4	2245.88	2603.15
ENSMUSG00000006269	Atp6v1b1	-0.460106	0.213458	0.26144	9.52723	10.8623	7.43121	7.39006
ENSMUSG00000006273	Atp6v1b2	0.0438805	0.155476	0.198203	1148.03	1128.59	1107.25	1239.68
ENSMUSG00000006276	Eps15l1	0.133555	1.42e-05	3.17e-05	2121	1729.28	1965.14	2258.59
ENSMUSG00000006281	Tep1	-0.184734	2.98e-05	6.48e-05	1076.58	1000.42	846.333	981.03
ENSMUSG00000006288	Ttc5	0.000290657	0.498276	0.522166	912.232	1030.83	903.305	1040.15
ENSMUSG00000006289	Osgep	-0.231395	2.42e-07	6.02e-07	1069.43	1016.71	889.268	887.73
ENSMUSG00000006299	Aamp	0.483089	7.12e-35	3.32e-34	1099.2	1042.78	1376.43	1617.5
ENSMUSG00000006301	Tmbim1	0.709205	3.99e-47	2.05e-46	607.361	616.978	926.425	1075.25
ENSMUSG00000006304	Arpc2	0.119143	6.09e-10	1.72e-09	5347.16	4940.17	5155.61	6017.35
ENSMUSG00000006307	Kmt2b	0.17719	1.26e-09	3.51e-09	2246.04	2094.25	2274.78	2632.71
ENSMUSG00000006310	Zbtb32	-0.436689	4.58e-14	1.49e-13	663.333	683.238	388.9	605.985
ENSMUSG00000006313	Upk1a	0.893364	0.00885473	0.0145982	14.2908	7.60361	23.1193	17.5514
ENSMUSG00000006315	Tmem147	-0.368226	2.07e-07	5.17e-07	500.18	355.197	323.671	339.019
ENSMUSG00000006333	Rps9	0.0310168	0.00392727	0.00680067	15747.3	14408.8	14641.1	16170.4
ENSMUSG00000006335	Tfpt	-0.0323826	0.341291	0.38665	402.525	349.766	347.616	387.978
ENSMUSG00000006342	Susd2	2.25096	5.38e-08	1.39e-07	4.76361	3.25869	20.6423	17.5514
ENSMUSG00000006345	Ggt1	2.27705	0.0226684	0.0348383	1.1909	0	5.77983	0
ENSMUSG00000006356	Crip2	0.500022	0.0641364	0.09053	16.6727	17.3797	22.2936	25.8652
ENSMUSG00000006360	Crip1	-0.241181	4.21e-48	2.18e-47	8132.68	7825.2	6334.7	7166.51
ENSMUSG00000006362	Cbfa2t3	-0.221211	9.14e-06	2.06e-05	912.232	750.584	714.222	712.217
ENSMUSG00000006373	Pgrmc1	0.209192	6.03e-05	0.000127503	595.452	691.928	683.672	804.592
ENSMUSG00000006378	Gcat	0.267548	0.0216893	0.0335111	101.227	112.968	131.285	126.555
ENSMUSG00000006386	Tek	2.27148	0.0051607	0.00880199	0	2.17246	4.95414	5.54254
ENSMUSG00000006390	Elovl1	0.17356	0.000135097	0.000276947	933.669	766.878	892.571	1025.37
ENSMUSG00000006392	Med8	-0.30533	6.88e-08	1.77e-07	715.733	613.72	500.368	575.501
ENSMUSG00000006398	Cdc20	-0.479505	5.14e-47	2.64e-46	2274.63	1885.69	1453.21	1530.67
ENSMUSG00000006403	Adamts4	11.4369	0	0	0	0	0	5.54254
ENSMUSG00000006411	Nectin4	0.930735	2.12e-05	4.66e-05	29.7726	23.897	33.0276	69.2818
ENSMUSG00000006412	Pfdn2	0.12345	0.00212057	0.00380768	1161.13	976.52	1136.98	1191.65
ENSMUSG00000006418	Rnf114	0.126048	0.00457292	0.00785233	874.123	821.189	818.259	1031.84
ENSMUSG00000006423	C330007P06Rik	0.223987	7.39e-10	2.08e-09	1339.77	1392.55	1566.33	1624.89
ENSMUSG00000006435	Neurl1a	1.89353	1.04e-09	2.92e-09	14.2908	2.17246	37.1561	24.0177
ENSMUSG00000006442	Srm	0.373072	3.31e-32	1.5e-31	1951.89	1520.72	2250.83	2246.58
ENSMUSG00000006445	Epha2	1.73501	0	0	3864.48	2953.46	11543.2	11152.5
ENSMUSG00000006456	Rbm14	0.267697	6.39e-21	2.47e-20	2392.53	2061.66	2598.45	2763.88
ENSMUSG00000006457	Actn3	0.957941	0.0159055	0.0251541	7.14542	8.68984	13.211	17.5514
ENSMUSG00000006462	A530013C23Rik	-10.0864	0	0	0	2.17246	0	0
ENSMUSG00000006463	Zdhhc24	-0.279894	0.00239088	0.00425851	219.126	245.488	192.386	190.294
ENSMUSG00000006464	Bbs1	0.746443	2.4e-05	5.25e-05	48.8271	42.3629	65.2295	87.7569
ENSMUSG00000006469	Slc34a3	-9.22026	0	0	1.1909	0	0	0
ENSMUSG00000006471	Ndor1	-0.131073	0.00253419	0.00449754	1018.22	978.693	832.296	991.191
ENSMUSG00000006476	Nsmf	-0.108599	0.20194	0.248964	134.572	152.072	133.762	132.097
ENSMUSG00000006494	Pdk1	-0.429997	1.1e-60	6.11e-60	2896.28	3769.22	1929.64	3017.91
ENSMUSG00000006498	Ptbp1	0.370676	5.88e-105	3.78e-104	6229.62	5806.98	7355.25	8207.58
ENSMUSG00000006517	Mvd	-0.469741	5.62e-08	1.45e-07	328.689	262.868	198.991	228.168
ENSMUSG00000006519	Cyba	0.857777	2.54e-68	1.46e-67	680.006	468.165	1084.96	995.81
ENSMUSG00000006522	Itih3	1.20092	0.106526	0.141623	3.57271	0	0.82569	7.39006
ENSMUSG00000006526	Stimate	0.161474	0.0197443	0.0306685	312.017	315.007	286.515	414.767
ENSMUSG00000006527	Sfmbt1	0.636853	6.38e-71	3.71e-70	1251.64	1152.49	1875.97	1862.29
ENSMUSG00000006538	Ihh	-1.7912	0.00204044	0.00367272	1.1909	14.121	1.65138	2.77127
ENSMUSG00000006542	Prkag3	-0.631744	0.174585	0.219683	4.76361	4.34492	4.95414	0.923757
ENSMUSG00000006567	Atp7b	1.10213	0.224252	0.272923	0	3.25869	3.30276	3.69503
ENSMUSG00000006575	Rundc3a	0.587147	0.00261288	0.0046308	40.4907	35.8456	61.1011	53.5779
ENSMUSG00000006576	Slc4a3	-12.1698	0	0	5.95452	3.25869	0	0
ENSMUSG00000006585	Cdt1	0.950095	7.37e-306	5.52e-305	2197.22	1906.33	3885.7	4042.36
ENSMUSG00000006586	Runx1t1	-1.31889	0.0278933	0.0421696	4.76361	6.51738	0.82569	3.69503
ENSMUSG00000006587	Snai3	11.275	0	0	0	0	4.95414	0
ENSMUSG00000006589	Aprt	0.579287	1.34e-36	6.37e-36	814.578	683.238	1084.13	1153.77
ENSMUSG00000006599	Gtf2h1	0.431725	9.62e-34	4.43e-33	1429.08	1228.53	1652.21	1932.5
ENSMUSG00000006611	Hfe	-0.316238	0.0978639	0.13156	42.8725	34.7593	27.2478	35.1028
ENSMUSG00000006641	Slc5a6	0.393489	2.32e-06	5.44e-06	269.144	209.642	304.68	324.239
ENSMUSG00000006649	Nphs1	0.0199087	0.548048	0.567835	2.38181	5.43115	3.30276	4.61878
ENSMUSG00000006673	Qrich1	0.425688	7.36e-83	4.47e-82	3496.49	3482.45	4433.96	4940.25
ENSMUSG00000006675	P4htm	0.0519658	0.436473	0.469958	19.0545	22.8108	15.6881	27.7127
ENSMUSG00000006676	Usp19	0.264227	7.57e-20	2.87e-19	2194.84	2121.41	2382.94	2800.83
ENSMUSG00000006678	Pola1	0.140656	5.45e-12	1.66e-11	4420.63	4697.94	4642.86	5409.52
ENSMUSG00000006699	Cdc42	0.299736	4.58e-45	2.31e-44	3895.45	4046.2	4749.37	5026.16
ENSMUSG00000006705	Pknox1	0.26308	2.52e-07	6.27e-07	739.551	615.892	732.387	894.197
ENSMUSG00000006711	D130043K22Rik	0.901608	0.172283	0.217141	4.76361	1.08623	9.08259	1.84751
ENSMUSG00000006715	Gmnn	0.266965	4.4e-19	1.63e-18	2123.38	1925.88	2329.27	2543.1
ENSMUSG00000006717	Acot13	-0.84004	2.54e-20	9.72e-20	282.244	318.265	154.404	181.056
ENSMUSG00000006720	Zfp184	1.09154	1.15e-16	4.03e-16	53.5907	85.8121	135.413	161.657
ENSMUSG00000006724	Cyp27b1	1.54743	2.15e-12	6.63e-12	28.5817	11.9485	60.2754	58.1967
ENSMUSG00000006728	Cdk4	0.0822347	9.18e-05	0.000190696	4430.16	3855.03	4113.59	4657.58
ENSMUSG00000006731	B4galnt1	0.117866	0.00162059	0.00295288	1265.93	1220.92	1288.9	1409.65
ENSMUSG00000006732	Mettl1	0.0187046	0.393067	0.432707	572.825	432.319	495.414	522.846
ENSMUSG00000006736	Tspan31	0.00283417	0.479085	0.505978	920.569	1051.47	871.103	1104.81
ENSMUSG00000006740	Kif5b	0.24326	1.44e-39	7e-39	5340.01	5463.73	6047.36	6740.65
ENSMUSG00000006763	Saal1	0.106293	0.0293287	0.0441558	628.797	616.978	655.598	685.428
ENSMUSG00000006782	Cnp	-0.650876	2.86e-75	1.69e-74	2072.17	1739.05	1207.98	1219.36
ENSMUSG00000006784	Ttc25	-0.182078	0.0109704	0.0178251	406.098	276.988	242.753	359.341
ENSMUSG00000006800	Sulf2	0.890114	0.0910611	0.123632	0	7.60361	5.77983	8.31381
ENSMUSG00000006818	Sod2	0.234899	1.14e-16	3.99e-16	2305.59	2253.93	2530.74	2835.01
ENSMUSG00000006850	Tmco6	-0.312595	0.00105898	0.00197364	264.381	182.487	159.358	200.455
ENSMUSG00000006906	Stambp	-0.367931	1.15e-07	2.92e-07	502.561	399.732	296.423	402.758
ENSMUSG00000006920	Ezh1	-0.325074	6.2e-07	1.51e-06	459.689	537.684	312.111	484.049
ENSMUSG00000006930	Hap1	-10.2191	0	0	2.38181	0	0	0
ENSMUSG00000006931	P3h4	11.0121	0	0	0	0	4.12845	0
ENSMUSG00000006932	Ctnnb1	0.0987498	3.8e-07	9.35e-07	5076.82	4942.34	4623.87	6105.11
ENSMUSG00000006941	Eif1b	-0.298814	7.65e-07	1.85e-06	591.879	565.926	444.221	496.981
ENSMUSG00000006958	Chrd	1.16517	0.448687	0.478798	1.1909	0	0.82569	1.84751
ENSMUSG00000006998	Psmd2	-0.0611396	0.000194998	0.000392687	7207.35	7073.53	6501.49	7186.83
ENSMUSG00000007021	Syngr3	1.6389	0.0286848	0.0432846	1.1909	1.08623	2.47707	4.61878
ENSMUSG00000007029	Vars	0.694868	0	0	7575.34	6846.5	11262.4	12082.7
ENSMUSG00000007030	Vwa7	0.762588	0.000112164	0.000231492	32.1544	35.8456	55.3213	60.0442
ENSMUSG00000007033	Hspa1l	0.918875	0.000287804	0.000570043	21.4363	16.2934	37.1561	34.179
ENSMUSG00000007034	Slc44a4	13.7244	0	0	0	0	13.211	13.8564
ENSMUSG00000007035	Msh5	0.697618	5.51e-19	2.04e-18	253.662	230.281	368.258	416.614
ENSMUSG00000007036	Abhd16a	0.10982	0.0614527	0.0870482	419.198	375.835	398.808	459.107
ENSMUSG00000007038	Neu1	0.734244	1.21e-46	6.18e-46	587.116	531.166	880.186	980.106
ENSMUSG00000007039	Ddah2	0.464704	8.2e-08	2.09e-07	233.417	192.263	249.358	338.095
ENSMUSG00000007041	Clic1	-0.0451688	0.0240618	0.0368135	4555.21	3583.47	3680.1	4207.71
ENSMUSG00000007050	Lsm2	0.252098	2.2e-08	5.79e-08	937.241	817.931	934.681	1155.62
ENSMUSG00000007080	Pole	0.449925	1e-100	6.37e-100	3784.69	3760.53	4906.25	5400.28
ENSMUSG00000007097	Atp1a2	0.661597	0.0642486	0.0906684	8.33633	10.8623	16.5138	13.8564
ENSMUSG00000007107	Atp1a4	-10.7165	0	0	1.1909	2.17246	0	0
ENSMUSG00000007122	Casq1	2.76291	3.51e-05	7.56e-05	2.38181	0	11.5597	4.61878
ENSMUSG00000007207	Stx1a	0.352734	0.000461867	0.000894499	195.308	114.054	220.459	174.59
ENSMUSG00000007209	Ceacam9	0.62677	0.0476858	0.0690092	9.52723	15.2072	20.6423	17.5514
ENSMUSG00000007216	Zfp775	-1.17664	4.56e-41	2.23e-40	348.935	347.593	112.294	195.836
ENSMUSG00000007279	Scube2	-11.1536	0	0	2.38181	2.17246	0	0
ENSMUSG00000007338	Mrpl49	-0.0635342	0.122551	0.160011	799.096	657.169	664.681	728.844
ENSMUSG00000007379	Dennd2c	9.85293	0	0	0	0	0	1.84751
ENSMUSG00000007411	Mark3	0.0864114	0.00237845	0.00423912	2207.94	2090.99	2131.11	2433.18
ENSMUSG00000007415	Gatad1	-0.0722912	0.0320806	0.0479355	1461.24	1328.46	1226.15	1427.2
ENSMUSG00000007458	M6pr	0.279655	4.98e-23	2e-22	2165.06	2337.57	2575.33	2890.44
ENSMUSG00000007476	Lrrc8a	0.684499	1.55e-54	8.35e-54	838.396	709.308	1114.68	1372.7
ENSMUSG00000007480	Mc5r	12.18	0	0	0	0	7.43121	1.84751
ENSMUSG00000007564	Ppp2r1a	0.504845	1.17e-100	7.42e-100	2926.05	2904.58	3839.46	4434.03
ENSMUSG00000007570	Fance	-0.205938	0.00426464	0.00734591	415.625	315.007	305.505	327.934
ENSMUSG00000007589	Tinf2	0.0473309	0.20789	0.255415	734.788	564.839	654.772	688.199
ENSMUSG00000007591	Tssk4	-0.363631	0.0415793	0.0608489	70.2633	44.5354	42.1102	47.1116
ENSMUSG00000007603	Dus3l	0.460309	1.86e-20	7.13e-20	693.106	648.479	784.406	1061.4
ENSMUSG00000007610	Gtpbp3	-0.142731	0.0260528	0.0395891	439.443	374.749	339.359	398.139
ENSMUSG00000007613	Tgfbr1	0.736589	3.03e-69	1.75e-68	834.824	837.483	1295.51	1490.94
ENSMUSG00000007617	Homer1	0.422052	2.42e-23	9.74e-23	896.751	977.606	1193.12	1318.2
ENSMUSG00000007646	Rad51c	0.034433	0.344047	0.389338	265.572	282.42	221.285	339.943
ENSMUSG00000007655	Cav1	8.69295	1	1	0	0	0.82569	0
ENSMUSG00000007656	Arpp19	0.160277	1.24e-09	3.46e-09	2805.77	2537.43	2886.61	3084.42
ENSMUSG00000007659	Bcl2l1	1.61194	0	0	2661.67	1792.28	7212.4	6401.64
ENSMUSG00000007670	Khsrp	0.270996	3.98e-61	2.21e-60	7056.1	6479.36	7618.64	8713.8
ENSMUSG00000007682	Dio2	-0.0367889	0.312016	0.360549	432.298	300.886	360.001	354.723
ENSMUSG00000007721	Ccdc124	-0.30674	7.36e-15	2.45e-14	1518.4	1295.87	1080.83	1194.42
ENSMUSG00000007739	Cct4	0.145688	5.87e-11	1.73e-10	3890.68	3725.77	3941.85	4483.92
ENSMUSG00000007777	0610009B22Rik	0.0244563	0.469829	0.497637	94.0814	73.8636	78.4406	92.3757
ENSMUSG00000007783	Cpt1c	1.21778	0.00848702	0.0140412	9.52723	1.08623	9.90828	14.7801
ENSMUSG00000007812	Zfp655	0.848058	3.13e-107	2.02e-106	1024.18	848.345	1556.43	1814.26
ENSMUSG00000007815	Rhoa	0.0728639	0.000767605	0.00145225	3890.68	3769.22	3743.68	4313.02
ENSMUSG00000007817	Zmiz1	0.15643	9.07e-25	3.73e-24	8573.32	7940.34	8275.89	10129
ENSMUSG00000007827	Ankrd26	0.0233496	0.262309	0.311292	1507.68	1569.6	1457.34	1670.15
ENSMUSG00000007833	Aldh16a1	0.0734865	0.136298	0.176038	519.234	418.198	491.286	495.134
ENSMUSG00000007836	Hnrnpa0	0.299573	4.9e-79	2.93e-78	7308.58	6934.49	8532.68	8997.39
ENSMUSG00000007837	Prrg2	0.479205	0.0040268	0.00696364	55.9725	52.139	61.1011	89.6044
ENSMUSG00000007850	Hnrnph1	0.160476	1.17e-65	6.65e-65	21688.7	22073.3	22533.9	26377
ENSMUSG00000007867	Ift43	0.375904	0.104036	0.138666	11.909	34.7593	18.9909	41.5691
ENSMUSG00000007872	Id3	-1.13731	1.48e-213	1.07e-212	2309.16	1693.43	927.25	892.349
ENSMUSG00000007877	Tcap	-0.211406	0.462865	0.4916	4.76361	1.08623	4.12845	0.923757
ENSMUSG00000007880	Arid1a	0.312899	1.3e-115	8.49e-115	10234.6	8908.17	11426.7	12352.5
ENSMUSG00000007888	Crlf1	-0.843462	0.0728447	0.101373	3.57271	11.9485	4.95414	3.69503
ENSMUSG00000007891	Ctsd	0.0606505	0.164945	0.20885	597.834	448.613	502.02	589.357
ENSMUSG00000007892	Rplp1	0.0547204	0.000135108	0.000276947	10177.5	7877.34	9484.7	9268.05
ENSMUSG00000007907	Cabs1	-10.2191	0	0	2.38181	0	0	0
ENSMUSG00000007908	Hmgcll1	-0.168098	0.00250341	0.00444661	595.452	628.927	461.561	628.155
ENSMUSG00000007944	Ttc9b	1.68831	0.0100272	0.0163866	3.57271	0	4.12845	7.39006
ENSMUSG00000007946	Phox2a	0.345003	0.467757	0.495687	5.95452	1.08623	2.47707	6.4663
ENSMUSG00000007950	Abhd8	-0.424633	2.77e-06	6.46e-06	273.908	258.523	198.991	197.684
ENSMUSG00000007987	Ift22	-0.313663	2.23e-07	5.56e-07	549.007	608.288	427.708	503.448
ENSMUSG00000007989	Fzd3	10.8522	0	0	0	0	0	3.69503
ENSMUSG00000008028	1700008O03Rik	-0.342457	0.30808	0.356599	10.7181	5.43115	1.65138	11.0851
ENSMUSG00000008035	Mid1ip1	0.314694	1.13e-14	3.73e-14	1058.71	1056.9	1264.13	1367.16
ENSMUSG00000008036	Ap2s1	-0.247398	6.88e-09	1.86e-08	1276.65	1042.78	939.636	1014.29
ENSMUSG00000008090	Fgfrl1	0.541132	0.00131109	0.00241962	61.927	41.2767	57.7983	92.3757
ENSMUSG00000008129	4930432K21Rik	0.271975	0.00328575	0.00574506	186.972	185.745	216.331	233.71
ENSMUSG00000008136	Fhl2	-0.233627	0.55115	0.57065	0	4.34492	0	3.69503
ENSMUSG00000008140	Emc10	-0.128362	0.00472922	0.00810627	983.686	786.43	792.663	826.762
ENSMUSG00000008167	Fbxw9	0.799707	1.36e-08	3.62e-08	72.6451	66.26	126.331	115.47
ENSMUSG00000008193	Spib	0.616653	1.73e-132	1.16e-131	2661.67	2240.89	3806.43	3710.73
ENSMUSG00000008200	Fnbp4	0.409087	4.28e-80	2.57e-79	3672.75	3685.58	4751.02	5019.69
ENSMUSG00000008206	Cers4	0.457925	4.55e-26	1.91e-25	889.605	883.104	1058.53	1376.4
ENSMUSG00000008226	Scrn3	-0.800358	1.21e-13	3.86e-13	181.017	236.798	118.899	121.012
ENSMUSG00000008301	Phax	-0.0212747	0.324679	0.372605	984.877	980.865	973.489	963.478
ENSMUSG00000008305	Tle1	0.210766	0.000792233	0.0014962	408.48	456.216	440.919	559.797
ENSMUSG00000008307	1700109H08Rik	1.12326	5.81e-43	2.89e-42	219.126	143.382	366.606	423.081
ENSMUSG00000008318	Relt	-0.251858	1.74e-09	4.83e-09	1320.71	1111.21	933.856	1108.51
ENSMUSG00000008333	Snrpb2	0.142491	4.97e-05	0.000105801	1535.07	1368.65	1487.89	1717.26
ENSMUSG00000008348	Ubc	0.63991	9.4e-202	6.74e-201	3683.47	3216.33	4924.42	5827.06
ENSMUSG00000008373	Prpf31	-0.158145	7.91e-08	2.02e-07	2449.69	2314.75	2145.14	2124.64
ENSMUSG00000008384	Sertad1	0.4396	4.08e-14	1.33e-13	490.652	489.889	563.121	766.718
ENSMUSG00000008393	Carhsp1	1.2237	4.94065645841247e-323	3.70549234380935e-322	1200.43	1086.23	2658.72	2681.67
ENSMUSG00000008398	Elk3	-0.488468	5.09e-28	2.2e-27	1290.94	1028.66	786.883	866.484
ENSMUSG00000008429	Herpud2	0.288659	1.98e-08	5.23e-08	707.397	613.72	731.562	882.188
ENSMUSG00000008435	Rdh13	0.388161	5.35e-09	1.45e-08	440.634	322.61	479.726	519.151
ENSMUSG00000008438	Adam21	0.107163	0.388186	0.428279	22.6272	6.51738	15.6881	15.7039
ENSMUSG00000008450	Nutf2	-0.00797955	0.424611	0.459576	1169.47	1103.61	1056.88	1203.66
ENSMUSG00000008461	Fut1	11.5689	0	0	0	0	3.30276	2.77127
ENSMUSG00000008475	Arpc5	-0.045678	0.0161143	0.025453	4240.81	4992.31	4171.39	4773.98
ENSMUSG00000008482	Rnf151	-0.934896	0.101682	0.136056	9.52723	5.43115	4.12845	3.69503
ENSMUSG00000008489	Elavl2	8.69295	1	1	0	0	0.82569	0
ENSMUSG00000008496	Pou2f2	-0.377807	1.7e-18	6.23e-18	1174.23	1238.3	824.865	1031.84
ENSMUSG00000008575	Nfib	9.6912	0	0	0	0	1.65138	0
ENSMUSG00000008601	Rab25	0.279848	0.383565	0.42421	5.95452	2.17246	2.47707	7.39006
ENSMUSG00000008604	Ubqln4	0.34123	5.23e-22	2.06e-21	1481.48	1323.03	1702.57	1850.29
ENSMUSG00000008668	Rps18	-0.0323695	0.00227129	0.00406393	16714.3	15504.8	15123.3	16381
ENSMUSG00000008682	Rpl10	0.0533717	0.000291964	0.000578104	9183.06	7722	8399.75	9142.42
ENSMUSG00000008683	Rps15a	0.269511	4.33e-69	2.49e-68	8530.44	7000.75	9213.05	9508.23
ENSMUSG00000008690	Ncaph2	0.122175	3.04e-07	7.52e-07	3274.99	3292.36	3300.28	3847.45
ENSMUSG00000008730	Hipk1	-0.0166845	0.189426	0.236181	5621.07	6135.02	5272.86	6348.06
ENSMUSG00000008763	Man1a2	0.0822264	0.000231149	0.000462202	3676.32	3616.06	3583.5	4136.58
ENSMUSG00000008822	Acyp1	-0.301776	0.0102116	0.0166583	157.199	119.485	108.991	115.47
ENSMUSG00000008855	Hdac5	-0.0274657	0.268211	0.317553	957.487	1141.63	882.663	1176.87
ENSMUSG00000008859	Rala	-0.223994	1.58e-05	3.51e-05	782.424	726.687	585.414	706.674
ENSMUSG00000008892	Vdac3	0.0690492	0.0225442	0.0347456	1717.28	1701.04	1719.91	1865.99
ENSMUSG00000008932	Slc1a7	-9.08777	0	0	0	1.08623	0	0
ENSMUSG00000008958	Vps72	-0.165297	0.00422108	0.00727674	619.27	482.286	471.469	510.838
ENSMUSG00000008976	Gabpa	0.25445	5.49e-17	1.94e-16	1854.24	2089.91	2222.76	2482.13
ENSMUSG00000009013	Dynll1	0.00372871	0.465016	0.493352	1352.87	1112.3	1201.38	1270.17
ENSMUSG00000009030	Pdcl	0.66131	7.14e-76	4.23e-75	1143.27	1217.66	1858.63	1875.23
ENSMUSG00000009035	Tmem184b	0.557444	2.22e-16	7.75e-16	381.089	300.886	486.332	517.304
ENSMUSG00000009073	Nf2	-0.0221077	0.231924	0.281189	2338.93	2260.44	1973.4	2556.04
ENSMUSG00000009075	Cabp7	0.09613	0.474524	0.501919	21.4363	5.43115	14.8624	13.8564
ENSMUSG00000009076	Zmat5	-0.246958	0.0359499	0.0531846	158.39	90.157	103.211	106.232
ENSMUSG00000009079	Ewsr1	0.124389	1.47e-26	6.23e-26	14457.6	14089.5	14607.3	16510.3
ENSMUSG00000009090	Ap1b1	-0.0866042	0.00798291	0.0132608	1801.84	1537.01	1455.69	1688.63
ENSMUSG00000009092	Derl3	-0.509269	0.00102577	0.00191528	101.227	74.9498	54.4956	69.2818
ENSMUSG00000009093	Gstt4	12.7627	0	0	0	0	7.43121	6.4663
ENSMUSG00000009097	Tbx1	-0.233627	0.55115	0.57065	0	4.34492	0	3.69503
ENSMUSG00000009108	Gnat2	0.176157	0.337739	0.383708	11.909	8.68984	14.0367	9.23757
ENSMUSG00000009112	Bcl2l13	0.797896	4e-137	2.69e-136	1418.37	1363.22	2519.18	2316.78
ENSMUSG00000009114	2610028H24Rik	-9.22026	0	0	1.1909	0	0	0
ENSMUSG00000009115	Spatc1l	1.68574	0.103549	0.138056	0	1.08623	1.65138	1.84751
ENSMUSG00000009145	Dqx1	0.147138	0.0567714	0.080959	314.399	165.107	265.872	265.118
ENSMUSG00000009207	Lnpk	0.2296	3.46e-11	1.03e-10	1557.7	1466.41	1614.22	1931.58
ENSMUSG00000009210	Prr29	0.452476	0.101041	0.135321	19.0545	15.2072	33.0276	13.8564
ENSMUSG00000009246	Trpm5	2.18519	1.18e-26	5.02e-26	25.009	8.68984	78.4406	74.8243
ENSMUSG00000009281	Rarres2	10.8522	0	0	0	0	0	3.69503
ENSMUSG00000009291	Pttg1ip	-0.0741154	0.0542366	0.0776144	1117.07	911.346	794.314	1132.53
ENSMUSG00000009292	Trpm2	0.240217	0.0627619	0.0887656	102.418	58.6564	85.8718	104.385
ENSMUSG00000009293	Ube2g2	0.567578	3.51e-42	1.74e-41	952.723	868.984	1278.17	1421.66
ENSMUSG00000009350	Mpo	10.8522	0	0	0	0	0	3.69503
ENSMUSG00000009378	Slc16a12	1.58062	0.00074936	0.00141857	2.38181	5.43115	13.211	10.1613
ENSMUSG00000009406	Elk1	0.433007	5.31e-07	1.3e-06	245.326	186.831	283.212	300.221
ENSMUSG00000009418	Nav1	0.350932	0.662513	0.678402	0	2.17246	0	2.77127
ENSMUSG00000009470	Tnpo1	0.377883	1.16e-102	7.45e-102	5381.69	5891.71	6874.7	7774.34
ENSMUSG00000009487	Otog	12.225	0	0	0	0	4.95414	4.61878
ENSMUSG00000009535	Rnmt	0.445445	5.14e-36	2.42e-35	1283.79	1371.91	1696.79	1919.57
ENSMUSG00000009545	Kcnq1	2.87793	1.84e-05	4.07e-05	0	2.17246	13.211	2.77127
ENSMUSG00000009549	Srp14	-0.0445379	0.177742	0.223029	1009.89	892.881	885.14	959.783
ENSMUSG00000009551	6330409D20Rik	-0.68886	0.11328	0.149682	11.909	8.68984	9.08259	3.69503
ENSMUSG00000009555	Cdk9	0.529348	5.08e-108	3.28e-107	3063	2574.36	3898.08	4238.2
ENSMUSG00000009563	Tor2a	0.0214717	0.400433	0.439358	332.262	337.817	340.184	339.943
ENSMUSG00000009566	Fpgs	0.411049	8.17e-17	2.88e-16	705.015	676.721	848.81	988.42
ENSMUSG00000009569	Mrtfb	0.0232906	0.282042	0.331832	1350.48	1294.79	1312.85	1375.47
ENSMUSG00000009575	Cbx5	-0.190571	1.82e-80	1.09e-79	20533.6	22518.6	16617	21107.8
ENSMUSG00000009585	Apobec3	1.72664	0	0	6316.55	5311.66	18382.3	20101.9
ENSMUSG00000009588	St6galnac1	-10.0864	0	0	0	2.17246	0	0
ENSMUSG00000009596	Taf7l	8.69295	1	1	0	0	0.82569	0
ENSMUSG00000009614	Sardh	11.8598	0	0	0	0	7.43121	0
ENSMUSG00000009621	Vav2	0.286497	2.12e-15	7.16e-15	1499.35	1242.65	1692.67	1651.68
ENSMUSG00000009628	Tex15	1.02491	0.295925	0.34454	0	2.17246	1.65138	2.77127
ENSMUSG00000009630	Ppp2cb	0.376784	2.09e-13	6.65e-13	652.615	640.875	784.406	895.12
ENSMUSG00000009633	G0s2	-0.213481	0.379329	0.420443	8.33633	11.9485	8.2569	9.23757
ENSMUSG00000009640	Dmap1	0.16889	0.0114535	0.01856	425.153	271.557	350.918	432.318
ENSMUSG00000009646	Pla2g12b	10.8522	0	0	0	0	0	3.69503
ENSMUSG00000009647	Mcu	0.24304	0.0025076	0.00445322	297.726	209.642	318.716	281.746
ENSMUSG00000009654	Oit3	-11.0858	0	0	0	4.34492	0	0
ENSMUSG00000009681	Bcr	0.0941275	0.0146152	0.0232621	1076.58	1064.5	1103.95	1181.49
ENSMUSG00000009687	Fxyd5	-0.0838411	0.0085068	0.0140728	1637.49	1818.35	1292.21	1968.53
ENSMUSG00000009731	Kcnd1	1.30839	0.000869315	0.00163456	9.52723	4.34492	14.0367	20.3227
ENSMUSG00000009733	Tfcp2	-0.779136	2.99e-08	7.85e-08	133.381	108.623	72.6607	68.358
ENSMUSG00000009739	Pou6f1	0.792902	0.175259	0.220316	0	4.34492	6.60552	0.923757
ENSMUSG00000009741	Ubp1	0.553688	2.48e-59	1.36e-58	1404.08	1346.92	1864.41	2173.6
ENSMUSG00000009772	Nuak2	1.03316	2.26e-70	1.31e-69	420.389	326.955	686.974	842.466
ENSMUSG00000009828	Ick	0.0305977	0.365978	0.409868	246.517	273.73	246.881	284.517
ENSMUSG00000009863	Sdhb	-0.188097	8.03e-07	1.94e-06	1568.42	1258.94	1302.11	1179.64
ENSMUSG00000009876	Cox4i2	4.04413	9e-10	2.53e-09	1.1909	0	13.211	6.4663
ENSMUSG00000009894	Snap47	-0.536476	0.045909	0.0666534	27.3908	24.9833	14.8624	21.2464
ENSMUSG00000009905	Kdsr	0.396267	3.07e-12	9.43e-12	550.198	495.321	633.304	742.701
ENSMUSG00000009907	Vps4b	0.252781	2.58e-20	9.88e-20	2449.69	2425.55	2681.02	3127.84
ENSMUSG00000009927	Rps25	0.0175895	0.0952098	0.128531	12244.9	10828.6	11314.4	12042.1
ENSMUSG00000009995	Taz	0.0274063	0.338139	0.383708	518.043	429.061	397.157	568.11
ENSMUSG00000010021	Kif19a	-0.105866	0.249281	0.298213	83.3633	108.623	76.7892	101.613
ENSMUSG00000010025	Aldh3a2	0.00665706	0.463325	0.491884	604.979	577.874	549.084	639.24
ENSMUSG00000010044	Zmynd10	0.30381	0.277435	0.326985	8.33633	13.0348	18.9909	7.39006
ENSMUSG00000010045	Tmem115	0.0526029	0.169523	0.213957	735.979	589.823	680.369	694.665
ENSMUSG00000010047	Hyal2	-0.143715	0.0697896	0.0974665	264.381	218.332	186.606	250.338
ENSMUSG00000010048	Ifrd2	0.109737	0.0112044	0.0181763	933.669	774.482	861.195	981.954
ENSMUSG00000010051	Hyal1	-0.0747386	0.523356	0.544243	13.0999	9.77606	11.5597	10.1613
ENSMUSG00000010054	Tusc2	-0.0150183	0.475089	0.502434	148.863	137.951	137.89	145.954
ENSMUSG00000010057	Nprl2	0.0892863	0.270554	0.32007	120.281	92.3295	86.6975	139.487
ENSMUSG00000010066	Cacna2d2	-1.39349	0.338235	0.383708	0	2.17246	0.82569	0
ENSMUSG00000010067	Rassf1	0.810569	1.09e-28	4.74e-28	285.817	243.315	422.753	505.295
ENSMUSG00000010080	Epn3	8.85449	1	1	0	0	0	0.923757
ENSMUSG00000010095	Slc3a2	0.53239	1.38e-119	9.1e-119	3194	2974.1	4158.18	4762.89
ENSMUSG00000010097	Nxf1	0.260818	1.61e-25	6.71e-25	3085.63	2756.85	3259	3741.22
ENSMUSG00000010110	Stx5a	0.598994	6.17e-32	2.8e-31	620.461	584.391	835.599	989.344
ENSMUSG00000010122	Slc47a1	-12.2181	0	0	9.52723	0	0	0
ENSMUSG00000010136	Pifo	-10.0864	0	0	0	2.17246	0	0
ENSMUSG00000010142	Tnfrsf13b	-0.277235	6.8e-18	2.46e-17	2045.97	2165.94	1513.49	1962.06
ENSMUSG00000010154	Spire2	-0.472213	0.2586	0.307511	7.14542	0	3.30276	1.84751
ENSMUSG00000010277	2610507B11Rik	-0.113342	1.18e-11	3.56e-11	7395.51	7483.03	6404.05	7350.33
ENSMUSG00000010290	AI597479	-0.498568	9.34e-13	2.91e-12	481.125	452.958	305.505	355.646
ENSMUSG00000010307	Tmem86a	-0.0663702	0.345713	0.390952	94.0814	106.45	90.8259	100.69
ENSMUSG00000010342	Tex14	0.95319	5.83e-08	1.5e-07	52.3998	31.5007	86.6975	75.7481
ENSMUSG00000010358	Ifi35	0.317902	3.69e-05	7.93e-05	315.589	242.229	305.505	389.825
ENSMUSG00000010362	Rdm1	0.24604	2.39e-05	5.25e-05	506.134	515.959	644.038	568.11
ENSMUSG00000010376	Nedd8	-0.124254	3.35e-06	7.75e-06	2889.13	2736.21	2464.69	2696.45
ENSMUSG00000010392	Gosr1	0.13466	0.000963267	0.00180259	1022.99	1066.68	1038.72	1255.39
ENSMUSG00000010406	Mrpl52	-0.390275	5.54e-13	1.74e-12	744.315	764.705	564.772	586.586
ENSMUSG00000010435	Spaca7	-0.9702	0.163042	0.206694	0	5.43115	0	2.77127
ENSMUSG00000010453	Kansl3	0.628614	4.86e-85	2.97e-84	1605.34	1377.34	2216.15	2395.3
ENSMUSG00000010492	Uckl1os	0.0670145	0.365084	0.409033	50.018	83.6397	57.7983	82.2144
ENSMUSG00000010517	Faf1	0.152039	2.84e-06	6.62e-06	1767.3	1688	1849.55	1989.77
ENSMUSG00000010529	Gm266	0.427667	1.29e-17	4.63e-17	816.96	524.649	914.039	890.502
ENSMUSG00000010538	Tsacc	-0.55133	0.00618103	0.0104497	51.2089	51.0528	34.679	35.1028
ENSMUSG00000010554	Mettl16	0.277671	2.03e-15	6.89e-15	1413.6	1516.38	1664.59	1887.24
ENSMUSG00000010607	Pigyl	-0.422626	1.18e-07	2.98e-07	400.144	292.196	286.515	230.015
ENSMUSG00000010608	Rbm25	0.261018	2.97e-94	1.86e-93	11994.8	10885.1	13436.5	13981.1
ENSMUSG00000010609	Psen2	-0.166105	0.0578541	0.0824175	240.563	150.986	165.138	183.828
ENSMUSG00000010660	Plcd1	-0.0904145	0.547128	0.567279	8.33633	4.34492	0.82569	11.0851
ENSMUSG00000010663	Fads1	-0.0606477	0.0686652	0.0960774	1171.85	1351.27	988.351	1430.9
ENSMUSG00000010721	Lmbr1	-10.2191	0	0	2.38181	0	0	0
ENSMUSG00000010751	Tnfrsf22	-0.0851683	0.219692	0.267932	182.208	204.211	129.633	234.634
ENSMUSG00000010755	Cars	0.742384	1.01e-181	7.15e-181	2004.29	2389.7	3230.93	4119.96
ENSMUSG00000010760	Phlda2	9.85293	0	0	0	0	0	1.84751
ENSMUSG00000010825	Grid2ip	11.143	0	0	0	0	0.82569	3.69503
ENSMUSG00000010830	Kdelr3	0.399355	0.214922	0.263015	5.95452	5.43115	5.77983	9.23757
ENSMUSG00000010841	Cfap97d1	2.75431	9.78e-18	3.53e-17	8.33633	2.17246	17.3395	53.5779
ENSMUSG00000010911	Apip	-0.0577826	0.267084	0.316315	257.235	260.695	259.267	238.329
ENSMUSG00000010914	Pdhx	0.480538	1.12e-16	3.95e-16	521.616	455.13	643.213	719.607
ENSMUSG00000010936	Vac14	0.403033	5.02e-39	2.43e-38	1867.34	1732.54	2287.16	2472.9
ENSMUSG00000011008	Mcoln2	0.180663	0.00391277	0.00677678	425.153	407.336	385.597	557.949
ENSMUSG00000011096	Akt1s1	1.02786	1.55e-80	9.3e-80	444.207	426.888	756.332	1019.83
ENSMUSG00000011114	Tbrg1	-0.159445	0.00791887	0.0131635	509.707	502.924	400.46	506.219
ENSMUSG00000011148	Adssl1	0.101876	0.186309	0.232686	146.481	193.349	188.257	176.438
ENSMUSG00000011158	Brf1	0.324017	7.21e-22	2.83e-21	1560.08	1545.7	1829.73	2058.13
ENSMUSG00000011171	Vipr2	-0.794018	0.0688612	0.0963306	10.7181	11.9485	6.60552	6.4663
ENSMUSG00000011179	Odc1	0.151429	2.48e-18	9.05e-18	6676.21	6023.14	6751.67	7353.1
ENSMUSG00000011254	Thg1l	0.0323585	0.29535	0.34454	596.643	540.942	494.588	668.8
ENSMUSG00000011256	Adam19	0.530211	3.04e-09	8.34e-09	229.844	161.848	261.744	303.916
ENSMUSG00000011257	Pabpc4	0.367518	4.83e-89	2.98e-88	5431.71	4930.4	6371.03	6997.46
ENSMUSG00000011263	Exoc3l2	-10.0864	0	0	0	2.17246	0	0
ENSMUSG00000011267	Zfp296	1.25965	3.78e-69	2.17e-68	242.944	199.866	554.038	506.219
ENSMUSG00000011305	Plin5	1.88497	2.59e-07	6.44e-07	8.33633	4.34492	25.5964	21.2464
ENSMUSG00000011306	Sugp1	0.483841	1.52e-29	6.71e-29	878.887	913.519	1139.45	1367.16
ENSMUSG00000011350	Gm5893	2.32615	0.00144423	0.00264832	2.38181	0	8.2569	3.69503
ENSMUSG00000011382	Dhdh	-0.218803	0.377041	0.418324	22.6272	4.34492	14.8624	8.31381
ENSMUSG00000011427	Zfp790	-0.254704	0.00022732	0.000454923	383.471	462.734	336.056	373.198
ENSMUSG00000011486	Slc25a41	2.74585	0.000137891	0.000282051	0	2.17246	1.65138	12.9326
ENSMUSG00000011589	Fsd1	2.21659	0.0226684	0.0348383	1.1909	0	0	5.54254
ENSMUSG00000011632	Pinlyp	0.772994	0.138191	0.17822	4.76361	2.17246	9.08259	2.77127
ENSMUSG00000011658	Fuz	0.478919	5.63e-07	1.37e-06	186.972	155.331	222.111	254.957
ENSMUSG00000011751	Sptbn4	-0.477498	0.169787	0.214276	19.0545	7.60361	9.90828	9.23757
ENSMUSG00000011752	Pgam1	0.0764196	1.78e-05	3.94e-05	5569.86	6240.39	5308.36	7144.34
ENSMUSG00000011831	Evi5	0.269936	6.5e-05	0.000137004	351.317	400.819	383.12	523.77
ENSMUSG00000011832	Evi5l	0.0634596	0.302199	0.350826	127.427	186.831	175.046	153.344
ENSMUSG00000011837	Snapc2	0.0214585	0.383606	0.424231	538.288	439.923	506.974	485.896
ENSMUSG00000011877	Git1	0.0267326	0.245304	0.294283	1585.09	1271.97	1417.71	1492.79
ENSMUSG00000011884	Gltp	0.290312	4.9e-10	1.39e-09	832.442	788.603	871.103	1111.28
ENSMUSG00000011958	Bnip2	0.0230822	0.253814	0.302853	1781.59	1749.92	1589.45	1999.01
ENSMUSG00000011960	Ccnt1	0.735078	5.62e-162	3.88e-161	2038.83	1959.56	3114.5	3540.76
ENSMUSG00000012017	Scarf2	-0.149904	0.286813	0.336679	27.3908	44.5354	29.7249	35.1028
ENSMUSG00000012042	4930579F01Rik	-9.08777	0	0	0	1.08623	0	0
ENSMUSG00000012076	Brms1l	0.26143	1.54e-07	3.89e-07	753.842	673.462	808.351	902.51
ENSMUSG00000012114	Med15	0.256827	1.33e-14	4.39e-14	1639.87	1608.71	1711.66	2169.9
ENSMUSG00000012117	Dhdds	0.112306	0.011292	0.0183107	839.587	799.465	847.984	923.757
ENSMUSG00000012123	Crybg2	0.67616	0.00165014	0.00300417	20.2454	36.9318	39.6331	51.7304
ENSMUSG00000012126	Ubxn11	0.12395	0.0833055	0.114132	260.808	232.453	257.615	279.898
ENSMUSG00000012187	Mogat1	-0.863616	0.236221	0.285058	1.1909	2.17246	0	1.84751
ENSMUSG00000012211	Tex22	0.195995	0.248652	0.297597	25.009	34.7593	37.9818	30.484
ENSMUSG00000012296	Tjap1	0.553445	2.15e-34	9.98e-34	850.305	702.79	1108.9	1170.4
ENSMUSG00000012405	Rpl15	0.250289	6.64e-84	4.05e-83	12074.6	10118.2	13223.4	13173.7
ENSMUSG00000012422	Tmem167	0.105484	0.00112849	0.00209569	1632.73	1684.74	1729	1840.12
ENSMUSG00000012429	Mplkip	0.159067	0.0165659	0.0261213	398.953	303.058	330.276	453.565
ENSMUSG00000012443	Kif11	-0.110358	7.78e-11	2.28e-10	6992.99	7380.93	6180.29	7135.1
ENSMUSG00000012483	Rpa3	0.0483076	0.227547	0.276461	487.08	481.2	537.524	463.726
ENSMUSG00000012519	Mlkl	0.0799482	0.363464	0.407638	39.2998	63.0013	46.2387	61.8917
ENSMUSG00000012535	Tnpo3	0.0829305	0.000119947	0.00024692	4021.68	3828.96	4002.12	4313.02
ENSMUSG00000012609	Ttll5	0.153937	3.75e-06	8.66e-06	1542.22	1751	1707.53	1956.52
ENSMUSG00000012640	Zfp715	0.137693	0.00816187	0.0135359	596.643	597.426	660.552	653.096
ENSMUSG00000012705	Retn	10.3316	0	0	0	0	1.65138	0.923757
ENSMUSG00000012777	Acp4	1.57295	7.14e-29	3.12e-28	46.4452	51.0528	132.11	157.962
ENSMUSG00000012819	Cdh23	-1.13172	0.000182978	0.000369487	29.7726	23.897	11.5597	12.9326
ENSMUSG00000012848	Rps5	0.122946	8.02e-29	3.51e-28	16611.9	15328.9	16847.4	17934.7
ENSMUSG00000012889	Podnl1	-0.483257	0.10671	0.141808	11.909	19.5521	4.95414	17.5514
ENSMUSG00000013033	Adgrl1	0.223089	3.49e-08	9.13e-08	1124.21	1066.68	1187.34	1369.93
ENSMUSG00000013076	Amotl1	0.0446758	0.0628077	0.0888239	2146.01	2662.35	1952.76	3006.83
ENSMUSG00000013089	Etv5	-0.539009	6.9e-78	4.11e-77	2781.95	2837.23	1613.4	2253.97
ENSMUSG00000013091	Tmem190	-1.98427	0.010265	0.016737	4.76361	5.43115	1.65138	0.923757
ENSMUSG00000013150	Gfod2	0.0708294	0.306811	0.355429	125.045	115.14	108.165	144.106
ENSMUSG00000013155	Enkd1	-0.41972	5.95e-06	1.36e-05	250.09	256.35	141.193	237.406
ENSMUSG00000013158	4933405L10Rik	0.245217	0.369892	0.411224	0	4.34492	3.30276	1.84751
ENSMUSG00000013160	Atp6v0d1	-0.0904367	0.0895795	0.121904	487.08	460.561	439.267	450.793
ENSMUSG00000013236	Ptprs	0.397445	8e-61	4.43e-60	2904.61	2997.99	3745.33	4029.43
ENSMUSG00000013275	Slc41a1	0.704556	2.63e-35	1.23e-34	476.361	439.923	688.626	804.592
ENSMUSG00000013338	Fer1l4	3.00717	0.00235732	0.00420575	0	1.08623	4.12845	4.61878
ENSMUSG00000013367	Iglon5	11.1739	0	0	0	0	0	4.61878
ENSMUSG00000013418	B4galnt2	0.432033	0.0348732	0.0517228	36.918	21.7246	33.8533	45.2641
ENSMUSG00000013419	Zfp651	1.34909	4.4e-07	1.08e-06	17.8636	10.8623	37.1561	36.0265
ENSMUSG00000013465	Nelfb	-0.0509793	0.110385	0.146216	1290.94	1170.96	1131.2	1245.22
ENSMUSG00000013483	Card14	8.69295	1	1	0	0	0.82569	0
ENSMUSG00000013495	Tmem175	-0.345118	7.94e-05	0.000166068	245.326	303.058	168.441	263.271
ENSMUSG00000013523	Bcas1	-12.5273	0	0	10.7181	1.08623	0	0
ENSMUSG00000013539	Tango2	-0.180179	0.0143738	0.0228991	314.399	333.472	241.102	330.705
ENSMUSG00000013562	4833413E03Rik	-10.0864	0	0	0	2.17246	0	0
ENSMUSG00000013593	Ndufs2	-0.0768202	0.047416	0.0686447	1006.31	1013.45	885.966	1029.07
ENSMUSG00000013622	Atraid	0.131733	0.130911	0.169729	170.299	144.469	184.129	160.734
ENSMUSG00000013629	Cad	0.0637895	0.00235287	0.00420482	4084.8	3841.99	3904.69	4380.46
ENSMUSG00000013646	Sh3bp5l	-0.0441344	0.234642	0.28406	590.688	536.597	501.194	592.128
ENSMUSG00000013662	Atad1	0.323136	9.92e-53	5.27e-52	3740.63	4225.43	4173.04	5792.88
ENSMUSG00000013663	Pten	0.177398	3.55e-34	1.64e-33	8837.7	9104.77	9412.87	10877.2
ENSMUSG00000013698	Pea15a	1.16953	2.14e-71	1.24e-70	292.962	260.695	511.928	733.463
ENSMUSG00000013701	Timm23	0.551281	5.62e-82	3.4e-81	2072.17	1805.31	2870.1	2811.92
ENSMUSG00000013707	Tnfaip8l2	-1.07906	9.2e-32	4.15e-31	377.516	237.884	129.633	161.657
ENSMUSG00000013736	Trnt1	0.699027	1.34e-71	7.8e-71	972.968	985.21	1514.32	1664.61
ENSMUSG00000013787	Ehmt2	-0.216902	3.94e-17	1.4e-16	3321.43	3144.63	2444.87	3118.6
ENSMUSG00000013822	Elof1	-0.295737	5.31e-08	1.37e-07	706.206	731.032	563.946	606.908
ENSMUSG00000013833	Med16	0.332894	2.85e-10	8.17e-10	620.461	626.754	781.103	789.812
ENSMUSG00000013846	St3gal1	0.128625	0.00757354	0.0126254	849.114	567.012	809.177	739.006
ENSMUSG00000013858	Tmem259	0.247965	5.58e-10	1.58e-09	1175.42	1073.19	1246.79	1423.51
ENSMUSG00000013878	Rnf170	-0.211175	0.000608969	0.00116332	493.034	540.942	428.533	464.65
ENSMUSG00000013921	Clip3	-1.44578	0.0138724	0.0221499	5.95452	10.8623	2.47707	3.69503
ENSMUSG00000013928	Thap8	1.72027	0.000280951	0.000557099	4.76361	3.25869	10.734	15.7039
ENSMUSG00000013973	Dedd	0.87108	3.75e-12	1.15e-11	86.936	84.7259	148.624	165.352
ENSMUSG00000013997	Nit1	0.370119	0.000349714	0.000687012	142.908	148.813	193.212	183.828
ENSMUSG00000014030	Pax5	0.233636	0	0	51444.7	53256.7	54311.4	68795.9
ENSMUSG00000014039	Prdm15	-0.162095	0.000864433	0.00162586	822.914	815.758	696.883	767.642
ENSMUSG00000014074	Rnf168	0.509838	3.53e-45	1.79e-44	1280.22	1214.4	1709.18	1842.89
ENSMUSG00000014075	Tctex1d2	0.832595	0.145091	0.186171	5.95452	1.08623	3.30276	9.23757
ENSMUSG00000014077	Chp1	0.0952672	0.00444192	0.00763693	1585.09	1450.12	1485.42	1756.99
ENSMUSG00000014158	Trpv4	1.31961	0.00258981	0.00459161	5.95452	4.34492	9.08259	16.6276
ENSMUSG00000014164	Klhl3	0.350613	0.517245	0.538819	2.38181	1.08623	1.65138	2.77127
ENSMUSG00000014177	Tvp23b	-0.215325	0.0109221	0.0177543	246.517	253.091	180	250.338
ENSMUSG00000014195	Dnajc7	-0.0891276	4.15e-05	8.87e-05	4060.98	4224.35	3641.29	4147.67
ENSMUSG00000014198	Zfp385c	-1.48918	0.00045027	0.000873592	20.2454	9.77606	3.30276	7.39006
ENSMUSG00000014226	Cacybp	-0.126941	8.45e-06	1.91e-05	2575.92	2376.67	2187.25	2348.19
ENSMUSG00000014232	Cluap1	-0.28163	2.6e-05	5.67e-05	478.743	447.527	335.23	426.776
ENSMUSG00000014243	Zswim7	0.354196	0.0262789	0.0399074	61.927	51.0528	75.1378	69.2818
ENSMUSG00000014245	Pigl	-0.228927	0.00967988	0.0158608	246.517	230.281	198.991	207.845
ENSMUSG00000014294	Ndufa2	-0.2021	5.65e-05	0.000119722	900.323	706.049	663.855	732.539
ENSMUSG00000014301	Pam16	0.0298287	0.367304	0.411019	266.762	247.66	252.661	272.508
ENSMUSG00000014303	Glis2	0.706781	0.00360423	0.00627344	22.6272	22.8108	28.8992	45.2641
ENSMUSG00000014313	Cox6c	0.0264003	0.130083	0.168746	4177.69	3283.67	3784.96	3814.19
ENSMUSG00000014349	Ube2z	0.607009	4.3e-72	2.51e-71	1327.86	1402.32	2017.99	2140.34
ENSMUSG00000014351	Gip	-0.516531	0.361061	0.405257	0	8.68984	3.30276	2.77127
ENSMUSG00000014353	Tmem87b	0.835384	4.62e-37	2.2e-36	353.698	293.282	507.8	646.63
ENSMUSG00000014355	Anapc1	0.0575101	0.000592972	0.00113479	5949.76	7006.18	6427.17	7055.66
ENSMUSG00000014402	Tsg101	0.179709	6.27e-05	0.000132205	952.723	808.155	940.461	1054.01
ENSMUSG00000014418	Hps5	-0.142272	0.000381843	0.00074655	1245.69	1176.39	1051.93	1142.69
ENSMUSG00000014426	Map3k4	-0.0171039	0.305378	0.354004	1881.63	1863.97	1734.78	1966.68
ENSMUSG00000014444	Piezo1	0.477601	1.93e-44	9.69e-44	1496.97	1341.49	1909	2043.35
ENSMUSG00000014453	Blk	-0.366228	1.23e-83	7.49e-83	6494	6126.33	4495.06	5295.9
ENSMUSG00000014470	Rnf166	0.106164	0.10938	0.144997	248.899	320.438	269.175	343.638
ENSMUSG00000014496	Ankrd28	0.186341	1.35e-10	3.93e-10	2231.75	2147.48	2253.31	2729.7
ENSMUSG00000014498	Ankrd52	0.0155882	0.263717	0.312784	3426.23	3367.31	3304.41	3562.93
ENSMUSG00000014503	Pkd2l2	0.0177216	0.445722	0.477939	84.5542	114.054	72.6607	128.402
ENSMUSG00000014504	Srp19	0.121575	0.000809261	0.00152686	1429.08	1225.27	1438.35	1449.37
ENSMUSG00000014529	Tmbim7	0.591416	0.22487	0.273589	5.95452	2.17246	5.77983	6.4663
ENSMUSG00000014542	Clec4f	-10.0864	0	0	0	2.17246	0	0
ENSMUSG00000014547	Wdfy2	-0.00761291	0.456616	0.485913	489.461	546.373	478.9	551.483
ENSMUSG00000014550	Rbsn	0.324561	1.22e-16	4.26e-16	1248.07	1040.61	1364.04	1502.03
ENSMUSG00000014551	Mrps25	-0.0592022	0.149606	0.191355	650.233	710.394	655.598	650.325
ENSMUSG00000014554	Dguok	-0.596662	7.14e-09	1.92e-08	228.654	203.125	108.165	177.361
ENSMUSG00000014592	Camta1	0.522443	1.25e-15	4.27e-15	401.335	350.852	508.625	571.806
ENSMUSG00000014599	Csf1	0.168415	1.11e-06	2.65e-06	1479.1	1567.43	1521.75	1902.02
ENSMUSG00000014601	Strip1	0.15258	0.000706864	0.00134102	925.332	797.292	880.186	1034.61
ENSMUSG00000014606	Slc25a11	-0.268877	5.7e-05	0.000120817	508.516	420.371	392.203	378.74
ENSMUSG00000014609	Chrne	1.99114	0.00751158	0.0125275	2.38181	0	5.77983	3.69503
ENSMUSG00000014633	Cmc2	-0.335395	0.000190194	0.000383655	252.472	255.264	197.34	205.074
ENSMUSG00000014668	Chfr	-0.0666037	0.0862084	0.117739	980.114	850.518	775.323	972.716
ENSMUSG00000014686	Ceacam16	1.40981	0.000271063	0.000538101	5.95452	6.51738	16.5138	16.6276
ENSMUSG00000014725	Adam28	9.85293	0	0	0	0	0	1.84751
ENSMUSG00000014747	Ankrd53	0.241663	0.107718	0.142981	34.5362	63.0013	47.89	67.4343
ENSMUSG00000014748	Tex261	-0.00168787	0.481031	0.507798	1513.64	1277.41	1424.32	1363.47
ENSMUSG00000014763	Fam120b	-0.136235	0.00190797	0.00344328	883.651	1055.81	837.25	927.452
ENSMUSG00000014767	Tbp	-0.124687	0.00205704	0.00370087	1158.75	1123.16	935.507	1157.47
ENSMUSG00000014769	Psmb1	-0.0682222	0.0155758	0.024659	2337.74	1938.92	2062.57	2016.56
ENSMUSG00000014773	Dll1	2.11058	1.24e-21	4.87e-21	7.14542	22.8108	46.2387	83.1381
ENSMUSG00000014776	Nol3	1.2178	0.118546	0.155595	2.38181	0	0	5.54254
ENSMUSG00000014778	Fhod1	-0.207886	0.000373034	0.000730365	556.152	608.288	416.974	591.204
ENSMUSG00000014782	Plekhg4	0.160455	0.392422	0.43207	3.57271	14.121	12.3854	7.39006
ENSMUSG00000014786	Slc9a5	0.422677	9.81e-06	2.21e-05	184.59	172.71	206.423	272.508
ENSMUSG00000014791	Elmo3	0.397471	3.88e-06	8.94e-06	190.545	253.091	283.212	301.145
ENSMUSG00000014813	Stc1	-0.375302	0.386088	0.426218	2.38181	1.08623	0.82569	1.84751
ENSMUSG00000014837	4931428F04Rik	0.195433	0.0480086	0.0694451	121.472	165.107	169.267	158.886
ENSMUSG00000014846	Tppp3	-0.12364	0.606383	0.622847	3.57271	3.25869	1.65138	4.61878
ENSMUSG00000014850	Msh3	-0.0192516	0.283242	0.332974	1814.94	1908.51	1778.54	1895.55
ENSMUSG00000014852	Adamts13	11.3849	0	0	0	0	1.65138	3.69503
ENSMUSG00000014856	Tmem208	-0.380368	1.42e-05	3.17e-05	284.626	271.557	221.285	205.998
ENSMUSG00000014859	E2f4	0.112061	0.000146587	0.000299235	2198.41	1941.09	2130.28	2343.57
ENSMUSG00000014867	Surf4	0.226912	8.37e-12	2.53e-11	1756.58	1552.22	1796.7	2075.68
ENSMUSG00000014873	Surf2	0.233974	0.000137953	0.000282148	519.234	394.301	528.442	545.94
ENSMUSG00000014905	Dnajb9	1.93831	0	0	360.844	410.595	1325.23	1631.35
ENSMUSG00000014907	Naf1	0.565558	4.21e-34	1.95e-33	747.888	721.256	974.315	1199.96
ENSMUSG00000014932	Yes1	11.3033	0	0	0	0	4.12845	0.923757
ENSMUSG00000014956	Ppp1cb	0.0634136	0.000689019	0.00130936	5166.14	5134.61	4892.22	5871.4
ENSMUSG00000014959	Gorasp2	0.0284256	0.244839	0.293795	1299.28	1175.3	1243.49	1280.33
ENSMUSG00000014980	Tsen15	-0.0290624	0.326616	0.374454	649.043	501.838	559.818	568.11
ENSMUSG00000015001	Oc90	-1.10851	0.0146669	0.0233121	13.0999	8.68984	8.2569	1.84751
ENSMUSG00000015002	Efr3a	-0.0367315	0.111966	0.148057	2217.46	2408.17	1979.18	2530.17
ENSMUSG00000015013	Trappc2l	-0.00858939	0.46445	0.49286	228.654	196.608	197.34	225.397
ENSMUSG00000015016	Acsf3	0.105623	0.101572	0.135919	332.262	278.075	335.23	321.467
ENSMUSG00000015023	Ddx19a	0.392873	1.4e-30	6.25e-30	1519.59	1418.62	1903.22	1954.67
ENSMUSG00000015027	Galns	0.0320557	0.23282	0.282174	1082.53	1056.9	971.837	1215.66
ENSMUSG00000015053	Gata2	-9.22026	0	0	1.1909	0	0	0
ENSMUSG00000015083	C8g	0.447818	0.0203387	0.0315331	29.7726	43.4492	37.9818	61.8917
ENSMUSG00000015087	Rabl6	0.0659763	0.0174293	0.0273907	2091.23	2077.96	2026.24	2338.03
ENSMUSG00000015090	Ptgds	-1.30521	0.00646588	0.0108978	7.14542	11.9485	4.95414	2.77127
ENSMUSG00000015092	Edf1	-0.11564	0.00207825	0.00373588	1492.2	1137.28	1172.48	1254.46
ENSMUSG00000015093	Clic3	-0.00306341	0.53549	0.55578	41.6816	36.9318	23.945	54.5017
ENSMUSG00000015095	Fbxw5	-0.0644558	0.100799	0.135025	859.833	817.931	739.819	864.636
ENSMUSG00000015120	Ube2i	0.544279	2.91e-256	2.14e-255	6507.1	6207.8	8816.72	9725.31
ENSMUSG00000015126	Tsr3	0.066234	0.237651	0.286532	279.862	232.453	220.459	315.925
ENSMUSG00000015127	Unkl	0.218714	0.000154071	0.000313647	504.943	535.511	562.295	648.477
ENSMUSG00000015133	Lrrk1	0.547189	6.96e-15	2.32e-14	325.117	310.662	468.992	460.031
ENSMUSG00000015134	Aldh1a3	0.97762	2.04e-07	5.09e-07	57.1634	15.2072	83.3947	59.1204
ENSMUSG00000015143	Actn1	1.78029	0.000232718	0.000465195	3.57271	3.25869	12.3854	11.0851
ENSMUSG00000015149	Sirt2	-0.121039	0.0578689	0.0824326	400.144	337.817	337.707	340.866
ENSMUSG00000015165	Hnrnpl	0.248392	1.59e-60	8.78e-60	8522.11	7579.71	9055.35	10071.7
ENSMUSG00000015176	Nolc1	0.323747	8.9e-140	6e-139	11350.5	10239.9	13266.4	13755.7
ENSMUSG00000015189	Casd1	0.152237	0.00370777	0.00644433	710.97	504.01	625.048	725.149
ENSMUSG00000015202	Cnksr3	0.614915	1.44e-27	6.17e-27	507.325	460.561	679.543	802.745
ENSMUSG00000015214	Mtmr1	0.0770542	0.0548544	0.0784227	836.014	888.536	829.819	989.344
ENSMUSG00000015217	Hmgb3	-0.0169227	0.265101	0.314315	2996.31	2827.46	2785.05	2970.8
ENSMUSG00000015222	Map2	0.959348	0.0356856	0.0528139	1.1909	7.60361	11.5597	5.54254
ENSMUSG00000015243	Abca1	-0.942863	0.351254	0.395795	4.76361	0	2.47707	0
ENSMUSG00000015247	Nipsnap3b	0.00785255	0.475085	0.502434	252.472	189.004	198.166	245.719
ENSMUSG00000015289	Lage3	-0.169545	0.0380697	0.0560451	244.135	229.194	189.909	230.939
ENSMUSG00000015290	Ubl4a	-0.0885312	0.101892	0.136318	515.661	402.991	417.799	446.175
ENSMUSG00000015291	Gdi1	-0.0845586	0.0165437	0.0260905	1382.64	1302.39	1196.43	1335.75
ENSMUSG00000015305	Sash1	-11.8928	0	0	0	7.60361	0	0
ENSMUSG00000015312	Gadd45b	4.37918	0	0	406.098	326.955	7593.87	7660.72
ENSMUSG00000015314	Slamf6	-0.125925	4.26e-06	9.81e-06	2927.24	2465.74	2449	2493.22
ENSMUSG00000015316	Slamf1	0.41306	0.000490921	0.000947401	107.181	115.14	113.12	182.904
ENSMUSG00000015335	Zdhhc12	-0.13578	0.195088	0.242237	121.472	77.1223	56.9726	123.783
ENSMUSG00000015337	Endog	0.0458622	0.409901	0.448017	73.836	81.4672	73.4864	86.8331
ENSMUSG00000015340	Cybb	1.76142	3.52481639133131e-314	2.65235890706662e-313	277.481	543.115	1285.6	1496.49
ENSMUSG00000015341	Golga7	0.302543	3.2e-18	1.17e-17	1432.66	1508.77	1671.2	1956.52
ENSMUSG00000015342	Xk	0.159587	0.00291839	0.00514432	514.47	662.6	581.286	733.463
ENSMUSG00000015355	Cd48	-0.563115	2.98e-20	1.14e-19	694.297	558.322	429.359	418.462
ENSMUSG00000015357	Clpx	0.077351	0.0582227	0.0828874	852.687	828.793	828.167	945.927
ENSMUSG00000015363	Trabd	-0.163124	0.00109685	0.00203949	768.133	765.792	630.002	739.929
ENSMUSG00000015377	Dennd6b	0.584969	1.64e-15	5.57e-15	317.971	256.35	376.515	484.972
ENSMUSG00000015451	C4a	1.11779	0.000190647	0.00038449	22.6272	3.25869	24.7707	31.4077
ENSMUSG00000015452	Ager	0.477538	0.0243111	0.0371653	30.9635	26.0695	31.3762	48.0354
ENSMUSG00000015461	Atf6b	-0.165322	0.000329255	0.00064854	988.45	874.415	713.396	947.775
ENSMUSG00000015467	Egfl8	1.37533	0.0114206	0.0185083	5.95452	0	9.90828	5.54254
ENSMUSG00000015468	Notch4	-0.184271	0.194148	0.241179	54.7816	64.0875	60.2754	44.3403
ENSMUSG00000015474	Ppt2	1.95915	0.024737	0.0377326	0	2.17246	6.60552	1.84751
ENSMUSG00000015478	Rnf5	-0.161255	0.0129424	0.0207666	454.925	372.577	326.148	413.843
ENSMUSG00000015488	Cacfd1	-0.0444918	0.124205	0.161918	1518.4	1402.32	1277.34	1554.68
ENSMUSG00000015501	Hivep2	0.234802	6.65e-14	2.15e-13	1881.63	1833.56	1962.67	2409.16
ENSMUSG00000015522	Arnt	0.206981	5.64e-08	1.45e-07	1198.05	1299.13	1203.03	1679.39
ENSMUSG00000015533	Itga2	-1.04197	0.0737269	0.102497	4.76361	4.34492	1.65138	2.77127
ENSMUSG00000015536	Mocs2	-0.18484	0.0110108	0.0178833	334.644	351.938	312.111	291.907
ENSMUSG00000015542	Nat9	-0.633413	0.000488531	0.000942979	59.5452	77.1223	43.7616	44.3403
ENSMUSG00000015568	Lpl	2.57709	0.000907824	0.00170248	0	2.17246	7.43121	5.54254
ENSMUSG00000015575	Atp6v0e	0.289926	4.39e-09	1.2e-08	776.469	666.945	852.938	911.748
ENSMUSG00000015579	Nkx2-5	9.6912	0	0	0	0	1.65138	0
ENSMUSG00000015597	Zfp318	0.161228	3.63e-09	9.93e-09	2243.66	2729.69	2571.2	2990.2
ENSMUSG00000015599	Ttbk1	0.765709	0.295925	0.34454	0	2.17246	0	3.69503
ENSMUSG00000015605	Srf	1.1079	2.85e-183	2.02e-182	882.46	783.171	1693.49	1896.47
ENSMUSG00000015619	Gata3	9.6912	0	0	0	0	1.65138	0
ENSMUSG00000015647	Lama5	1.18879	4.74e-14	1.54e-13	69.0724	24.9833	92.4773	121.936
ENSMUSG00000015656	Hspa8	0.526037	0	0	41252.9	39207.4	55276.7	60583.7
ENSMUSG00000015659	Serac1	0.148693	0.0656102	0.0922183	181.017	230.281	189.909	266.042
ENSMUSG00000015668	Pdzd11	-0.494035	2.55e-06	5.96e-06	211.981	187.918	137.065	146.877
ENSMUSG00000015671	Psma2	0.0924759	0.000453645	0.000879696	2904.61	2246.32	2720.65	2771.27
ENSMUSG00000015672	Mrpl32	0.437046	5.06e-14	1.64e-13	513.28	473.596	611.837	724.225
ENSMUSG00000015697	Setdb1	0.208935	1.3e-09	3.63e-09	1631.54	1446.86	1743.86	1814.26
ENSMUSG00000015702	Anxa9	-0.365772	0.369901	0.411224	1.1909	0	0	0.923757
ENSMUSG00000015711	Prune1	-0.189849	0.115215	0.151989	102.418	90.157	71.8351	96.9945
ENSMUSG00000015714	Cers2	-0.0256666	0.273842	0.323463	1386.21	1078.63	1149.36	1272.01
ENSMUSG00000015733	Capza2	0.191548	1.35e-13	4.32e-13	2750.99	2789.44	2906.43	3420.67
ENSMUSG00000015745	Plekho1	-0.411048	4.86e-12	1.48e-11	696.679	568.098	453.304	497.905
ENSMUSG00000015747	Vps45	-0.186217	0.0108561	0.0176529	344.171	321.524	284.863	300.221
ENSMUSG00000015748	Prpf3	0.152451	9.25e-06	2.08e-05	1557.7	1519.63	1605.14	1815.18
ENSMUSG00000015749	Anp32e	0.0495599	2.66e-05	5.79e-05	14226.5	12900.1	13534.7	14539.9
ENSMUSG00000015750	Aph1a	-0.0643301	0.109196	0.144823	849.114	747.326	732.387	794.431
ENSMUSG00000015755	Tab2	0.290498	1.55e-28	6.77e-28	2603.32	2641.71	2967.53	3447.46
ENSMUSG00000015757	Ppil4	0.176839	2.6e-08	6.84e-08	1856.62	1782.5	1942.85	2170.83
ENSMUSG00000015759	Cnih1	-0.0146611	0.397154	0.436556	666.906	714.739	648.993	718.683
ENSMUSG00000015766	Eps8	-0.0465865	0.174852	0.219991	906.278	811.413	767.066	896.044
ENSMUSG00000015776	Med22	0.0722911	0.0742801	0.103236	883.651	767.964	857.067	879.417
ENSMUSG00000015790	Surf1	-0.239701	0.00243502	0.00433512	298.917	321.524	250.184	275.28
ENSMUSG00000015804	Med28	0.0662852	0.0820454	0.112687	981.305	788.603	901.654	951.47
ENSMUSG00000015806	Qdpr	0.0307763	0.317734	0.365991	568.061	528.994	535.047	585.662
ENSMUSG00000015812	Gnrh1	0.289744	0.118282	0.155587	39.2998	31.5007	41.2845	45.2641
ENSMUSG00000015829	Tnr	-0.352474	0.247647	0.296689	17.8636	8.68984	11.5597	9.23757
ENSMUSG00000015837	Sqstm1	0.767758	2.43e-130	1.62e-129	1369.54	1526.15	2292.94	2637.33
ENSMUSG00000015839	Nfe2l2	0.866572	6.56e-196	4.69e-195	1670.84	1604.36	2849.46	3122.3
ENSMUSG00000015846	Rxra	10.4374	0	0	0	0	0	2.77127
ENSMUSG00000015850	Adamtsl4	0.577735	7.06e-06	1.6e-05	103.609	80.381	137.89	136.716
ENSMUSG00000015852	Fcrls	-9.22026	0	0	1.1909	0	0	0
ENSMUSG00000015854	Cd5l	10.7325	0	0	0	0	2.47707	0.923757
ENSMUSG00000015869	Prpsap1	-0.306263	1.42e-06	3.37e-06	539.479	508.355	393.854	453.565
ENSMUSG00000015879	Fam184b	0.468833	0.00646103	0.0108906	38.1089	58.6564	70.1837	63.7392
ENSMUSG00000015880	Ncapg	-0.0562399	0.0364821	0.053885	2153.15	2213.74	1986.61	2213.32
ENSMUSG00000015882	Lcorl	0.450863	3.48e-45	1.76e-44	1521.97	1758.61	2106.34	2377.75
ENSMUSG00000015889	Lta4h	-0.280078	1.42e-25	5.92e-25	3273.79	2825.28	2353.22	2669.66
ENSMUSG00000015890	Amdhd1	-0.81803	0.236221	0.285058	0	3.25869	0	1.84751
ENSMUSG00000015932	Dstn	0.204706	2.34e-05	5.14e-05	750.269	763.619	873.58	871.103
ENSMUSG00000015937	H2afy	-0.117699	7.05e-15	2.35e-14	9684.43	8607.28	8025.71	8832.96
ENSMUSG00000015942	Gtf2ird2	0.246182	5.07e-05	0.000107909	515.661	409.508	498.717	598.594
ENSMUSG00000015943	Bola1	-0.479683	2.21e-10	6.35e-10	465.643	326.955	293.12	275.28
ENSMUSG00000015944	Castor2	1.08507	1.38e-07	3.48e-07	25.009	31.5007	56.1469	63.7392
ENSMUSG00000015947	Fcgr1	-1.47185	4.3e-05	9.2e-05	32.1544	9.77606	4.95414	10.1613
ENSMUSG00000015950	Ncf1	0.775115	1.05e-12	3.27e-12	115.518	122.744	214.679	193.065
ENSMUSG00000015961	Adss	0.381634	2.24e-40	1.09e-39	2243.66	1959.56	2667.81	2808.22
ENSMUSG00000015962	1700016C15Rik	1.36355	0.000472697	0.000913973	2.38181	11.9485	23.945	12.9326
ENSMUSG00000015966	Il17rb	1.48982	4.16e-06	9.57e-06	11.909	7.60361	36.3304	18.4751
ENSMUSG00000015968	Cacna1d	-0.363132	0.150009	0.191791	21.4363	22.8108	21.4679	12.9326
ENSMUSG00000015971	Actr8	0.138364	0.0453357	0.0658905	304.871	291.109	333.579	322.391
ENSMUSG00000015980	Lrrc27	-0.806942	0.0120848	0.0194944	15.4817	29.3282	9.90828	15.7039
ENSMUSG00000015981	Stk32c	-9.22026	0	0	1.1909	0	0	0
ENSMUSG00000015994	Fnta	-0.211824	1.41e-05	3.15e-05	936.05	782.085	715.873	767.642
ENSMUSG00000016018	Mtrex	0.256968	3.62e-24	1.48e-23	2934.39	2751.42	3187.99	3606.35
ENSMUSG00000016028	Celsr1	-0.0796367	0.000107401	0.000221949	4679.06	4531.75	4242.4	4473.75
ENSMUSG00000016087	Fli1	0.549907	1.9e-100	1.2e-99	2623.56	2180.06	3485.24	3547.23
ENSMUSG00000016128	Stard13	11.3849	0	0	0	0	1.65138	3.69503
ENSMUSG00000016179	Camk1g	1.81201	1.77e-05	3.93e-05	2.38181	6.51738	9.08259	22.1702
ENSMUSG00000016181	Utp25	-0.0235613	0.302024	0.350707	1062.29	985.21	1061.01	953.317
ENSMUSG00000016194	Hsd11b1	0.213832	0.0164956	0.026019	182.208	198.78	184.129	257.728
ENSMUSG00000016200	Syt14	-1.39493	0.128975	0.167456	0	6.51738	2.47707	0
ENSMUSG00000016206	H2-M3	0.414003	3.86e-16	1.34e-15	603.788	697.359	803.397	930.223
ENSMUSG00000016252	Atp5e	-0.0901019	0.0170568	0.0268469	1369.54	979.779	1226.98	980.106
ENSMUSG00000016253	Nelfcd	0.0154613	0.34071	0.386015	1541.03	1466.41	1402.02	1637.82
ENSMUSG00000016255	Tubb1	9.85293	0	0	0	0	0	1.84751
ENSMUSG00000016256	Ctsz	-0.0793254	0.00318981	0.00559305	2487.8	2546.12	2311.11	2453.5
ENSMUSG00000016257	Prelid3b	0.357321	6.73e-23	2.69e-22	1450.52	1195.94	1601.84	1788.39
ENSMUSG00000016283	H2-M2	-9.22026	0	0	1.1909	0	0	0
ENSMUSG00000016308	Ube2a	-0.15812	0.00769354	0.0128088	552.579	467.079	464.864	448.946
ENSMUSG00000016319	Slc25a5	0.0969919	5.06e-10	1.43e-09	8293.45	7523.22	7919.2	8997.39
ENSMUSG00000016327	Atp1b4	-1.23195	0.369901	0.411224	0	2.17246	0	0.923757
ENSMUSG00000016344	Ppdpf	-0.219073	0.000598412	0.00114441	510.898	450.785	416.974	409.224
ENSMUSG00000016346	Kcnq2	-0.365772	0.369901	0.411224	1.1909	0	0	0.923757
ENSMUSG00000016356	Col20a1	1.36475	3.3e-09	9.04e-09	4.76361	34.7593	68.5323	33.2552
ENSMUSG00000016409	Nkap	-0.0883854	0.00726933	0.0121678	1630.35	1649.98	1454.04	1631.35
ENSMUSG00000016427	Ndufa1	-0.1519	0.00117237	0.00217381	938.432	795.12	885.966	674.343
ENSMUSG00000016477	E2f3	0.967067	0	0	2523.53	2462.48	4779.92	4967.04
ENSMUSG00000016481	Cr1l	-0.0470293	0.123993	0.161708	1324.28	1271.97	1179.09	1333.9
ENSMUSG00000016487	Ppfibp1	0.33435	1.58e-05	3.5e-05	248.899	315.007	313.762	397.215
ENSMUSG00000016493	Cd46	-0.509546	1.77e-05	3.92e-05	147.672	159.676	118.899	96.9945
ENSMUSG00000016495	Plgrkt	-0.192135	0.0143353	0.0228416	302.49	267.212	211.377	287.288
ENSMUSG00000016496	Cd274	0.525796	0.000495208	0.000955387	71.4542	60.8288	84.2204	106.232
ENSMUSG00000016498	Pdcd1lg2	-0.907805	0.236221	0.285058	2.38181	1.08623	0	1.84751
ENSMUSG00000016503	Gtf3a	-0.656856	2.05e-11	6.13e-11	273.908	216.16	136.239	174.59
ENSMUSG00000016510	Mtif3	-0.260111	0.000323206	0.000636951	421.58	350.852	317.065	327.934
ENSMUSG00000016520	Lnx2	0.0555655	0.087521	0.119373	1227.82	1231.78	1157.62	1398.57
ENSMUSG00000016526	Dyrk3	1.51936	1.79e-301	1.34e-300	550.198	644.134	1662.11	1761.6
ENSMUSG00000016528	Mapkapk2	0.637346	9.9e-102	6.31e-101	1725.62	1745.57	2512.58	2886.74
ENSMUSG00000016529	Il10	-9.08777	0	0	0	1.08623	0	0
ENSMUSG00000016534	Lamp2	0.343053	2.01e-19	7.52e-19	1149.22	1263.28	1355.78	1704.33
ENSMUSG00000016541	Atxn10	-0.121084	0.00117234	0.00217381	1348.1	1346.92	1193.12	1284.95
ENSMUSG00000016552	Foxred2	1.78296	2.38e-12	7.32e-12	7.14542	19.5521	58.624	33.2552
ENSMUSG00000016554	Eif3d	0.291019	6.61e-22	2.6e-21	2091.23	1821.61	2251.66	2535.71
ENSMUSG00000016559	H3f3b	0.194481	8.8e-67	5.02e-66	16361.8	13485.5	17315.6	16839.2
ENSMUSG00000016619	Nup50	0.43045	1.43e-80	8.61e-80	3435.76	3175.05	4329.09	4579.99
ENSMUSG00000016624	Phf21b	0.200144	0.00517692	0.00882743	314.399	326.955	360.827	375.969
ENSMUSG00000016626	Nlrp14	-10.0864	0	0	0	2.17246	0	0
ENSMUSG00000016637	Ift27	-0.200344	0.00475147	0.00814151	385.853	356.283	278.258	367.655
ENSMUSG00000016664	Pacsin2	0.119197	2.6e-06	6.07e-06	2977.26	2801.39	2936.98	3339.38
ENSMUSG00000016756	Cmah	0.0731547	0.0405117	0.0593949	734.788	1545.7	854.589	1544.52
ENSMUSG00000016757	Ttll12	-0.385331	5.61e-19	2.08e-18	1243.3	1142.71	882.663	944.08
ENSMUSG00000016758	Bik	-2.5255	0.0650289	0.0915214	4.76361	0	0.82569	0
ENSMUSG00000016831	Tox4	0.381736	3.1e-37	1.47e-36	1974.52	1881.35	2306.15	2717.69
ENSMUSG00000016833	Mrps18c	0.0812966	0.0480198	0.0694562	971.777	698.445	926.425	840.619
ENSMUSG00000016921	Srsf6	0.639782	0	0	6399.92	5887.36	9132.13	10012.6
ENSMUSG00000016933	Plcg1	-0.161818	1.96e-05	4.32e-05	1340.96	1463.15	1116.33	1390.25
ENSMUSG00000016940	Kctd2	-0.293452	0.000134003	0.00027477	356.08	326.955	238.624	318.696
ENSMUSG00000016942	Tmprss6	10.2756	0	0	0	0	2.47707	0
ENSMUSG00000016946	Kctd5	0.395527	1.96e-20	7.51e-20	949.15	918.95	1157.62	1299.73
ENSMUSG00000016982	Pom121l2	-1.11241	0.200471	0.247532	3.57271	0	1.65138	0
ENSMUSG00000016984	Etaa1	0.457973	1.35e-31	6.07e-31	1134.93	1034.09	1421.01	1558.38
ENSMUSG00000016995	Matn4	10.2756	0	0	0	0	2.47707	0
ENSMUSG00000017002	Slpi	9.85293	0	0	0	0	0	1.84751
ENSMUSG00000017007	Rbpjl	0.544043	0.18664	0.233024	2.38181	11.9485	10.734	10.1613
ENSMUSG00000017009	Sdc4	0.402517	2.48e-92	1.54e-91	4933.91	3881.1	5510.66	6141.14
ENSMUSG00000017057	Il13ra1	0.58168	0.194958	0.242107	2.38181	8.68984	8.2569	8.31381
ENSMUSG00000017119	Nbr1	-0.133695	0.00062297	0.00118936	1238.54	1277.41	999.085	1294.18
ENSMUSG00000017132	Cyth1	-0.201244	2.94e-18	1.07e-17	4203.89	3832.22	3066.61	3923.2
ENSMUSG00000017146	Brca1	0.453969	1.52e-75	9.03e-75	2717.64	2788.35	3588.45	3953.68
ENSMUSG00000017167	Cntnap1	-0.153625	0.257266	0.306175	47.6361	42.3629	42.1102	38.7978
ENSMUSG00000017176	Nt5c3b	0.154977	0.00302908	0.00532968	575.207	636.53	696.057	653.096
ENSMUSG00000017188	Coa3	-0.416991	7.92e-08	2.03e-07	421.58	304.144	292.294	251.262
ENSMUSG00000017195	Zpbp2	0.100792	0.350727	0.395734	42.8725	33.6731	32.2019	49.8829
ENSMUSG00000017210	Med24	-0.117602	0.00124398	0.00230018	1407.65	1417.53	1213.76	1390.25
ENSMUSG00000017221	Psmd3	0.19373	1.59e-10	4.6e-10	2185.31	1823.78	2156.7	2428.56
ENSMUSG00000017264	Exosc10	0.206148	2.99e-10	8.56e-10	1749.44	1661.93	1919.73	2015.64
ENSMUSG00000017286	Glod4	-0.0139177	0.439113	0.472299	339.408	310.662	272.478	371.35
ENSMUSG00000017288	Vps53	0.0739653	0.0902784	0.122777	674.052	651.738	601.103	794.431
ENSMUSG00000017291	Taok1	0.40733	3.97e-72	2.32e-71	3339.29	3331.47	4268.82	4578.14
ENSMUSG00000017299	Dnttip1	0.106082	0.072268	0.100621	403.716	354.111	365.781	449.87
ENSMUSG00000017307	Acot8	-0.298254	0.00262763	0.00465394	227.463	164.021	181.652	136.716
ENSMUSG00000017309	Cd300lg	9.6912	0	0	0	0	1.65138	0
ENSMUSG00000017314	Mpp2	1.61098	1.79e-41	8.8e-41	60.7361	72.7774	175.046	232.787
ENSMUSG00000017344	Vtn	11.275	0	0	0	0	4.95414	0
ENSMUSG00000017376	Nlk	-0.218663	6.37e-05	0.000134303	688.342	654.996	523.488	630.926
ENSMUSG00000017386	Traf4	0.877423	1.57e-200	1.12e-199	1742.29	1513.12	2775.97	3204.51
ENSMUSG00000017390	Aldoc	-0.24526	5.29e-05	0.000112354	482.316	616.978	404.588	522.846
ENSMUSG00000017400	Stac2	-0.148209	0.00399114	0.00690755	716.924	656.083	573.855	665.105
ENSMUSG00000017404	Rpl19	-0.0330233	0.00297258	0.00523409	16082	13148.8	14425.6	14143.6
ENSMUSG00000017405	Nek8	0.318291	0.000592418	0.00113384	202.454	167.279	194.037	266.966
ENSMUSG00000017412	Cacnb4	-0.527674	0.280009	0.329757	1.1909	6.51738	1.65138	3.69503
ENSMUSG00000017417	Plxdc1	-0.075493	0.21049	0.258198	326.308	206.384	246.881	258.652
ENSMUSG00000017418	Arl5b	1.33653	1.61e-229	1.17e-228	652.615	632.185	1489.55	1755.14
ENSMUSG00000017421	Zfp207	0.360699	6.3e-74	3.71e-73	4523.05	4389.45	5276.16	6167.92
ENSMUSG00000017428	Psmd11	0.376184	1.7e-39	8.26e-39	2155.54	2076.87	2647.16	2846.09
ENSMUSG00000017446	C1qtnf1	-1.55162	0.0231582	0.0355326	8.33633	4.34492	2.47707	1.84751
ENSMUSG00000017453	Pipox	-0.262128	0.0469696	0.0680495	88.1269	106.45	88.3489	73.9006
ENSMUSG00000017466	Timp2	10.4374	0	0	0	0	0	2.77127
ENSMUSG00000017478	Zc3h18	0.347663	6.29e-53	3.35e-52	3583.43	3240.22	4108.63	4574.44
ENSMUSG00000017485	Top2b	-0.0574607	5.11e-05	0.000108676	9273.57	10028.1	8408.83	10139.2
ENSMUSG00000017491	Rarb	0.0881451	0.638666	0.655377	0	4.34492	0	4.61878
ENSMUSG00000017493	Igfbp4	-0.022264	0.263728	0.312784	1845.9	1600.02	1701.75	1691.4
ENSMUSG00000017499	Cdc6	1.04142	0	0	1707.76	1598.93	3237.53	3568.47
ENSMUSG00000017548	Suz12	0.256938	5.45e-42	2.69e-41	5220.92	5031.41	5607.26	6643.66
ENSMUSG00000017550	Atad5	0.751281	9.07e-243	6.62e-242	2949.87	2772.06	4677.54	4954.11
ENSMUSG00000017561	Crlf3	-0.466838	1.59e-71	9.25e-71	3475.06	3282.59	2286.34	2603.15
ENSMUSG00000017615	Tnfaip1	0.656553	7e-46	3.55e-45	734.788	693.014	1015.6	1235.06
ENSMUSG00000017631	Abr	0.079531	0.0141795	0.0226139	1599.38	1478.36	1488.72	1763.45
ENSMUSG00000017639	Rab11fip4	-1.20035	0.00957305	0.0157004	22.6272	2.17246	2.47707	8.31381
ENSMUSG00000017652	Cd40	7.21923	3.39e-143	2.29e-142	0	1.08623	89.1746	72.9768
ENSMUSG00000017664	Slc35c2	-0.30982	1.89e-05	4.16e-05	439.443	347.593	316.239	318.696
ENSMUSG00000017670	Elmo2	0.00502602	0.472232	0.499824	596.643	583.305	577.158	606.908
ENSMUSG00000017677	Wsb1	1.57801	0	0	1612.48	1615.22	4534.69	5101.91
ENSMUSG00000017679	Ttpal	0.715741	6.1e-114	3.98e-113	1586.28	1392.55	2278.91	2613.31
ENSMUSG00000017686	Rhot1	0.0865178	0.0298551	0.0448642	946.768	959.141	974.315	1049.39
ENSMUSG00000017692	Rhbdl3	0.592898	2.59e-13	8.2e-13	266.762	204.211	350.093	360.265
ENSMUSG00000017697	Ada	-0.544602	4.33e-16	1.5e-15	578.779	446.44	350.918	351.951
ENSMUSG00000017707	Serinc3	0.0393917	6.86e-14	2.22e-13	68101.8	76095.8	64158.6	84030.5
ENSMUSG00000017713	Tha1	1.50623	0.000439177	0.000853531	9.52723	0	13.211	13.8564
ENSMUSG00000017715	Pgs1	0.614147	5.8e-61	3.22e-60	1149.22	1081.88	1579.55	1835.5
ENSMUSG00000017716	Birc5	0.0507022	0.0267297	0.0405281	3120.17	2856.78	2989	3201.74
ENSMUSG00000017718	Afmid	0.493989	0.000186888	0.000377173	90.5087	82.5534	141.193	102.537
ENSMUSG00000017720	Trp53tg5	1.03586	0.00189728	0.00342528	11.909	9.77606	22.2936	22.1702
ENSMUSG00000017721	Pigt	-0.00946924	0.41769	0.454825	1223.06	1205.71	1228.63	1184.26
ENSMUSG00000017724	Etv4	-0.145974	0.0888324	0.120964	189.354	207.47	169.267	189.37
ENSMUSG00000017734	Dbndd2	0.473702	0.00409123	0.00706618	58.3543	53.2252	48.7157	106.232
ENSMUSG00000017737	Mmp9	2.82533	0.00326903	0.00571686	1.1909	0	6.60552	1.84751
ENSMUSG00000017740	Slc12a5	0.668574	3.33e-06	7.7e-06	91.6996	51.0528	142.844	84.0619
ENSMUSG00000017747	Ghdc	0.365639	0.00314304	0.00551695	104.8	90.157	117.248	133.945
ENSMUSG00000017754	Pltp	-0.591112	1.65e-05	3.66e-05	103.609	136.865	79.2663	80.3668
ENSMUSG00000017756	Slc12a7	0.261068	5.3e-05	0.000112508	438.253	386.698	457.432	531.16
ENSMUSG00000017760	Ctsa	-0.168982	0.000416021	0.000810655	925.332	772.309	679.543	830.457
ENSMUSG00000017764	Zswim1	-0.236868	0.00489455	0.00837772	245.326	284.592	188.257	261.423
ENSMUSG00000017765	Slc12a4	0.952474	1.78e-07	4.46e-07	44.0634	33.6731	86.6975	63.7392
ENSMUSG00000017767	Spata25	-1.32374	0.0127241	0.0204384	0	15.2072	3.30276	2.77127
ENSMUSG00000017774	Myo1c	-0.334646	6.19e-35	2.89e-34	3211.87	2836.14	2187.25	2608.69
ENSMUSG00000017776	Crk	0.260615	2.38e-15	8.05e-15	1689.89	1656.5	1953.58	2055.36
ENSMUSG00000017778	Cox7c	0.293286	2.81e-25	1.17e-24	2683.11	1821.61	2879.18	2641.02
ENSMUSG00000017781	Pitpna	-0.0517817	0.0129307	0.020753	4141.96	3689.92	3566.98	3988.78
ENSMUSG00000017801	Mlx	-0.513523	1.76e-10	5.08e-10	363.226	338.904	222.111	269.737
ENSMUSG00000017802	Retreg3	0.033649	0.254425	0.303438	838.396	783.171	786.883	872.95
ENSMUSG00000017817	Jph2	10.7735	0	0	0	0	1.65138	1.84751
ENSMUSG00000017830	Dhx58	0.169724	0.137411	0.177344	82.1724	99.9331	87.5232	117.317
ENSMUSG00000017831	Rab5a	0.660706	1.22e-63	6.85e-63	972.968	1003.68	1487.89	1636.9
ENSMUSG00000017832	Hspb9	-0.098834	0.359835	0.40414	28.5817	18.4659	18.9909	24.9414
ENSMUSG00000017837	Nkiras2	-0.373344	6.66e-11	1.96e-10	719.306	628.927	492.111	548.712
ENSMUSG00000017843	Ppp2r5c	0.0329394	0.126178	0.164212	2559.25	2500.5	2404.41	2772.19
ENSMUSG00000017858	Ift52	-0.043091	0.244117	0.293117	556.152	577.874	509.451	591.204
ENSMUSG00000017861	Mybl2	1.40262	0	0	2755.75	2486.38	6735.16	7124.01
ENSMUSG00000017897	Eya2	10.3316	0	0	0	0	1.65138	0.923757
ENSMUSG00000017929	B4galt5	0.431384	1.67e-24	6.84e-24	1024.18	865.725	1174.96	1373.63
ENSMUSG00000017943	Gdap1l1	-10.2191	0	0	2.38181	0	0	0
ENSMUSG00000017969	Ptgis	-12.0854	0	0	0	8.68984	0	0
ENSMUSG00000017999	Ddx27	0.19757	2.01e-18	7.37e-18	3798.98	3547.63	4089.64	4335.19
ENSMUSG00000018001	Cyth3	0.233761	0.000157361	0.000320175	439.443	449.699	491.286	554.254
ENSMUSG00000018008	Cyth4	-0.314653	0.00183208	0.00331503	215.554	181.4	159.358	159.81
ENSMUSG00000018012	Rac3	0.554603	0.000744528	0.00140998	42.8725	63.0013	75.1378	80.3668
ENSMUSG00000018040	Rrp7a	0.349877	5.56e-23	2.23e-22	1487.44	1288.27	1691.84	1845.67
ENSMUSG00000018042	Cyb5r3	0.274301	8.71e-14	2.8e-13	1429.08	1222.01	1463.12	1743.13
ENSMUSG00000018068	Ints2	0.0257764	0.229137	0.278148	1732.76	1835.73	1667.07	1965.75
ENSMUSG00000018076	Med13l	0.443297	2.95e-134	1.98e-133	5325.72	5120.49	6913.5	7290.29
ENSMUSG00000018102	Hist1h2bc	-1.01745	0	0	5943.8	5295.37	2657.9	2894.13
ENSMUSG00000018126	Baiap2l2	-1.3618	0.0586337	0.0833802	9.52723	1.08623	4.12845	0
ENSMUSG00000018143	Mafk	0.896334	1.43e-222	1.03e-221	1832.8	1600.02	3165.7	3223.91
ENSMUSG00000018160	Med1	0.353036	1.53e-71	8.92e-71	4425.4	4600.18	5542.86	5985.02
ENSMUSG00000018166	Erbb3	0.97674	0.093601	0.126572	4.76361	0	6.60552	2.77127
ENSMUSG00000018167	Stard3	0.00532819	0.48071	0.507514	309.635	351.938	304.68	359.341
ENSMUSG00000018168	Ikzf3	0.1401	1.24e-23	5.03e-23	9515.32	10164.9	9735.71	11951.6
ENSMUSG00000018169	Mfng	0.0647146	0.105642	0.140622	870.551	657.169	725.782	872.027
ENSMUSG00000018171	Vmp1	0.658311	4.05e-76	2.4e-75	1255.21	1141.63	1851.2	1931.58
ENSMUSG00000018189	Uchl5	0.0184903	0.242591	0.291594	3210.68	2726.44	2916.34	3097.36
ENSMUSG00000018196	Glrx2	-0.185208	0.0123183	0.0198412	350.126	304.144	249.358	326.086
ENSMUSG00000018199	Ro60	-0.056011	0.275986	0.325509	225.081	240.057	207.248	240.177
ENSMUSG00000018209	Stk4	0.433822	1.4e-186	9.97e-186	8005.25	7298.38	10620.9	10051.4
ENSMUSG00000018238	Gdf9	-1.07324	0.0827112	0.113455	7.14542	5.43115	4.12845	1.84751
ENSMUSG00000018239	Zcchc10	0.186008	0.00379189	0.00657986	441.825	350.852	457.432	444.327
ENSMUSG00000018286	Psmb6	0.0271949	0.193014	0.240002	2194.84	1967.16	2098.08	2143.12
ENSMUSG00000018287	Spag7	0.0218555	0.240338	0.289175	2107.9	2374.5	2127.8	2423.01
ENSMUSG00000018293	Pfn1	-0.0522213	0.000715712	0.00135714	8573.32	7113.72	7240.48	7888.88
ENSMUSG00000018322	Tomm34	0.307989	2.39e-21	9.31e-21	1735.15	1632.6	1980.83	2188.38
ENSMUSG00000018326	Ywhab	0.136565	8.86e-08	2.26e-07	3105.88	2633.02	3045.97	3262.71
ENSMUSG00000018334	Ksr1	0.196044	0.0315812	0.0472516	215.554	146.641	193.212	221.702
ENSMUSG00000018339	Gpx3	1.4497	1.4e-06	3.32e-06	13.0999	8.68984	35.5047	24.0177
ENSMUSG00000018340	Anxa6	-0.285993	9.96e-10	2.79e-09	1055.14	911.346	738.993	873.874
ENSMUSG00000018341	Il12rb2	0.828288	0.0062149	0.010506	10.7181	16.2934	23.945	24.0177
ENSMUSG00000018347	Zkscan6	-0.0742575	0.157842	0.200873	423.962	398.646	304.68	476.659
ENSMUSG00000018362	Kpna2	-0.144791	3.92e-12	1.2e-11	4981.55	4644.72	3953.41	4753.65
ENSMUSG00000018363	Smurf2	0.48672	3.08e-29	1.35e-28	846.733	903.743	1164.22	1288.64
ENSMUSG00000018372	Cep95	-0.0116688	0.456395	0.485822	396.571	266.126	306.331	351.028
ENSMUSG00000018377	Vezf1	0.486801	2.62e-53	1.4e-52	1668.46	1621.74	2129.46	2481.21
ENSMUSG00000018378	Cuedc1	0.156605	0.0445197	0.0648122	248.899	227.022	231.193	299.297
ENSMUSG00000018379	Srsf1	0.157309	3.37e-23	1.36e-22	7859.96	7339.65	7849.84	9100.85
ENSMUSG00000018381	Abi3	-1.05615	4.91e-12	1.5e-11	130.999	89.0708	57.7983	48.0354
ENSMUSG00000018387	Shroom1	0.470941	0.448687	0.478798	1.1909	0	1.65138	0
ENSMUSG00000018395	Kif3a	-0.263361	3.37e-05	7.27e-05	519.234	496.407	373.212	472.964
ENSMUSG00000018398	2022-09-08	2.42707	5.65e-09	1.53e-08	4.76361	2.17246	28.0735	9.23757
ENSMUSG00000018401	Mtmr4	-0.238766	5.91e-10	1.67e-09	1518.4	1350.18	1207.98	1223.05
ENSMUSG00000018405	Mrm1	0.0976371	0.0579199	0.0824931	571.634	459.475	580.46	522.846
ENSMUSG00000018411	Mapt	1.1704	3.33e-09	9.12e-09	35.7271	23.897	83.3947	50.8066
ENSMUSG00000018412	Kansl1	0.533644	1.69e-129	1.13e-128	3366.68	3288.02	4703.13	4930.09
ENSMUSG00000018415	Gid4	-0.0363156	0.156267	0.199053	1635.11	1660.84	1421.01	1793.01
ENSMUSG00000018425	Dhx40	0.213768	0.000170014	0.000344465	535.907	540.942	615.139	633.697
ENSMUSG00000018427	Ypel2	-0.246007	0.044291	0.0645086	119.09	107.537	71.0094	120.088
ENSMUSG00000018428	Akap1	0.334174	7.85e-18	2.84e-17	1215.91	1106.87	1486.24	1441.98
ENSMUSG00000018433	Nol11	0.427367	8.92e-38	4.26e-37	1604.15	1450.12	1996.52	2110.78
ENSMUSG00000018442	Derl2	0.379722	2.63e-13	8.34e-13	652.615	612.633	753.855	892.349
ENSMUSG00000018446	C1qbp	0.096449	0.000414726	0.000808215	2568.78	2250.67	2528.26	2624.39
ENSMUSG00000018449	Rpain	0.60031	1.65e-10	4.78e-10	185.781	162.934	254.313	274.356
ENSMUSG00000018451	6330403K07Rik	0.925297	0.00142287	0.0026124	15.4817	14.121	32.2019	24.0177
ENSMUSG00000018459	Slc13a3	-1.36456	0.369901	0.411224	2.38181	0	0	0.923757
ENSMUSG00000018470	Kcnab3	-0.993833	0.0412249	0.060367	7.14542	10.8623	1.65138	7.39006
ENSMUSG00000018474	Chd3	-0.0172911	0.145017	0.186125	8164.84	7571.02	7508	8040.38
ENSMUSG00000018476	Kdm6b	2.88529	0	0	1025.37	874.415	6882.13	7154.5
ENSMUSG00000018479	1700125H20Rik	11.275	0	0	0	0	4.95414	0
ENSMUSG00000018481	Appbp2	0.487903	4.76e-57	2.59e-56	1737.53	1770.55	2451.47	2468.28
ENSMUSG00000018500	Adora2b	1.13829	0.0187074	0.0291731	2.38181	5.43115	10.734	6.4663
ENSMUSG00000018501	Ncor1	0.071984	2.32e-08	6.11e-08	11578	11677	11586.9	12857.8
ENSMUSG00000018507	Trpv2	0.0109105	0.401683	0.440529	1219.49	1142.71	1115.51	1264.62
ENSMUSG00000018509	Cenpv	0.877978	0.00294789	0.00519346	25.009	3.25869	21.4679	30.484
ENSMUSG00000018537	Pcgf2	0.284215	0.00748085	0.0125001	147.672	119.485	123.028	202.303
ENSMUSG00000018541	Cwc25	0.0629476	0.0938994	0.126957	900.323	879.846	785.231	1074.33
ENSMUSG00000018543	1700001P01Rik	0.497628	0.0309606	0.0463879	34.5362	18.4659	38.8074	36.0265
ENSMUSG00000018547	Pip4k2b	-0.333013	1.09e-20	4.19e-20	1786.36	1692.35	1340.92	1420.74
ENSMUSG00000018548	Trim37	-0.114043	7.03e-05	0.000147727	2277.01	2486.38	2048.54	2352.81
ENSMUSG00000018554	Ybx2	-2.38549	1.11e-05	2.49e-05	10.7181	10.8623	4.12845	0
ENSMUSG00000018559	Ctdnep1	0.312097	4.67e-12	1.43e-11	947.959	777.74	977.617	1164.86
ENSMUSG00000018565	Elp5	0.524509	1.49e-24	6.12e-24	670.479	549.632	801.745	953.317
ENSMUSG00000018566	Slc2a4	8.69295	1	1	0	0	0.82569	0
ENSMUSG00000018567	Gabarap	0.159727	0.000441226	0.000856995	891.987	790.775	895.048	984.725
ENSMUSG00000018569	Cldn7	1.82104	0.000169221	0.000343075	0	7.60361	14.8624	12.0088
ENSMUSG00000018570	2810408A11Rik	-1.0598	9.68e-08	2.46e-07	89.3178	41.2767	24.7707	37.874
ENSMUSG00000018572	Phf23	0.4711	1.54e-44	7.75e-44	1520.78	1407.75	1971.75	2087.69
ENSMUSG00000018574	Acadvl	-0.0581945	0.260831	0.309748	239.372	329.128	255.964	290.06
ENSMUSG00000018581	Dnah11	-0.314709	0.0970823	0.13061	44.0634	42.3629	37.1561	32.3315
ENSMUSG00000018583	G3bp1	0.409256	1.22e-171	8.5e-171	8069.56	7915.35	10017.3	11210.7
ENSMUSG00000018585	Atox1	-0.333757	1.37e-06	3.25e-06	483.507	408.422	317.891	389.825
ENSMUSG00000018593	Sparc	8.69295	1	1	0	0	0.82569	0
ENSMUSG00000018595	Glra4	0.592561	0.0301206	0.0452385	16.6727	19.5521	22.2936	32.3315
ENSMUSG00000018599	Mief2	-0.257655	0.0094013	0.0154424	200.072	162.934	134.588	169.048
ENSMUSG00000018648	Dusp14	1.15397	0.0695513	0.0971901	0	4.34492	4.12845	5.54254
ENSMUSG00000018651	Tada2a	-0.211785	0.000445591	0.000865125	566.87	519.218	441.744	496.057
ENSMUSG00000018654	Ikzf1	-0.143545	1.9e-21	7.4e-21	9683.24	8928.81	7839.93	9009.4
ENSMUSG00000018659	Pnpo	0.0796455	0.242638	0.291632	215.554	139.037	181.652	193.065
ENSMUSG00000018661	Cog1	0.292899	1.08e-06	2.6e-06	516.852	439.923	537.524	634.621
ENSMUSG00000018666	Cbx1	-0.163048	4.5e-15	1.51e-14	4939.87	4833.72	4179.64	4549.5
ENSMUSG00000018669	Cdk5rap3	-0.16099	0.0131689	0.0211071	409.671	409.508	341.01	391.673
ENSMUSG00000018677	Slc25a39	0.0343871	0.230445	0.279507	1031.32	884.191	920.645	1041.07
ENSMUSG00000018678	Sp2	0.700285	7.54e-61	4.18e-60	926.523	719.084	1271.56	1402.26
ENSMUSG00000018697	Aatf	-0.0984624	0.0012495	0.00230994	2192.45	1827.04	1865.23	1889.08
ENSMUSG00000018698	Lhx1	9.6912	0	0	0	0	1.65138	0
ENSMUSG00000018707	Dync1h1	-0.0725776	5.18e-07	1.27e-06	9371.22	9820.6	8333.69	9916.53
ENSMUSG00000018727	Cpsf4l	-0.0849389	0.388842	0.42879	35.7271	26.0695	30.5505	27.7127
ENSMUSG00000018733	Pex12	0.404017	6.21e-07	1.51e-06	264.381	241.143	333.579	335.324
ENSMUSG00000018736	Ndel1	0.617802	3.08e-36	1.46e-35	682.388	600.685	961.104	1007.82
ENSMUSG00000018740	Slc25a35	-0.761648	9.42e-05	0.000195511	51.2089	68.4325	28.0735	42.4928
ENSMUSG00000018750	Zbtb4	-0.295843	0.000299649	0.000592103	307.253	296.541	222.111	269.737
ENSMUSG00000018761	Mpdu1	0.246746	1.26e-06	3e-06	669.288	687.583	771.195	838.771
ENSMUSG00000018765	Fxr2	0.426926	9.56e-30	4.22e-29	1264.74	1109.04	1511.84	1679.39
ENSMUSG00000018770	Atp5g3	-0.0506937	0.0101584	0.01658	4845.79	4022.31	4374.51	4187.39
ENSMUSG00000018774	Cd68	1.3496	1.22e-24	5.01e-24	60.7361	64.0875	152.753	165.352
ENSMUSG00000018776	Slc35g3	1.99114	0.00751158	0.0125275	2.38181	0	5.77983	3.69503
ENSMUSG00000018796	Acsl1	0.360514	2.86e-20	1.09e-19	1255.21	1009.11	1345.05	1562.07
ENSMUSG00000018809	Smyd4	-0.0448184	0.332737	0.380587	260.808	228.108	217.157	256.804
ENSMUSG00000018819	Lsp1	0.0740067	0.0135456	0.0216657	2003.1	1628.26	1944.5	1878
ENSMUSG00000018820	Zfyve27	0.713929	5.2e-54	2.79e-53	721.688	671.29	1147.71	1137.14
ENSMUSG00000018821	Avpi1	0.621353	0.0215433	0.0332963	22.6272	10.8623	17.3395	34.179
ENSMUSG00000018822	Sfrp5	13.5603	0	0	0	0	6.60552	17.5514
ENSMUSG00000018830	Myh11	0.495488	0.0981544	0.131895	19.0545	6.51738	23.1193	12.9326
ENSMUSG00000018841	Rad51d	-0.261297	0.00170757	0.00310504	263.19	287.851	227.891	231.863
ENSMUSG00000018844	Fndc8	0.285571	0.213623	0.261608	17.8636	13.0348	17.3395	20.3227
ENSMUSG00000018845	Unc45b	8.85449	1	1	0	0	0	0.923757
ENSMUSG00000018846	Pank3	0.677285	8.87e-186	6.29e-185	2704.54	2862.21	3969.09	4932.86
ENSMUSG00000018848	Rars	0.0292665	0.173692	0.218702	2221.04	2110.54	2106.34	2314.01
ENSMUSG00000018849	Wwc1	0.572914	0.087103	0.118862	13.0999	8.68984	14.8624	17.5514
ENSMUSG00000018858	Mrpl58	-0.12443	0.0337557	0.0501775	484.698	432.319	445.873	395.368
ENSMUSG00000018861	Fdxr	-0.173186	0.0240506	0.0367992	285.817	298.713	255.138	263.271
ENSMUSG00000018882	Mrpl45	0.054881	0.144208	0.185199	777.66	801.637	786.057	854.475
ENSMUSG00000018899	Irf1	2.00978	0	0	831.251	724.515	2881.66	3383.72
ENSMUSG00000018900	Slc22a5	-0.247456	0.000553975	0.00106341	378.707	404.077	304.68	354.723
ENSMUSG00000018909	Arrb1	0.261017	0.00124978	0.00231024	253.662	237.884	274.955	314.077
ENSMUSG00000018916	Csf2	9.6912	0	0	0	0	1.65138	0
ENSMUSG00000018920	Cxcl16	1.45363	3.49e-09	9.56e-09	23.8181	8.68984	28.0735	60.968
ENSMUSG00000018921	Pelp1	0.135238	4.06e-05	8.7e-05	1835.18	1516.38	1790.92	1890.01
ENSMUSG00000018923	Med11	0.758415	8.06e-33	3.68e-32	372.753	341.076	589.543	617.993
ENSMUSG00000018925	Heatr9	0.600226	0.000580636	0.00111229	57.1634	34.7593	86.6975	52.6541
ENSMUSG00000018927	Ccl6	0.76876	0.217483	0.265575	4.76361	0	1.65138	6.4663
ENSMUSG00000018931	Natd1	-0.437971	1.6e-12	4.95e-12	554.961	606.116	413.671	443.403
ENSMUSG00000018932	Map2k3	0.130663	0.0125182	0.0201396	585.925	568.098	616.791	646.63
ENSMUSG00000018965	Ywhah	0.189467	4.44e-21	1.72e-20	4920.81	4373.16	5179.56	5418.76
ENSMUSG00000018974	Sart3	0.637549	1.3e-151	8.9e-151	2711.69	2497.24	4104.51	3998.94
ENSMUSG00000018983	E2f2	0.249791	1.5e-25	6.26e-25	3205.91	3193.51	3475.33	4133.81
ENSMUSG00000018986	Slfn3	0.402196	2.31e-17	8.27e-17	772.897	739.722	879.36	1119.59
ENSMUSG00000018995	Nars2	-0.402646	1.23e-07	3.12e-07	372.753	381.267	245.23	325.162
ENSMUSG00000018999	Slc35b4	-0.00188625	0.505791	0.528661	396.571	382.353	333.579	444.327
ENSMUSG00000019027	Dnah1	-0.162134	0.131634	0.170507	123.854	81.4672	88.3489	95.147
ENSMUSG00000019039	Dalrd3	1.04153	1.28e-46	6.55e-46	258.426	219.418	390.552	593.052
ENSMUSG00000019054	Fis1	-0.0248812	0.273813	0.323449	1333.81	1073.19	1150.19	1215.66
ENSMUSG00000019055	Plod1	0.086611	0.473104	0.500609	11.909	1.08623	8.2569	5.54254
ENSMUSG00000019066	Rab3d	-0.494541	0.0754881	0.104756	15.4817	23.897	5.77983	22.1702
ENSMUSG00000019080	Mfsd3	-0.0509065	0.379217	0.420343	71.4542	104.278	88.3489	81.2906
ENSMUSG00000019082	Slc25a22	0.301289	1.25e-05	2.8e-05	352.508	367.146	404.588	482.201
ENSMUSG00000019087	Atp6ap1	0.228815	4.7e-08	1.22e-07	1009.89	1038.44	1100.65	1299.73
ENSMUSG00000019088	Dnase1l1	-0.0115569	0.479072	0.505978	50.018	55.3977	52.8442	51.7304
ENSMUSG00000019102	Aldh3a1	-9.08777	0	0	0	1.08623	0	0
ENSMUSG00000019132	BC005537	0.354542	3.12e-53	1.67e-52	3529.84	3055.56	3858.45	4561.51
ENSMUSG00000019139	Isyna1	0.142294	0.00187017	0.00338077	961.059	683.238	921.47	893.273
ENSMUSG00000019143	Hars2	-0.246955	7.86e-07	1.9e-06	818.151	862.466	683.672	732.539
ENSMUSG00000019158	Tmem160	-0.337474	0.000340527	0.000669511	251.281	208.556	179.175	184.751
ENSMUSG00000019173	Rab5c	-0.110228	7.92e-05	0.000165587	2776	2253.93	2165.79	2494.14
ENSMUSG00000019178	Styxl1	-2.00211	1.38e-06	3.28e-06	16.6727	19.5521	1.65138	7.39006
ENSMUSG00000019179	Mdh2	-0.125978	4.88e-07	1.19e-06	3432.18	3062.08	2664.5	3286.73
ENSMUSG00000019188	H13	0.167483	1.43e-06	3.4e-06	1555.32	1463.15	1603.49	1786.55
ENSMUSG00000019189	Rnf145	-0.600531	3.21e-94	2.01e-93	2853.41	2728.61	1709.18	1972.22
ENSMUSG00000019194	Scn1b	1.16584	0.0482786	0.0697624	0	6.51738	9.08259	5.54254
ENSMUSG00000019210	Atp6v1e1	0.501276	6.2e-32	2.81e-31	972.968	824.448	1250.92	1293.26
ENSMUSG00000019214	Chtf18	-0.370182	3.31e-08	8.66e-08	520.425	449.699	345.964	404.606
ENSMUSG00000019230	Lhx9	1.92529	0.024737	0.0377326	0	2.17246	8.2569	0
ENSMUSG00000019232	Etnppl	0.765709	0.295925	0.34454	0	2.17246	0	3.69503
ENSMUSG00000019235	Rps6kl1	0.959106	1.42e-17	5.12e-17	89.3178	116.227	189.909	209.693
ENSMUSG00000019254	Ppp1r12c	0.228783	3.1e-09	8.52e-09	1227.82	1201.37	1395.42	1451.22
ENSMUSG00000019256	Ahr	-0.582766	8.33e-22	3.27e-21	688.342	576.788	385.597	459.107
ENSMUSG00000019261	Map1s	0.191299	2.78e-05	6.05e-05	912.232	775.568	955.324	971.792
ENSMUSG00000019278	Dpep1	8.69295	1	1	0	0	0.82569	0
ENSMUSG00000019295	Tmem129	-0.514569	7.26e-08	1.86e-07	246.517	245.488	156.881	187.523
ENSMUSG00000019297	Nop9	0.458904	3.96e-34	1.83e-33	1258.79	1091.66	1537.44	1693.25
ENSMUSG00000019301	Hsd17b1	-0.842596	0.182722	0.228711	10.7181	0	4.12845	1.84751
ENSMUSG00000019302	Atp6v0a1	0.605769	3.14e-13	9.94e-13	166.727	279.161	314.588	363.96
ENSMUSG00000019303	Psmc3ip	0.0455892	0.319705	0.367932	247.708	270.471	233.67	301.145
ENSMUSG00000019312	Grb7	0.223875	0.0487108	0.0703446	90.5087	116.227	98.2571	143.182
ENSMUSG00000019320	Noxo1	1.26882	2.14e-06	5.03e-06	16.6727	14.121	36.3304	37.874
ENSMUSG00000019326	Aoc3	1.70001	5.41e-07	1.32e-06	1.1909	14.121	32.2019	17.5514
ENSMUSG00000019338	Zfp687	0.567473	2.44e-52	1.29e-51	1243.3	1038.44	1520.92	1860.45
ENSMUSG00000019359	Gdpd2	12.9993	0	0	0	0	9.90828	6.4663
ENSMUSG00000019362	D8Ertd738e	0.208751	3.74e-09	1.02e-08	1505.3	1389.29	1669.55	1675.69
ENSMUSG00000019370	Calm3	-0.173722	7.22e-12	2.19e-11	3516.74	3034.92	2949.37	2859.03
ENSMUSG00000019373	Cops3	0.523751	3.56e-30	1.58e-29	820.533	715.825	963.581	1245.22
ENSMUSG00000019428	Fkbp8	-0.0425546	0.132691	0.171759	1605.34	1349.1	1350.83	1517.73
ENSMUSG00000019429	Ffar3	11.813	0	0	0	0	1.65138	5.54254
ENSMUSG00000019432	Ddx39b	0.365431	4.88e-101	3.1e-100	6463.03	5466.99	7337.91	8031.14
ENSMUSG00000019433	Gipc1	-0.470902	6.59e-14	2.13e-13	627.606	520.304	376.515	451.717
ENSMUSG00000019437	Tlcd1	1.44936	2.12e-77	1.26e-76	185.781	156.417	438.442	496.057
ENSMUSG00000019461	Plscr3	-0.386177	0.000178602	0.000360916	231.035	160.762	143.67	156.115
ENSMUSG00000019464	Ptger1	-0.346533	0.0603228	0.0855673	51.2089	38.018	31.3762	38.7978
ENSMUSG00000019467	Arhgef25	-0.557499	0.0827196	0.113459	13.0999	16.2934	10.734	9.23757
ENSMUSG00000019470	Xab2	0.601514	6.38e-88	3.93e-87	1869.72	1550.05	2371.38	2817.46
ENSMUSG00000019471	Cdc37	0.00625965	0.382071	0.42302	4843.41	4544.78	4618.09	4810.93
ENSMUSG00000019478	Rab4a	1.32467	2.68e-07	6.65e-07	16.6727	16.2934	28.0735	54.5017
ENSMUSG00000019487	Trip10	0.867105	1.5e-19	5.64e-19	160.772	137.951	288.992	255.881
ENSMUSG00000019489	Cd70	11.0121	0	0	0	0	4.12845	0
ENSMUSG00000019494	Cops6	-0.0769548	0.0556066	0.0794333	1036.09	824.448	820.736	943.156
ENSMUSG00000019505	Ubb	0.147195	2.5e-31	1.13e-30	13400	10688.5	13131	13545
ENSMUSG00000019518	Ap4m1	0.591538	1.31e-18	4.82e-18	373.944	311.748	493.763	539.474
ENSMUSG00000019528	Gyg	-0.0592636	0.323664	0.3718	167.917	114.054	85.8718	184.751
ENSMUSG00000019539	Rcn3	0.0881451	0.638666	0.655377	0	4.34492	0	4.61878
ENSMUSG00000019558	Slc6a8	0.393582	0.0227897	0.0350112	50.018	44.5354	58.624	65.5867
ENSMUSG00000019564	Arid3a	0.0890393	0.0527329	0.0755637	607.361	715.825	672.112	735.31
ENSMUSG00000019578	Ubxn6	0.448729	0.00059883	0.00114509	92.8905	85.8121	116.422	127.478
ENSMUSG00000019579	Mydgf	0.293938	4.76e-11	1.41e-10	903.896	870.07	1078.35	1096.5
ENSMUSG00000019659	Ccdc12	0.0299995	0.204198	0.251441	1686.32	1496.82	1639	1611.03
ENSMUSG00000019689	Fmc1	-0.0962305	0.180042	0.225724	248.899	171.624	180	213.388
ENSMUSG00000019699	Akt3	0.189118	2.76e-11	8.22e-11	2235.33	2346.26	2423.4	2799.91
ENSMUSG00000019710	Mrpl24	0.269138	9.24e-06	2.08e-05	515.661	420.371	535.873	592.128
ENSMUSG00000019715	Gle1	-0.00784931	0.431235	0.465255	1070.62	1123.16	1050.28	1131.6
ENSMUSG00000019718	L3hypdh	0.4846	0.233224	0.282486	7.14542	1.08623	4.12845	7.39006
ENSMUSG00000019726	Lyst	0.125321	1.44e-07	3.64e-07	3391.69	3190.26	3415.88	3763.39
ENSMUSG00000019731	Slc35e1	0.458559	2.94e-60	1.62e-59	2143.63	2119.23	2657.07	3200.82
ENSMUSG00000019732	Calr3	-1.39015	1.19e-09	3.32e-09	52.3998	51.0528	9.90828	29.5602
ENSMUSG00000019734	Tmc4	0.0867616	0.383908	0.424441	35.7271	28.242	34.679	33.2552
ENSMUSG00000019737	Syne4	0.277384	0.248206	0.297211	14.2908	6.51738	13.211	12.0088
ENSMUSG00000019738	Polr2i	-0.387158	4.86e-05	0.000103496	282.244	179.228	163.487	189.37
ENSMUSG00000019756	Prl8a1	1.01164	1.09e-06	2.61e-06	33.3453	22.8108	57.7983	55.4254
ENSMUSG00000019761	Krt10	0.101898	0.224945	0.273663	132.19	106.45	114.771	141.335
ENSMUSG00000019763	Rmnd1	-0.489365	3.02e-16	1.05e-15	647.852	619.151	412.019	490.515
ENSMUSG00000019767	Ccdc170	0.397473	0.215362	0.263503	3.57271	13.0348	2.47707	19.3989
ENSMUSG00000019768	Esr1	0.146783	0.0426454	0.0622813	240.563	303.058	252.661	349.18
ENSMUSG00000019773	Fbxo5	0.479162	1.98e-54	1.06e-53	1874.48	1606.53	2319.36	2532.94
ENSMUSG00000019774	Mtrf1l	0.297217	8.12e-06	1.84e-05	378.707	382.353	448.35	486.82
ENSMUSG00000019777	Hdac2	-0.0583171	0.0260875	0.0396356	2428.25	2291.94	2097.25	2435.95
ENSMUSG00000019782	Rwdd1	-0.109656	0.0100423	0.0164071	1028.94	884.191	890.92	882.188
ENSMUSG00000019790	Stxbp5	0.205051	7.57e-07	1.83e-06	1052.76	1028.66	1094.04	1305.27
ENSMUSG00000019791	Hint3	0.081665	0.303838	0.352558	82.1724	103.192	113.945	82.2144
ENSMUSG00000019792	Trmt11	0.160581	0.00950911	0.0156088	408.48	429.061	440.093	496.057
ENSMUSG00000019794	Katna1	0.427283	1.24e-13	3.95e-13	576.397	425.802	685.323	662.334
ENSMUSG00000019795	Pcmt1	0.303729	4.34e-17	1.54e-16	1414.79	1307.82	1571.29	1789.32
ENSMUSG00000019796	Lrp11	2.31926	1.27e-11	3.83e-11	3.57271	7.60361	28.0735	27.7127
ENSMUSG00000019797	1700021F05Rik	-0.422181	1.12e-07	2.83e-07	366.798	322.61	272.478	242.024
ENSMUSG00000019802	Sec63	0.279395	1.63e-31	7.33e-31	3289.28	3029.49	3609.09	4059.91
ENSMUSG00000019804	Snx3	0.189759	7.17e-07	1.74e-06	1335	1147.06	1309.54	1521.43
ENSMUSG00000019806	Aig1	0.181459	0.228383	0.277337	27.3908	46.7079	31.3762	52.6541
ENSMUSG00000019808	Adat2	0.227414	0.00510386	0.00871817	215.554	258.523	304.68	250.338
ENSMUSG00000019809	Pex3	-0.0726942	0.196297	0.24344	297.726	283.506	270.001	282.67
ENSMUSG00000019810	Fuca2	0.0848037	0.0944964	0.127657	447.78	519.218	457.432	568.11
ENSMUSG00000019813	Cep57l1	-0.277392	3.4e-05	7.34e-05	528.761	386.698	352.57	402.758
ENSMUSG00000019814	Ltv1	0.170643	1.51e-06	3.58e-06	1463.62	1414.27	1488.72	1750.52
ENSMUSG00000019815	Zc2hc1b	9.85293	0	0	0	0	0	1.84751
ENSMUSG00000019818	Cd164	0.254539	8.64e-25	3.56e-24	3080.87	2888.28	3557.07	3563.85
ENSMUSG00000019820	Utrn	0.0280516	0.0449688	0.0654067	7000.13	8050.05	6990.29	8355.38
ENSMUSG00000019822	Smpd2	-0.116678	0.134658	0.174131	169.108	245.488	194.863	187.523
ENSMUSG00000019823	Mical1	0.122513	0.000185833	0.000375172	1714.9	1619.57	1620.83	2009.17
ENSMUSG00000019826	Zbtb24	-0.0761064	0.10867	0.144155	558.534	569.184	473.946	595.823
ENSMUSG00000019831	Wasf1	8.69295	1	1	0	0	0.82569	0
ENSMUSG00000019834	Slc22a16	-10.1543	0	0	1.1909	1.08623	0	0
ENSMUSG00000019837	Gtf3c6	-0.0416822	0.122875	0.160358	1726.81	1530.5	1456.52	1708.03
ENSMUSG00000019838	Slc16a10	-9.08777	0	0	0	1.08623	0	0
ENSMUSG00000019841	Rev3l	0.522221	2.12e-80	1.27e-79	2179.35	2113.8	2912.21	3253.47
ENSMUSG00000019842	Traf3ip2	0.238286	1.4e-06	3.33e-06	753.842	688.669	762.112	939.461
ENSMUSG00000019843	Fyn	0.243545	4.53e-13	1.43e-12	1542.22	1653.24	1669.55	2113.56
ENSMUSG00000019845	Tube1	-0.131463	0.066196	0.0929941	277.481	292.196	256.79	263.271
ENSMUSG00000019849	Prep	0.280228	2.53e-22	1e-21	2272.24	2071.44	2548.91	2726.01
ENSMUSG00000019850	Tnfaip3	5.65495	0	0	84.5542	60.8288	3422.49	3902.87
ENSMUSG00000019851	Perp	-9.08777	0	0	0	1.08623	0	0
ENSMUSG00000019854	Reps1	0.384634	2.21e-27	9.45e-27	1360.01	1376.25	1686.89	1885.39
ENSMUSG00000019856	Fam184a	1.02491	0.295925	0.34454	0	2.17246	1.65138	2.77127
ENSMUSG00000019857	Asf1a	0.452983	3.36e-20	1.28e-19	768.133	607.202	933.03	949.622
ENSMUSG00000019861	Gopc	-0.164788	3.27e-07	8.08e-07	2026.92	1937.83	1674.5	1862.29
ENSMUSG00000019863	Qrsl1	0.0211161	0.360695	0.405012	604.979	578.96	555.69	645.706
ENSMUSG00000019864	Rtn4ip1	-5.98e-05	0.50132	0.524528	693.106	736.464	657.249	772.261
ENSMUSG00000019865	Nmbr	8.85449	1	1	0	0	0	0.923757
ENSMUSG00000019866	Crybg1	0.223201	2.13e-06	5e-06	713.351	896.139	903.305	975.487
ENSMUSG00000019867	Gje1	11.592	0	0	0	0	2.47707	3.69503
ENSMUSG00000019868	Vta1	0.0790115	0.0782454	0.108263	716.924	622.409	657.249	757.481
ENSMUSG00000019873	Reep3	0.123479	2.4e-05	5.25e-05	2201.98	2068.18	2188.08	2463.66
ENSMUSG00000019876	Pkib	0.0616244	0.401631	0.440497	67.8815	35.8456	68.5323	39.7215
ENSMUSG00000019877	Serinc1	0.697647	1.32e-88	8.14e-88	1146.84	1296.96	1846.24	2117.25
ENSMUSG00000019878	Hsf2	0.147168	0.0165145	0.0260466	385.853	443.182	436.79	481.277
ENSMUSG00000019883	Echdc1	-0.270064	0.0094707	0.0155485	147.672	200.952	124.679	164.429
ENSMUSG00000019891	Dcbld1	0.1525	0.0128846	0.0206841	423.962	433.406	454.13	498.829
ENSMUSG00000019897	Ccdc59	0.412531	5.61e-25	2.32e-24	1176.61	942.847	1369.82	1451.22
ENSMUSG00000019899	Lama2	10.8522	0	0	0	0	0	3.69503
ENSMUSG00000019907	Ppp1r12a	0.215468	7.25e-20	2.75e-19	3392.88	3259.77	3618.17	4106.1
ENSMUSG00000019916	P4ha1	-0.174453	1.4e-10	4.05e-10	2359.18	3333.64	2000.65	3043.78
ENSMUSG00000019917	2022-09-10	-0.11288	0.077604	0.107437	370.371	321.524	290.643	349.18
ENSMUSG00000019920	Lims1	0.156337	1.2e-06	2.86e-06	1513.64	2023.65	1808.26	2133.88
ENSMUSG00000019923	Zwint	0.717962	5.65e-194	4.03e-193	2685.49	2389.7	4091.3	4256.67
ENSMUSG00000019927	Ube2d1	-0.18085	0.00731331	0.0122361	439.443	351.938	312.937	385.207
ENSMUSG00000019933	Mrln	-0.907805	0.236221	0.285058	2.38181	1.08623	0	1.84751
ENSMUSG00000019935	Slc17a8	0.338065	0.321704	0.369901	3.57271	13.0348	9.90828	11.0851
ENSMUSG00000019942	Cdk1	0.253846	7.83e-20	2.97e-19	2523.53	2169.2	2727.26	2868.27
ENSMUSG00000019943	Atp2b1	0.193561	1.13e-11	3.4e-11	2213.89	2331.05	2399.46	2798.06
ENSMUSG00000019944	Rhobtb1	-0.746689	2.04e-16	7.13e-16	248.899	334.559	144.496	203.227
ENSMUSG00000019945	Cabcoco1	-11.4621	0	0	2.38181	3.25869	0	0
ENSMUSG00000019947	Arid5b	0.144208	0.000543488	0.00104476	955.105	1068.85	907.434	1329.29
ENSMUSG00000019948	Actr6	-0.046911	0.362349	0.406561	142.908	157.503	133.762	157.039
ENSMUSG00000019951	Uhrf1bp1l	-0.0629369	0.0638114	0.0901307	1213.53	1255.68	1004.04	1359.77
ENSMUSG00000019952	Poc1b	-0.222794	0.000242341	0.000483327	544.243	535.511	454.13	471.116
ENSMUSG00000019960	Dusp6	-1.49447	0	0	3409.56	3057.74	904.131	1391.18
ENSMUSG00000019961	Tmpo	0.219446	2.09e-48	1.09e-47	8576.89	8006.6	8963.69	10344.2
ENSMUSG00000019969	Psen1	0.228904	3.77e-11	1.12e-10	1500.54	1533.76	1551.47	2004.55
ENSMUSG00000019970	Sgk1	1.46873	4.36e-12	1.33e-11	27.3908	18.4659	66.8809	60.0442
ENSMUSG00000019971	Cep290	0.0821847	0.0796318	0.109779	582.352	611.547	589.543	674.343
ENSMUSG00000019975	Ikbip	-0.0358892	0.430256	0.464381	46.4452	63.0013	57.7983	48.9591
ENSMUSG00000019977	Hbs1l	0.344379	1.11e-25	4.63e-25	1539.84	1705.38	1942.85	2177.29
ENSMUSG00000019978	Epb41l2	0.0506462	0.0149922	0.0237898	3735.87	3787.68	3604.96	4187.39
ENSMUSG00000019979	Apaf1	0.311931	2.34e-22	9.26e-22	1751.82	1704.29	2089	2201.31
ENSMUSG00000019982	Myb	-0.501538	2.99e-100	1.89e-99	4126.48	4224.35	2749.55	3149.09
ENSMUSG00000019984	Med23	0.420908	5.87e-26	2.47e-25	1038.47	1079.71	1339.27	1496.49
ENSMUSG00000019986	Ahi1	-0.0200198	0.371816	0.413066	554.961	683.238	506.148	714.988
ENSMUSG00000019987	Arg1	1.79901	4.7e-10	1.33e-09	14.2908	6.51738	28.0735	44.3403
ENSMUSG00000019988	Nedd1	-0.197089	0.000889295	0.00167099	558.534	553.977	462.387	508.066
ENSMUSG00000019990	Pde7b	9.6912	0	0	0	0	1.65138	0
ENSMUSG00000019992	Mtfr2	0.364536	7.67e-09	2.06e-08	385.853	463.82	480.552	613.375
ENSMUSG00000019996	Map7	-0.143068	0.00230524	0.00412238	963.441	738.636	749.727	791.66
ENSMUSG00000019998	Stx7	-0.0837464	0.0792174	0.109254	621.652	631.099	500.368	681.733
ENSMUSG00000020003	Pex7	0.445051	3.6e-13	1.14e-12	479.934	399.732	564.772	632.773
ENSMUSG00000020009	Ifngr1	0.148743	0.0014673	0.00268808	820.533	739.722	781.929	947.775
ENSMUSG00000020014	Cfap54	-0.429465	0.0218154	0.0336844	61.927	51.0528	24.7707	59.1204
ENSMUSG00000020015	Cdk17	0.407488	9.22e-25	3.79e-24	1119.45	1042.78	1402.85	1465.08
ENSMUSG00000020017	Hal	0.488511	0.347673	0.392795	5.95452	0	7.43121	0.923757
ENSMUSG00000020018	Snrpf	1.31601	4.83e-12	1.47e-11	29.7726	29.3282	67.7066	79.4431
ENSMUSG00000020020	Usp44	1.28111	5.42e-100	3.43e-99	332.262	284.592	716.699	782.422
ENSMUSG00000020021	Fgd6	-0.258229	5.6e-15	1.87e-14	2011.44	1948.7	1513.49	1797.63
ENSMUSG00000020022	Ndufa12	-0.0416738	0.172989	0.217945	1250.45	907.002	1096.52	999.505
ENSMUSG00000020023	Tmcc3	11.4973	0	0	0	0	5.77983	0
ENSMUSG00000020024	Cep83	0.313755	1.19e-16	4.16e-16	1227.82	1239.39	1394.59	1672
ENSMUSG00000020027	Socs2	0.0327773	0.03616	0.0534584	6539.25	5780.91	5883.87	6719.41
ENSMUSG00000020029	Nudt4	-0.108464	0.00165964	0.00302033	1682.75	1465.32	1329.36	1590.71
ENSMUSG00000020034	Tcp11l2	0.735796	1.89e-15	6.41e-15	188.163	147.727	236.973	322.391
ENSMUSG00000020037	Rfx4	11.3849	0	0	0	0	1.65138	3.69503
ENSMUSG00000020038	Cry1	0.525143	2.41e-18	8.8e-18	459.689	426.888	582.112	693.741
ENSMUSG00000020048	Hsp90b1	-0.226584	6.29e-114	4.11e-113	23142.8	20695.9	17955.5	19511.6
ENSMUSG00000020053	Igf1	0.489891	0.0602084	0.0854239	26.1999	7.60361	28.0735	19.3989
ENSMUSG00000020056	Washc3	0.141987	0.0775434	0.107361	211.981	192.263	218.808	227.244
ENSMUSG00000020057	Dram1	-11.6705	0	0	0	6.51738	0	0
ENSMUSG00000020059	Sycp3	-0.147204	0.585052	0.603124	2.38181	4.34492	3.30276	2.77127
ENSMUSG00000020061	Mybpc1	2.29713	0.0178687	0.0279695	0	1.08623	1.65138	3.69503
ENSMUSG00000020062	Slc5a8	9.85293	0	0	0	0	0	1.84751
ENSMUSG00000020063	Sirt1	0.442676	1.49e-26	6.33e-26	913.423	1025.4	1247.62	1387.48
ENSMUSG00000020064	Herc4	-0.0735799	0.0227294	0.034922	1558.89	1566.34	1345.88	1623.96
ENSMUSG00000020069	Hnrnph3	-0.0657694	0.0172785	0.027167	2313.93	2061.66	2071.66	2108.94
ENSMUSG00000020070	Rufy2	-0.16765	0.000471783	0.000912389	824.105	861.38	626.699	873.874
ENSMUSG00000020072	Pbld2	1.04704	0.000151652	0.000308985	17.8636	13.0348	37.9818	25.8652
ENSMUSG00000020074	Ccar1	0.0313999	0.0397504	0.0583722	6448.74	6459.81	6226.53	6966.05
ENSMUSG00000020075	Ddx21	0.307185	1.76e-177	1.24e-176	15281.7	15509.2	18179.2	19918
ENSMUSG00000020076	Ddx50	0.291694	2.56e-21	9.96e-21	1948.32	1830.3	2309.46	2315.86
ENSMUSG00000020077	Srgn	0.686926	1.78e-121	1.17e-120	1761.35	1736.88	2555.51	3076.11
ENSMUSG00000020078	Vps26a	-0.00160432	0.497779	0.521755	884.841	896.139	880.186	898.815
ENSMUSG00000020079	Supv3l1	0.771782	5.31e-55	2.86e-54	622.843	558.322	932.204	1084.49
ENSMUSG00000020080	Hkdc1	10.6903	0	0	0	0	3.30276	0
ENSMUSG00000020086	H2afy2	-0.444939	0.521954	0.543048	4.76361	0	1.65138	1.84751
ENSMUSG00000020087	Tysnd1	-0.100672	0.0288345	0.0434764	801.478	740.808	730.736	707.598
ENSMUSG00000020088	Sar1a	0.627334	1.17e-105	7.51e-105	1916.16	1831.38	2833.77	2955.1
ENSMUSG00000020089	Ppa1	-0.0181224	0.358583	0.402922	915.805	749.498	838.076	806.44
ENSMUSG00000020091	Eif4ebp2	-0.0336295	0.0590537	0.0838968	4705.26	4404.66	4102.03	4797.99
ENSMUSG00000020096	Tbata	-9.22026	0	0	1.1909	0	0	0
ENSMUSG00000020097	Sgpl1	0.123064	0.0096039	0.0157457	734.788	689.756	758.809	792.583
ENSMUSG00000020098	Pcbd1	1.79182	0.120406	0.157499	1.1909	0	4.12845	0
ENSMUSG00000020100	Slc29a3	0.0970656	0.164486	0.208296	241.753	194.435	194.037	272.508
ENSMUSG00000020101	Vsir	-0.385145	0.00426781	0.00735071	123.854	98.8469	80.9176	89.6044
ENSMUSG00000020102	Slc16a7	-10.0864	0	0	0	2.17246	0	0
ENSMUSG00000020107	Anapc16	0.403064	3.31e-16	1.15e-15	734.788	648.479	847.158	981.954
ENSMUSG00000020108	Ddit4	2.81083	0	0	1903.06	1866.14	13386.1	13061.9
ENSMUSG00000020109	Dnajb12	0.624767	1.23e-67	7.06e-67	1265.93	1124.25	1775.23	1910.33
ENSMUSG00000020111	Micu1	0.124391	0.0164867	0.0260071	650.233	505.097	588.717	670.648
ENSMUSG00000020114	Cand1	0.401989	1.73e-61	9.63e-61	2977.26	2839.4	3569.46	4116.26
ENSMUSG00000020115	Tbk1	0.294536	2.39e-18	8.74e-18	1585.09	1555.48	1875.97	1975.92
ENSMUSG00000020116	Pno1	0.134773	0.0051219	0.00874721	772.897	639.789	746.424	804.592
ENSMUSG00000020120	Plek	0.273924	0.244897	0.293833	1.1909	19.5521	6.60552	18.4751
ENSMUSG00000020121	Srgap1	-10.0864	0	0	0	2.17246	0	0
ENSMUSG00000020122	Egfr	-0.301339	0.602975	0.619545	1.1909	1.08623	0	1.84751
ENSMUSG00000020124	Usp15	0.14665	3.89e-09	1.06e-08	3124.93	2926.3	3153.31	3545.38
ENSMUSG00000020128	Vps54	0.204905	6.67e-10	1.88e-09	1716.09	1608.71	1823.95	2008.25
ENSMUSG00000020130	Tbc1d15	0.253199	4.91e-14	1.6e-13	1673.22	1528.32	1690.19	2125.56
ENSMUSG00000020131	Pcsk4	-0.0271993	0.409149	0.447342	182.208	143.382	109.817	209.693
ENSMUSG00000020132	Rab21	0.349639	2.31e-28	1e-27	1787.55	1701.04	2145.14	2300.15
ENSMUSG00000020133	2310011J03Rik	-0.139266	0.0102688	0.0167417	612.125	589.823	533.396	557.949
ENSMUSG00000020134	Peli1	0.449636	2.25e-34	1.05e-33	1265.93	1205.71	1539.09	1836.43
ENSMUSG00000020135	Apc2	0.943719	5.73e-23	2.29e-22	178.636	110.795	259.267	297.45
ENSMUSG00000020137	Thap2	-0.338711	1.36e-05	3.03e-05	354.889	338.904	241.927	306.687
ENSMUSG00000020140	Lgr5	-0.449759	7.61e-06	1.72e-05	163.154	273.73	137.89	181.98
ENSMUSG00000020142	Slc1a4	0.550105	7.37e-32	3.33e-31	665.715	790.775	952.021	1180.56
ENSMUSG00000020143	Dock2	0.0598012	1.4e-05	3.12e-05	9767.79	10128	10099.8	10638
ENSMUSG00000020149	Rab1a	0.301866	2.98e-35	1.4e-34	3009.41	3025.15	3468.72	3970.31
ENSMUSG00000020150	Gamt	0.559917	0.0270205	0.0409464	30.9635	6.51738	24.7707	30.484
ENSMUSG00000020152	Actr2	0.057357	1e-05	2.25e-05	10656.2	11805.1	10831.4	12540.9
ENSMUSG00000020153	Ndufs7	0.0229448	0.339214	0.384608	870.551	630.013	743.121	781.498
ENSMUSG00000020154	Ptprb	8.69295	1	1	0	0	0.82569	0
ENSMUSG00000020156	Pwwp3a	-0.396564	6.64e-26	2.78e-25	1619.63	1550.05	1161.75	1246.15
ENSMUSG00000020163	Uqcr11	-0.280342	2.53e-07	6.28e-07	855.069	568.098	610.185	561.644
ENSMUSG00000020166	Cnot2	0.00157108	0.479094	0.505978	2717.64	2448.36	2562.94	2608.69
ENSMUSG00000020167	Tcf3	-0.0245575	0.121845	0.159164	5173.29	4258.02	4515.7	4756.42
ENSMUSG00000020170	Frs2	0.55197	4.08e-36	1.93e-35	846.733	799.465	1130.37	1283.1
ENSMUSG00000020171	Yeats4	0.263343	1.28e-09	3.58e-09	1069.43	825.534	1103.12	1171.32
ENSMUSG00000020175	Rab36	0.101753	0.368809	0.411224	36.918	13.0348	23.1193	30.484
ENSMUSG00000020176	Grb10	-0.196291	5.28e-10	1.5e-09	1811.36	2389.7	1382.21	2284.45
ENSMUSG00000020178	Adora2a	-0.00629333	0.66042	0.677411	3.57271	3.25869	4.95414	1.84751
ENSMUSG00000020180	Snrpd3	-0.0329357	0.111006	0.14695	3149.94	2597.17	2581.93	3035.47
ENSMUSG00000020182	Ddc	-0.452621	5.29e-15	1.77e-14	676.433	671.29	458.258	526.541
ENSMUSG00000020183	Cpm	-0.345798	0.000194451	0.000391668	211.981	274.816	165.964	217.083
ENSMUSG00000020184	Mdm2	1.55974	0	0	1936.41	1762.95	5297.63	5608.13
ENSMUSG00000020185	E2f7	0.860603	4.59e-163	3.17e-162	1517.21	1246.99	2492.76	2526.48
ENSMUSG00000020186	Csrp2	0.498444	1.86e-06	4.39e-06	167.917	116.227	182.478	218.93
ENSMUSG00000020189	Osbpl8	0.663672	1.16e-101	7.39e-101	1557.7	1602.19	2498.54	2507.08
ENSMUSG00000020190	Mknk2	0.196934	3.19e-20	1.22e-19	4501.62	3681.23	4419.09	4960.57
ENSMUSG00000020191	Spata48	1.85368	5.98e-10	1.69e-09	5.95452	13.0348	13.211	55.4254
ENSMUSG00000020193	Zpbp	0.261994	0.148011	0.189621	40.4907	28.242	37.1561	45.2641
ENSMUSG00000020196	Cabin1	0.353289	6.52e-60	3.6e-59	3818.04	3687.75	4637.08	4951.34
ENSMUSG00000020198	Ap3d1	0.113493	8.79e-05	0.000182983	2335.36	2001.92	2111.29	2580.98
ENSMUSG00000020205	Phlda1	3.142	0	0	225.081	296.541	1923.86	2680.74
ENSMUSG00000020211	Sf3a2	0.288732	2.72e-13	8.61e-13	1284.99	985.21	1329.36	1443.83
ENSMUSG00000020212	Mdm1	-0.0446559	0.260021	0.308862	453.734	439.923	451.653	414.767
ENSMUSG00000020213	Glipr1l1	-9.22026	0	0	1.1909	0	0	0
ENSMUSG00000020214	Glipr1l2	8.85449	1	1	0	0	0	0.923757
ENSMUSG00000020216	Jsrp1	1.39358	0.00163995	0.00298675	1.1909	9.77606	14.0367	14.7801
ENSMUSG00000020219	Timm13	-0.0516851	0.142336	0.18299	992.023	825.534	907.434	846.161
ENSMUSG00000020220	Vps13d	0.0262505	0.0602424	0.0854658	7157.33	7352.69	6937.45	7839
ENSMUSG00000020224	Llph	0.198499	1.86e-17	6.66e-17	3592.96	3255.43	3918.73	3939.82
ENSMUSG00000020225	Tmbim4	-0.0130302	0.441625	0.474444	350.126	380.18	338.533	385.207
ENSMUSG00000020226	Slc5a4b	11.0121	0	0	0	0	4.12845	0
ENSMUSG00000020227	Irak3	0.264964	8.37e-05	0.000174618	344.171	397.56	397.983	493.286
ENSMUSG00000020228	Helb	-0.0893936	0.00584253	0.00990699	1631.54	1768.38	1326.88	1868.76
ENSMUSG00000020230	Prmt2	2.42932	4.45e-09	1.21e-08	0	7.60361	20.6423	20.3227
ENSMUSG00000020231	Dip2a	-0.185923	0.14507	0.186169	64.3088	74.9498	50.3671	72.053
ENSMUSG00000020232	Hmg20b	0.160417	0.0158106	0.0250164	339.408	348.68	377.34	391.673
ENSMUSG00000020234	4930404N11Rik	1.08813	3.14e-05	6.79e-05	14.2908	20.6384	28.0735	46.1878
ENSMUSG00000020235	Fzr1	0.278407	8.67e-17	3.05e-16	1700.61	1506.6	1898.26	1991.62
ENSMUSG00000020238	Ncln	-0.168026	9.55e-05	0.000197984	1168.28	986.296	941.287	976.411
ENSMUSG00000020241	Col6a2	-11.2184	0	0	4.76361	0	0	0
ENSMUSG00000020246	Hcfc2	0.14892	0.00445342	0.00765533	501.37	691.928	635.782	687.275
ENSMUSG00000020248	Nfyb	0.327801	4.65e-17	1.65e-16	993.214	1316.51	1367.34	1531.59
ENSMUSG00000020250	Txnrd1	1.21128	0	0	3546.51	3075.12	7976.99	7354.95
ENSMUSG00000020251	Glt8d2	2.71208	1.33e-41	6.54e-41	20.2454	6.51738	86.6975	88.6807
ENSMUSG00000020253	Ppm1m	-0.184816	0.00918458	0.0151174	347.744	363.887	289.817	336.248
[truncated: 17,258 more rows]
