# Supplementary material for: Transcriptional inhibition after irradiation occurs preferentially at highly expressed genes in a manner dependent on cell cycle progression
Source: bioRxiv preprint, doi:10.1101/2023.11.20.567799, version 2 (2024-06-11)
Supplement: Supplementary file 4 [file 567799_file06.xlsx]

## Sheet: CRISPR_CompareHighToUnsorted
Table 1: Whole genome CRISPR/Cas9 screen detects the abundance of all gRNAs and target genes for EU-high cells and unsorted cells
Detailed ID	Guide_sequence	Gene names	P value	P adjusted	Log2FC	normalized reads in Eu-high	normalized reads in unsorted
0610007P14Rik_CCDS26063.1_ex1_12:85816364-85816386:+_5-1	AAATACAAACAACTCTGAG	0610007P14Rik	0.269567	0.434107	-0.599463	1.8007	2.72834
0610007P14Rik_CCDS26063.1_ex1_12:85816385-85816407:+_5-2	GAAGTGTCCCAGGGCGAGG	0610007P14Rik	0.223155	0.41298	-0.542148	4.05267	5.90125
0610007P14Rik_CCDS26063.1_ex1_12:85816413-85816435:-_5-3	ACTCTATCACATCACACTG	0610007P14Rik	0.0641358	0.230851	-0.940881	4.2028	8.06812
0610007P14Rik_CCDS26063.1_ex2_12:85819535-85819557:-_5-4	AGCCCGGACCTTTGGGATC	0610007P14Rik	0.00279294	0.0400138	0.760498	32.6777	19.2894
0610007P14Rik_CCDS26063.1_ex3_12:85822102-85822124:-_5-5	TCTACGAGAAGCTCTACAC	0610007P14Rik	0.0349242	0.165923	0.974758	8.60666	4.37928
0610009B22Rik_CCDS36149.1_ex0_11:51685793-51685815:-_5-1	CTGCATGACGTGAGGCACG	0610009B22Rik	0.387825	0.503931	0.136381	16.0131	14.5687
0610009B22Rik_CCDS36149.1_ex0_11:51685824-51685846:-_5-2	CGTCACGGCTGGGCACATG	0610009B22Rik	1.73e-06	0.00029518	-1.69976	7.10534	23.0814
0610009B22Rik_CCDS36149.1_ex0_11:51685838-51685860:-_5-3	TTCGTCTCGGCGTTCGTCA	0610009B22Rik	0.161666	0.354918	-0.329203	18.2901	22.9782
0610009B22Rik_CCDS36149.1_ex0_11:51685907-51685929:+_5-4	CCACATGTTTTCGTCGACG	0610009B22Rik	0.0266583	0.142448	0.716749	18.9407	11.5248
0610009B22Rik_CCDS36149.1_ex0_11:51685931-51685953:-_5-5	TTCATAGCTCATGCTGCTC	0610009B22Rik	0.525324	0.563993	-0.00917013	14.9122	15.0073
0610009D07Rik_CCDS25791.1_ex1_12:4820669-4820691:+_5-1	ATGATATATTTGGGAAATA	0610009D07Rik	0.632121	0.63387	0	1	1
0610009D07Rik_CCDS25791.1_ex1_12:4820693-4820715:-_5-2	ACACTCTGATTTGACGAAT	0610009D07Rik	0.19516	0.387955	0.886044	2.80158	1.51592
0610009D07Rik_CCDS25791.1_ex2_12:4826759-4826781:+_5-3	GGAATACACCTGAAACCAG	0610009D07Rik	0.632121	0.63387	0	1	1
0610009D07Rik_CCDS25791.1_ex2_12:4826782-4826804:+_5-4	ACAGCCTATGTGGTCTATG	0610009D07Rik	0.264241	0.430654	-1.00435	1	2.00605
0610009D07Rik_CCDS25791.1_ex2_12:4826826-4826848:-_5-5	AATCCTGATAGGTGGTCGC	0610009D07Rik	0.67858	0.679062	0.0364028	2.40123	2.3414
0610009O20Rik_CCDS50260.1_ex1_18:38251165-38251187:-_5-1	CCTAGTGAGCGGCAGGGTA	0610009O20Rik	0.0209779	0.124185	-0.693791	13.536	21.8948
0610009O20Rik_CCDS50260.1_ex2_18:38251291-38251313:+_5-2	CCACGGTTCAAAGAGGAGC	0610009O20Rik	0.176001	0.369531	0.383782	16.0131	12.2729
0610009O20Rik_CCDS50260.1_ex3_18:38252859-38252881:+_5-3	ATCCACTTCCACGCCCCTC	0610009O20Rik	0.432123	0.523277	-0.0969051	17.9398	19.1862
0610009O20Rik_CCDS50260.1_ex5_18:38254299-38254321:-_5-4	GAAGTCTCGGCTAGCATGC	0610009O20Rik	0.260566	0.430654	0.136933	56.0982	51.0186
0610009O20Rik_CCDS50260.1_ex5_18:38254339-38254361:+_5-5	CCGAGGCCCACCCCCCTGG	0610009O20Rik	0.270914	0.435504	0.226006	22.1685	18.9541
0610010F05Rik_CCDS36119.1_ex14_11:23615151-23615173:+_5-1	ATCAGCTATGCGTGTAAGA	0610010F05Rik	0.400632	0.510269	0.0929799	17.7396	16.6324
0610010F05Rik_CCDS36119.1_ex16_11:23620259-23620281:-_5-2	TATGTTAAACGGAACACTA	0610010F05Rik	0.275234	0.437872	-0.689517	2.65145	4.2761
0610010F05Rik_CCDS36119.1_ex17_11:23622504-23622526:-_5-3	ACATAGTATAGCTACCACA	0610010F05Rik	0.282435	0.442747	0.284289	8.63168	7.08787
0610010F05Rik_CCDS36119.1_ex18_11:23625043-23625065:-_5-4	ATAACCCTTTAATGGCTAC	0610010F05Rik	0.0803014	0.250219	-1.62736	1	3.08948
0610010F05Rik_CCDS36119.1_ex19_11:23628871-23628893:+_5-5	CCTCTTTGGGCGTTAATCC	0610010F05Rik	0.268727	0.433949	-0.402286	7.88102	10.4156
0610010K14Rik_CCDS24940.1_ex2_11:70236026-70236048:+_9-1	CCTTCTGTTTCTTTATGGG	0610010K14Rik	0.317482	0.465475	-0.163311	17.6396	19.7537
0610010K14Rik_CCDS24940.1_ex2_11:70236053-70236075:-_9-2	GCTCCAGTGTCCCTGAAGC	0610010K14Rik	0.134051	0.323363	-0.556836	9.13212	13.4337
0610010K14Rik_CCDS24940.1_ex2_11:70236110-70236132:-_9-3	GACCCAAGAAGATGACGTC	0610010K14Rik	0.201474	0.393628	0.491009	11.4842	8.17131
0610010K14Rik_CCDS24940.1_ex2_11:70236135-70236157:+_9-4	CTTGGGTGACTCAGCTGGA	0610010K14Rik	0.401727	0.510756	-0.142572	17.6145	19.4442
0610010K14Rik_CCDS24940.1_ex2_11:70236175-70236197:+_9-5	TACACTTTTCGCTTCACAG	0610010K14Rik	0.462385	0.535545	-0.156256	6.42975	7.16526
0610010K14Rik_CCDS24940.1_ex3_11:70237516-70237538:+_9-8	CTGGTCTCACGTACCCGGC	0610010K14Rik	0.0100928	0.0842517	-0.792053	12.5851	21.7916
0610010K14Rik_CCDS24940.1_ex3_11:70237531-70237553:-_9-9	TCTCGGACTCTTCCCCTGC	0610010K14Rik	0.0464567	0.193927	0.524183	25.9969	18.077
0610010K14Rik_CCDS48833.1_ex2_11:70236942-70236964:-_9-6	GACGGAGATAGAGATGCTG	0610010K14Rik	0.511409	0.556299	-0.00192043	9.75766	9.77066
0610010K14Rik_CCDS48833.1_ex2_11:70236969-70236991:-_9-7	CCCTTCCGACAGTGCCAAG	0610010K14Rik	0.0639862	0.230542	-0.493981	18.7155	26.3575
0610011F06Rik_CCDS28536.1_ex0_17:25875634-25875656:+_5-1	TCGGGCTCTGGACAGCACG	0610011F06Rik	0.290646	0.448145	0.216736	14.712	12.6598
0610011F06Rik_CCDS28536.1_ex0_17:25875672-25875694:-_5-2	TGCCACTCGGCATTCGGGA	0610011F06Rik	0.104831	0.285539	-0.405288	17.2142	22.7977
0610011F06Rik_CCDS28536.1_ex0_17:25875695-25875717:-_5-3	AGCGTTGGTCCACGTCCGA	0610011F06Rik	0.403612	0.511445	0.0961216	15.7379	14.7235
0610011F06Rik_CCDS28536.1_ex1_17:25876007-25876029:+_5-4	GCTGTACCTGGACGTGACC	0610011F06Rik	1.6e-06	0.000277974	1.5031	29.4499	10.3898
0610011F06Rik_CCDS28536.1_ex1_17:25876053-25876075:-_5-5	CAGGTCCAGCGATCGGGGT	0610011F06Rik	0.295488	0.451444	0.14226	27.5232	24.9387
0610012H03Rik_CCDS38191.1_ex1_2:105297818-105297840:+_5-1	GCGAGCCGAAGATCCCCAC	0610012H03Rik	0.00317143	0.04339	-1.11921	7.20543	15.6522
0610012H03Rik_CCDS38191.1_ex1_2:105297873-105297895:-_5-2	ATTGTCCTGCCACCGGGTC	0610012H03Rik	0.406947	0.512675	-0.0703615	25.4714	26.7445
0610012H03Rik_CCDS38191.1_ex1_2:105297906-105297928:-_5-3	GTACACAGCGTTGTTCACG	0610012H03Rik	0.0137259	0.100682	0.816327	18.8406	10.6993
0610012H03Rik_CCDS38191.1_ex2_2:105378652-105378674:+_5-4	TGCTGACATCCCCCCAGGT	0610012H03Rik	0.134289	0.323663	-0.453052	9.98286	13.6659
0610012H03Rik_CCDS38191.1_ex2_2:105378690-105378712:-_5-5	GGGTGTATGGAACTTGCAC	0610012H03Rik	0.18852	0.381851	-0.692383	3.82747	6.18501
0610030E20Rik_CCDS51808.1_ex0_6:72347495-72347517:-_5-1	CCGATCGAGCTGGTTCCGA	0610030E20Rik	0.0249813	0.137175	-0.704283	13.7862	22.4623
0610030E20Rik_CCDS51808.1_ex1_6:72347590-72347612:+_5-2	AGGGACGACTACGACAAGA	0610030E20Rik	0.193877	0.386613	0.584351	7.03028	4.68884
0610030E20Rik_CCDS51808.1_ex2_6:72348538-72348560:-_5-3	CAGTCTGGGTTCACGGGGT	0610030E20Rik	0.305656	0.457946	-0.203338	12.8103	14.7493
0610030E20Rik_CCDS51808.1_ex2_6:72348591-72348613:+_5-4	GCTCCGAGCTAGAGCCTCC	0610030E20Rik	0.406838	0.512665	0.234526	7.15539	6.08182
0610030E20Rik_CCDS51808.1_ex2_6:72348623-72348645:+_5-5	TTCTGTTTAGACTATGAGG	0610030E20Rik	0.257007	0.430654	0.429442	10.4833	7.78436
0610031J06Rik_CCDS17469.1_ex1_3:88325681-88325703:+_5-1	TATGGAGGTTATTTCCGGC	0610031J06Rik	0.346729	0.482374	0.165278	18.0149	16.0649
0610031J06Rik_CCDS17469.1_ex1_3:88325718-88325740:+_5-2	CTGCTTCATATTCGGGCAG	0610031J06Rik	0.0308478	0.154436	0.647581	20.8424	13.3047
0610031J06Rik_CCDS17469.1_ex2_3:88326126-88326148:+_5-3	GACAGCACCAATGCGTCCG	0610031J06Rik	0.0194931	0.119084	-1.01925	5.27874	10.6993
0610031J06Rik_CCDS17469.1_ex2_3:88326175-88326197:-_5-4	ACTTGGCCAAGGAGTACGG	0610031J06Rik	0.433286	0.523921	-0.0859213	9.15714	9.71907
0610031J06Rik_CCDS17469.1_ex3_3:88326418-88326440:-_5-5	GGTCGACCAGATCTAGAAA	0610031J06Rik	0.447063	0.529286	0.188381	3.90254	3.42483
0610037L13Rik_CCDS18442.1_ex0_4:107890108-107890130:-_5-1	AGTGCGATTTTCTGAGAAG	0610037L13Rik	0.00365985	0.0457028	-2.24502	1	4.74043
0610037L13Rik_CCDS18442.1_ex0_4:107890141-107890163:-_5-2	TTCGTGACGTTCTCCAGCG	0610037L13Rik	0.199237	0.391368	0.308085	16.6637	13.4595
0610037L13Rik_CCDS18442.1_ex0_4:107890163-107890185:-_5-3	GTCCTCGCCCACTGGCCGA	0610037L13Rik	0.0743178	0.249138	-0.543506	13.1106	19.1088
0610037L13Rik_CCDS18442.1_ex0_4:107890181-107890203:+_5-4	GACTTCCGGTGGTACCTGA	0610037L13Rik	0.0824991	0.253374	-0.651264	8.35644	13.1241
0610037L13Rik_CCDS18442.1_ex1_4:107891500-107891522:+_5-5	TGGCAATACATCCGGCTGA	0610037L13Rik	0.413292	0.515415	0.109394	14.9372	13.8464
0610040J01Rik_CCDS39092.1_ex1_5:63898115-63898137:+_5-1	AGAGCAGAGGCAGTACAAC	0610040J01Rik	0.43086	0.522494	-0.0933933	12.0597	12.8662
0610040J01Rik_CCDS39092.1_ex1_5:63898264-63898286:-_5-2	CCAGGAGCTATTGTCAACC	0610040J01Rik	0.0758436	0.250219	-0.756276	6.65495	11.241
0610040J01Rik_CCDS39092.1_ex1_5:63898294-63898316:-_5-3	GTCTATGGTGGCTACCCAG	0610040J01Rik	0.203669	0.395606	-0.254581	19.8665	23.7005
0610040J01Rik_CCDS39092.1_ex1_5:63898540-63898562:+_5-5	TTTGAAAACCACTCTGAGG	0610040J01Rik	0.0886648	0.262901	0.62845	11.8345	7.65538
1100001G20Rik_CCDS36258.1_ex0_11:83747108-83747130:-_2-1	ACGTACCTAAAAGCTGCAG	1100001G20Rik	0.434951	0.524535	-0.146963	4.32791	4.79202
1100001G20Rik_CCDS36258.1_ex1_11:83749243-83749265:+_2-2	GAGCTCTGCCGTGGTGACT	1100001G20Rik	0.455192	0.532674	-0.0323366	16.2133	16.5808
1110001A16Rik_CCDS50183.1_ex0_17:78918451-78918473:+_4-1	AAAAGATGCACTCCAGCCA	1110001A16Rik	0.091948	0.26743	-0.567994	10.158	15.0589
1110001A16Rik_CCDS50183.1_ex0_17:78918464-78918486:-_4-2	GAGCTGAGTTTACCTTGGC	1110001A16Rik	0.0265765	0.142105	0.614405	27.3981	17.8964
1110001A16Rik_CCDS50183.1_ex1_17:78919079-78919101:+_4-3	AATTTCCATTCATTTTGGA	1110001A16Rik	0.46384	0.535746	-0.26169	3.50219	4.19871
1110001A16Rik_CCDS50183.1_ex2_17:78919753-78919775:-_4-4	ATGGATTTGTAATAAACTG	1110001A16Rik	0.0803014	0.250219	-1.34923	1	2.54776
1110001J03Rik_CCDS20014.1_ex0_6:38534950-38534972:+_5-1	CGGCCATATCGCGACACAG	1110001J03Rik	0.360443	0.490355	0.242081	12.41	10.493
1110001J03Rik_CCDS20014.1_ex0_6:38534973-38534995:-_5-2	GCCTTAACGAGGTACCGGT	1110001J03Rik	0.128417	0.316563	-0.517995	9.05705	12.9694
1110001J03Rik_CCDS20014.1_ex0_6:38534994-38535016:+_5-3	TTTCCGAGCACATCGGGTA	1110001J03Rik	0.122485	0.309212	0.930282	4.95346	2.59936
1110001J03Rik_CCDS20014.1_ex1_6:38539224-38539246:-_5-4	TTGCCGGATGCTACTCAAA	1110001J03Rik	0.277974	0.439741	-0.221617	11.6093	13.5369
1110001J03Rik_CCDS20014.1_ex1_6:38539242-38539264:+_5-5	CAACATGTAGCCCTTCATC	1110001J03Rik	0.47545	0.540037	0.168782	8.4315	7.50061
1110004E09Rik_CCDS28321.1_ex3_16:90927437-90927459:+_5-1	GCACCTCGAAGCTGGTCCA	1110004E09Rik	0.176689	0.370244	-0.737402	2.95171	4.921
1110004E09Rik_CCDS28321.1_ex5_16:90931010-90931032:-_5-2	TTTTACGAAGGACGAGATC	1110004E09Rik	0.632121	0.63387	0	1	1
1110004E09Rik_CCDS28321.1_ex5_16:90931072-90931094:-_5-3	ATCGAAGAGCTGAAACTGA	1110004E09Rik	0.397618	0.508751	-0.611029	2.27612	3.47642
1110004E09Rik_CCDS28321.1_ex6_16:90934576-90934598:-_5-4	CACCGGCTCTGCTCAGGTG	1110004E09Rik	0.264241	0.430654	-0.784328	1	1.72229
1110004E09Rik_CCDS28321.1_ex6_16:90934611-90934633:-_5-5	AGGTGGCCCGCGTCTACAA	1110004E09Rik	0.632121	0.63387	-0.389074	1	1.30955
1110004F10Rik_CCDS21766.1_ex1_7:116099497-116099519:+_5-1	TCTTGAGACTCATGGGTGC	1110004F10Rik	0.399829	0.509622	0.0918463	22.8942	21.4821
1110004F10Rik_CCDS21766.1_ex2_7:116101983-116102005:+_5-2	CAACATCTCACTTCCGAAC	1110004F10Rik	0.00761345	0.0709965	-1.23398	5.2287	12.2987
1110004F10Rik_CCDS21766.1_ex3_7:116103221-116103243:+_5-3	AAGAAAATTAATGAAGAGC	1110004F10Rik	0.354553	0.486908	0.484896	5.47892	3.91496
1110004F10Rik_CCDS21766.1_ex3_7:116103271-116103293:+_5-4	CAAACTGTCAGGACGGTAC	1110004F10Rik	0.535954	0.570973	0.0716979	10.4583	9.95123
1110004F10Rik_CCDS21766.1_ex4_7:116104206-116104228:+_5-5	TTTAGGTAGAAGATCATGA	1110004F10Rik	0.0189882	0.117173	-2.06995	1	4.19871
1110007C09Rik_CCDS49260.1_ex3_13:49205188-49205210:+_5-1	TACGAGGAGAGTAGCGGCT	1110007C09Rik	0.158104	0.3512	-0.419032	12.0347	16.0907
1110007C09Rik_CCDS49260.1_ex3_13:49205261-49205283:-_5-2	CGTGGGGAACGGCACTGTC	1110007C09Rik	0.0938746	0.270263	0.479716	16.5386	11.8601
1110007C09Rik_CCDS49260.1_ex3_13:49205279-49205301:+_5-3	ACGCTGCTGTAGATGGCTC	1110007C09Rik	0.0848216	0.257344	0.521362	16.7638	11.6796
1110007C09Rik_CCDS49260.1_ex3_13:49205303-49205325:+_5-4	GTCACAGAGCCGTACGCGC	1110007C09Rik	0.0132757	0.0986792	-0.684374	17.5895	28.2664
1110007C09Rik_CCDS49260.1_ex3_13:49205328-49205350:+_5-5	GCCTTGGGGTTCCGGAACT	1110007C09Rik	0.00460622	0.0524432	0.78156	27.7484	16.1423
1110008F13Rik_CCDS16970.1_ex0_2:156863396-156863418:+_5-1	GACGCGGCCTGGGACGACA	1110008F13Rik	0.00397397	0.048142	1.04167	17.9899	8.73882
1110008F13Rik_CCDS16970.1_ex1_2:156865283-156865305:+_5-2	TTCCGACAGATCATCGCTC	1110008F13Rik	0.000510541	0.0140703	1.31279	19.4662	7.83596
1110008F13Rik_CCDS16970.1_ex1_2:156865320-156865342:+_5-3	GGGGCGTTTTGCCCTTGCG	1110008F13Rik	0.427906	0.521662	0.0766913	17.8397	16.9162
1110008F13Rik_CCDS16970.1_ex1_2:156865332-156865354:-_5-4	TTCCCAAGAAGCCTCGCAA	1110008F13Rik	0.00887692	0.0779255	-1.15065	6.00438	13.3305
1110008F13Rik_CCDS16970.1_ex2_2:156872344-156872366:-_5-5	CAGAACTCCTGCATTGATC	1110008F13Rik	0.00188537	0.0313984	0.9624	25.2212	12.9436
1110008J03Rik_CCDS51635.1_ex0_5:120609886-120609908:-_5-1	GAGGGGTCTCGGATGGCCG	1110008J03Rik	0.248785	0.430654	-0.265478	18.6655	22.4365
1110008J03Rik_CCDS51635.1_ex0_5:120609904-120609926:-_5-2	CTGTTTGGCACTAGCAAGG	1110008J03Rik	0.00497272	0.0549258	-0.78513	16.2383	27.9827
1110008J03Rik_CCDS51635.1_ex0_5:120609924-120609946:+_5-3	GTGACTCATCGCAGTAGGA	1110008J03Rik	0.393741	0.506794	-0.126342	8.85688	9.66748
1110008J03Rik_CCDS51635.1_ex1_5:120611456-120611478:+_5-4	GAGAGCCCTTCGGTGGTCC	1110008J03Rik	0.411065	0.514287	-0.0936335	17.7146	18.9025
1110008J03Rik_CCDS51635.1_ex1_5:120611480-120611502:-_5-5	GTAACCGATCCAGAGGAGT	1110008J03Rik	0.027956	0.146234	1.17942	6.52984	2.88311
1110008L16Rik_CCDS49068.1_ex0_12:55304014-55304036:-_5-1	CATCTTTGTTGGTTCCCGA	1110008L16Rik	0.23382	0.421328	0.499583	7.03028	4.97259
1110008L16Rik_CCDS49068.1_ex0_12:55304172-55304194:+_5-2	CTAAGAAGAGGTCCCACAT	1110008L16Rik	0.125302	0.312709	0.62653	8.83185	5.72068
1110008L16Rik_CCDS49068.1_ex0_12:55304396-55304418:+_5-3	GCAAAGAACAATGGCATCG	1110008L16Rik	0.290092	0.447803	0.677325	3.00175	1.87707
1110008L16Rik_CCDS49068.1_ex0_12:55304532-55304554:+_5-4	GTTATACCCTTCTCATCCG	1110008L16Rik	0.104833	0.285539	-1.3276	1.77568	4.45667
1110008L16Rik_CCDS49068.1_ex0_12:55304726-55304748:-_5-5	TTTTAGAGTTTCCAACGGA	1110008L16Rik	0.0803014	0.250219	1.48624	2.80158	1
1110008P14Rik_CCDS38103.1_ex0_2:32379423-32379445:+_5-1	GTTCGACTCCAGCAGCTCC	1110008P14Rik	0.11667	0.301671	-0.706586	6.42975	10.493
1110008P14Rik_CCDS38103.1_ex0_2:32379462-32379484:+_5-2	GTCATTCTTCTCCTCCAGG	1110008P14Rik	0.557648	0.586693	0.000533999	18.2901	18.2834
1110008P14Rik_CCDS38103.1_ex0_2:32379477-32379499:-_5-3	AACTCTTGTCTGGACCACC	1110008P14Rik	0.311576	0.46124	-0.267146	11.9346	14.3624
1110008P14Rik_CCDS38103.1_ex0_2:32379493-32379515:+_5-4	GAGTTGATCTGATCCAACA	1110008P14Rik	0.284151	0.443948	-0.206598	16.3134	18.8251
1110008P14Rik_CCDS38103.1_ex0_2:32379515-32379537:+_5-5	AGTTGATGGCAGCATACTC	1110008P14Rik	0.0299472	0.151884	-1.29694	2.92669	7.19105
1110012L19Rik_CCDS30174.1_ex0_X:70388075-70388097:+_5-1	GAAGTGCTCATGGAGAGGT	1110012L19Rik	0.0807846	0.250819	0.665996	13.2107	8.32608
1110012L19Rik_CCDS30174.1_ex0_X:70388111-70388133:+_5-2	CAGATTCAGACCTTACTAC	1110012L19Rik	0.24142	0.427795	0.242677	21.9683	18.5671
1110012L19Rik_CCDS30174.1_ex0_X:70388133-70388155:+_5-3	CAGGAGAAAAGTACGGCAG	1110012L19Rik	0.106862	0.288247	0.629634	8.53159	5.51431
1110012L19Rik_CCDS30174.1_ex1_X:70388868-70388890:-_5-4	CTCCAATGTCAATAAGTCC	1110012L19Rik	0.0331679	0.160796	0.855775	13.0606	7.21685
1110012L19Rik_CCDS30174.1_ex1_X:70388906-70388928:+_5-5	GAGACCTTAACTGCTGAGG	1110012L19Rik	0.264241	0.430654	1.03627	2.05092	1
1110017D15Rik_CCDS38717.1_ex2_4:41507557-41507579:-_5-1	TCAGTTCGAGGAATGCCGT	1110017D15Rik	0.0150417	0.106173	-0.781186	13.0856	22.4881
1110017D15Rik_CCDS38717.1_ex4_4:41511476-41511498:-_5-2	CCTATAAGAGTTCCATATC	1110017D15Rik	0.065457	0.233519	-1.0171	3.50219	7.08787
1110017D15Rik_CCDS38717.1_ex4_4:41511504-41511526:-_5-3	ATGACCAAATGTGCCGCAC	1110017D15Rik	0.000305842	0.0100313	-1.20547	9.38234	21.6368
1110017D15Rik_CCDS38717.1_ex4_4:41511537-41511559:-_5-4	CACCGCCACGTGGACCCTG	1110017D15Rik	0.384566	0.502607	-0.102866	28.0987	30.1753
1110017D15Rik_CCDS38717.1_ex5_4:41517051-41517073:-_5-5	GACCCACCACTATGGGCCT	1110017D15Rik	0.198465	0.390934	0.357923	13.8112	10.7767
1110032A03Rik_CCDS23173.1_ex1_9:50764246-50764268:-_5-1	ATATGATGCAAACTACAGC	1110032A03Rik	0.210871	0.402064	-0.758933	3.15188	5.33374
1110032A03Rik_CCDS23173.1_ex2_9:50764688-50764710:+_5-2	ATATTACCTGGGAAGGCAA	1110032A03Rik	0.150638	0.342566	-0.564383	5.97936	8.842
1110032A03Rik_CCDS23173.1_ex2_9:50764747-50764769:+_5-3	TGGTTCCAGTTTCCTACCA	1110032A03Rik	0.026273	0.141133	0.895473	14.3367	7.70698
1110032A03Rik_CCDS23173.1_ex2_9:50764764-50764786:-_5-4	TCCTATTCGAACCGTACCC	1110032A03Rik	2.54e-05	0.00191105	-1.93984	3.60228	13.8206
1110032A03Rik_CCDS23173.1_ex2_9:50764807-50764829:+_5-5	CATCCGTACTGTAAAAACT	1110032A03Rik	0.0803014	0.250219	-1.40651	1	2.65095
1110032F04Rik_CCDS50931.1_ex0_3:68869863-68869885:+_5-1	TGCGACTCGGCCAACGCCA	1110032F04Rik	0.0300039	0.152008	0.5344	31.0013	21.4047
1110032F04Rik_CCDS50931.1_ex0_3:68869912-68869934:+_5-2	ACGCCTTTCTGGACAACGT	1110032F04Rik	0.0239748	0.133806	-0.861999	6.88015	12.505
1110032F04Rik_CCDS50931.1_ex0_3:68870016-68870038:-_5-3	CGGGTACCTGCGTGGGCTG	1110032F04Rik	0.533773	0.569356	-0.00355807	11.9596	11.9891
1110032F04Rik_CCDS50931.1_ex0_3:68870135-68870157:-_5-4	ACCTCGTCGCGCAGCAGAG	1110032F04Rik	0.114301	0.298506	-0.437063	13.0856	17.7158
1110032F04Rik_CCDS50931.1_ex0_3:68870173-68870195:+_5-5	ACTCACTGTTGGATAGTGG	1110032F04Rik	0.459561	0.534328	-0.0812819	9.35731	9.89964
1110034G24Rik_CCDS50727.1_ex0_2:132692030-132692052:-_5-1	TGGGATGCTTCATAACTGC	1110034G24Rik	0.341586	0.479972	0.288122	8.05617	6.59775
1110034G24Rik_CCDS50727.1_ex0_2:132692110-132692132:+_5-2	CTTCTTCGACTACTGATCC	1110034G24Rik	0.125602	0.313104	-0.439001	10.7085	14.5171
1110034G24Rik_CCDS50727.1_ex1_2:132750266-132750288:+_5-3	GGCTTGATCCTTCTTCGAA	1110034G24Rik	0.16023	0.353415	0.584578	10.3582	6.9073
1110034G24Rik_CCDS50727.1_ex1_2:132750330-132750352:-_5-4	GCTTCATAGAATCTATCCA	1110034G24Rik	0.195549	0.388167	0.729154	5.07857	3.06368
1110034G24Rik_CCDS50727.1_ex1_2:132750416-132750438:+_5-5	AGACAATCTCTGAGCTCGA	1110034G24Rik	0.20623	0.397869	0.45692	10.0829	7.34583
1110037F02Rik_CCDS38693.1_ex1_4:11494814-11494836:+_5-1	GAAGTCCGAGTTATACCCC	1110037F02Rik	0.386338	0.503408	-0.387394	4.07769	5.33374
1110037F02Rik_CCDS38693.1_ex10_4:11521176-11521198:-_5-5	TCTAACATCTGGACACCGC	1110037F02Rik	0.449291	0.530269	0.129861	9.08207	8.30029
1110037F02Rik_CCDS38693.1_ex7_4:11513146-11513168:-_5-2	CGGGTCATACGTCATAGGA	1110037F02Rik	0.102493	0.282554	-0.701489	7.0553	11.4732
1110037F02Rik_CCDS38693.1_ex7_4:11514134-11514156:-_5-3	GGTACGGGTCATCCCGCTC	1110037F02Rik	0.138644	0.328846	0.623665	7.78093	5.04998
1110037F02Rik_CCDS38693.1_ex9_4:11518998-11519020:+_5-4	GGTGTACTGCAAGCCACGA	1110037F02Rik	0.600469	0.624205	-0.0248292	4.17778	4.2503
1110051M20Rik_CCDS16431.1_ex5_2:91304748-91304770:-_5-1	GCTTACTCAGAAAGCCGCC	1110051M20Rik	0.266859	0.432631	0.330737	14.4618	11.499
1110051M20Rik_CCDS16431.1_ex5_2:91304771-91304793:-_5-2	TTGTGCCCAGACTTCCCGC	1110051M20Rik	0.0834696	0.255373	-0.487935	12.4851	17.5095
1110051M20Rik_CCDS16431.1_ex6_2:91383745-91383767:+_5-3	GTTCGGAAGCATCTCCAGA	1110051M20Rik	0.145557	0.336714	-0.573794	6.75504	10.0544
1110051M20Rik_CCDS16431.1_ex6_2:91383839-91383861:-_5-4	GTTTTAACAGCGTATGCCA	1110051M20Rik	0.0106817	0.087073	1.17902	10.9087	4.81782
1110051M20Rik_CCDS16431.1_ex7_2:91421890-91421912:-_5-5	GGGAGGATATTAGCCAGTA	1110051M20Rik	0.0104611	0.0859219	-1.49422	2.35118	6.62354
1110057K04Rik_CCDS25798.1_ex0_12:8220700-8220722:-_5-1	GACGTCTTGTTTCTCAAAG	1110057K04Rik	0.291761	0.44897	-0.531415	2.72651	3.94075
1110057K04Rik_CCDS25798.1_ex1_12:8227225-8227247:-_5-2	CGTAGAATGCGGAATAGCC	1110057K04Rik	0.169766	0.363369	0.382302	17.039	13.0726
1110057K04Rik_CCDS25798.1_ex1_12:8227249-8227271:-_5-3	TGTACAAGGCCTTTGCAAA	1110057K04Rik	0.0803014	0.250219	-1.57836	1	2.9863
1110057K04Rik_CCDS25798.1_ex1_12:8227284-8227306:-_5-4	GATTATCCATACCGGGAAG	1110057K04Rik	0.000643521	0.015683	1.46437	15.2875	5.54011
1110057K04Rik_CCDS25798.1_ex2_12:8238558-8238580:-_5-5	CATATAGGTGCCTACGGAA	1110057K04Rik	0.0199109	0.120598	-0.829906	9.63255	17.1225
1110058L19Rik_CCDS14852.1_ex0_1:23996344-23996366:+_5-1	ACATCATCCGGAAACTCTG	1110058L19Rik	0.441218	0.527013	0.143961	8.03115	7.26844
1110058L19Rik_CCDS14852.1_ex1_1:24003144-24003166:+_5-2	ACCACTACTCACTCTGCAG	1110058L19Rik	0.0697619	0.241219	0.507715	23.2445	16.3487
1110058L19Rik_CCDS14852.1_ex1_1:24003190-24003212:-_5-3	CTCGGTCGTTTTGACTCAC	1110058L19Rik	0.562559	0.590483	-0.0241893	13.2357	13.4595
1110058L19Rik_CCDS14852.1_ex1_1:24003212-24003234:+_5-4	GGCAGCTTTGACTTCTTAA	1110058L19Rik	0.122658	0.309501	0.72766	8.10622	4.89521
1110058L19Rik_CCDS14852.1_ex1_1:24003231-24003253:+_5-5	GGGCTTGCTTCGCAGGCTC	1110058L19Rik	0.309181	0.460039	0.202963	13.7111	11.9117
1110059E24Rik_CCDS29699.1_ex1_19:21598779-21598801:-_5-1	TTGAAGTTTGTGCCAAATG	1110059E24Rik	0.0815901	0.251981	-0.961844	2.97673	5.79807
1110059E24Rik_CCDS29699.1_ex1_19:21598840-21598862:-_5-2	TGTTTACAAAAGACAGTAA	1110059E24Rik	0.328374	0.472228	-0.594061	1.17515	1.77388
1110059E24Rik_CCDS29699.1_ex2_19:21619109-21619131:+_5-3	ACTTCTTAGGCTTTGACAG	1110059E24Rik	0.0397697	0.17836	-0.896106	5.92931	11.0347
1110059E24Rik_CCDS29699.1_ex2_19:21619156-21619178:-_5-4	CTGCAAAGAAGTTCTTGAG	1110059E24Rik	0.55184	0.5821	-0.0629679	9.05705	9.46111
1110059E24Rik_CCDS29699.1_ex2_19:21619190-21619212:-_5-5	TTAATGCAAAACTTCATGA	1110059E24Rik	0.0189882	0.117173	-1.8398	1	3.57961
1110059G10Rik_CCDS23650.1_ex1_9:122948964-122948986:-_5-1	GGAGACCTAACAGCTGAAG	1110059G10Rik	0.0208235	0.123515	1.06497	11.1589	5.33374
1110059G10Rik_CCDS23650.1_ex1_9:122948997-122949019:-_5-3	GATGAACAGCCTCAAGTAG	1110059G10Rik	0.321704	0.467897	-0.21358	7.38058	8.55825
1110059G10Rik_CCDS23650.1_ex2_9:122950804-122950826:-_5-4	GGGCCCACCGTAGAGACCA	1110059G10Rik	0.418713	0.517362	0.122886	11.9596	10.9831
1110059G10Rik_CCDS23650.1_ex2_9:122950824-122950846:-_5-5	AGAGAGTCGGCTACAAGGA	1110059G10Rik	0.2631	0.430654	0.198591	20.5671	17.9222
1110059M19Rik_CCDS53063.1_ex1_X:45092030-45092052:-_5-1	TAGCAGGTGTTAGTGTAAG	1110059M19Rik	0.354553	0.486908	0.339441	4.95346	3.91496
1110059M19Rik_CCDS53063.1_ex1_X:45092045-45092067:-_5-2	GGGACTCTTCCTCAATAGC	1110059M19Rik	0.185758	0.379178	-0.561798	6.30464	9.30633
1110059M19Rik_CCDS53063.1_ex1_X:45092074-45092096:+_5-3	GCAGAAATAAACAGCTCAG	1110059M19Rik	0.0920714	0.267538	0.622414	10.6334	6.9073
1110059M19Rik_CCDS53063.1_ex1_X:45092146-45092168:+_5-4	GAATTCTCTGGAAGCCCTA	1110059M19Rik	0.386123	0.503387	0.198328	6.8301	5.95284
1110059M19Rik_CCDS53063.1_ex1_X:45092161-45092183:-_5-5	TCCGATCATCAGTGCCATA	1110059M19Rik	0.122282	0.308889	-0.510918	10.6585	15.1878
1110065P20Rik_CCDS51298.1_ex0_4:124849894-124849916:+_2-1	TCCTTTGGAAGGCCACCTC	1110065P20Rik	0.491116	0.546081	0.0319753	10.8336	10.5961
1110065P20Rik_CCDS51298.1_ex0_4:124849910-124849932:-_2-2	AGCCATCTGTATCGGCCAG	1110065P20Rik	0.642156	0.643411	0.0736461	2.30114	2.18662
1190002N15Rik_CCDS40725.1_ex2_9:94537314-94537336:-_5-1	CGCCGCTACGCGGAGACCA	1190002N15Rik	0.113859	0.297944	-0.439725	13.9363	18.9025
1190002N15Rik_CCDS40725.1_ex2_9:94537414-94537436:-_5-2	GCGTCTCAACGGCGACGTG	1190002N15Rik	0.0759588	0.250219	0.4995	18.5904	13.1499
1190002N15Rik_CCDS40725.1_ex2_9:94537542-94537564:+_5-3	GCGCTTGAGCACCACGCGC	1190002N15Rik	0.411212	0.5144	-0.0646707	18.6905	19.5474
1190002N15Rik_CCDS40725.1_ex2_9:94537586-94537608:-_5-4	ACGTGTACTTCGCGCAGTA	1190002N15Rik	0.261713	0.430654	0.289	13.9864	11.4474
1190002N15Rik_CCDS40725.1_ex2_9:94537688-94537710:+_5-5	AGCTCGTGCCGAAGCACGC	1190002N15Rik	0.135321	0.325381	-0.465485	11.7094	16.1681
1190003K10Rik_CCDS56887.1_ex0_13:64481829-64481851:-_5-1	GAAGAATGGAAGGAGAGGC	1190003K10Rik	0.264241	0.430654	-0.762556	1	1.69649
1190003K10Rik_CCDS56887.1_ex0_13:64481841-64481863:+_5-2	CCATTCTTCTCTAAGCCTG	1190003K10Rik	0.0214899	0.12591	0.740559	21.3678	12.7888
1190003K10Rik_CCDS56887.1_ex1_13:64485859-64485881:+_5-3	TCTCAGAGCGCTTCTCCCC	1190003K10Rik	0.0284851	0.147692	0.524035	34.2291	23.8037
1190003K10Rik_CCDS56887.1_ex1_13:64485875-64485897:-_5-4	ACTGGAAGAAGATCGCCAG	1190003K10Rik	0.00350558	0.0457028	1.16597	14.8621	6.62354
1190003K10Rik_CCDS56887.1_ex1_13:64485892-64485914:-_5-5	CAGACTTGTTACCGAGAAC	1190003K10Rik	0.47263	0.539119	-0.139225	9.4574	10.4156
1190005I06Rik_CCDS52690.1_ex1_8:120611220-120611242:+_5-1	CCATGCCCGTCGGGGTTGG	1190005I06Rik	0.396436	0.508146	-0.0948448	16.5886	17.7158
1190005I06Rik_CCDS52690.1_ex1_8:120611281-120611303:+_5-2	CAGGACGGGGGCCTCGTCG	1190005I06Rik	0.101667	0.281514	0.940882	6.07944	3.16687
1190005I06Rik_CCDS52690.1_ex1_8:120611293-120611315:-_5-3	AGCAACAACAACCACGACG	1190005I06Rik	0.164072	0.357434	0.540258	8.8819	6.10762
1190005I06Rik_CCDS52690.1_ex2_8:120628466-120628488:-_5-4	CCCTCCTGTCTGAAAGGTA	1190005I06Rik	0.273548	0.436853	0.215012	15.5627	13.4079
1190005I06Rik_CCDS52690.1_ex2_8:120628494-120628516:-_5-5	CCGCAGAGGCGACGCCATG	1190005I06Rik	0.0616965	0.226205	-0.464062	20.3419	28.0601
1190007I07Rik_CCDS48653.1_ex0_10:82620171-82620193:+_5-1	GCTCCGTTTTGAGTTCTCC	1190007I07Rik	0.0365858	0.17031	-0.818262	6.57988	11.6022
1190007I07Rik_CCDS48653.1_ex0_10:82620189-82620211:-_5-2	CTGAAATTCCACCAAAGCC	1190007I07Rik	0.50598	0.553228	0.0518768	9.03203	8.71302
1190007I07Rik_CCDS48653.1_ex1_10:82622694-82622716:+_5-3	CTACAGCACTCACCAGGTC	1190007I07Rik	0.0105403	0.0863336	-0.917623	8.23133	15.549
1190007I07Rik_CCDS48653.1_ex1_10:82622707-82622729:-_5-4	TGGTACTATCGGCCTGACC	1190007I07Rik	0.000350303	0.0109902	-1.79962	3.57726	12.4535
1190007I07Rik_CCDS48653.1_ex1_10:82622719-82622741:+_5-5	ATAGTACCAATGCACCACC	1190007I07Rik	0.000170577	0.00668723	-2.59086	1.12511	6.77832
1200011I18Rik_CCDS27283.1_ex3_14:76099139-76099161:-_5-1	TTGGACCAATGCCTGCAAA	1200011I18Rik	0.499239	0.549688	-0.0167532	13.6611	13.8206
1200011I18Rik_CCDS27283.1_ex4_14:76102507-76102529:+_5-2	GAGACTTAATGAAACCAGG	1200011I18Rik	0.0346743	0.165162	-1.42448	1.77568	4.76623
1200011I18Rik_CCDS27283.1_ex5_14:76106039-76106061:+_5-3	TTCTAATTTATCACCTGGG	1200011I18Rik	0.263529	0.430654	0.355915	11.1839	8.73882
1200011I18Rik_CCDS27283.1_ex5_14:76106070-76106092:-_5-4	CCTCCTGGGTTTAAGAAGC	1200011I18Rik	0.0938398	0.270228	0.663798	10.9837	6.93309
1200011I18Rik_CCDS27283.1_ex6_14:76107423-76107445:+_5-5	TGTAATTAGGGGGCAGAGC	1200011I18Rik	0.0503849	0.202811	0.749913	11.6593	6.93309
1200014J11Rik_CCDS24994.1_ex0_11:73048031-73048053:+_5-1	GGCGAGCTGGAAATCGTGC	1200014J11Rik	0.119952	0.305862	0.686163	10.4082	6.46877
1200014J11Rik_CCDS24994.1_ex0_11:73048050-73048072:-_5-2	CCTTTAGGGAGCGCCGCAC	1200014J11Rik	0.013893	0.101405	0.949893	15.0373	7.78436
1200014J11Rik_CCDS24994.1_ex1_11:73049903-73049925:+_5-3	GGGATCGATGTCACCTCCA	1200014J11Rik	0.0409801	0.180822	0.946882	10.0829	5.23055
1200014J11Rik_CCDS24994.1_ex2_11:73053451-73053473:-_5-4	GCTCGAAAGTGGAAGCGCT	1200014J11Rik	0.450207	0.530415	-0.127408	5.37883	5.87546
1200014J11Rik_CCDS24994.1_ex8_11:73070815-73070837:-_5-5	ACATCCCGCTGAATGCGAC	1200014J11Rik	0.0351563	0.166574	-0.883748	7.2805	13.4337
1300002K09Rik_CCDS18141.1_ex3_4:45864887-45864909:+_5-1	GGGGACTTTTAGTAACCGA	1300002K09Rik	0.000102711	0.00486745	-2.04023	2.65145	10.9057
1300002K09Rik_CCDS18141.1_ex3_4:45864976-45864998:-_5-2	CCCACTGAGGAACCGTCAG	1300002K09Rik	0.414487	0.51595	-0.134138	6.12949	6.72673
1300002K09Rik_CCDS18141.1_ex8_4:45870807-45870829:-_5-3	GGGTCCCACTCATACACCC	1300002K09Rik	0.0284859	0.147692	-0.917954	7.0553	13.3305
1300002K09Rik_CCDS18141.1_ex9_4:45873643-45873665:-_5-4	ACTCAATGACGATGAACTG	1300002K09Rik	0.372807	0.496621	0.469528	4.27787	3.08948
1300002K09Rik_CCDS18141.1_ex9_4:45873726-45873748:-_5-5	CGTCTCGTTCATATGGGTG	1300002K09Rik	0.191731	0.384895	-0.293473	17.8648	21.8948
1300017J02Rik_CCDS23452.1_ex10_9:103272570-103272592:-_5-3	GAATATGAACAGTGCTACC	1300017J02Rik	0.0726697	0.246299	-0.848044	5.82923	10.493
1300017J02Rik_CCDS23452.1_ex12_9:103277473-103277495:+_5-4	CCAAAGTATGGTTCCCGGG	1300017J02Rik	0.0179905	0.117173	0.757291	19.9166	11.7828
1300017J02Rik_CCDS23452.1_ex15_9:103282496-103282518:+_5-5	AGATGTCCCGGATGCACTC	1300017J02Rik	9.19e-06	0.0010018	-1.76112	5.20368	17.6385
1300017J02Rik_CCDS23452.1_ex9_9:103269610-103269632:+_5-1	CCTCTTTTAAGATTCCGAA	1300017J02Rik	0.000133556	0.00570212	1.70375	13.7612	4.22451
1300017J02Rik_CCDS23452.1_ex9_9:103269723-103269745:-_5-2	TTTGGCTCCCCTCACGGGG	1300017J02Rik	0.159734	0.3531	0.343726	23.1694	18.2576
1500009L16Rik_CCDS48656.1_ex2_10:83757456-83757478:+_4-2	GATAACGGAAGACGACAAG	1500009L16Rik	0.0803014	0.250219	1.3931	2.62642	1
1500009L16Rik_CCDS48656.1_ex3_10:83758135-83758157:+_4-4	ACTATGGAGGAGTGTATGT	1500009L16Rik	0.00135104	0.0254339	-2.24377	1.17515	5.5659
1500012F01Rik_CCDS38338.1_ex2_2:167065719-167065741:-_2-1	CCTTGTGGGGCTGGGCAGC	1500012F01Rik	0.118571	0.304261	0.434521	21.2928	15.7553
1500012F01Rik_CCDS38338.1_ex2_2:167065732-167065754:-_2-2	GCATTCTGCATAGCCTTGT	1500012F01Rik	0.266899	0.43266	0.199503	30.3257	26.4091
1500015O10Rik_CCDS14925.1_ex2_1:43738562-43738584:-_5-1	CATTAGTCTTTGACGGGAC	1500015O10Rik	0.399646	0.509524	0.175108	15.4877	13.7175
1500015O10Rik_CCDS14925.1_ex2_1:43738629-43738651:+_5-2	GCGTGCCAAACGACAGCTG	1500015O10Rik	0.00197483	0.0323868	0.972715	22.719	11.5764
1500015O10Rik_CCDS14925.1_ex2_1:43738641-43738663:+_5-3	ACAGCTGTGGGACCGTACG	1500015O10Rik	0.229123	0.417662	-0.374627	8.4315	10.9315
1500015O10Rik_CCDS14925.1_ex2_1:43738654-43738676:-_5-4	CTGTACCTCAGGCCGCGTA	1500015O10Rik	0.155729	0.348793	0.276805	30.7761	25.4031
1500015O10Rik_CCDS14925.1_ex2_1:43738681-43738703:+_5-5	TACCAGCAGTTCCTCTACA	1500015O10Rik	0.0256481	0.139344	0.910347	14.4368	7.68118
1600002H07Rik_CCDS28479.1_ex6_17:24219795-24219817:-_5-1	GGGTATGGACCAGACCTCA	1600002H07Rik	0.291863	0.44897	0.259428	9.65758	8.06812
1600002H07Rik_CCDS28479.1_ex6_17:24219858-24219880:+_5-2	TGATCGTAGTCTGTGCTCA	1600002H07Rik	0.192261	0.385147	-0.658711	3.8525	6.08182
1600002H07Rik_CCDS28479.1_ex6_17:24219898-24219920:+_5-3	GTGGCCCGCTGTATACCCT	1600002H07Rik	0.0293135	0.150216	0.708296	19.0408	11.6538
1600002H07Rik_CCDS28479.1_ex7_17:24220239-24220261:+_5-4	GCTAACGTTTACCTGGACT	1600002H07Rik	0.337791	0.477838	0.271193	7.93107	6.57195
1600002H07Rik_CCDS28479.1_ex8_17:24220527-24220549:+_5-5	CAGCCTCCTGGAAACGCGC	1600002H07Rik	0.192836	0.385784	-0.423745	8.95696	12.0149
1600002K03Rik_CCDS24012.1_ex0_10:80173051-80173073:+_5-1	TTATAACCACACAAACGGG	1600002K03Rik	0.363046	0.491451	0.303928	9.48242	7.68118
1600002K03Rik_CCDS24012.1_ex0_10:80173064-80173086:+_5-2	AACGGGAGGCTCCCGGACA	1600002K03Rik	0.439847	0.526123	-0.0817487	10.183	10.7767
1600002K03Rik_CCDS24012.1_ex0_10:80173107-80173129:+_5-3	GCTTGTTCTACGTAATCAC	1600002K03Rik	0.00516036	0.056241	1.40405	9.88277	3.73438
1600002K03Rik_CCDS24012.1_ex0_10:80173145-80173167:+_5-4	TCGCTTTACTTCCTCATCC	1600002K03Rik	0.0810807	0.251158	0.459111	24.0702	17.5095
1600002K03Rik_CCDS24012.1_ex0_10:80173163-80173185:-_5-5	GCTAACGCACCTAAAAGCC	1600002K03Rik	0.602135	0.625806	0.0168535	3.15188	3.11528
1600012H06Rik_CCDS37444.1_ex0_17:14943712-14943734:+_5-1	TCCTTCTGCACGTGGTCCA	1600012H06Rik	0.0851637	0.257398	-0.482737	13.3608	18.6703
1600012H06Rik_CCDS37444.1_ex0_17:14943759-14943781:+_5-2	TACTTGCGGTTGAACCATG	1600012H06Rik	0.0114875	0.0907319	0.959545	14.7871	7.60379
1600012H06Rik_CCDS37444.1_ex0_17:14943825-14943847:-_5-3	AGTGCTGTCCGACACGTAC	1600012H06Rik	0.373208	0.497056	-0.0536735	80.7448	83.8054
1600012H06Rik_CCDS37444.1_ex0_17:14943847-14943869:-_5-4	AGTCGTCGAAGCTCGGGTG	1600012H06Rik	0.19664	0.389072	0.447091	13.4609	9.87385
1600012H06Rik_CCDS37444.1_ex0_17:14943924-14943946:-_5-5	TCCTATCCCGACCGGTCGC	1600012H06Rik	0.244689	0.430166	0.341503	9.73264	7.68118
1600014C23Rik_CCDS57097.1_ex1_17:45733594-45733616:+_5-1	AGGCAGGGTTCCTTGCTGG	1600014C23Rik	0.000857517	0.0189817	-1.23986	7.55574	17.8448
1600014C23Rik_CCDS57097.1_ex1_17:45733635-45733657:+_5-2	CCTTTCCGGGACTCCCAGT	1600014C23Rik	0.199744	0.391977	0.30168	18.8156	15.2652
1600014C23Rik_CCDS57097.1_ex1_17:45733649-45733671:+_5-3	CCAGTGGGTAGACTGGGGA	1600014C23Rik	0.27207	0.436097	-0.221358	22.719	26.4865
1600014C23Rik_CCDS57097.1_ex1_17:45733670-45733692:+_5-4	GGGGCACTGGCCGAAAGAC	1600014C23Rik	0.00391312	0.0477072	1.09161	17.1391	8.04232
1600014C23Rik_CCDS57097.1_ex1_17:45733705-45733727:-_5-5	GTTCGACCCATCTACAGAG	1600014C23Rik	0.001994	0.0325586	-1.33161	5.60403	14.1044
1600014K23Rik_CCDS53125.1_ex0_X:85269719-85269741:-_5-1	TTATTGCAGAACGAGGCCA	1600014K23Rik	0.016566	0.112473	0.913509	16.3634	8.68723
1600014K23Rik_CCDS53125.1_ex0_X:85269777-85269799:-_5-2	CCACTTCTGAGACTGACGC	1600014K23Rik	0.117399	0.302764	-0.535743	10.5834	15.3426
1600014K23Rik_CCDS53125.1_ex0_X:85269824-85269846:-_5-3	CCCTGGCGCTCGGTCAGCA	1600014K23Rik	0.317695	0.465543	-0.142007	31.9521	35.2572
1600014K23Rik_CCDS53125.1_ex0_X:85269855-85269877:-_5-4	TTGATTGGCAATTCTCCCA	1600014K23Rik	0.202561	0.394652	-0.357283	9.05705	11.6022
1600014K23Rik_CCDS53125.1_ex0_X:85269909-85269931:+_5-5	ATGGAGTGCGCGTTCCATC	1600014K23Rik	0.0633885	0.229525	-0.683555	8.78181	14.1044
1600015I10Rik_CCDS39484.2_ex0_6:48930189-48930211:-_5-1	CTCAGGTCTGCGAATACCC	1600015I10Rik	0.127718	0.31552	-0.53223	7.38058	10.6735
1600015I10Rik_CCDS39484.2_ex0_6:48930458-48930480:-_5-2	CTCGCATGTAGATTGGTAA	1600015I10Rik	0.0465148	0.193974	0.632375	17.8648	11.5248
1600015I10Rik_CCDS39484.2_ex0_6:48930492-48930514:+_5-3	GCCTGGGCACGATCCATCC	1600015I10Rik	0.488933	0.545104	0.0667763	17.3393	16.555
1600015I10Rik_CCDS39484.2_ex0_6:48930550-48930572:+_5-4	ATCTACCGTACGCTGACAG	1600015I10Rik	0.273997	0.437093	0.26869	18.3902	15.2652
1600015I10Rik_CCDS39484.2_ex0_6:48931003-48931025:+_5-5	GTTTCTAGCTATAACGTAG	1600015I10Rik	0.600959	0.624656	-0.286169	2.0259	2.47038
1600016N20Rik_CCDS40181.1_ex12_7:141213912-141213934:+_5-4	AGCTTAGCGCTCTGAGAAT	1600016N20Rik	0.135119	0.325175	0.576005	8.68172	5.82386
1600016N20Rik_CCDS40181.1_ex12_7:141213934-141213956:+_5-5	AAGGAGCCACTCTGTCGAC	1600016N20Rik	0.377382	0.498736	0.127998	8.50657	7.78436
1600016N20Rik_CCDS40181.1_ex6_7:141211850-141211872:-_5-1	ACGACTGGCCACCCATCCC	1600016N20Rik	0.202561	0.394652	-0.357283	9.05705	11.6022
1600016N20Rik_CCDS40181.1_ex6_7:141212021-141212043:+_5-2	GGTATACGTTTCGGAGGTC	1600016N20Rik	0.00976863	0.0827084	-0.979185	7.45565	14.6977
1600016N20Rik_CCDS40181.1_ex7_7:141212401-141212423:+_5-3	TCCGAATAGAAATTCAAGT	1600016N20Rik	0.632121	0.63387	0	1	1
1600029D21Rik_CCDS40619.1_ex0_9:50494643-50494665:+_5-1	AGTGATAATGGGTCCTGCG	1600029D21Rik	0.278608	0.439859	0.170982	24.6207	21.869
1600029D21Rik_CCDS40619.1_ex1_9:50499102-50499124:-_5-2	ACTGACTGAATCGTTCACG	1600029D21Rik	0.233031	0.420553	0.38378	12.2098	9.35792
1600029D21Rik_CCDS40619.1_ex1_9:50499129-50499151:+_5-3	ATCCTGAAAGCAGTGAAGG	1600029D21Rik	0.622753	0.63387	0.15667	2.35118	2.10923
1600029D21Rik_CCDS40619.1_ex1_9:50499219-50499241:+_5-4	TTGACATCCCAAAGCCAGT	1600029D21Rik	0.047098	0.195256	0.853212	12.385	6.85571
1600029D21Rik_CCDS40619.1_ex2_9:50501076-50501098:-_5-5	TGTGCGATTGACGACGATG	1600029D21Rik	0.0831614	0.254689	0.429138	28.2989	21.0177
1700001C02Rik_CCDS19158.1_ex1_5:30480394-30480416:-_5-1	GGAAGCCACACCGGGAACA	1700001C02Rik	0.000114521	0.00519227	-1.42778	6.93019	18.6445
1700001C02Rik_CCDS19158.1_ex1_5:30480414-30480436:-_5-2	CCATAAGAAGAGCCAAAGG	1700001C02Rik	0.209661	0.40088	-0.592483	4.80333	7.24265
1700001C02Rik_CCDS19158.1_ex1_5:30480488-30480510:+_5-3	GCTATGCGCTCCTCAGTGG	1700001C02Rik	0.632121	0.63387	-0.331087	1	1.25796
1700001C02Rik_CCDS19158.1_ex1_5:30480552-30480574:+_5-4	GACTGATAACTCACAGAAC	1700001C02Rik	0.356821	0.488402	0.279114	8.13124	6.70093
1700001C02Rik_CCDS19158.1_ex1_5:30480594-30480616:-_5-5	TGGTTGGATCGGCTGTAGG	1700001C02Rik	0.0824446	0.253374	0.558845	15.9131	10.8025
1700001C19Rik_CCDS28849.1_ex0_17:47413806-47413828:+_5-1	TCTGGGACAATGCCGTCAG	1700001C19Rik	0.329158	0.472924	0.224147	17.4394	14.9299
1700001C19Rik_CCDS28849.1_ex1_17:47433338-47433360:+_5-2	GAAAGCATTCTCTGCACAG	1700001C19Rik	0.494284	0.547387	0.0138215	2.67647	2.65095
1700001C19Rik_CCDS28849.1_ex2_17:47436606-47436628:-_5-3	AAATGCGAGCTACCTGGAC	1700001C19Rik	0.354277	0.486759	-0.357378	5.75416	7.37163
1700001C19Rik_CCDS28849.1_ex2_17:47436620-47436642:+_5-4	CGCATTTCCAGGCGAGCGG	1700001C19Rik	0.169223	0.362944	-0.302951	19.316	23.8295
1700001C19Rik_CCDS28849.1_ex2_17:47436654-47436676:+_5-5	CACCTGTCGCCGGGTGCGC	1700001C19Rik	0.00572311	0.0596163	0.530174	53.7462	37.2177
1700001J03Rik_CCDS51699.1_ex3_5:146184745-146184767:+_5-1	CACTCACGTTGTCATCAGC	1700001J03Rik	0.182592	0.37622	0.387102	12.7102	9.71907
1700001J03Rik_CCDS51699.1_ex3_5:146184785-146184807:+_5-2	CTAGCGTACGATGGGTACA	1700001J03Rik	0.101772	0.281613	-0.684403	5.4539	8.76461
1700001J03Rik_CCDS51699.1_ex3_5:146184834-146184856:+_5-3	CATTATGCTGAACAGCAGC	1700001J03Rik	0.279605	0.440983	-0.466563	5.27874	7.29424
1700001J03Rik_CCDS51699.1_ex3_5:146184877-146184899:-_5-4	TATAACAGCCCAGAATACG	1700001J03Rik	0.264241	0.430654	-0.888515	1	1.85127
1700001J03Rik_CCDS51699.1_ex3_5:146184896-146184918:+_5-5	TAGTTGAATCGGGGGCGCC	1700001J03Rik	0.396262	0.507994	0.115315	12.7353	11.757
1700001K19Rik_CCDS49175.1_ex1_12:110668680-110668702:-_5-1	GGGTGAACTAAAGACCAAC	1700001K19Rik	0.468478	0.537642	-0.271883	4.50307	5.43692
1700001K19Rik_CCDS49175.1_ex1_12:110668720-110668742:+_5-2	CATGGACTTCGAGGGCTGC	1700001K19Rik	0.349153	0.484006	0.132942	18.6905	17.0452
1700001K19Rik_CCDS49175.1_ex1_12:110668844-110668866:+_5-4	GTTGCGGTTCCTATCACCC	1700001K19Rik	0.00245513	0.0369889	-1.03845	10.3832	21.3273
1700001K19Rik_CCDS49175.1_ex1_12:110668895-110668917:+_5-5	GCGATAGTTGGAATGACCT	1700001K19Rik	0.0624566	0.227658	-0.528699	14.4618	20.863
1700001L19Rik_CCDS49306.1_ex0_13:68597615-68597637:-_5-1	GGTCGGGGTTTGCCACGCA	1700001L19Rik	0.00378313	0.0466434	0.86744	26.2971	14.414
1700001L19Rik_CCDS49306.1_ex0_13:68597660-68597682:+_5-2	TTTCAGCTACATCCCACCA	1700001L19Rik	0.355293	0.487709	0.242951	13.4859	11.3958
1700001L19Rik_CCDS49306.1_ex0_13:68597701-68597723:+_5-3	GCAGCTACTTCAGTCGCGA	1700001L19Rik	0.047292	0.195685	-0.715268	9.95784	16.3487
1700001L19Rik_CCDS49306.1_ex1_13:68611175-68611197:-_5-4	CTTAAAAACACAGTCATAG	1700001L19Rik	0.108821	0.291233	-1.28214	1.8007	4.37928
1700001L19Rik_CCDS49306.1_ex1_13:68611253-68611275:-_5-5	CTCATTAATATGGAGCCCC	1700001L19Rik	0.338323	0.477938	-0.211357	5.65407	6.54615
1700001O22Rik_CCDS15885.1_ex6_2:30801130-30801152:+_5-1	CGGCCTCACGGTCCGCCTC	1700001O22Rik	0.417512	0.516913	-0.114479	13.8863	15.0331
1700001O22Rik_CCDS15885.1_ex6_2:30801227-30801249:-_5-2	CGCGACAACCCTGACTCCC	1700001O22Rik	0.034332	0.164286	0.75213	14.762	8.76461
1700001O22Rik_CCDS15885.1_ex6_2:30801312-30801334:+_5-3	GGCAGTAGCAGTGCGCGCG	1700001O22Rik	0.212515	0.403374	0.278371	23.1444	19.083
1700001O22Rik_CCDS15885.1_ex6_2:30801337-30801359:-_5-4	CGAACGCTCGGCGAGACCG	1700001O22Rik	0.0187751	0.117173	0.718404	22.0184	13.3821
1700001O22Rik_CCDS15885.1_ex6_2:30801408-30801430:-_5-5	GCGAGATGTAGACGGCGCG	1700001O22Rik	0.0691228	0.240535	-0.544357	11.334	16.5292
1700001P01Rik_CCDS36297.1_ex2_11:97775652-97775674:+_5-1	TGATCAGTTTTCCGCAAAA	1700001P01Rik	0.253115	0.430654	-0.447345	5.10359	6.95889
1700001P01Rik_CCDS36297.1_ex2_11:97775672-97775694:+_5-2	GGGCGGAACCACGCGGCTC	1700001P01Rik	0.149264	0.341318	0.297919	25.5215	20.7598
1700001P01Rik_CCDS36297.1_ex2_11:97775690-97775712:+_5-3	CCGGAAGTACCGACGACTG	1700001P01Rik	7.48e-05	0.00404411	1.4895	18.8156	6.70093
1700001P01Rik_CCDS36297.1_ex2_11:97775717-97775739:-_5-4	CCGCCTTATAATCCTCAAC	1700001P01Rik	0.163494	0.356802	0.47316	14.3867	10.364
1700001P01Rik_CCDS36297.1_ex2_11:97775736-97775758:+_5-5	GGAATTGCAGACCACAGCT	1700001P01Rik	0.295609	0.45154	-0.311251	9.93282	12.3245
1700003E16Rik_CCDS51818.1_ex1_6:83160981-83161003:+_5-1	CGCAGGTGGACATCGTGCC	1700003E16Rik	0.0605854	0.224127	-0.510072	16.9139	24.0875
1700003E16Rik_CCDS51818.1_ex2_6:83161342-83161364:-_5-2	AATCCGTAGTGCATGCCAG	1700003E16Rik	3.4e-06	0.000488737	-1.34263	12.6102	31.9811
1700003E16Rik_CCDS51818.1_ex2_6:83161399-83161421:-_5-3	CCTCTACACAAACGGGCGC	1700003E16Rik	0.0837983	0.255953	0.50294	18.8907	13.3305
1700003E16Rik_CCDS51818.1_ex3_6:83161770-83161792:+_5-4	CTTTACGATCTACGGCGGA	1700003E16Rik	0.292753	0.449569	0.253727	17.3393	14.5429
1700003E16Rik_CCDS51818.1_ex3_6:83161916-83161938:-_5-5	GTCCCCTGCCGCGTCTGGC	1700003E16Rik	0.103245	0.283741	0.275605	53.2958	44.0278
1700003F12Rik_CCDS16933.1_ex0_2:154549033-154549055:+_5-1	GTTCTTCAGCCATCTCAAG	1700003F12Rik	0.085974	0.25846	0.565834	13.6611	9.22894
1700003F12Rik_CCDS16933.1_ex1_2:154549359-154549381:-_5-2	GCGGGGGTTCTCACCCACA	1700003F12Rik	0.000562936	0.0149165	-2.19561	1.8007	8.24869
1700003F12Rik_CCDS16933.1_ex2_2:154549545-154549567:+_5-3	ATCGTGCTGCTTTTCCCGC	1700003F12Rik	0.0812037	0.251355	0.399392	33.4034	25.3257
1700003F12Rik_CCDS16933.1_ex2_2:154549603-154549625:-_5-4	GCCGCACCGGCCTCACAAA	1700003F12Rik	0.0171231	0.114641	0.807937	16.5636	9.46111
1700003F12Rik_CCDS16933.1_ex2_2:154549615-154549637:-_5-5	GGTCCTCAGTTGGCCGCAC	1700003F12Rik	0.0907432	0.265819	0.394306	30.2006	22.9782
1700003M02Rik_CCDS18031.2_ex4_4:34719686-34719708:+_5-1	GGCCGTGTAGCGAAACGCC	1700003M02Rik	0.364466	0.492365	0.303135	8.33142	6.75252
1700003M02Rik_CCDS18031.2_ex4_4:34719757-34719779:+_5-2	TCGCTTCGTGGAGAATGGC	1700003M02Rik	0.0040361	0.048542	1.08066	17.0641	8.06812
1700003M02Rik_CCDS18031.2_ex5_4:34721462-34721484:+_5-3	CGAATTCCGGTAACAATCA	1700003M02Rik	0.145252	0.336657	0.992294	5.47892	2.75413
1700003M02Rik_CCDS18031.2_ex6_4:34722756-34722778:-_5-4	TCACCGGGTCTTAGAATCC	1700003M02Rik	0.0265985	0.142196	0.900182	13.0355	6.98469
1700003M02Rik_CCDS18031.2_ex7_4:34724814-34724836:-_5-5	ATATGAACTATACAAGTCG	1700003M02Rik	0.264241	0.430654	-0.928171	1	1.90286
1700006A11Rik_CCDS51064.1_ex6_3:124414334-124414356:+_5-1	ATCCCGAGTTGCAGGAACG	1700006A11Rik	0.215188	0.405836	0.527067	8.20631	5.69488
1700006A11Rik_CCDS51064.1_ex6_3:124414354-124414376:+_5-2	GGCAGACATAGGATACATG	1700006A11Rik	0.284822	0.444143	-0.488125	4.428	6.2108
1700006A11Rik_CCDS51064.1_ex8_3:124419290-124419312:-_5-3	ATGCCACGCCCTAAAAGAA	1700006A11Rik	0.212894	0.403865	-0.463179	7.40561	10.2092
1700006A11Rik_CCDS51064.1_ex9_3:124419820-124419842:-_5-4	CCCTGCCAGTTACTAAGAG	1700006A11Rik	0.315103	0.463701	0.201106	12.6852	11.0347
1700006A11Rik_CCDS51064.1_ex9_3:124419875-124419897:-_5-5	ATAACTCAAGTATTCCACA	1700006A11Rik	0.506945	0.55377	-0.396291	1.70061	2.23821
1700006E09Rik_CCDS48938.1_ex0_11:101987216-101987238:+_5-1	ACAAAAATAGAGTACAAAT	1700006E09Rik	0.632121	0.63387	0	1	1
1700006E09Rik_CCDS48938.1_ex1_11:101987952-101987974:-_5-2	GAGGTTTGGTATCGACGGC	1700006E09Rik	0.352502	0.485955	-0.174191	9.48242	10.6993
1700006E09Rik_CCDS48938.1_ex2_11:101988442-101988464:-_5-3	GATTCTCTTTTGTTCACCC	1700006E09Rik	0.536642	0.571382	-0.000542811	11.9846	11.9891
1700006E09Rik_CCDS48938.1_ex2_11:101988528-101988550:-_5-4	TCATTCCAGCAGTCCACCT	1700006E09Rik	0.169766	0.363369	0.358807	16.7638	13.0726
1700007B14Rik_CCDS52603.1_ex2_8:75577830-75577852:+_5-1	TAATGTAGTTCAAGAACAT	1700007B14Rik	0.0532002	0.208371	1.37518	5.20368	2.00605
1700007B14Rik_CCDS52603.1_ex2_8:75577890-75577912:-_5-2	TCAATTAAAGCTGTGCACT	1700007B14Rik	0.23926	0.425723	0.358391	8.6567	6.75252
1700007B14Rik_CCDS52603.1_ex2_8:75577940-75577962:-_5-3	CTTTTATATTCGACACATG	1700007B14Rik	0.000101276	0.004827	-2.19157	2.20105	10.0544
1700007B14Rik_CCDS52603.1_ex4_8:75629748-75629770:-_5-4	AAGAGGCCAGATTATGCAA	1700007B14Rik	0.427516	0.521605	0.219306	7.23045	6.2108
1700007B14Rik_CCDS52603.1_ex5_8:75669432-75669454:-_5-5	GCAGATCCATGAGGCAAAT	1700007B14Rik	0.00636151	0.0634815	-1.21025	5.10359	11.8085
1700007G11Rik_CCDS19456.1_ex0_5:98329440-98329462:+_5-1	ACGGTCGACCTGTACTACC	1700007G11Rik	0.188259	0.381836	-0.46331	7.18041	9.89964
1700007G11Rik_CCDS19456.1_ex0_5:98329458-98329480:-_5-2	CGGACCCGCGCTTACCTCC	1700007G11Rik	0.386036	0.503374	0.0998115	14.5619	13.5885
1700007G11Rik_CCDS19456.1_ex1_5:98346253-98346275:+_5-3	TGGTGGAGCTAGGCTACCG	1700007G11Rik	0.182936	0.376514	-0.575511	6.27962	9.35792
1700007G11Rik_CCDS19456.1_ex2_5:98498285-98498307:+_5-4	TAGGACACTGACAAGCGCG	1700007G11Rik	0.0111742	0.0893042	-1.22849	4.2028	9.84805
1700007G11Rik_CCDS19456.1_ex2_5:98498328-98498350:+_5-5	CTGAAAGCCCTGGCGATGA	1700007G11Rik	0.110415	0.293609	0.368667	25.7717	19.9601
1700007K09Rik_CCDS21912.1_ex0_7:131326265-131326287:+_5-1	TCTCATGGGGGTCCTTGCA	1700007K09Rik	0.315608	0.463905	0.15102	30.1255	27.1314
1700007K09Rik_CCDS21912.1_ex0_7:131326311-131326333:-_5-2	TTCTTAAGAATCGCAAAGG	1700007K09Rik	5.74e-07	0.000138752	1.69941	24.946	7.68118
1700007K09Rik_CCDS21912.1_ex1_7:131327176-131327198:+_5-3	ATTGTTCATTCTTACCCAG	1700007K09Rik	0.403367	0.511428	-0.0824084	12.7853	13.5369
1700007K09Rik_CCDS21912.1_ex1_7:131327191-131327213:-_5-4	CAAGGCTCTGAAGTCCCCT	1700007K09Rik	0.29219	0.44919	-0.225274	14.5368	16.9936
1700007K09Rik_CCDS21912.1_ex1_7:131327208-131327230:-_5-5	CTTTACTCCAAAATATCCA	1700007K09Rik	0.401856	0.510826	0.247047	6.05442	5.10157
1700007K13Rik_CCDS15837.1_ex1_2:28465137-28465159:+_5-1	GGCATCTCATGCACCGTGG	1700007K13Rik	0.226592	0.415789	0.279064	16.7388	13.7948
1700007K13Rik_CCDS15837.1_ex2_2:28466028-28466050:-_5-2	GGTTTCATGGCTACGGGTA	1700007K13Rik	0.000662887	0.0160269	-1.89443	2.80158	10.4156
1700007K13Rik_CCDS15837.1_ex2_2:28466051-28466073:-_5-3	AGTCAGGTTCAACAACCCG	1700007K13Rik	0.332766	0.474616	-0.190371	12.1347	13.8464
1700007K13Rik_CCDS15837.1_ex2_2:28466066-28466088:-_5-4	TAGCGAGAAGCTCCCAGTC	1700007K13Rik	0.0802617	0.250219	0.697499	10.9087	6.72673
1700007K13Rik_CCDS15837.1_ex2_2:28466084-28466106:+_5-5	CTAATGCGGTAGTAGTCGC	1700007K13Rik	0.409476	0.513932	0.102583	11.7094	10.9057
1700008A04Rik_CCDS48767.1_ex0_11:32820638-32820660:-_5-1	AGAGCCATTAAGGACCCTC	1700008A04Rik	0.499819	0.549947	0.124381	6.17953	5.66909
1700008A04Rik_CCDS48767.1_ex1_11:32821870-32821892:+_5-2	TGAAAGTGGTTGCAGTCCT	1700008A04Rik	0.371065	0.49574	-0.141182	15.3626	16.942
1700008A04Rik_CCDS48767.1_ex1_11:32821887-32821909:-_5-3	GAAGTGTCAGGACAGACCA	1700008A04Rik	0.0104548	0.0859219	-0.77144	14.9122	25.4547
1700008A04Rik_CCDS48767.1_ex2_11:32822095-32822117:+_5-4	ACCTGATATCCCCATACCC	1700008A04Rik	0.359542	0.489592	-0.190061	13.3358	15.2136
1700008A04Rik_CCDS48767.1_ex3_11:32824431-32824453:-_5-5	AAGTCACCACTGTGATGAC	1700008A04Rik	0.123763	0.310577	-0.598299	5.70412	8.63563
1700008F21Rik_CCDS52713.1_ex0_8:129072559-129072581:-_7-1	ATTTTATCAGGTGTCGACT	1700008F21Rik	0.277974	0.439741	-0.314767	11.6093	14.4397
1700008F21Rik_CCDS52713.1_ex0_8:129072645-129072667:-_7-2	AATCTTTCATCATAGTCGA	1700008F21Rik	0.581559	0.606453	-0.111415	4.07769	4.40508
1700008F21Rik_CCDS52713.1_ex11_8:129178236-129178258:-_7-7	CATCTCTGACTTTTGAGGT	1700008F21Rik	0.487822	0.545033	-0.066207	12.5601	13.1499
1700008F21Rik_CCDS52713.1_ex8_8:129145558-129145580:+_7-3	TGAAGAAAAACCTGCTAGA	1700008F21Rik	0.00365985	0.0457028	-2.29895	1	4.921
1700008F21Rik_CCDS52713.1_ex8_8:129145571-129145593:+_7-4	GCTAGAAGGTGAAATACAA	1700008F21Rik	0.264241	0.430654	-0.784328	1	1.72229
1700008F21Rik_CCDS52713.1_ex8_8:129145591-129145613:+_7-5	GGCTGAGAGATCCCGAGGT	1700008F21Rik	0.000663804	0.0160405	-1.37723	6.15451	15.9875
1700008F21Rik_CCDS52713.1_ex9_8:129163852-129163874:+_7-6	TAGAGCGAACTAAGAAACC	1700008F21Rik	0.264241	0.430654	-0.784328	1	1.72229
1700008I05Rik_CCDS41129.1_ex3_X:135659193-135659215:-_5-1	ACTTGATTGCACCACAAAA	1700008I05Rik	0.271594	0.435886	-0.433572	7.00526	9.46111
1700008I05Rik_CCDS41129.1_ex4_X:135660549-135660571:+_5-2	TTTCATCAGGCCTAAAACT	1700008I05Rik	0.133651	0.32296	0.80548	4.67822	2.67674
1700008I05Rik_CCDS41129.1_ex5_X:135664435-135664457:+_5-3	TCTAATTGGTGCGCACATG	1700008I05Rik	0.184023	0.377597	0.0769195	306.092	290.2
1700008I05Rik_CCDS41129.1_ex5_X:135664560-135664582:+_5-4	TTCTTAGAAGATTCTGACG	1700008I05Rik	0.0189882	0.117173	-1.80827	1	3.50222
1700008I05Rik_CCDS41129.1_ex6_X:135665495-135665517:+_5-5	GTACATTGTCTCCACGAAT	1700008I05Rik	0.0308861	0.154511	-1.06305	3.60228	7.5264
1700008O03Rik_CCDS52230.1_ex1_7:44361062-44361084:-_5-1	ATGTCATCTGCGGTACTGC	1700008O03Rik	0.0809953	0.251052	0.406244	30.0754	22.6945
1700008O03Rik_CCDS52230.1_ex1_7:44361078-44361100:+_5-2	GACATTCATATTCTCGTAG	1700008O03Rik	0.147932	0.339695	0.531874	8.60666	5.95284
1700008O03Rik_CCDS52230.1_ex2_7:44362648-44362670:+_5-3	CACCGAAGTCTCCATGCAA	1700008O03Rik	0.110281	0.293348	-0.700016	5.55399	9.02258
1700008O03Rik_CCDS52230.1_ex2_7:44362741-44362763:+_5-4	TTCCGAGATGACCTGCCGC	1700008O03Rik	0.0664677	0.235607	-0.511568	15.4126	21.9722
1700008O03Rik_CCDS52230.1_ex3_7:44362930-44362952:+_5-5	GGGAGTACTCACGAGGACT	1700008O03Rik	0.341586	0.479972	0.358092	8.45653	6.59775
1700008P02Rik_CCDS50858.1_ex2_3:6620020-6620042:+_5-1	GTGGCTAGTTTTCTGATCA	1700008P02Rik	0.184964	0.378666	0.396975	13.9864	10.6219
1700008P02Rik_CCDS50858.1_ex2_3:6620049-6620071:+_5-2	CTACGGAACTGGTTGATGG	1700008P02Rik	0.386984	0.503587	-0.109113	19.3911	20.9146
1700008P02Rik_CCDS50858.1_ex2_3:6620109-6620131:+_5-3	AATGGGCGGGAGGTTCGAA	1700008P02Rik	0.501724	0.550841	0.117234	8.33142	7.68118
1700008P02Rik_CCDS50858.1_ex2_3:6620144-6620166:+_5-4	AAGGAAAGTTTAGTAAGGC	1700008P02Rik	0.591079	0.615273	-0.00675859	4.12774	4.14712
1700008P02Rik_CCDS50858.1_ex2_3:6620261-6620283:+_5-5	TGGTGACAAGCCTGAACGT	1700008P02Rik	0.00318138	0.0434169	0.631318	44.6632	28.834
1700009N14Rik_CCDS38709.1_ex0_4:39450882-39450904:-_5-1	TTCAAATTCACCAGTCAAG	1700009N14Rik	0.207504	0.399076	-0.374769	9.10709	11.8085
1700009N14Rik_CCDS38709.1_ex0_4:39450965-39450987:+_5-2	GCCCATCAAGTTTAACGTC	1700009N14Rik	0.432827	0.523559	-0.0629858	5.27874	5.51431
1700009N14Rik_CCDS38709.1_ex0_4:39451027-39451049:+_5-3	GCTATTACATCCAAGCCCA	1700009N14Rik	0.316809	0.464939	0.154723	22.7941	20.476
1700009N14Rik_CCDS38709.1_ex0_4:39451100-39451122:-_5-4	ACCAGATCCCTATGCCAGT	1700009N14Rik	0.525803	0.564262	0.00695349	26.122	25.9964
1700009N14Rik_CCDS38709.1_ex0_4:39451224-39451246:-_5-5	TGAAATGTCGTAATACTGA	1700009N14Rik	0.0738458	0.248299	1.14078	4.87839	2.21241
1700009P17Rik_CCDS35771.1_ex2_1:171125298-171125320:+_5-1	GATCATCGCCAACGATCGA	1700009P17Rik	0.0110708	0.0887973	0.921363	17.039	8.99678
1700009P17Rik_CCDS35771.1_ex2_1:171125330-171125352:-_5-2	CCTTGGAACGGGGCACTGA	1700009P17Rik	0.0571148	0.21686	-0.737519	7.856	13.0984
1700009P17Rik_CCDS35771.1_ex3_1:171126040-171126062:-_5-3	TGCCCATGAAGGAACCCCA	1700009P17Rik	0.00365985	0.0457028	-2.23715	1	4.71463
1700009P17Rik_CCDS35771.1_ex3_1:171126101-171126123:-_5-4	GTAGTTGTACGGGCGGTCA	1700009P17Rik	0.130245	0.31856	-0.358455	22.1685	28.4212
1700009P17Rik_CCDS35771.1_ex3_1:171126125-171126147:+_5-5	TGCCGACAACCTCACCAAA	1700009P17Rik	0.00149025	0.0271358	-2.01316	2.10096	8.48086
1700010B08Rik_CCDS50816.1_ex2_2:173721776-173721798:+_5-1	CACAATATAGAAATACCGC	1700010B08Rik	0.113491	0.297616	0.599267	9.6826	6.39138
1700010B08Rik_CCDS50816.1_ex2_2:173721794-173721816:+_5-2	CAGGAGAAAGAGGAAACCA	1700010B08Rik	0.264241	0.430654	-0.718001	1	1.6449
1700010B08Rik_CCDS50816.1_ex2_2:173721811-173721833:-_5-3	GAGCAGCGTTCTCTTTCCA	1700010B08Rik	0.0811746	0.251274	-0.510633	12.435	17.7158
1700010B08Rik_CCDS50816.1_ex2_2:173721836-173721858:-_5-4	GAGTTTCGGATTGAGAGTC	1700010B08Rik	0.45919	0.534161	0.0807993	10.9337	10.3382
1700010B08Rik_CCDS50816.1_ex2_2:173721863-173721885:+_5-5	TGTCTCCACAGGCTTCTCC	1700010B08Rik	0.360953	0.490612	0.171429	19.341	17.1741
Gm5941_CCDS53134.1_ex0_X:92490249-92490271:-_5-5	CTTCTTGCTACATTTGGAC	Gm5941	0.13175	0.320944	0.316122	35.4802	28.4986
1700010D01Rik_CCDS53138.1_ex1_X:95732996-95733018:+_5-1	CTTCTTGCTACATTTGGAC	1700010D01Rik	0.13175	0.320944	0.316122	35.4802	28.4986
Gm5941_CCDS53134.1_ex0_X:92490196-92490218:-_5-4	GCTCAGCAGTCGAGGTTGA	Gm5941	0.204375	0.396201	-0.227629	25.3963	29.7368
1700010D01Rik_CCDS53138.1_ex1_X:95733049-95733071:+_5-2	GCTCAGCAGTCGAGGTTGA	1700010D01Rik	0.204375	0.396201	-0.227629	25.3963	29.7368
Gm5941_CCDS53134.1_ex0_X:92490177-92490199:-_5-3	TGGCTCAACATCAGGTGTG	Gm5941	0.301368	0.454993	-0.115199	36.481	39.5135
1700010D01Rik_CCDS53138.1_ex1_X:95733068-95733090:+_5-3	TGGCTCAACATCAGGTGTG	1700010D01Rik	0.301368	0.454993	-0.115199	36.481	39.5135
1700010D01Rik_CCDS53138.1_ex1_X:95733102-95733124:+_5-4	GTCTTGGGTTCGGAAGTCC	1700010D01Rik	0.00480675	0.053931	0.813767	24.5206	13.9496
1700010D01Rik_CCDS53138.1_ex1_X:95733121-95733143:+_5-5	AGGTTGATGGCACAGCATC	1700010D01Rik	0.344848	0.481703	-0.103537	34.3041	36.8565
Gm5941_CCDS53134.1_ex0_X:92490124-92490146:-_5-1	AGGTTGATGGCACAGCATC	Gm5941	0.344848	0.481703	-0.103537	34.3041	36.8565
1700010I14Rik_CCDS28385.2_ex1_17:8992211-8992233:+_5-1	GCACTGGCGCAATTCCAAC	1700010I14Rik	0.339547	0.478618	-0.156419	15.9881	17.819
1700010I14Rik_CCDS28385.2_ex1_17:8992390-8992412:-_5-2	CACGGGAGGCCTGTACGCG	1700010I14Rik	0.332766	0.474616	-0.235355	12.1347	14.285
1700010I14Rik_CCDS28385.2_ex1_17:8992577-8992599:-_5-3	CGGTACACATCCCTGCCTG	1700010I14Rik	0.330988	0.473827	0.148785	32.4525	29.2725
1700010I14Rik_CCDS28385.2_ex1_17:8992608-8992630:-_5-4	CGTTATACCAGCTAGGTAG	1700010I14Rik	0.224182	0.413563	-0.305382	11.0588	13.6659
1700010I14Rik_CCDS28385.2_ex1_17:8992698-8992720:+_5-5	TATGACTTCACGGGGAGCA	1700010I14Rik	0.369501	0.495194	0.140784	15.863	14.3882
1700011A15Rik_CCDS37217.1_ex2_15:101452379-101452401:-_5-1	GGCTTTTCTGTAGTTCACA	1700011A15Rik	0.52465	0.563627	0.131301	7.48067	6.82991
1700011A15Rik_CCDS37217.1_ex2_15:101452412-101452434:+_5-2	CCATGCCGGATGCGGCCTC	1700011A15Rik	0.0384331	0.174983	0.464775	36.0557	26.1254
1700011A15Rik_CCDS37217.1_ex2_15:101452424-101452446:+_5-3	CGGCCTCAGGCAGCGCTAA	1700011A15Rik	0.0705428	0.242914	0.697121	11.9095	7.34583
1700011A15Rik_CCDS37217.1_ex2_15:101452498-101452520:+_5-4	CGGCAGCTACGTGAGTACC	1700011A15Rik	0.405574	0.512458	-0.093195	15.7129	16.7614
1700011A15Rik_CCDS37217.1_ex2_15:101452520-101452542:+_5-5	AGCTCATGATCGTCAAACT	1700011A15Rik	0.418785	0.517362	-0.195624	8.0812	9.25474
1700011E24Rik_CCDS50206.1_ex3_17:87411547-87411569:-_5-1	TACGAGGTACTTCCAGCAC	1700011E24Rik	0.00306873	0.0424991	-1.1664	7.18041	16.1165
1700011E24Rik_CCDS50206.1_ex3_17:87411562-87411584:-_5-2	CTTTGCCCGGGACAGTACG	1700011E24Rik	0.129701	0.318237	0.374474	20.6922	15.9617
1700011E24Rik_CCDS50206.1_ex4_17:87422590-87422612:+_5-3	GCAGCTCCAAGAAGTCAGG	1700011E24Rik	0.0184396	0.117173	0.888605	14.9372	8.06812
1700011E24Rik_CCDS50206.1_ex4_17:87422639-87422661:-_5-4	CTTGTGCTGAGAAACGATC	1700011E24Rik	0.0588862	0.220778	-1.10764	2.72651	5.87546
1700011E24Rik_CCDS50206.1_ex4_17:87422755-87422777:-_5-5	CACAGGATACTCCGATACC	1700011E24Rik	0.00104353	0.0215315	1.03422	25.3463	12.3761
1700011H14Rik_CCDS26996.1_ex3_14:49235927-49235949:+_5-1	AGAGGTAATTGCTTGTGGC	1700011H14Rik	0.329431	0.47299	0.266187	4.55311	3.78597
1700011H14Rik_CCDS26996.1_ex4_14:49243803-49243825:-_5-2	CCAATCTTTCCAGTATCCA	1700011H14Rik	0.0103833	0.0856383	-1.12368	6.12949	13.3563
1700011H14Rik_CCDS26996.1_ex5_14:49245025-49245047:+_5-3	TTGGTTTTGCCATACCTGC	1700011H14Rik	0.248702	0.430654	-0.238117	16.8138	19.8311
1700011H14Rik_CCDS26996.1_ex5_14:49245088-49245110:-_5-4	ACCAGAATCGAACTCGAGA	1700011H14Rik	0.363488	0.491908	0.235627	12.385	10.5187
1700011H14Rik_CCDS26996.1_ex5_14:49245110-49245132:-_5-5	AGCTCATTCACGAGACTGC	1700011H14Rik	0.00508007	0.0556483	-1.29372	4.95346	12.1439
1700011I03Rik_CCDS50295.1_ex1_18:57538029-57538051:-_5-1	TAACTTCCAAGCATCGACC	1700011I03Rik	0.00596968	0.0610155	-1.54421	2.65145	7.73277
1700011I03Rik_CCDS50295.1_ex2_18:57563985-57564007:+_5-2	CACTTGGAGATTTGCCTGA	1700011I03Rik	0.00181425	0.0307015	-0.906472	14.3367	26.8735
1700011I03Rik_CCDS50295.1_ex3_18:57592037-57592059:+_5-3	ATGTGAACCGAAAGAACGT	1700011I03Rik	0.135119	0.325175	0.625058	8.98198	5.82386
1700011I03Rik_CCDS50295.1_ex4_18:57594075-57594097:-_5-4	TTGCAACTTCTCAATGCAC	1700011I03Rik	0.436225	0.52499	-0.161345	8.20631	9.17735
1700011I03Rik_CCDS50295.1_ex4_18:57594110-57594132:-_5-5	ATGTTAAGTTTCTCCTGGG	1700011I03Rik	0.0439527	0.18842	0.642538	20.3669	13.0468
1700011L22Rik_CCDS52605.1_ex2_8:79214884-79214906:+_5-1	TAACTTACAGGGGGACATA	1700011L22Rik	0.0106716	0.0870374	-2.07761	1.30026	5.48851
1700011L22Rik_CCDS52605.1_ex3_8:79220273-79220295:-_5-2	GATATAGCAAGCCCCTCCA	1700011L22Rik	0.00570415	0.0594943	-1.18209	6.32966	14.3624
1700011L22Rik_CCDS52605.1_ex4_8:79229343-79229365:-_5-3	ACACTCTACCCGGCCACGC	1700011L22Rik	0.0837983	0.255953	0.495276	18.7906	13.3305
1700011L22Rik_CCDS52605.1_ex5_8:79248351-79248373:-_5-4	ACGCAAGGCCCAACAACTG	1700011L22Rik	0.0822401	0.253252	0.5858	12.5351	8.35188
1700011L22Rik_CCDS52605.1_ex5_8:79248365-79248387:-_5-5	TTCGAACTGATCAGACGCA	1700011L22Rik	0.012188	0.093891	-1.04613	6.95521	14.3624
1700012A03Rik_CCDS19984.1_ex0_6:32051723-32051745:-_5-1	GAAACAGGAAGTACCTCAG	1700012A03Rik	0.284753	0.444143	0.357485	4.55311	3.55381
1700012A03Rik_CCDS19984.1_ex1_6:32058472-32058494:+_5-2	TCTCCTCTAGTTCAAGATC	1700012A03Rik	0.120983	0.307103	-0.669384	4.87839	7.75857
1700012A03Rik_CCDS19984.1_ex1_6:32058491-32058513:+_5-3	TGGAGTCACTCTAGAGGAG	1700012A03Rik	0.270392	0.434996	-0.230976	11.5342	13.5369
1700012A03Rik_CCDS19984.1_ex1_6:32058549-32058571:-_5-4	CTGCGCCCTCTTCTGCAGC	1700012A03Rik	0.359934	0.489811	-0.108658	23.895	25.7642
1700012A03Rik_CCDS19984.1_ex1_6:32058578-32058600:-_5-5	CTGCAGCCACTTCTGCAGC	1700012A03Rik	0.282279	0.442588	0.2505	20.4921	17.2257
1700012B07Rik_CCDS48972.1_ex1_11:109794227-109794249:+_5-1	TGTCCATAAGGTGCCGGAA	1700012B07Rik	0.050865	0.203663	0.534729	24.0201	16.5808
1700012B07Rik_CCDS48972.1_ex1_11:109794270-109794292:-_5-2	GGTCCTTTGCAGGCACGTA	1700012B07Rik	0.08278	0.253779	0.1747	137.745	122.035
1700012B07Rik_CCDS48972.1_ex2_11:109797277-109797299:-_5-3	AAGATGAGTCCTCACAGAA	1700012B07Rik	0.160303	0.353526	0.50601	13.4359	9.46111
1700012B07Rik_CCDS48972.1_ex2_11:109797381-109797403:-_5-4	ACAGCAAAGTCGTTGGACA	1700012B07Rik	0.254703	0.430654	0.299321	10.6585	8.66143
1700012B07Rik_CCDS48972.1_ex3_11:109813670-109813692:-_5-5	CACCACTCATCCCACGGTC	1700012B07Rik	0.00404892	0.048542	0.874363	23.87	13.021
1700012B09Rik_CCDS40536.1_ex1_9:14761704-14761726:+_5-1	AATGCTCCAGATTCCATCC	1700012B09Rik	0.171267	0.364467	0.475688	13.3358	9.59009
1700012B09Rik_CCDS40536.1_ex2_9:14766856-14766878:-_5-2	ATGTGAAAAGCCCACCTAC	1700012B09Rik	0.0125491	0.0954292	0.913483	17.1892	9.12576
1700012B09Rik_CCDS40536.1_ex2_9:14766920-14766942:-_5-3	GAACCGCATAAGAGAATCA	1700012B09Rik	0.264241	0.430654	-1.28959	1	2.44458
1700012B09Rik_CCDS40536.1_ex3_9:14770839-14770861:+_5-4	TTGTTGGCGAGACTCTTGG	1700012B09Rik	0.00179024	0.0304435	0.973876	25.3213	12.892
1700012B09Rik_CCDS40536.1_ex3_9:14770862-14770884:-_5-5	GCACCCGTGCTGAGCCTGG	1700012B09Rik	0.00259884	0.0383431	0.830383	30.1255	16.942
1700012L04Rik_CCDS40856.1_ex0_X:9284061-9284083:-_1-1	GTTACGCGCTTCCTGCCAG	1700012L04Rik	0.478204	0.541174	-0.0205891	17.4394	17.6901
1700012P22Rik_CCDS51365.1_ex1_4:144419764-144419786:-_5-1	CTATGATGACCACTACAAC	1700012P22Rik	0.302516	0.456028	-0.382037	6.32966	8.24869
1700012P22Rik_CCDS51365.1_ex1_4:144419789-144419811:+_5-2	TGATCAGATAGCGATGCGA	1700012P22Rik	0.0400892	0.179019	-0.719565	8.95696	14.7493
1700012P22Rik_CCDS51365.1_ex1_4:144419832-144419854:+_5-3	GTGCTTGTACGGGAGACCC	1700012P22Rik	0.301118	0.454771	-0.263665	11.8345	14.2076
1700012P22Rik_CCDS51365.1_ex2_4:144423778-144423800:-_5-4	TATTCGAAAAGTAAAATGG	1700012P22Rik	0.077894	0.250219	1.37332	4.12774	1.59331
1700012P22Rik_CCDS51365.1_ex2_4:144423845-144423867:+_5-5	TCCTTCCTGTAAATGCACT	1700012P22Rik	0.159837	0.353169	-0.608771	4.428	6.75252
1700013D24Rik_CCDS51906.1_ex1_6:124356409-124356431:-_5-1	TGAAGATGAACCATCTGGG	1700013D24Rik	0.170267	0.363531	0.388408	19.4411	14.8525
1700013D24Rik_CCDS51906.1_ex1_6:124356458-124356480:+_5-2	AACATTGCGCAGAGAACAT	1700013D24Rik	0.0803014	0.250219	-1.3924	1	2.62515
1700013D24Rik_CCDS51906.1_ex2_6:124356872-124356894:-_5-3	CAGCACACCAAGAAATGTA	1700013D24Rik	0.0531782	0.208371	0.793346	10.8086	6.2366
1700013D24Rik_CCDS51906.1_ex2_6:124356892-124356914:+_5-4	GGTCTATCTCGAGCAAAAA	1700013D24Rik	0.0054046	0.0577791	1.40865	9.98286	3.76018
1700013D24Rik_CCDS51906.1_ex2_6:124356911-124356933:+_5-5	AGGCGAGAACATGACAAAA	1700013D24Rik	0.239177	0.425669	-0.63942	4.15276	6.46877
1700013F07Rik_CCDS51046.1_ex1_3:108542506-108542528:-_5-1	GCTGTTGCGCAAGGTGAGC	1700013F07Rik	0.0187352	0.117173	-0.770807	11.8345	20.1923
1700013F07Rik_CCDS51046.1_ex2_3:108543426-108543448:+_5-2	ATTCCTCTCTAGATACCAA	1700013F07Rik	0.0949912	0.272139	1.12764	5.2287	2.39299
1700013F07Rik_CCDS51046.1_ex2_3:108543462-108543484:-_5-3	GTTATACAAGGTTGCTAAG	1700013F07Rik	0.46384	0.535746	-0.252799	3.50219	4.17292
1700013F07Rik_CCDS51046.1_ex2_3:108543510-108543532:+_5-4	ACTGAGATATTGTTACACC	1700013F07Rik	0.0693904	0.240861	-0.964773	3.55223	6.93309
1700013F07Rik_CCDS51046.1_ex2_3:108543536-108543558:-_5-5	TACCCCTGGATATCCTCAA	1700013F07Rik	0.24575	0.430654	0.376309	8.83185	6.80411
1700013G24Rik_CCDS18818.1_ex0_4:137454635-137454657:+_5-1	CCAATATGAACAACGGCAA	1700013G24Rik	0.467458	0.537344	-0.142423	8.4315	9.30633
1700013G24Rik_CCDS18818.1_ex0_4:137454659-137454681:+_5-2	TGCGAAGCCGCCTTCCAAG	1700013G24Rik	0.41574	0.516131	-0.105229	17.7647	19.1088
1700013G24Rik_CCDS18818.1_ex0_4:137454699-137454721:-_5-3	GAGTGGCCAGATTGGCCGC	1700013G24Rik	0.327117	0.471618	-0.26273	10.2081	12.2471
1700013G24Rik_CCDS18818.1_ex0_4:137454795-137454817:-_5-4	TGACTCGTCTCTACACACT	1700013G24Rik	0.439884	0.526123	0.186384	7.15539	6.28819
1700013G24Rik_CCDS18818.1_ex0_4:137455057-137455079:-_5-5	GGGGCGTTCCGTTTGGTCC	1700013G24Rik	0.0247177	0.136126	-0.819517	9.13212	16.1165
1700013H16Rik_CCDS53071.1_ex6_X:53751023-53751045:-_5-1	TAGAACTGTTTACAGATCC	1700013H16Rik	0.221533	0.411605	-0.841201	2.40123	4.3019
1700013H16Rik_CCDS53071.1_ex6_X:53751057-53751079:-_5-2	TCAACATCTGATTCATGTC	1700013H16Rik	0.359818	0.489689	0.467296	2.95171	2.13503
1700013H16Rik_CCDS53071.1_ex7_X:53751517-53751539:-_5-3	GCATCCCAGGGTTTTGCAG	1700013H16Rik	0.00132426	0.0251343	1.10873	19.7914	9.17735
1700013H16Rik_CCDS53071.1_ex7_X:53751579-53751601:-_5-4	TTTGAAAGCACCCCAACAG	1700013H16Rik	0.524347	0.563457	-0.151113	4.80333	5.33374
1700013H16Rik_CCDS53071.1_ex7_X:53751752-53751774:-_5-5	GCACCACAAGGGACCCTGG	1700013H16Rik	0.0944786	0.271361	0.650704	13.4359	8.55825
1700015E13Rik_CCDS15471.1_ex0_1:170308973-170308995:-_5-1	GAGCGTTTACCTGGCAAGC	1700015E13Rik	0.0430986	0.186147	-0.958875	5.27874	10.2608
1700015E13Rik_CCDS15471.1_ex1_1:170311538-170311560:+_5-2	TTGGGGGACACCCAGAATG	1700015E13Rik	0.406594	0.512661	-0.131358	5.12861	5.6175
1700015E13Rik_CCDS15471.1_ex1_1:170311603-170311625:-_5-3	CATACGAAGTAGCTGTAAG	1700015E13Rik	0.499136	0.549608	-0.417676	1.67559	2.23821
1700015E13Rik_CCDS15471.1_ex1_1:170311700-170311722:-_5-4	TTCAGCCACGTCCTCAAGA	1700015E13Rik	0.285994	0.444803	-0.14308	33.3533	36.8307
1700015E13Rik_CCDS15471.1_ex1_1:170311841-170311863:-_5-5	GTAGCCATTCTGCTGGGCT	1700015E13Rik	0.328772	0.472526	-0.129671	24.4455	26.7445
1700015F17Rik_CCDS51410.1_ex3_5:5457354-5457376:-_5-1	ATTTGGTGCCGAGAAGAAA	1700015F17Rik	0.126158	0.313655	0.841254	4.70324	2.62515
1700015F17Rik_CCDS51410.1_ex4_5:5466626-5466648:+_5-2	TCTTATCTCGAGTACACAC	1700015F17Rik	0.414377	0.51595	0.180255	8.03115	7.08787
1700015F17Rik_CCDS51410.1_ex4_5:5466657-5466679:-_5-3	CTTGTAGAATGTGCTCAAA	1700015F17Rik	0.264379	0.430654	-0.338069	5.17866	6.54615
1700015F17Rik_CCDS51410.1_ex5_5:5478866-5478888:-_5-4	GAAGCAAAATACGTTGAAA	1700015F17Rik	0.632121	0.63387	0	1	1
1700015F17Rik_CCDS51410.1_ex5_5:5478887-5478909:+_5-5	GATTTTCCGCTTCCAGTGA	1700015F17Rik	0.209247	0.400698	-0.35	12.6852	16.1681
1700015G11Rik_CCDS57552.1_ex1_7:52013536-52013558:-_4-1	AAACCTACAGAAAGAGAAG	1700015G11Rik	0.401255	0.510516	0.278072	2.77655	2.2898
1700015G11Rik_CCDS57552.1_ex1_7:52013580-52013602:-_4-2	TCAATTTTCCTTAAGTCTG	1700015G11Rik	0.400919	0.51043	0.113872	13.8112	12.763
1700015G11Rik_CCDS57552.1_ex2_7:52014841-52014863:+_4-3	GAAATAAAATTTACCTGCC	1700015G11Rik	0.00125132	0.0242654	-1.55725	4.15276	12.2213
1700015G11Rik_CCDS57552.1_ex2_7:52014855-52014877:-_4-4	TCAGATGTTTCTACCAGGC	1700015G11Rik	0.429993	0.522359	-0.108889	9.13212	9.84805
1700016C15Rik_CCDS48462.1_ex1_1:177741020-177741042:+_5-1	ACATCAAAGGCTATTACCC	1700016C15Rik	0.0189882	0.117173	-1.8808	1	3.68279
1700016C15Rik_CCDS48462.1_ex1_1:177741058-177741080:-_5-2	CCTCCCACTGTAATCAAAA	1700016C15Rik	0.234677	0.422147	-0.499107	4.97848	7.03628
1700016C15Rik_CCDS48462.1_ex2_1:177743256-177743278:-_5-3	GGAATTGTCAAGTCTATAA	1700016C15Rik	0.355443	0.487784	-0.736783	1.25022	2.08343
1700016C15Rik_CCDS48462.1_ex2_1:177743276-177743298:-_5-4	ACGGAGTTGTGCTCTTGAG	1700016C15Rik	1.54e-05	0.0013643	2.14528	13.2107	2.9863
1700016C15Rik_CCDS48462.1_ex2_1:177743294-177743316:-_5-5	GGTCTAATTGAGGCTGATA	1700016C15Rik	0.00117675	0.0233462	-1.72827	3.02677	10.0286
1700016D06Rik_CCDS40221.1_ex2_8:11661658-11661680:+_5-1	GGGTTATATTTACCGTCAA	1700016D06Rik	0.00277082	0.0398278	-1.69895	2.32616	7.5522
1700016D06Rik_CCDS40221.1_ex3_8:11662656-11662678:+_5-2	CCCTGGCTCCAGAATATCC	1700016D06Rik	0.0238277	0.13339	0.649528	21.518	13.7175
1700016D06Rik_CCDS40221.1_ex3_8:11662675-11662697:-_5-3	CCAAGATGAAATTCTAGTC	1700016D06Rik	0.0094942	0.0812156	-1.32098	3.47717	8.68723
1700016D06Rik_CCDS40221.1_ex4_8:11665030-11665052:-_5-4	ATAGCTACAGTGTTTGGTA	1700016D06Rik	0.00338435	0.0450493	1.21467	15.3125	6.59775
1700016D06Rik_CCDS40221.1_ex4_8:11665060-11665082:-_5-5	TGGCCAAATTTAGAAACTC	1700016D06Rik	0.000451556	0.0130297	1.64392	11.5092	3.68279
1700016H13Rik_CCDS51575.1_ex0_5:103648932-103648954:+_5-1	TACTCCTTTTCAAGTGCCA	1700016H13Rik	0.0711705	0.243801	0.962229	8.38146	4.3019
1700016H13Rik_CCDS51575.1_ex1_5:103649412-103649434:+_5-2	TTAACTCACATTGCATTGA	1700016H13Rik	0.00853624	0.0761694	1.08303	14.0865	6.64934
1700016H13Rik_CCDS51575.1_ex1_5:103649487-103649509:+_5-3	ATACGATTTCTCCCAAGAA	1700016H13Rik	0.514071	0.557246	-0.16312	5.75416	6.44297
1700016H13Rik_CCDS51575.1_ex1_5:103649519-103649541:+_5-4	TTCGTCAAGTTTGTGTACC	1700016H13Rik	0.10577	0.28657	0.565304	11.7094	7.91334
1700016H13Rik_CCDS51575.1_ex1_5:103649537-103649559:-_5-5	TGCGGAACTCACAAAGACC	1700016H13Rik	0.15649	0.349083	-0.91608	2.8266	5.33374
1700016K19Rik_CCDS25059.1_ex0_11:76000173-76000195:-_5-1	AGGCGGTGCCCACGATGGG	1700016K19Rik	0.0517062	0.205346	-0.746402	7.73089	12.9694
1700016K19Rik_CCDS25059.1_ex0_11:76000245-76000267:+_5-2	AAGGATCGGGCAAGGGCGA	1700016K19Rik	0.357988	0.48903	-0.117405	21.9433	23.8037
1700016K19Rik_CCDS25059.1_ex1_11:76003003-76003025:+_5-3	CAGATAAACATCACAGTCG	1700016K19Rik	0.0135751	0.100023	0.914718	15.9881	8.48086
1700016K19Rik_CCDS25059.1_ex1_11:76003135-76003157:-_5-4	GATTAATGCTGTACGAATA	1700016K19Rik	0.39988	0.509622	0.150513	4.60315	4.14712
1700016K19Rik_CCDS25059.1_ex1_11:76003190-76003212:-_5-5	AGACTCTCGTTGATCTGGC	1700016K19Rik	0.38776	0.503882	-0.122011	17.4644	19.0057
1700017B05Rik_CCDS23219.1_ex1_9:57257582-57257604:+_5-1	CGTTGTCAATCACGGGCAT	1700017B05Rik	0.00106433	0.0218135	-1.18623	7.70587	17.5353
1700017B05Rik_CCDS23219.1_ex1_9:57257719-57257741:+_5-2	CCAGGACGCTCGTTTGGCC	1700017B05Rik	0.0541944	0.210649	0.424278	36.1307	26.925
1700017B05Rik_CCDS23219.1_ex1_9:57258506-57258528:-_5-3	TCTTGCGAGGACTACCATC	1700017B05Rik	0.000235697	0.00843928	1.4272	16.5636	6.15921
1700017B05Rik_CCDS23219.1_ex1_9:57258680-57258702:+_5-4	ACAAAGGGTTGCGGTAGAC	1700017B05Rik	0.0302607	0.152631	0.864267	14.3116	7.86175
1700017B05Rik_CCDS23219.1_ex1_9:57258916-57258938:+_5-5	GCCTTCGAAGTACCCCCTA	1700017B05Rik	0.414086	0.515843	0.078281	10.5333	9.97703
1700017D01Rik_CCDS50393.1_ex2_19:11105696-11105718:+_5-1	TTCCTATTGATTCAAAAAT	1700017D01Rik	0.474913	0.539924	0.148017	2.85162	2.57356
1700017D01Rik_CCDS50393.1_ex2_19:11105754-11105776:-_5-2	AACATCATAAGTATCTTCG	1700017D01Rik	0.559325	0.587936	-0.221222	1.87577	2.18662
1700017D01Rik_CCDS50393.1_ex3_19:11110328-11110350:-_5-3	GGATCCAGCAGTATAACTC	1700017D01Rik	0.378328	0.499515	-0.242431	5.90429	6.98469
1700017D01Rik_CCDS50393.1_ex3_19:11110345-11110367:+_5-4	ATCCTGAGTTGATGAACTG	1700017D01Rik	0.00424214	0.0499459	-0.69365	23.7449	38.4043
1700017D01Rik_CCDS50393.1_ex4_19:11112420-11112442:-_5-5	GGCCTAATTCACAATGCAC	1700017D01Rik	0.549741	0.580547	0.152992	4.35293	3.91496
1700017N19Rik_CCDS36047.1_ex2_10:100601933-100601955:-_5-1	GGTCTTGATACGTTCTCCA	1700017N19Rik	0.106317	0.287318	0.464964	19.0408	13.7948
1700017N19Rik_CCDS36047.1_ex2_10:100601954-100601976:-_5-2	AAAACTAATGGATGATGAA	1700017N19Rik	0.488183	0.545044	-0.393759	2.62642	3.45063
1700017N19Rik_CCDS36047.1_ex4_10:100603544-100603566:+_5-3	AAAAGCGTAGCTCCGACAG	1700017N19Rik	0.126577	0.313971	-0.707404	3.37708	5.51431
1700017N19Rik_CCDS36047.1_ex5_10:100605641-100605663:+_5-4	TTAGCCTATTTGAAAGGGC	1700017N19Rik	0.336479	0.477252	-0.423124	4.72826	6.33978
1700017N19Rik_CCDS36047.1_ex6_10:100609233-100609255:+_5-5	CAAAATGCTCAAATGTCAA	1700017N19Rik	0.231969	0.419724	0.485445	4.57813	3.27005
1700018B08Rik_CCDS52692.1_ex3_8:121535453-121535475:-_5-1	CAGGGCTGTCATGCCCTAC	1700018B08Rik	0.43012	0.522359	-0.139712	4.30289	4.74043
1700018B08Rik_CCDS52692.1_ex3_8:121535471-121535493:-_5-2	CCTTCCGATGCCCAGGGAC	1700018B08Rik	0.386939	0.503587	-0.122162	23.2695	25.3257
1700018B08Rik_CCDS52692.1_ex3_8:121535519-121535541:+_5-3	CGGCAGGACTTCATGGCTC	1700018B08Rik	0.366788	0.493455	-0.402161	3.97761	5.25635
1700018B08Rik_CCDS52692.1_ex4_8:121539883-121539905:+_5-4	GGGACAAAGGCACCCAGTA	1700018B08Rik	0.55487	0.584465	0.184398	4.47804	3.94075
1700018B08Rik_CCDS52692.1_ex4_8:121539910-121539932:+_5-5	GTGCATCAGCCCGGGGCAC	1700018B08Rik	0.000147788	0.00612254	1.13888	28.0487	12.7372
1700018C11Rik_CCDS18262.1_ex1_4:63608456-63608478:-_5-1	CTGCCAGCAGTGATTATGA	1700018C11Rik	5.79e-11	9.32e-08	-1.96016	8.6567	33.6836
1700018C11Rik_CCDS18262.1_ex1_4:63608482-63608504:+_5-2	TGCTTTTCTTGGCCAACGA	1700018C11Rik	0.00518277	0.0563831	-0.892322	12.5601	23.3136
1700018C11Rik_CCDS18262.1_ex1_4:63608495-63608517:-_5-3	CTACCGCACAGTCCGTCGT	1700018C11Rik	0.340794	0.479564	-0.167973	12.2098	13.7175
1700018C11Rik_CCDS18262.1_ex2_4:63611857-63611879:+_5-4	CCTACTGTAGGTTGGTGTC	1700018C11Rik	0.15913	0.352136	-0.400968	14.687	19.3926
1700018C11Rik_CCDS18262.1_ex2_4:63611879-63611901:+_5-5	CTCTCTTGGCTTGGAACCT	1700018C11Rik	0.000701886	0.0166224	0.857282	37.2817	20.5792
1700018F24Rik_CCDS51696.1_ex1_5:145043378-145043400:-_5-1	GTAGGTTATACGGAAAGTC	1700018F24Rik	0.00968755	0.0822921	1.53385	6.70499	2.3156
Gm4871_CCDS51695.1_ex3_5:145032344-145032366:+_5-5	GTAGGTTATACGGAAAGTC	Gm4871	0.00968755	0.0822921	1.53385	6.70499	2.3156
1700018F24Rik_CCDS51696.1_ex1_5:145043453-145043475:-_5-2	CGTGGTAATGAACTGCAGC	1700018F24Rik	0.252568	0.430654	-0.210976	18.7155	21.6626
Gm4871_CCDS51695.1_ex3_5:145032269-145032291:+_5-4	CGTGGTAATGAACTGCAGC	Gm4871	0.252568	0.430654	-0.210976	18.7155	21.6626
1700018F24Rik_CCDS51696.1_ex1_5:145043470-145043492:-_5-3	GCTGATGGATAGTTGGTCG	1700018F24Rik	0.111949	0.295398	-0.411698	19.1159	25.4289
Gm4871_CCDS51695.1_ex3_5:145032252-145032274:+_5-3	GCTGATGGATAGTTGGTCG	Gm4871	0.111949	0.295398	-0.411698	19.1159	25.4289
1700018F24Rik_CCDS51696.1_ex1_5:145043497-145043519:-_5-4	GTACCTATGGTAGACAGCC	1700018F24Rik	0.523898	0.563222	0.0274269	20.3169	19.9343
Gm4871_CCDS51695.1_ex3_5:145032225-145032247:+_5-2	GTACCTATGGTAGACAGCC	Gm4871	0.523898	0.563222	0.0274269	20.3169	19.9343
Gm4871_CCDS51695.1_ex1_5:145030459-145030481:-_5-1	GGCAGTTGATGGACTACGC	Gm4871	0.15474	0.34738	0.247112	44.2629	37.2951
1700018F24Rik_CCDS51696.1_ex3_5:145044798-145044820:+_5-5	GGCAGTTGATGGACTACGC	1700018F24Rik	0.15474	0.34738	0.247112	44.2629	37.2951
1700019A02Rik_CCDS48258.1_ex4_1:53177769-53177791:-_5-1	GCATCAATGACAGATGAAG	1700019A02Rik	0.192255	0.385147	-0.43244	8.0812	10.9057
1700019A02Rik_CCDS48258.1_ex4_1:53177782-53177804:+_5-2	ATTGATGCAATACTCCTGA	1700019A02Rik	0.0623217	0.227433	0.768771	10.9337	6.41717
1700019A02Rik_CCDS48258.1_ex4_1:53177797-53177819:-_5-3	ATCTCATAAAGTATCCCTC	1700019A02Rik	0.09186	0.26743	-0.875098	3.07682	5.64329
1700019A02Rik_CCDS48258.1_ex5_1:53181864-53181886:-_5-4	CTGAAGCTCTGAATGAAGA	1700019A02Rik	0.501676	0.550841	-0.12972	7.68085	8.40347
1700019A02Rik_CCDS48258.1_ex6_1:53182518-53182540:-_5-5	GAAGCCTATTTAGAAGAAC	1700019A02Rik	0.296492	0.452099	-0.748163	1.90079	3.19267
1700019B03Rik_CCDS52467.1_ex0_8:3476092-3476114:-_5-1	CATCTTGCGACTGTAACGT	1700019B03Rik	0.188259	0.381836	-0.522239	7.18041	10.3124
1700019B03Rik_CCDS52467.1_ex0_8:3476170-3476192:+_5-2	TGCACGCGGATATGCGTCC	1700019B03Rik	0.223545	0.413238	-0.217889	29.4499	34.2511
1700019B03Rik_CCDS52467.1_ex0_8:3476203-3476225:+_5-3	CCATTGCACGTACTGACTA	1700019B03Rik	0.178385	0.371982	0.362966	13.561	10.5445
1700019B03Rik_CCDS52467.1_ex0_8:3476285-3476307:+_5-4	CCGGGATTCAATGCCCTCG	1700019B03Rik	0.369663	0.495242	-0.0953346	24.0201	25.661
1700019B03Rik_CCDS52467.1_ex0_8:3476336-3476358:-_5-5	GGATAGTGTGCCTGGTACG	1700019B03Rik	0.305069	0.457241	0.170522	23.9451	21.2757
1700019D03Rik_CCDS14949.1_ex0_1:52925331-52925353:+_5-1	GCATCCTCCACAATTTCAC	1700019D03Rik	0.32461	0.469866	0.269929	11.1589	9.25474
1700019D03Rik_CCDS14949.1_ex0_1:52925361-52925383:+_5-2	TCTGCGAATTCAAGGATCA	1700019D03Rik	0.00172532	0.029692	1.27201	14.8121	6.13342
1700019D03Rik_CCDS14949.1_ex0_1:52925386-52925408:+_5-3	CGATCACAGCACCGGGCTC	1700019D03Rik	0.016943	0.113857	-0.589166	22.8191	34.3285
1700019D03Rik_CCDS14949.1_ex0_1:52925405-52925427:+_5-4	TGGGAGTTTCTTTACTTCC	1700019D03Rik	0.215188	0.405836	0.454909	7.80596	5.69488
1700019D03Rik_CCDS14949.1_ex0_1:52925443-52925465:-_5-5	AATATAGGACACCTTCTCC	1700019D03Rik	0.0803014	0.250219	-1.43432	1	2.70254
1700019G17Rik_CCDS39540.1_ex0_6:85901281-85901303:-_5-1	CTTTCTTGGAGAAATTACG	1700019G17Rik	0.001994	0.0325586	-1.31302	5.60403	13.9238
1700019G17Rik_CCDS39540.1_ex0_6:85901299-85901321:+_5-2	AAGCCAGATAAGGAGCCGC	1700019G17Rik	0.317022	0.464939	-0.167839	16.6887	18.7477
1700019G17Rik_CCDS39540.1_ex0_6:85901335-85901357:+_5-3	AAAGCTGCATACTGTGGCC	1700019G17Rik	0.0282274	0.146915	0.591544	27.1229	17.9996
1700019G17Rik_CCDS39540.1_ex0_6:85901370-85901392:+_5-4	ACACTAGGACTATGGTCAC	1700019G17Rik	0.000717469	0.0168894	1.20036	18.5403	8.06812
1700019L03Rik_CCDS15932.1_ex5_2:32779871-32779893:+_5-1	TTCTCTAGGATGGCCCGCC	1700019L03Rik	0.105534	0.28643	0.364373	28.9495	22.4881
1700019L03Rik_CCDS15932.1_ex7_2:32781348-32781370:-_5-2	GAGAACATCGCCCTCGGTG	1700019L03Rik	0.171896	0.365384	0.260775	29.7251	24.8098
1700019L03Rik_CCDS15932.1_ex7_2:32781394-32781416:+_5-3	TGGAATTCATGGCGCACCT	1700019L03Rik	0.221539	0.411605	0.245446	29.3498	24.7582
1700019L03Rik_CCDS15932.1_ex7_2:32781417-32781439:-_5-4	GACGCGTTCGAGGCCCAAC	1700019L03Rik	0.222281	0.412395	0.308	17.014	13.7433
1700019L03Rik_CCDS15932.1_ex7_2:32781607-32781629:+_5-5	TCCCATTTCCGCTGATACC	1700019L03Rik	0.231857	0.419724	-0.366944	8.45653	10.9057
1700019N19Rik_CCDS38031.1_ex2_19:58787608-58787630:-_5-1	GCCACAAGGTATACCATCA	1700019N19Rik	0.0496568	0.200874	0.713171	13.8613	8.45506
1700019N19Rik_CCDS38031.1_ex3_19:58789068-58789090:+_5-2	AGGGCCATACCCAGAGTCA	1700019N19Rik	0.144543	0.335844	0.596612	11.4592	7.578
1700019N19Rik_CCDS38031.1_ex3_19:58789175-58789197:+_5-3	AGAGCAGTTTAATCCCTGC	1700019N19Rik	0.00272322	0.0394534	-1.52505	3.97761	11.4474
1700019N19Rik_CCDS38031.1_ex3_19:58789199-58789221:-_5-4	AGAACGCAGAGATACAAGG	1700019N19Rik	0.0803014	0.250219	-1.76512	1	3.39903
1700019N19Rik_CCDS38031.1_ex3_19:58789221-58789243:+_5-5	TCCTGGAACGCTTTCACAC	1700019N19Rik	0.536603	0.571382	0.0226007	17.3143	17.0452
1700019O17Rik_CCDS56635.1_ex0_1:86426470-86426492:+_5-1	ATTTACCCGGAGAGTCCGA	1700019O17Rik	0.369581	0.495194	0.13666	23.2194	21.1209
1700019O17Rik_CCDS56635.1_ex0_1:86426502-86426524:-_5-2	TGGTGGGACGTCATCGGGC	1700019O17Rik	0.406758	0.512665	0.0644674	23.5698	22.5397
1700019O17Rik_CCDS56635.1_ex0_1:86426567-86426589:-_5-3	GTGATGGCTTTCGCCTCAG	1700019O17Rik	0.418757	0.517362	0.146887	15.3876	13.898
1700019O17Rik_CCDS56635.1_ex0_1:86427140-86427162:+_5-4	CAACCGTACAAGTCGGAGC	1700019O17Rik	0.027668	0.145533	0.777376	17.1892	10.0286
1700019O17Rik_CCDS56635.1_ex0_1:86427159-86427181:-_5-5	GTCACTCGGGGAAACCGTC	1700019O17Rik	0.457078	0.533244	-0.11477	8.35644	9.04837
1700020A23Rik_CCDS50710.1_ex0_2:130405620-130405642:+_5-1	ATTCGAACCATCTTCTCAA	1700020A23Rik	0.144436	0.335844	0.744112	7.20543	4.3019
1700020A23Rik_CCDS50710.1_ex0_2:130405692-130405714:-_5-2	TGGCACTTACCCATAGAGC	1700020A23Rik	0.00302614	0.042096	-1.10592	8.50657	18.3092
1700020A23Rik_CCDS50710.1_ex1_2:130405802-130405824:+_5-3	CGACACAGACTTCTCCCAA	1700020A23Rik	0.0785526	0.250219	0.760814	8.73177	5.15317
1700020A23Rik_CCDS50710.1_ex1_2:130405814-130405836:+_5-4	CTCCCAATGGGTCAGAGCC	1700020A23Rik	0.444611	0.528233	-0.138961	13.1606	14.4913
1700020A23Rik_CCDS50710.1_ex1_2:130405871-130405893:-_5-5	GGCCATCTTTGTTGGAGAG	1700020A23Rik	0.0167016	0.112807	-1.11181	5.15363	11.1379
1700020L24Rik_CCDS25165.1_ex1_11:83440374-83440396:+_5-1	TTCGTCGTCGGTGGAAGAG	1700020L24Rik	0.238596	0.425346	-0.312182	13.9363	17.3031
1700020L24Rik_CCDS25165.1_ex1_11:83440434-83440456:-_5-2	TCGCGCTCTTCCGCGTCTC	1700020L24Rik	0.208135	0.399712	0.265982	23.9701	19.9343
1700020L24Rik_CCDS25165.1_ex1_11:83440478-83440500:-_5-3	TGCTGGACTCCTGGCGCAG	1700020L24Rik	0.0642766	0.231266	-0.377921	28.2238	36.676
1700020L24Rik_CCDS25165.1_ex1_11:83440553-83440575:+_5-4	GCCCGTTCGCTCTGCTGGG	1700020L24Rik	0.25465	0.430654	-0.233217	17.8147	20.9404
1700020L24Rik_CCDS25165.1_ex2_11:83440687-83440709:-_5-5	AACACGCACGGTTCCTCCG	1700020L24Rik	0.502483	0.55104	0.0877794	9.2322	8.68723
1700020N15Rik_CCDS57758.1_ex1_X:69945617-69945639:-_5-2	TGAATATGTTCATAAACAC	1700020N15Rik	0.258905	0.430654	0.386929	9.03203	6.9073
Gm6812_CCDS40994.1_ex0_X:68892714-68892736:+_5-4	TGAATATGTTCATAAACAC	Gm6812	0.258905	0.430654	0.386929	9.03203	6.9073
1700020N15Rik_CCDS57758.1_ex1_X:69945664-69945686:-_5-3	GGGAGTCTGAGCTCTTGGG	1700020N15Rik	0.00822433	0.0745361	1.41961	7.50569	2.80572
Gm6812_CCDS40994.1_ex0_X:68892648-68892670:+_5-2	CTTTCTTCACCTTAACCAA	Gm6812	0.447751	0.529662	-0.0766924	16.1382	17.0194
1700020N15Rik_CCDS57758.1_ex1_X:69945683-69945705:-_5-4	CTTTCTTCACCTTAACCAA	1700020N15Rik	0.447751	0.529662	-0.0766924	16.1382	17.0194
Gm6812_CCDS40994.1_ex0_X:68892604-68892626:+_5-1	CTCATTTACGCGATGGTAA	Gm6812	2.64e-05	0.00196014	-1.33205	10.8586	27.3378
1700020N15Rik_CCDS57758.1_ex1_X:69945727-69945749:-_5-5	CTCATTTACGCGATGGTAA	1700020N15Rik	2.64e-05	0.00196014	-1.33205	10.8586	27.3378
1700021F05Rik_CCDS23820.1_ex1_10:43530644-43530666:-_5-1	TAGAAGATGCATTCTACAA	1700021F05Rik	0.632121	0.63387	0	1	1
1700021F05Rik_CCDS23820.1_ex2_10:43532755-43532777:-_5-3	AGTGAGCCTGGTGTGGCGA	1700021F05Rik	0.000209349	0.00777667	-1.37748	7.88102	20.476
1700021F05Rik_CCDS23820.1_ex2_10:43532795-43532817:+_5-4	TCGCTCCTCTCGGGGTAAC	1700021F05Rik	0.120023	0.30594	0.439828	15.5627	11.4732
1700021F05Rik_CCDS23820.1_ex2_10:43532892-43532914:+_5-5	TTTTGAGTCGTATAGAAAA	1700021F05Rik	0.474595	0.53984	-0.0317194	3.55223	3.6312
1700021F07Rik_CCDS50814.1_ex1_2:173526015-173526037:+_5-1	GAGGGCCGAAAGTGAAGCC	1700021F07Rik	0.0295672	0.150837	0.809796	13.7361	7.83596
1700021F07Rik_CCDS50814.1_ex1_2:173526036-173526058:+_5-2	GCAAAACTGGCCGGCCAAG	1700021F07Rik	0.269297	0.434107	-0.175064	23.6198	26.6671
1700021F07Rik_CCDS50814.1_ex1_2:173526064-173526086:+_5-3	TTAACAACGTCCATGAAAG	1700021F07Rik	0.512999	0.556928	0.0449238	3.8525	3.73438
1700021F07Rik_CCDS50814.1_ex2_2:173527841-173527863:+_5-4	CAGCTGCTTGAGGGTGAAG	1700021F07Rik	0.0554326	0.213055	0.604176	19.1659	12.6082
1700021F07Rik_CCDS50814.1_ex2_2:173527896-173527918:-_5-5	GACGGACATAGAAGTGGCT	1700021F07Rik	0.248091	0.430654	-0.344819	11.309	14.3624
1700021K19Rik_CCDS28124.1_ex12_16:32843025-32843047:+_5-1	GTCCGAGTGGGAGCGAATA	1700021K19Rik	0.000415721	0.0122864	-1.37334	6.4798	16.7872
1700021K19Rik_CCDS28124.1_ex12_16:32843051-32843073:+_5-2	TCTTTGTCCCGCTGGCGAC	1700021K19Rik	0.205333	0.397014	-0.321605	13.536	16.9162
1700021K19Rik_CCDS28124.1_ex12_16:32843276-32843298:-_5-3	GGCCCGAGTACCTGGCCAT	1700021K19Rik	0.0680481	0.238302	0.403203	31.7519	24.0101
1700021K19Rik_CCDS28124.1_ex12_16:32843346-32843368:-_5-4	ACTCTGACTAGCCCCCTAG	1700021K19Rik	0.159617	0.352971	-0.346541	13.8112	17.5611
1700021K19Rik_CCDS28124.1_ex17_16:32857002-32857024:-_5-5	GGTAATTTGAAGACGACTG	1700021K19Rik	0.391221	0.505418	-0.284884	4.10272	4.99839
1700022I11Rik_CCDS51160.1_ex0_4:42970121-42970143:+_5-1	GGTTTGGCAGATCCGAAGA	1700022I11Rik	0.501503	0.550841	-0.0363156	5.67909	5.82386
1700022I11Rik_CCDS51160.1_ex1_4:42971318-42971340:-_5-2	AGGTTGTACGCAGGTGGAA	1700022I11Rik	0.20916	0.400665	-0.27641	20.8674	25.2741
1700022I11Rik_CCDS51160.1_ex1_4:42971420-42971442:-_5-3	GATTGGACTAGTTGAGAAC	1700022I11Rik	0.099189	0.277887	-0.97412	2.42625	4.76623
1700022I11Rik_CCDS51160.1_ex1_4:42971452-42971474:-_5-4	AGGATACCAGTGGTATAGG	1700022I11Rik	0.231857	0.419724	-0.328909	8.45653	10.6219
1700022I11Rik_CCDS51160.1_ex1_4:42971965-42971987:+_5-5	TCACAGTACCCGTGACTGA	1700022I11Rik	0.0570462	0.216765	-0.438751	23.5948	31.9811
1700022P22Rik_CCDS48483.1_ex0_1:191039663-191039685:+_5-1	CGCGAGTCCTACTGCCTGG	1700022P22Rik	0.300894	0.45474	-0.181765	22.1685	25.1451
1700022P22Rik_CCDS48483.1_ex0_1:191039678-191039700:-_5-2	TTCGTTGCTTCTTTCCACC	1700022P22Rik	0.181005	0.374847	0.512259	8.93194	6.2624
1700022P22Rik_CCDS48483.1_ex0_1:191039704-191039726:+_5-3	CCTGCTGAGAGTTCAGAAG	1700022P22Rik	0.0538259	0.209838	-0.687468	7.78093	12.5308
1700022P22Rik_CCDS48483.1_ex0_1:191039717-191039739:+_5-4	CAGAAGAGGCACTTCAGCA	1700022P22Rik	0.0222969	0.128586	-1.03563	4.70324	9.64168
1700022P22Rik_CCDS48483.1_ex0_1:191039744-191039766:-_5-5	ATGCATGCAAGCTAAGGTC	1700022P22Rik	0.488808	0.545104	0.166645	7.40561	6.59775
1700023E05Rik_CCDS19369.1_ex0_5:77016430-77016452:+_5-1	GATTCCCTCCGGTCTCGCA	1700023E05Rik	0.00156665	0.0280807	0.797827	34.8796	20.0633
1700023E05Rik_CCDS19369.1_ex0_5:77016515-77016537:-_5-2	GGCGCTCGGATGACTGAAG	1700023E05Rik	0.439294	0.526123	-0.20748	7.25547	8.37767
1700023E05Rik_CCDS19369.1_ex0_5:77016582-77016604:-_5-3	CTGGCTATCAAAGATGGGG	1700023E05Rik	0.0589393	0.220859	-0.718445	8.68172	14.285
1700023E05Rik_CCDS19369.1_ex0_5:77016604-77016626:+_5-4	TACCTACCACGGCTCCAGC	1700023E05Rik	0.0248141	0.136565	-0.741421	10.6585	17.819
1700023E05Rik_CCDS19369.1_ex2_5:77044060-77044082:+_5-5	GCAATGGGGAACTCCGGAC	1700023E05Rik	6.21e-06	0.000748276	-2.40852	2.32616	12.3503
1700023F06Rik_CCDS56813.1_ex3_11:103200147-103200169:-_5-1	ATCGGGTCGGTGAGCCCCC	1700023F06Rik	0.00784226	0.0724191	-1.09472	6.57988	14.0528
1700023F06Rik_CCDS56813.1_ex3_11:103200172-103200194:-_5-2	CCCTACTCAGGCCAAATGA	1700023F06Rik	0.228562	0.417276	-0.319341	10.2081	12.7372
1700023F06Rik_CCDS56813.1_ex4_11:103200280-103200302:+_5-3	CAGACGGTGGTTGTCAGTA	1700023F06Rik	0.501012	0.550699	0.0372654	16.0882	15.678
1700023F06Rik_CCDS56813.1_ex5_11:103200803-103200825:-_5-4	ATGTGCGAGGCTCTTCGGC	1700023F06Rik	0.425807	0.520328	0.0702454	19.7914	18.8509
1700023F06Rik_CCDS56813.1_ex5_11:103200840-103200862:+_5-5	TGGATACCCGCGTTGCGCA	1700023F06Rik	0.155037	0.347787	0.438764	17.4394	12.8662
1700024G13Rik_CCDS36867.1_ex1_14:32377919-32377941:-_5-1	CCTGGAGCAGATAGAAGAC	1700024G13Rik	0.472905	0.539153	0.432986	2.15101	1.59331
1700024G13Rik_CCDS36867.1_ex1_14:32377936-32377958:-_5-2	GACGGACATCAGATCATCC	1700024G13Rik	0.43077	0.522467	-0.0537185	14.0114	14.5429
1700024G13Rik_CCDS36867.1_ex1_14:32377953-32377975:-_5-3	CAGCTGTGTTGGCCAAAGA	1700024G13Rik	0.412554	0.5152	0.162505	12.2348	10.9315
1700024G13Rik_CCDS36867.1_ex2_14:32388251-32388273:-_5-4	ACTGCAGGGTCTGCAAGGT	1700024G13Rik	0.497852	0.548971	0.00162035	18.6655	18.6445
1700024G13Rik_CCDS36867.1_ex2_14:32388264-32388286:-_5-5	ACCGCACCTACCGACTGCA	1700024G13Rik	0.447323	0.529524	0.0682354	24.1453	23.0298
1700024P04Rik_CCDS49342.1_ex0_13:98984294-98984316:-_5-1	ATCTTCGAACGCATTGCTA	1700024P04Rik	0.219646	0.410111	-0.512248	5.72914	8.17131
1700024P04Rik_CCDS49342.1_ex0_13:98984331-98984353:+_5-2	TTCATGATGTCCACAGAAT	1700024P04Rik	0.00038932	0.0117801	1.41167	15.5627	5.84966
1700024P04Rik_CCDS49342.1_ex0_13:98984363-98984385:-_5-3	AAGGAAGTTGTCCCTAACA	1700024P04Rik	0.000677444	0.0162266	2.49412	5.77918	1.0258
1700024P04Rik_CCDS49342.1_ex0_13:98984399-98984421:+_5-4	GTAAAGGGAGTAATTTCCA	1700024P04Rik	0.269759	0.4343	-0.566359	2.62642	3.88916
1700024P04Rik_CCDS49342.1_ex0_13:98984416-98984438:-_5-5	CTAGCATCAATTTGGGCCA	1700024P04Rik	0.278011	0.439763	0.161599	37.1566	33.2193
1700024P16Rik_CCDS51250.1_ex0_4:104913656-104913678:-_5-1	GTCCTCCTAGGCAGCGACT	1700024P16Rik	0.322744	0.468691	0.164383	17.7146	15.8069
1700024P16Rik_CCDS51250.1_ex1_4:104945185-104945207:-_5-2	GCTTTCGAGACACGCCAGC	1700024P16Rik	0.30974	0.460132	-0.361624	6.37971	8.1971
1700024P16Rik_CCDS51250.1_ex1_4:104945573-104945595:-_5-3	AAGGTCTTAATCCCGCCAT	1700024P16Rik	0.0905689	0.265403	-0.549136	10.133	14.8267
1700024P16Rik_CCDS51250.1_ex2_4:104948721-104948743:-_5-4	GACCGAGGGTCTCAATGGA	1700024P16Rik	0.139795	0.330264	-0.506165	10.0579	14.285
1700024P16Rik_CCDS51250.1_ex2_4:104948766-104948788:-_5-5	CATAGAGGTTCACGAATGG	1700024P16Rik	0.379797	0.500373	0.241724	8.10622	6.85571
1700025F22Rik_CCDS50394.1_ex1_19:11142327-11142349:+_5-1	CATACTTACATATTGCCAC	1700025F22Rik	0.182388	0.376011	-0.694427	4.60315	7.44902
1700025F22Rik_CCDS50394.1_ex1_19:11142343-11142365:-_5-2	AAGTGTATATTCTACCCTG	1700025F22Rik	0.103264	0.283741	-0.753969	3.92756	6.62354
1700025F22Rik_CCDS50394.1_ex1_19:11142401-11142423:-_5-3	GCATCTTCGCAACACTAGT	1700025F22Rik	0.477338	0.540927	0.103621	14.4618	13.4595
1700025F22Rik_CCDS50394.1_ex1_19:11142445-11142467:-_5-4	TAATCTGTTCTAGCTGATC	1700025F22Rik	0.550477	0.581086	0.00126036	13.1356	13.1241
1700025F22Rik_CCDS50394.1_ex2_19:11146728-11146750:-_5-5	AAGAGGCCTTCAAATCATA	1700025F22Rik	0.0929081	0.269207	-1.19413	2.3762	5.43692
1700025G04Rik_CCDS35737.1_ex2_1:151921054-151921076:+_5-1	GGGTTGATGAACTAATCCA	1700025G04Rik	0.166296	0.359958	-0.963978	2.12599	4.14712
1700025G04Rik_CCDS35737.1_ex2_1:151921071-151921093:-_5-2	AAACTAATAAAGAAATCCC	1700025G04Rik	0.0233153	0.131748	1.63641	4.95346	1.59331
1700025G04Rik_CCDS35737.1_ex2_1:151921091-151921113:+_5-3	TTAAGCCTTGTGTTCGAGC	1700025G04Rik	0.00172036	0.0296803	1.02187	23.2445	11.4474
1700025G04Rik_CCDS35737.1_ex3_1:151980471-151980493:-_5-4	GGTCAAATACATGAAAAAT	1700025G04Rik	0.632121	0.63387	0	1	1
1700025G04Rik_CCDS35737.1_ex3_1:151980497-151980519:-_5-5	GAGTATAGGATCAAACCCG	1700025G04Rik	1.67e-06	0.000287334	2.42176	12.9605	2.41878
1700026D08Rik_CCDS21413.1_ex3_7:83791697-83791719:-_5-1	GGCGCAAACAGCTGCGAAA	1700026D08Rik	0.00233491	0.0358663	-1.00724	11.0338	22.1786
1700026D08Rik_CCDS21413.1_ex4_7:83793196-83793218:+_5-2	GAGCGTCTCTACCTCAAAA	1700026D08Rik	0.410886	0.514227	-0.360407	2.32616	2.9863
1700026D08Rik_CCDS21413.1_ex4_7:83793229-83793251:-_5-3	GACCATCGCCCCGATGGGC	1700026D08Rik	0.469451	0.537642	-0.0559352	11.4091	11.8601
1700026D08Rik_CCDS21413.1_ex4_7:83793390-83793412:+_5-4	GATCACTTTATCGCCATAG	1700026D08Rik	0.0714053	0.244144	0.781703	8.68172	5.04998
1700026D08Rik_CCDS21413.1_ex4_7:83793419-83793441:-_5-5	AGCTTTCGGTATCGGAAGA	1700026D08Rik	0.0691589	0.240535	0.608546	16.0382	10.5187
1700026L06Rik_CCDS15845.1_ex2_2:28693644-28693666:+_5-1	TCATTGCTTTGGCTGACCA	1700026L06Rik	0.309662	0.460132	-0.194978	13.7862	15.7811
1700026L06Rik_CCDS15845.1_ex2_2:28693767-28693789:+_5-2	ATGATCAGAATCCGCCGGT	1700026L06Rik	0.27131	0.435809	0.186794	20.5171	18.0254
1700026L06Rik_CCDS15845.1_ex2_2:28693779-28693801:-_5-3	CAATAACTCCACCCACCGG	1700026L06Rik	0.0838696	0.256005	-0.546838	10.0079	14.6203
1700026L06Rik_CCDS15845.1_ex3_2:28695898-28695920:+_5-4	GGCATCACCTGCTCGATAC	1700026L06Rik	0.46382	0.535746	-0.0542112	13.3358	13.8464
1700026L06Rik_CCDS15845.1_ex3_2:28695928-28695950:-_5-5	GAATGCCCACGACAAAATC	1700026L06Rik	0.130238	0.31856	0.901312	3.60228	1.92866
1700028K03Rik_CCDS19504.1_ex1_5:107543968-107543990:+_5-1	ATTCTGATACACTGGAAAG	1700028K03Rik	0.146004	0.337329	-0.748786	3.52721	5.92705
1700028K03Rik_CCDS19504.1_ex1_5:107543992-107544014:+_5-2	CGATTGTATTTTCTCTGTC	1700028K03Rik	0.135321	0.325381	-0.437596	11.7094	15.8585
1700028K03Rik_CCDS19504.1_ex2_5:107545710-107545732:+_5-3	GCTAAGGAGTGTATGACAT	1700028K03Rik	0.410978	0.514227	0.192665	6.98023	6.10762
1700028K03Rik_CCDS19504.1_ex2_5:107545795-107545817:+_5-4	TTCTATTTGCTCCACTCCA	1700028K03Rik	0.000285376	0.00954745	1.156	23.6698	10.6219
1700028K03Rik_CCDS19504.1_ex2_5:107545807-107545829:-_5-5	ATTCTTCAGGCCCATGGAG	1700028K03Rik	0.272912	0.436796	-0.227849	11.5592	13.5369
1700028P14Rik_CCDS29708.1_ex2_19:23592154-23592176:-_5-1	ACCCTGAATTGCCTCCCAC	1700028P14Rik	0.41489	0.516073	0.125136	17.2392	15.8069
1700028P14Rik_CCDS29708.1_ex3_19:23593026-23593048:-_5-2	ATGCCCCGGGATTTTGGAA	1700028P14Rik	0.012247	0.0940471	0.957003	16.2634	8.37767
1700028P14Rik_CCDS29708.1_ex3_19:23593038-23593060:-_5-3	TGAGGAAACACTATGCCCC	1700028P14Rik	0.164452	0.357693	0.640001	8.23133	5.28215
1700028P14Rik_CCDS29708.1_ex3_19:23593115-23593137:-_5-4	TCGGAAGCACGTGAACAGA	1700028P14Rik	0.437182	0.525165	-0.0628967	5.30377	5.54011
1700028P14Rik_CCDS29708.1_ex4_19:23616575-23616597:-_5-5	GATTATGATATAGAGAGTC	1700028P14Rik	0.085107	0.257398	1.31452	2.55136	1.0258
1700029F12Rik_CCDS36755.1_ex1_13:97030213-97030235:+_5-1	GTGAGTCTCATAGCAGTCG	1700029F12Rik	0.188413	0.381851	0.306757	18.6905	15.1104
1700029F12Rik_CCDS36755.1_ex1_13:97030256-97030278:+_5-2	GCAGCACTGACAATCCACG	1700029F12Rik	0.0116857	0.0917106	-0.965693	8.33142	16.2713
1700029F12Rik_CCDS36755.1_ex1_13:97030305-97030327:+_5-3	AGTCCACGCAGTATAGCAG	1700029F12Rik	0.0683745	0.238986	-0.751444	7.30552	12.2987
1700029F12Rik_CCDS36755.1_ex1_13:97030355-97030377:+_5-4	CATTGGTTCTCCGGGTCAG	1700029F12Rik	0.0574912	0.217402	-0.471142	21.0425	29.1693
1700029F12Rik_CCDS36755.1_ex1_13:97030401-97030423:-_5-5	GACAGCTGTGGAGCTCAAG	1700029F12Rik	0.438516	0.525844	-0.137444	6.27962	6.9073
1700029H14Rik_CCDS40233.1_ex5_8:13558781-13558803:-_5-1	AGCAGGACGATGCCTGCAA	1700029H14Rik	0.422057	0.518852	0.192093	8.15626	7.13946
1700029H14Rik_CCDS40233.1_ex5_8:13558842-13558864:-_5-2	GACCTCAAGTGTGCAAAAA	1700029H14Rik	0.401323	0.51053	-0.0965327	7.95609	8.50665
1700029H14Rik_CCDS40233.1_ex7_8:13562153-13562175:-_5-3	CTACGCAAGGAGCTAGGTA	1700029H14Rik	0.025692	0.139439	1.07972	10.183	4.81782
1700029H14Rik_CCDS40233.1_ex7_8:13562202-13562224:-_5-4	GGGTGGCTTGCACCAGAAG	1700029H14Rik	0.10398	0.284651	-0.397995	18.0649	23.8037
1700029H14Rik_CCDS40233.1_ex7_8:13562238-13562260:+_5-5	TGGAGTTCCGCCCCGTCAC	1700029H14Rik	0.30947	0.460039	0.152778	24.7708	22.2818
1700029I15Rik_CCDS16445.1_ex1_2:92383208-92383230:+_5-1	TCTCAGCAATCTGTTCCGG	1700029I15Rik	0.168291	0.361675	-0.40586	13.9363	18.4639
1700029I15Rik_CCDS16445.1_ex1_2:92383226-92383248:+_5-2	GAGGAATTTTCAGCCCCGC	1700029I15Rik	0.00434467	0.0506493	0.898707	24.4205	13.0984
1700029I15Rik_CCDS16445.1_ex1_2:92383256-92383278:+_5-3	CAGCCTCTCTCAGGCCTGG	1700029I15Rik	0.289602	0.447607	-0.164441	19.1909	21.5079
1700029I15Rik_CCDS16445.1_ex1_2:92383271-92383293:-_5-4	TACTACCCTACCATCCACC	1700029I15Rik	0.0171007	0.114547	0.863315	14.5368	7.99073
1700029I15Rik_CCDS16445.1_ex2_2:92383432-92383454:+_5-5	CTCTTCTCTCTTTAGACTA	1700029I15Rik	0.164991	0.358462	-0.47119	6.95521	9.64168
1700029J07Rik_CCDS22283.1_ex4_8:45968071-45968093:-_5-1	GGACAAGTATCAGCCACCG	1700029J07Rik	0.302851	0.456076	-0.457166	2.77655	3.81177
1700029J07Rik_CCDS22283.1_ex5_8:45970366-45970388:-_5-2	AAGCTTTCATCCCTAGTAG	1700029J07Rik	0.00420877	0.0497632	1.64486	7.80596	2.49617
1700029J07Rik_CCDS22283.1_ex5_8:45970428-45970450:-_5-3	CGTGAATTTGAATCAAGTG	1700029J07Rik	0.0245905	0.135757	0.911538	11.6343	6.18501
1700029J07Rik_CCDS22283.1_ex5_8:45970481-45970503:+_5-4	GGAATCAAAGTATCCTGCC	1700029J07Rik	0.20936	0.400817	0.362727	11.7344	9.12576
1700029J07Rik_CCDS22283.1_ex5_8:45970526-45970548:-_5-5	AATAGACAGATCCTACCGG	1700029J07Rik	0.0481768	0.197761	0.812386	12.0847	6.8815
1700029P11Rik_CCDS37152.1_ex0_15:81980648-81980670:+_5-1	CTCCAGGGCTGTGGTCGCC	1700029P11Rik	0.421872	0.518703	-0.0568529	21.7432	22.6171
1700029P11Rik_CCDS37152.1_ex0_15:81980667-81980689:+_5-2	CGGTCCGCTGCGGCCCGAA	1700029P11Rik	0.00522505	0.0566011	-0.695832	20.1418	32.626
1700029P11Rik_CCDS37152.1_ex0_15:81980761-81980783:-_5-3	CGTCGTAACCATGGAAGTG	1700029P11Rik	0.0896719	0.264119	0.778613	10.4333	6.08182
1700029P11Rik_CCDS37152.1_ex0_15:81980801-81980823:-_5-5	AAGACGGCGTGCATATTCA	1700029P11Rik	0.385648	0.503262	0.687796	2.15101	1.33535
1700030F18Rik_CCDS37207.1_ex1_15:99927792-99927814:-_5-1	GGCACCGATGAGTGCGCTC	1700030F18Rik	0.00037651	0.0115317	0.924646	33.6286	17.7158
1700030F18Rik_CCDS37207.1_ex1_15:99927824-99927846:+_5-2	TGGGTAGCTTGACGTAGAC	1700030F18Rik	0.06038	0.223781	0.893848	7.70587	4.14712
1700030F18Rik_CCDS37207.1_ex1_15:99927840-99927862:+_5-3	GACAGGTCAGCGTTCCACA	1700030F18Rik	0.0756174	0.250219	0.761132	9.95784	5.87546
1700030F18Rik_CCDS37207.1_ex1_15:99927863-99927885:-_5-4	TATAGACAAGCTTCAGTGG	1700030F18Rik	0.0755491	0.250219	-0.997621	3.6273	7.24265
1700030F18Rik_CCDS37207.1_ex2_15:99929825-99929847:+_5-5	ATACCCGAGTGTTTTGAAG	1700030F18Rik	0.0936505	0.269902	-0.813555	5.35381	9.40952
1700030J22Rik_CCDS22695.1_ex0_8:116971777-116971799:+_5-1	TGCTAACTGTCTCGGGCAT	1700030J22Rik	0.362884	0.491451	-0.138608	19.1159	21.0435
1700030J22Rik_CCDS22695.1_ex0_8:116971800-116971822:-_5-2	TATCTGGTGCATGGAGGAG	1700030J22Rik	0.0441272	0.188601	0.659228	19.341	12.2471
1700030J22Rik_CCDS22695.1_ex0_8:116971845-116971867:+_5-3	TTTTCTCCATGCACGTCGG	1700030J22Rik	0.0278718	0.146066	-0.577278	17.1641	25.6094
1700030J22Rik_CCDS22695.1_ex0_8:116971996-116972018:+_5-4	CAACCTCCAAGAGGGACCG	1700030J22Rik	0.156207	0.348793	-0.486614	8.55661	11.9891
1700030J22Rik_CCDS22695.1_ex1_8:116973548-116973570:-_5-5	TCCGGACGAGAAAAGTGAA	1700030J22Rik	0.274974	0.437775	0.41769	4.67822	3.50222
1700030K09Rik_CCDS22414.1_ex0_8:72445103-72445125:-_5-1	AGACTCTGCTCGATGGATG	1700030K09Rik	0.290371	0.44798	0.226843	16.989	14.5171
1700030K09Rik_CCDS22414.1_ex0_8:72445220-72445242:+_5-2	GCCGAGTGGTAACGGTAGC	1700030K09Rik	0.00219586	0.0345578	0.812841	32.0272	18.2318
1700030K09Rik_CCDS22414.1_ex1_8:72449502-72449524:-_5-3	GGCCGAGGAGACTTTAAGC	1700030K09Rik	0.370852	0.495681	-0.28481	2.17603	2.65095
1700030K09Rik_CCDS22414.1_ex1_8:72449522-72449544:+_5-4	CCATACAGTCGACTCGCGT	1700030K09Rik	0.134959	0.324946	0.425335	18.0399	13.4337
1700030K09Rik_CCDS22414.1_ex1_8:72449558-72449580:+_5-5	CCCGACAGGCGAGCAGTGC	1700030K09Rik	0.0293273	0.150216	-0.946545	6.35469	12.2471
1700031F05Rik_CCDS53160.1_ex1_X:102860896-102860918:-_5-1	CAGAATAACACGTTCAACC	1700031F05Rik	0.221533	0.411605	-0.779336	2.40123	4.12132
1700031F05Rik_CCDS53160.1_ex2_X:102861157-102861179:+_5-2	TTGACAGGGGCGGCAGTGC	1700031F05Rik	0.30868	0.459516	0.235039	15.1123	12.8404
1700031F05Rik_CCDS53160.1_ex3_X:102864146-102864168:+_5-3	GCAGGGAATAGTCATGGGC	1700031F05Rik	0.213629	0.404469	0.352576	16.2634	12.7372
1700031F05Rik_CCDS53160.1_ex3_X:102864169-102864191:+_5-4	TGGGATTCCATGAGAAAGA	1700031F05Rik	0.0803014	0.250219	-1.47505	1	2.77993
1700031F05Rik_CCDS53160.1_ex3_X:102864204-102864226:+_5-5	TTCAGAGTCACCGGAATAC	1700031F05Rik	0.00508937	0.0556623	1.15557	15.3876	6.9073
1700034E13Rik_CCDS29249.1_ex0_18:52660473-52660495:+_5-1	GCCACAGTGTCTGAAAAAG	1700034E13Rik	0.192438	0.385313	-0.676078	4.67822	7.47481
1700034E13Rik_CCDS29249.1_ex0_18:52660509-52660531:+_5-2	TCTGTTGCCTAAAGAACTA	1700034E13Rik	0.35395	0.486659	-0.392904	4.82835	6.33978
1700034E13Rik_CCDS29249.1_ex0_18:52660550-52660572:+_5-3	CAGAAGTCAGAACCATTAC	1700034E13Rik	0.264241	0.430654	0.96409	1.95083	1
1700034E13Rik_CCDS29249.1_ex0_18:52660563-52660585:-_5-4	TGACAGAACTTACCAGTAA	1700034E13Rik	0.0188587	0.117173	1.23664	7.70587	3.27005
1700034E13Rik_CCDS29249.1_ex1_18:52663588-52663610:+_5-5	CGCCTTAAACGAAGCTGCT	1700034E13Rik	0.476496	0.540373	-0.0346606	12.46	12.763
1700034F02Rik_CCDS48763.1_ex0_11:29553718-29553740:-_5-1	TGGTGTAATATTCATCAGC	1700034F02Rik	0.516764	0.559009	0.0881573	7.20543	6.77832
1700034F02Rik_CCDS48763.1_ex0_11:29553741-29553763:+_5-2	TACCGAAACGTTTTCGACA	1700034F02Rik	0.470292	0.538167	-0.180978	6.4798	7.34583
1700034F02Rik_CCDS48763.1_ex2_11:29557777-29557799:-_5-3	ACGATACTGCACCTGGGAT	1700034F02Rik	0.0127352	0.0963263	-0.757693	13.6361	23.0556
1700034F02Rik_CCDS48763.1_ex3_11:29560460-29560482:-_5-4	TTCCAGATTAACGGAGTCC	1700034F02Rik	0.0478504	0.196968	-1.19073	3.25197	7.42322
1700034F02Rik_CCDS48763.1_ex3_11:29560640-29560662:-_5-5	ACATTCATACCGAAACTGC	1700034F02Rik	0.0494357	0.200614	0.575572	20.9425	14.0528
1700034J05Rik_CCDS51956.1_ex1_6:146953017-146953039:+_5-1	AGGGGTAGTGCTGTTGAGG	1700034J05Rik	0.0721433	0.245474	-0.478951	17.2642	24.0617
1700034J05Rik_CCDS51956.1_ex1_6:146953176-146953198:+_5-2	CTTATCCATCCACTGGCTA	1700034J05Rik	0.300654	0.454557	0.183395	18.7405	16.5034
1700034J05Rik_CCDS51956.1_ex1_6:146953212-146953234:+_5-3	ATTAGCAAGAGAGTCTGCA	1700034J05Rik	0.0206233	0.12286	-1.4381	2.70149	7.32004
1700034J05Rik_CCDS51956.1_ex1_6:146953237-146953259:+_5-4	GAGTCCACATCGATATCCC	1700034J05Rik	0.149712	0.341578	0.495952	13.1606	9.33213
1700034J05Rik_CCDS51956.1_ex1_6:146953260-146953282:-_5-5	AGCAAGCTAAGCATCACAC	1700034J05Rik	0.424939	0.520169	0.350992	5.4539	4.2761
1700034O15Rik_CCDS20054.1_ex0_6:41684611-41684633:+_5-1	TAGTGAGTGCAAGCTTGGA	1700034O15Rik	0.428147	0.521662	-0.191048	7.18041	8.1971
1700034O15Rik_CCDS20054.1_ex0_6:41684647-41684669:+_5-2	AAGACAAAGTGTCCTCTGA	1700034O15Rik	0.0262417	0.141131	1.71599	5.40385	1.6449
1700034O15Rik_CCDS20054.1_ex0_6:41684660-41684682:-_5-3	CTCCTCTACCCACCTTCAG	1700034O15Rik	0.19395	0.386675	-0.288889	19.7164	24.0875
1700034O15Rik_CCDS20054.1_ex1_6:41685199-41685221:+_5-4	TCTTTTATGTTGTAGACCA	1700034O15Rik	0.0803014	0.250219	-1.68637	1	3.21846
1700034O15Rik_CCDS20054.1_ex1_6:41685240-41685262:+_5-5	CACTTTGAGGCTTCATCAG	1700034O15Rik	0.0415011	0.18241	0.522057	26.8476	18.6961
1700037C18Rik_CCDS49746.1_ex1_16:3906840-3906862:-_5-1	GGGACAGCCTGGGAAATAC	1700037C18Rik	0.159837	0.353169	-0.662859	4.428	7.01048
1700037C18Rik_CCDS49746.1_ex1_16:3906948-3906970:-_5-2	GCAGCCTGACACGGCCTGA	1700037C18Rik	0.243916	0.429284	0.229704	18.5654	15.8327
1700037C18Rik_CCDS49746.1_ex1_16:3906972-3906994:-_5-3	GGCTAGGCCGGCTCATGGC	1700037C18Rik	0.300957	0.454751	0.18552	28.449	25.0161
1700037C18Rik_CCDS49746.1_ex1_16:3907006-3907028:+_5-4	TTGGCCAGCAGGCTGCATG	1700037C18Rik	0.13298	0.32241	-0.322229	20.442	25.5579
1700037C18Rik_CCDS49746.1_ex1_16:3907052-3907074:-_5-5	CTTCCGACTGCGACACCTC	1700037C18Rik	0.0102291	0.085004	-0.668921	17.9899	28.6018
1700037H04Rik_CCDS16756.1_ex1_2:131147244-131147266:-_5-1	AGTACTCGGCACACAAAGA	1700037H04Rik	0.172482	0.36594	-0.448004	7.88102	10.7509
1700037H04Rik_CCDS16756.1_ex2_2:131148255-131148277:+_5-2	GGTAATCTCATACCTGTGC	1700037H04Rik	0.167699	0.361044	-0.436274	7.83098	10.5961
1700037H04Rik_CCDS16756.1_ex3_2:131151644-131151666:-_5-3	TCGGTGGTCATGGTTACTC	1700037H04Rik	0.143222	0.334296	0.456863	11.5342	8.40347
1700037H04Rik_CCDS16756.1_ex3_2:131151668-131151690:+_5-4	ATGCAGCTTTTCATCAAAG	1700037H04Rik	0.495469	0.547977	0.0713283	5.92931	5.64329
1700037H04Rik_CCDS16756.1_ex3_2:131151680-131151702:+_5-5	ATCAAAGTGGACGTGGCTC	1700037H04Rik	0.141404	0.33232	-0.478714	8.38146	11.6796
1700039E15Rik_CCDS21238.1_ex1_7:45286456-45286478:+_5-1	GATCAACCTGATAGCCAAC	1700039E15Rik	0.374313	0.497302	-0.336408	5.87927	7.42322
1700039E15Rik_CCDS21238.1_ex1_7:45286527-45286549:-_5-2	TCCAGGCTAGGTATTCCAG	1700039E15Rik	0.374016	0.497266	-0.262104	8.70674	10.4414
1700039E15Rik_CCDS21238.1_ex2_7:45286870-45286892:+_5-3	CCCCCCTACAGATTATGGA	1700039E15Rik	0.226075	0.41563	0.386312	10.9837	8.40347
1700039E15Rik_CCDS21238.1_ex2_7:45286894-45286916:-_5-4	AGGCCACATACGACAGGCC	1700039E15Rik	0.294715	0.451065	-0.270539	7.18041	8.66143
1700039E15Rik_CCDS21238.1_ex2_7:45287062-45287084:+_5-5	AGCATCCCAATCTGGTACA	1700039E15Rik	0.290611	0.448144	0.195713	15.5627	13.5885
1700040L02Rik_CCDS23905.1_ex3_10:68509741-68509763:+_5-1	CTCGTAGAGCCTGTAGTGC	1700040L02Rik	0.340794	0.479564	-0.226458	12.2098	14.285
1700040L02Rik_CCDS23905.1_ex4_10:68516369-68516391:-_5-2	GACAGCATTAAGTGGCTCG	1700040L02Rik	0.323626	0.469232	0.268582	13.3858	11.1121
1700040L02Rik_CCDS23905.1_ex5_10:68525608-68525630:+_5-3	TGAAGTAGCATGTCCAGCA	1700040L02Rik	0.0511843	0.204253	0.582773	18.6905	12.4792
1700040L02Rik_CCDS23905.1_ex6_10:68533844-68533866:+_5-5	AGGTCAATGATCTGGTCAG	1700040L02Rik	0.01378	0.100809	-1.08109	5.67909	12.0149
1700042B14Rik_CCDS53232.1_ex0_X:155125577-155125599:-_2-1	CCATTCCTTTGTATATTCG	1700042B14Rik	0.0242784	0.134867	1.35131	5.57901	2.18662
1700042B14Rik_CCDS53232.1_ex0_X:155125689-155125711:-_2-2	GTGGTCCTCAAGCCTACAG	1700042B14Rik	0.0823426	0.253343	0.544874	16.964	11.628
1700042G07Rik_CCDS51276.1_ex0_4:116173480-116173502:-_5-1	ATACTGGGACACCGGCGCC	1700042G07Rik	0.211015	0.402158	-0.389679	11.8095	15.4716
1700042G07Rik_CCDS51276.1_ex0_4:116173498-116173520:+_5-2	TATGTTCAAGTGTAGCCGC	1700042G07Rik	0.306794	0.458281	-0.299308	10.9587	13.4853
1700042G07Rik_CCDS51276.1_ex0_4:116173521-116173543:+_5-3	CATACCGGCAGAAACCCCG	1700042G07Rik	0.187183	0.380598	0.377906	13.8362	10.6477
1700042G07Rik_CCDS51276.1_ex0_4:116173536-116173558:-_5-4	TGGTGGCAGTTGGGCCTCG	1700042G07Rik	0.108319	0.290681	-0.384244	17.2893	22.5655
1700042G07Rik_CCDS51276.1_ex0_4:116173571-116173593:+_5-5	GCCACAAACATCAGTGACA	1700042G07Rik	0.401856	0.510826	0.141949	5.62905	5.10157
1700049G17Rik_CCDS21032.1_ex0_7:27912087-27912109:-_4-1	GACTACAGGGTTATAAAGG	1700049G17Rik	0.337436	0.477756	-0.813472	1.20018	2.10923
1700049G17Rik_CCDS21032.1_ex0_7:27912108-27912130:-_4-2	ACAACCATAGTATATTCAG	1700049G17Rik	0.0803014	0.250219	-1.66306	1	3.16687
1700049G17Rik_CCDS21032.1_ex0_7:27912150-27912172:-_4-3	GTAGAATTCTTGATCTCGA	1700049G17Rik	0.237373	0.424256	0.332092	10.7085	8.50665
1700049G17Rik_CCDS21032.1_ex0_7:27912204-27912226:-_4-4	CAGAAAATTCTATTAGTAA	1700049G17Rik	0.319279	0.466341	-0.42274	1.15013	1.54172
1700052N19Rik_CCDS56676.1_ex2_10:4439599-4439621:+_5-1	CACATATGGAATCAATACC	1700052N19Rik	0.0803014	0.250219	-1.37815	1	2.59936
1700052N19Rik_CCDS56676.1_ex2_10:4439634-4439656:+_5-2	CCTTTTAAATGAAGGCGAT	1700052N19Rik	0.298789	0.453133	-0.499323	3.6273	5.12737
1700052N19Rik_CCDS56676.1_ex2_10:4439715-4439737:+_5-3	TCATGAAGCCATCATGCAG	1700052N19Rik	3.76e-05	0.00249185	-2.13419	2.80158	12.2987
1700052N19Rik_CCDS56676.1_ex3_10:4450656-4450678:-_5-4	CTTAAACACGTCGAAGTCA	1700052N19Rik	0.126158	0.313655	0.848909	4.72826	2.62515
1700052N19Rik_CCDS56676.1_ex3_10:4450689-4450711:+_5-5	GAGAACTTCTTCGAGTCGC	1700052N19Rik	0.30868	0.459516	0.263422	15.4126	12.8404
1700054O13Rik_CCDS30012.1_ex0_X:9847126-9847148:+_5-1	GTGTACCGTATACTGCAGG	1700054O13Rik	0.0031522	0.0432582	1.19982	15.0373	6.54615
1700054O13Rik_CCDS30012.1_ex0_X:9847149-9847171:+_5-2	GCAATATACCCCCTGCATA	1700054O13Rik	0.164728	0.358136	0.295208	25.8217	21.0435
1700054O13Rik_CCDS30012.1_ex0_X:9847161-9847183:-_5-3	GAAGTTGTGGACCCTATGC	1700054O13Rik	0.11962	0.305371	-0.537913	7.2805	10.5703
1700054O13Rik_CCDS30012.1_ex0_X:9847189-9847211:-_5-4	GTAATCAAGCATGGCAAGA	1700054O13Rik	0.0745629	0.249474	-0.55086	11.4592	16.7872
1700054O13Rik_CCDS30012.1_ex0_X:9847210-9847232:-_5-5	CTCCAGGATGTAGTCGGTG	1700054O13Rik	0.298519	0.452969	-0.258839	11.8095	14.1302
1700055N04Rik_CCDS57128.1_ex1_19:3963871-3963893:+_5-1	GAAGGAGGCCTTCAACACA	1700055N04Rik	0.216386	0.406828	-0.424471	5.70412	7.65538
1700055N04Rik_CCDS57128.1_ex1_19:3963896-3963918:+_5-2	ACAAAGACGGCTAAGTTCA	1700055N04Rik	0.110948	0.294159	-0.840071	4.00263	7.16526
1700055N04Rik_CCDS57128.1_ex1_19:3963962-3963984:+_5-3	AAACAGCTTCATGACGCCC	1700055N04Rik	0.356821	0.488402	0.283547	8.15626	6.70093
1700055N04Rik_CCDS57128.1_ex3_19:3964902-3964924:+_5-4	GATGATCATACCTTTAGTG	1700055N04Rik	0.0579787	0.218781	-0.846043	5.57901	10.0286
1700055N04Rik_CCDS57128.1_ex6_19:3965638-3965660:-_5-5	TGACGATCTTGCCTACCCG	1700055N04Rik	0.160577	0.353672	-0.530029	8.60666	12.4277
1700056E22Rik_CCDS56665.1_ex0_1:184033425-184033447:+_5-1	GCGCTCCTTGGCTCGCCGA	1700056E22Rik	0.0738121	0.248299	0.560413	19.316	13.0984
1700056E22Rik_CCDS56665.1_ex0_1:184033501-184033523:+_5-2	GGGCTCCAAAACATCGCAC	1700056E22Rik	0.000478097	0.013513	-1.16488	9.70762	21.7658
1700056E22Rik_CCDS56665.1_ex0_1:184033548-184033570:+_5-3	GACCGCGTTGGGAGGAGGT	1700056E22Rik	0.247242	0.430654	-0.260402	14.0364	16.813
1700056E22Rik_CCDS56665.1_ex0_1:184033695-184033717:-_5-4	ACTCCGGAGAGCTACTCGG	1700056E22Rik	0.0226786	0.129647	-0.60831	18.4403	28.1117
1700056E22Rik_CCDS56665.1_ex0_1:184033718-184033740:+_5-5	CGCCTTCGGGATCGGAGTC	1700056E22Rik	0.033723	0.162544	-0.715923	10.2831	16.8904
1700057G04Rik_CCDS23406.1_ex2_9:92351037-92351059:+_5-1	CATTAGACCTTTCACCATG	1700057G04Rik	0.457613	0.533662	0.0359875	34.9047	34.0448
1700057G04Rik_CCDS23406.1_ex2_9:92351102-92351124:-_5-2	AACAACAATCACATCGTAG	1700057G04Rik	0.000551944	0.0147956	-1.93536	2.25109	8.60984
1700057G04Rik_CCDS23406.1_ex3_9:92352562-92352584:-_5-3	TTTGAATAACATAACCCAC	1700057G04Rik	0.171101	0.364313	-0.973771	2.15101	4.22451
1700057G04Rik_CCDS23406.1_ex3_9:92352592-92352614:-_5-4	CTGTAAACTTTGGCCGACA	1700057G04Rik	0.224338	0.413635	0.338609	13.9864	11.0605
1700061G19Rik_CCDS37666.1_ex1_17:56877366-56877388:-_5-1	CGCTTAGATGTCCAGTAGC	1700061G19Rik	0.377382	0.498736	0.234318	9.15714	7.78436
1700061G19Rik_CCDS37666.1_ex1_17:56877453-56877475:-_5-2	GCCGCGCTCATGATCAAGT	1700061G19Rik	0.0158317	0.109497	-0.782366	12.385	21.3015
1700061G19Rik_CCDS37666.1_ex1_17:56877493-56877515:-_5-3	GTACTTGGAACCGATCGCC	1700061G19Rik	0.0021845	0.0344496	-1.18487	6.93019	15.7553
1700061G19Rik_CCDS37666.1_ex1_17:56877535-56877557:+_5-4	ACCTACATCGAGTACTACG	1700061G19Rik	0.0591784	0.22126	0.697341	14.0865	8.68723
1700061G19Rik_CCDS37666.1_ex5_17:56882634-56882656:+_5-5	TATATAACCAGGGTACCAC	1700061G19Rik	0.0175409	0.115993	0.939192	13.9864	7.29424
1700065I17Rik_CCDS29260.1_ex1_18:56592379-56592401:+_5-1	GGACGATATTCACTTGCCC	1700065I17Rik	0.260481	0.430654	0.262429	11.5342	9.61588
1700065I17Rik_CCDS29260.1_ex1_18:56592396-56592418:+_5-2	CCCGGTTCTCACTAAAGCA	1700065I17Rik	0.135401	0.325394	-0.432547	14.3116	19.3152
1700065I17Rik_CCDS29260.1_ex1_18:56592425-56592447:-_5-3	AGGCATGACGTAACGGGTC	1700065I17Rik	0.105261	0.286118	-0.569318	7.90604	11.7312
1700065I17Rik_CCDS29260.1_ex2_18:56594458-56594480:-_5-4	GGGCCAGCATAGATCCCAC	1700065I17Rik	0.244133	0.429515	0.302911	12.7853	10.364
1700065I17Rik_CCDS29260.1_ex2_18:56594507-56594529:+_5-5	AGCGAGAGGCTTTGCCATG	1700065I17Rik	0.197331	0.389704	0.264603	24.8459	20.6824
1700066B19Rik_CCDS50252.1_ex1_18:35728550-35728572:+_5-1	GCCCCCTCGAGGTGGCGAC	1700066B19Rik	0.511125	0.556141	-0.0326077	19.7914	20.2439
1700066B19Rik_CCDS50252.1_ex1_18:35728589-35728611:-_5-2	AGGACAAAGGCCGCGATGA	1700066B19Rik	0.141405	0.33232	0.588206	7.6308	5.07578
1700066B19Rik_CCDS50252.1_ex1_18:35728614-35728636:+_5-3	GCGATCTGCATTGTGCTGG	1700066B19Rik	0.0134981	0.0997241	-0.684954	17.6145	28.318
1700066B19Rik_CCDS50252.1_ex1_18:35728642-35728664:+_5-4	TTGGGCCTGCACTGCATCA	1700066B19Rik	0.0282418	0.146941	0.752515	16.9389	10.0544
1700066B19Rik_CCDS50252.1_ex1_18:35728709-35728731:+_5-5	CGGCGTTTACCTCATCCAC	1700066B19Rik	0.122658	0.309501	0.745364	8.20631	4.89521
1700066M21Rik_CCDS48264.1_ex0_1:57377851-57377873:-_5-1	GCAGTTCGTTGCTGCGCTG	1700066M21Rik	0.481481	0.542393	0.00933626	23.5948	23.4426
1700066M21Rik_CCDS48264.1_ex0_1:57377931-57377953:-_5-2	CGTTACCTGCACGTCCCCA	1700066M21Rik	0.475808	0.540102	-0.0518167	17.4144	18.0512
1700066M21Rik_CCDS48264.1_ex1_1:57382825-57382847:-_5-3	TAACTATTGGGAAAACGGC	1700066M21Rik	0.0211364	0.12478	1.21334	9.25723	3.99234
1700066M21Rik_CCDS48264.1_ex1_1:57382944-57382966:-_5-4	GCTTAAAGGCTCCAAAGTC	1700066M21Rik	0.022198	0.128271	-1.08738	4.02765	8.55825
1700066M21Rik_CCDS48264.1_ex1_1:57382989-57383011:+_5-5	CTTTTAACCTGACTCAGAA	1700066M21Rik	0.464476	0.535868	0.0628839	6.73001	6.44297
1700067K01Rik_CCDS22464.2_ex2_8:84003130-84003152:-_5-1	CAAGCGCAGTGTTAGCTGC	1700067K01Rik	0.481016	0.542372	-0.00557907	14.4868	14.5429
1700067K01Rik_CCDS22464.2_ex2_8:84003178-84003200:+_5-2	TTTGGGTTCGTGGACCTGG	1700067K01Rik	0.277974	0.439741	-0.243445	11.6093	13.7433
1700067K01Rik_CCDS22464.2_ex3_8:84003301-84003323:-_5-3	AACCTCCCGCAGAAAAAGC	1700067K01Rik	0.251482	0.430654	-0.367581	9.53247	12.2987
1700067K01Rik_CCDS22464.2_ex3_8:84003338-84003360:-_5-4	TCGGAAGATGGACACGTCG	1700067K01Rik	0.0308478	0.154436	0.663085	21.0676	13.3047
1700067K01Rik_CCDS22464.2_ex3_8:84003369-84003391:-_5-5	GACTGGCAGTATAGGCAGC	1700067K01Rik	0.441377	0.527072	-0.11094	14.1115	15.2394
1700067P10Rik_CCDS28857.1_ex1_17:48090324-48090346:-_5-1	ACCTTTGAAGCTTGCTCCG	1700067P10Rik	0.335838	0.476877	-0.164462	10.2831	11.5248
1700067P10Rik_CCDS28857.1_ex1_17:48090405-48090427:+_5-2	CCCTCTTCTAGTCTCTCGG	1700067P10Rik	0.0351301	0.166574	0.476821	32.5526	23.391
1700067P10Rik_CCDS28857.1_ex1_17:48090429-48090451:+_5-3	GTCCAGCTTGCCATCAGAG	1700067P10Rik	0.147296	0.339314	0.469183	14.0614	10.1576
1700067P10Rik_CCDS28857.1_ex1_17:48090502-48090524:+_5-4	TCTCCGAAGGAAAAAGCTG	1700067P10Rik	0.00849174	0.0759526	1.76516	5.85425	1.72229
1700067P10Rik_CCDS28857.1_ex1_17:48090568-48090590:-_5-5	CACGCTCATAGGCACCAGC	1700067P10Rik	0.359039	0.489455	0.190395	17.3893	15.2394
1700074P13Rik_CCDS20041.1_ex2_6:40926015-40926037:+_5-1	AGGATTCATTAAATGCCAT	1700074P13Rik	0.144555	0.335844	-0.65012	4.30289	6.75252
1700074P13Rik_CCDS20041.1_ex2_6:40926040-40926062:-_5-2	GGAACTATAGCCATAGCTA	1700074P13Rik	0.150649	0.342566	0.696535	7.0553	4.35349
1700074P13Rik_CCDS20041.1_ex2_6:40926063-40926085:+_5-3	CATACATGTTGATAGTAGC	1700074P13Rik	0.0840946	0.256286	-0.975216	3.00175	5.90125
1700074P13Rik_CCDS20041.1_ex2_6:40926210-40926232:-_5-4	CAAGAACTAAAATCCGACT	1700074P13Rik	0.337436	0.477756	-0.979931	1.20018	2.36719
1700074P13Rik_CCDS20041.1_ex3_6:40928562-40928584:+_5-5	CCAACACAAGGCTCTGGGC	1700074P13Rik	0.0324016	0.158797	0.700469	17.8898	11.0089
1700080E11Rik_CCDS23463.1_ex1_9:105144479-105144501:-_5-1	CTAACACTAGAGCAGCTCC	1700080E11Rik	0.0854558	0.257756	0.446213	20.5171	15.0589
1700080E11Rik_CCDS23463.1_ex1_9:105144498-105144520:+_5-2	AGGCATTTGACATAGAAAT	1700080E11Rik	0.397831	0.508751	-0.131381	7.93107	8.68723
1700080E11Rik_CCDS23463.1_ex1_9:105144528-105144550:+_5-3	TTTGATTTGGACTCAGCGA	1700080E11Rik	0.26739	0.433059	0.213766	18.6905	16.1165
1700080E11Rik_CCDS23463.1_ex1_9:105144546-105144568:+_5-4	AGGGAGCTTCGGTAGTCGG	1700080E11Rik	0.192611	0.385555	-0.280485	24.2704	29.4789
1700080E11Rik_CCDS23463.1_ex1_9:105144649-105144671:+_5-5	GATCGTCCACAAAACCACC	1700080E11Rik	0.175156	0.369035	-0.53309	7.0553	10.2092
1700080O16Rik_CCDS53068.1_ex0_X:51969305-51969327:-_5-1	TTCGAGGCGTACCAAAGAT	1700080O16Rik	0.0841883	0.256347	0.731017	8.68172	5.23055
1700080O16Rik_CCDS53068.1_ex0_X:51969355-51969377:-_5-2	CTCTCTTGTCAATGCCCTC	1700080O16Rik	0.0138674	0.101292	0.516131	42.7115	29.8658
1700080O16Rik_CCDS53068.1_ex0_X:51969436-51969458:+_5-3	TCAGATGCCTTAGTAAAGA	1700080O16Rik	0.275449	0.437951	0.266162	10.6334	8.842
1700080O16Rik_CCDS53068.1_ex0_X:51969573-51969595:+_5-4	ATTGAGTATCTGCTGCCTA	1700080O16Rik	0.23369	0.421253	0.297368	15.9381	12.9694
1700080O16Rik_CCDS53068.1_ex0_X:51969680-51969702:-_5-5	ATGTACTGGGTTCATCCCA	1700080O16Rik	0.0136545	0.100305	-0.763254	12.9605	21.998
1700084C01Rik_CCDS15466.1_ex0_1:169930090-169930112:-_5-1	TAGCGATTTCACGTGATAG	1700084C01Rik	0.24713	0.430654	0.648246	3.95258	2.52197
1700084C01Rik_CCDS15466.1_ex1_1:169933098-169933120:-_5-2	TTACCTAATTTTAGGCTCC	1700084C01Rik	0.601933	0.625625	-0.00801943	6.30464	6.33978
1700084C01Rik_CCDS15466.1_ex2_1:169933685-169933707:-_5-3	GGTCATGTAAAGAGGGCAC	1700084C01Rik	0.0430953	0.186147	0.928993	8.68172	4.55986
1700084C01Rik_CCDS15466.1_ex2_1:169933706-169933728:-_5-4	TCAGGGTGTCTTTGAGGAC	1700084C01Rik	0.295766	0.451663	0.254373	15.1624	12.7114
1700084C01Rik_CCDS15466.1_ex2_1:169933810-169933832:+_5-5	ACGAATCCACTGAAGGGCG	1700084C01Rik	0.304751	0.456926	0.185817	16.6887	14.6719
1700088E04Rik_CCDS27633.1_ex2_15:79135716-79135738:-_5-1	CCAAAATATCTTTGCCACT	1700088E04Rik	0.147327	0.339314	-0.470886	10.158	14.0786
1700088E04Rik_CCDS27633.1_ex3_15:79136329-79136351:+_5-2	TCACGACTGTACGCCCCAT	1700088E04Rik	0.0128038	0.09662	0.681528	28.1237	17.5353
1700088E04Rik_CCDS27633.1_ex3_15:79136344-79136366:-_5-3	CAGCTTGTGCCAAGCCAAT	1700088E04Rik	0.130008	0.3183	-0.664866	4.17778	6.62354
1700088E04Rik_CCDS27633.1_ex4_15:79139250-79139272:-_5-4	TTCCAGCAACGCCACATCA	1700088E04Rik	0.295425	0.451392	0.192831	22.0184	19.2636
1700088E04Rik_CCDS27633.1_ex4_15:79139289-79139311:-_5-5	TATTTTGCAGTTATGATGA	1700088E04Rik	0.406113	0.51265	-0.122918	12.8103	13.9496
1700092M07Rik_CCDS50382.1_ex1_19:8740974-8740996:+_5-1	GCAACGAAGTGGACAACTC	1700092M07Rik	0.375699	0.497942	0.15595	11.8345	10.6219
1700092M07Rik_CCDS50382.1_ex1_19:8740997-8741019:-_5-2	GTTAGATCTTTGTTTACGG	1700092M07Rik	0.343869	0.481439	-0.689293	2.07594	3.34744
1700092M07Rik_CCDS50382.1_ex1_19:8741035-8741057:-_5-3	GATAGCCTGCGCCACAGCA	1700092M07Rik	0.40537	0.512326	0.106807	9.63255	8.94519
1700092M07Rik_CCDS50382.1_ex1_19:8741051-8741073:+_5-4	CTATCCATGTTCAGCCGTC	1700092M07Rik	0.223425	0.413141	0.163826	60.477	53.9851
1700092M07Rik_CCDS50382.1_ex1_19:8741066-8741088:-_5-5	TGACCGCGAGGACTCCCGA	1700092M07Rik	0.0074364	0.0699454	-0.756372	16.7638	28.318
1700093K21Rik_CCDS24477.1_ex1_11:23517278-23517300:+_5-1	ATGTTGTCTCCTAAGGATG	1700093K21Rik	0.0934144	0.269704	0.651228	9.63255	6.13342
1700093K21Rik_CCDS24477.1_ex1_11:23517318-23517340:+_5-2	GCTTTTGCACAAGAATGCT	1700093K21Rik	0.00309893	0.042781	0.898838	25.0961	13.4595
1700093K21Rik_CCDS24477.1_ex2_11:23518089-23518111:-_5-3	AGACCCTCTGTACAGGCGA	1700093K21Rik	0.348733	0.484006	0.181964	16.0882	14.1818
1700093K21Rik_CCDS24477.1_ex3_11:23518788-23518810:+_5-4	TAGAAAAATTGCCAGTAAG	1700093K21Rik	0.162466	0.35603	0.407712	12.5851	9.4869
1700093K21Rik_CCDS24477.1_ex3_11:23518800-23518822:-_5-5	ATTTGTATCCTCCTCTTAC	1700093K21Rik	0.458433	0.533968	-0.236137	3.47717	4.09553
1700094D03Rik_CCDS50968.1_ex2_3:90064433-90064455:+_5-2	TTTTCATATTCACTGTATG	1700094D03Rik	0.0189882	0.117173	-2.08757	1	4.2503
1700094D03Rik_CCDS50968.1_ex2_3:90064454-90064476:+_5-3	GCAGACAACATTGGACCAA	1700094D03Rik	0.334445	0.47594	0.44907	5.20368	3.81177
1700094D03Rik_CCDS50968.1_ex2_3:90064478-90064500:+_5-4	AAACCTATTTGCTGCCCTA	1700094D03Rik	0.139353	0.329731	-0.563582	8.35644	12.3503
1700094D03Rik_CCDS50968.1_ex3_3:90065506-90065528:-_5-5	TAAGGCAGCTTGACGGACC	1700094D03Rik	0.487187	0.544726	-0.0742464	11.5592	12.1697
1700101E01Rik_CCDS50551.1_ex5_2:29054806-29054828:+_5-1	CGCTCACCTTGACGATGAG	1700101E01Rik	0.287189	0.445916	0.187326	18.6154	16.3487
1700101E01Rik_CCDS50551.1_ex5_2:29054820-29054842:+_5-2	ATGAGCGGGTTCTGAAACA	1700101E01Rik	0.100633	0.279889	-0.69432	6.22958	10.0802
1700101E01Rik_CCDS50551.1_ex5_2:29054862-29054884:-_5-3	TACGGGCATGGAGAACGAA	1700101E01Rik	0.222683	0.412411	0.643764	5.02853	3.21846
1700101E01Rik_CCDS50551.1_ex5_2:29054878-29054900:-_5-4	CGGTGGTCGACATCCGTAC	1700101E01Rik	0.180441	0.374305	0.422047	15.3375	11.4474
1700101E01Rik_CCDS50551.1_ex5_2:29054891-29054913:+_5-5	GACCACCGTCAGCGGCCGT	1700101E01Rik	0.131769	0.320967	-0.292148	28.4991	34.896
1700102P08Rik_CCDS23524.1_ex0_9:108393357-108393379:+_5-1	CACCTCCCAGCCGGTACAC	1700102P08Rik	0.0112394	0.0894626	0.535516	43.8875	30.2785
1700102P08Rik_CCDS23524.1_ex0_9:108393460-108393482:-_5-2	ATGGTGTGTCCCGAAGGCC	1700102P08Rik	0.185085	0.378759	0.317539	19.8915	15.9617
1700102P08Rik_CCDS23524.1_ex0_9:108393504-108393526:+_5-3	GCAGCCTCTATACCCCAAA	1700102P08Rik	0.349417	0.484006	-0.164022	9.4574	10.5961
1700102P08Rik_CCDS23524.1_ex1_9:108395282-108395304:+_5-4	CTGGACCGCAGGAAGGATA	1700102P08Rik	0.00734879	0.0695233	-1.23179	5.20368	12.2213
1700102P08Rik_CCDS23524.1_ex2_9:108397203-108397225:+_5-5	ATCCGAACTATTGAAGAAT	1700102P08Rik	0.275125	0.437868	0.60343	4.02765	2.65095
1700106J16Rik_CCDS48881.1_ex0_11:88294194-88294216:-_5-1	GGAGGGCCATGACTGAGAC	1700106J16Rik	0.00690839	0.0668896	-1.03342	7.15539	14.6461
1700106J16Rik_CCDS48881.1_ex0_11:88294222-88294244:-_5-2	TCTCCAAGTCGGCCGGCAG	1700106J16Rik	0.264819	0.431156	-0.204054	17.014	19.599
1700106J16Rik_CCDS48881.1_ex0_11:88294253-88294275:+_5-3	GAAGGTGGCCGGGGTACAA	1700106J16Rik	0.0397697	0.17836	-0.899475	5.92931	11.0605
1700106J16Rik_CCDS48881.1_ex0_11:88294314-88294336:-_5-4	GAAGGCGTCCTCCAAGTAA	1700106J16Rik	0.482994	0.542925	0.0522955	7.83098	7.5522
1700106J16Rik_CCDS48881.1_ex0_11:88294327-88294349:+_5-5	ACGCCTTCTGCCAGATGAG	1700106J16Rik	0.118984	0.30453	-0.49979	12.3099	17.4063
1700109H08Rik_CCDS39001.1_ex1_5:3575651-3575673:+_5-1	CGACTTTTCTATAGCTTGG	1700109H08Rik	0.0069504	0.067181	0.814244	22.669	12.892
1700109H08Rik_CCDS39001.1_ex1_5:3575687-3575709:+_5-2	AAGATGGATAATACCGGGC	1700109H08Rik	0.338104	0.477858	-0.11952	24.5706	26.6929
1700109H08Rik_CCDS39001.1_ex1_5:3575732-3575754:-_5-3	CATTCCGAATATGTTCTGC	1700109H08Rik	0.54856	0.579687	-0.0511385	9.03203	9.35792
1700109H08Rik_CCDS39001.1_ex2_5:3577283-3577305:+_5-4	GAAGAGTGGATTAAAGGCT	1700109H08Rik	0.320838	0.46724	0.631994	4.428	2.85732
1700109H08Rik_CCDS39001.1_ex2_5:3577316-3577338:-_5-5	CTTCTCTTCAAAAGTCCCT	1700109H08Rik	0.425963	0.520378	0.0698145	21.8432	20.8114
1700110M21Rik_CCDS36999.1_ex0_14:101198420-101198442:-_5-1	ACAGTTTCTGCAGCGCCTG	1700110M21Rik	0.231054	0.419012	0.179588	33.5034	29.582
1700110M21Rik_CCDS36999.1_ex0_14:101198533-101198555:-_5-2	GGGGTATGTGTGCCAAGCA	1700110M21Rik	0.0104726	0.0859504	0.625865	35.1799	22.7977
1700110M21Rik_CCDS36999.1_ex0_14:101198667-101198689:+_5-3	GTAAGTCCTGAAGGCGGGA	1700110M21Rik	0.430466	0.522359	-0.182775	10.108	11.4732
1700110M21Rik_CCDS36999.1_ex0_14:101198940-101198962:+_5-5	AAGAGAAGAAATAAGCCTG	1700110M21Rik	0.0189882	0.117173	-1.969	1	3.91496
1700112E06Rik_CCDS49415.1_ex2_14:22577920-22577942:-_5-1	GGGTAACCCTGGCAACACG	1700112E06Rik	0.079144	0.250219	-0.731973	5.92931	9.84805
1700112E06Rik_CCDS49415.1_ex3_14:22584435-22584457:-_5-2	GGATGGTGTCACTTCTGCC	1700112E06Rik	0.0283298	0.147289	0.368045	64.0802	49.6514
1700112E06Rik_CCDS49415.1_ex3_14:22584471-22584493:-_5-3	ACATGCCACGTTTCCCAGG	1700112E06Rik	0.0930893	0.269499	0.465352	17.5145	12.6856
1700112E06Rik_CCDS49415.1_ex3_14:22584483-22584505:+_5-4	GTGGCATGTCCCAATGAGC	1700112E06Rik	0.474762	0.539924	-0.0162928	13.4359	13.5885
1700112E06Rik_CCDS49415.1_ex4_14:22596421-22596443:-_5-5	TTGTGCAGAACAAAGCACC	1700112E06Rik	0.0803014	0.250219	-1.70931	1	3.27005
1700113H08Rik_CCDS48660.1_ex2_10:87165067-87165089:-_5-1	AAATGTCTCCATGTGAGTA	1700113H08Rik	0.0469373	0.194917	-1.01065	3.92756	7.91334
1700113H08Rik_CCDS48660.1_ex3_10:87225885-87225907:+_5-2	GAACTCATAGTCCAATGAC	1700113H08Rik	0.264241	0.430654	-0.947598	1	1.92866
1700113H08Rik_CCDS48660.1_ex3_10:87225951-87225973:-_5-3	CGAGGGAAATGGTGCTCGC	1700113H08Rik	0.492235	0.546515	-0.0543688	16.5886	17.2257
1700113H08Rik_CCDS48660.1_ex3_10:87226003-87226025:-_5-4	ATTTCACTGGATGATGACA	1700113H08Rik	0.181821	0.375631	-0.471307	5.42888	7.5264
1700113H08Rik_CCDS48660.1_ex3_10:87226068-87226090:-_5-5	GATTGGGTAGTCGTCTAGG	1700113H08Rik	0.418965	0.517512	0.101459	9.70762	9.04837
1700122O11Rik_CCDS57099.1_ex0_17:48037056-48037078:+_5-2	CTAGATCCCAATGAGGGCA	1700122O11Rik	0.209661	0.40088	-0.507832	4.80333	6.82991
1700122O11Rik_CCDS57099.1_ex0_17:48037158-48037180:+_5-3	GTTCCACGGAGTGAGGGCA	1700122O11Rik	0.0416046	0.182578	-0.657999	12.9605	20.4502
1700122O11Rik_CCDS57099.1_ex0_17:48037178-48037200:+_5-4	GGAGAAATCTTCCCACCAC	1700122O11Rik	0.123873	0.310794	-0.4309	11.5342	15.549
1700122O11Rik_CCDS57099.1_ex0_17:48037250-48037272:+_5-5	CTGCTTGGGTACTCCAAGA	1700122O11Rik	0.263653	0.430654	0.481042	6.00438	4.3019
1700123I01Rik_CCDS50364.1_ex0_19:6195746-6195768:+_5-1	ATAAGTTCAAAATCAGATA	1700123I01Rik	0.632121	0.63387	0	1	1
1700123I01Rik_CCDS50364.1_ex3_19:6212151-6212173:+_5-2	CCCACCTGAAGTTTAAACA	1700123I01Rik	0.3703	0.495413	-0.227821	5.85425	6.85571
1700123I01Rik_CCDS50364.1_ex3_19:6212183-6212205:-_5-3	AACAAACGGGTAGGGCGTC	1700123I01Rik	0.217744	0.408129	0.412746	11.0838	8.32608
1700123I01Rik_CCDS50364.1_ex5_19:6213337-6213359:+_5-4	AAATGGAAACGGAAACTCA	1700123I01Rik	0.0299312	0.151884	1.1155	7.75591	3.57961
1700123I01Rik_CCDS50364.1_ex5_19:6213372-6213394:-_5-5	TGTGGCCCCTGCCTGCTAG	1700123I01Rik	0.00228986	0.0355166	0.82111	32.3024	18.2834
1700123K08Rik_CCDS51680.1_ex1_5:138562533-138562555:+_5-1	CATCCTGCCCTAGGGGATC	1700123K08Rik	0.488183	0.545044	-0.404504	2.62642	3.47642
1700123K08Rik_CCDS51680.1_ex2_5:138562846-138562868:-_5-2	CCCTCCATGTTGGAGGATC	1700123K08Rik	0.194788	0.387609	-0.356181	12.5101	16.0133
1700123K08Rik_CCDS51680.1_ex2_5:138562881-138562903:+_5-3	GGGTATCTATGTCTGGGGA	1700123K08Rik	0.307263	0.458724	-0.237655	15.6378	18.4381
1700123K08Rik_CCDS51680.1_ex2_5:138562924-138562946:-_5-4	GCTGTTTTGAGTCAGTTCA	1700123K08Rik	0.361782	0.490778	-0.190377	9.55749	10.9057
1700123K08Rik_CCDS51680.1_ex4_5:138564279-138564301:+_5-5	ACTCTTGTAGTTGAACTGG	1700123K08Rik	0.162466	0.35603	0.399081	12.5101	9.4869
1700123O20Rik_CCDS27099.1_ex0_14:54689898-54689920:-_5-1	GGGAAGTGATGTAAGACAT	1700123O20Rik	0.047684	0.196649	0.943872	7.58076	3.94075
1700123O20Rik_CCDS27099.1_ex0_14:54689950-54689972:-_5-2	CGCTGGGGACCTGACCAAC	1700123O20Rik	0.432856	0.523559	0.0788533	19.9916	18.9283
1700123O20Rik_CCDS27099.1_ex0_14:54689990-54690012:-_5-4	CGGCACTGCCTTAGCGACC	1700123O20Rik	0.127083	0.314634	0.362275	26.122	20.3213
1700123O20Rik_CCDS27099.1_ex0_14:54690075-54690097:-_5-5	GCTGACACTCAAAGATACA	1700123O20Rik	0.0189882	0.117173	-2.12217	1	4.35349
1700125H20Rik_CCDS48872.1_ex1_11:85172887-85172909:+_5-1	GCTCTGGTCCGTCATGCCA	1700125H20Rik	0.129068	0.317498	-0.296145	31.1514	38.2495
1700125H20Rik_CCDS48872.1_ex2_11:85173183-85173205:+_5-2	TCAGTGTAAAGAATACCTG	1700125H20Rik	0.129744	0.318237	-1.1937	1.92581	4.40508
1700125H20Rik_CCDS48872.1_ex2_11:85173294-85173316:-_5-3	GTGTTAATATGGCCCCCTA	1700125H20Rik	0.334041	0.475713	0.244917	11.0588	9.33213
1700125H20Rik_CCDS48872.1_ex2_11:85173315-85173337:-_5-4	CGGCAATAATGCTGCAGAA	1700125H20Rik	0.0493605	0.20045	0.682537	14.8121	9.22894
1700125H20Rik_CCDS48872.1_ex2_11:85173334-85173356:-_5-5	GTGCTTGATCTCCCAGGCT	1700125H20Rik	0.405112	0.512165	-0.143545	11.8345	13.0726
1700129C05Rik_CCDS27166.1_ex3_14:59142141-59142163:-_5-1	TAGACCCAGAGCTTAAAAT	1700129C05Rik	0.264241	0.430654	-1.09425	1	2.13503
1700129C05Rik_CCDS27166.1_ex4_14:59142470-59142492:+_5-2	AAGTAGCTAGTTTCCAGAT	1700129C05Rik	0.410894	0.514227	0.226556	6.0294	5.15317
1700129C05Rik_CCDS27166.1_ex4_14:59142590-59142612:+_5-3	GAGGAAAGTTTGTTTACAC	1700129C05Rik	0.23382	0.421328	0.519977	7.13036	4.97259
1700129C05Rik_CCDS27166.1_ex4_14:59142620-59142642:+_5-4	GGCATAGCAATCATTAAGG	1700129C05Rik	0.0958779	0.273386	-0.895225	3.8525	7.16526
1700129C05Rik_CCDS27166.1_ex4_14:59142692-59142714:+_5-5	AAAAGAGGGTTGGTACGAA	1700129C05Rik	0.242445	0.428343	0.438235	5.65407	4.17292
1810009A15Rik_CCDS29555.1_ex1_19:8889158-8889180:+_5-1	ATTAAGCAGGGATCGGCGA	1810009A15Rik	0.210935	0.402135	0.302364	14.5619	11.8085
1810009A15Rik_CCDS29555.1_ex1_19:8889176-8889198:+_5-2	ACGGAAACGCCAGGTGGTC	1810009A15Rik	0.0639172	0.230376	-0.506421	17.8648	25.3773
1810009A15Rik_CCDS29555.1_ex1_19:8889193-8889215:+_5-3	TCGGGGCTGTGATAGACGA	1810009A15Rik	0.327517	0.471886	0.310715	9.20718	7.42322
1810009A15Rik_CCDS29555.1_ex1_19:8889231-8889253:-_5-4	GTACGCCCGCTTCTTGAGG	1810009A15Rik	0.0187088	0.117173	0.636494	29.4249	18.9283
1810009A15Rik_CCDS29555.1_ex2_19:8890005-8890027:-_5-5	GTGATGTTGGCACGAGCAC	1810009A15Rik	0.47296	0.539202	0.052931	26.2721	25.3257
Gm2663_CCDS51756.1_ex3_6:40998021-40998043:-_5-5	AAGCATTCGGTTCCTTACC	Gm2663	0.0586519	0.220222	0.779375	12.2098	7.11367
1810009J06Rik_CCDS20042.1_ex1_6:40966215-40966237:+_5-1	AAGCATTCGGTTCCTTACC	1810009J06Rik	0.0586519	0.220222	0.779375	12.2098	7.11367
1810009J06Rik_CCDS20042.1_ex1_6:40966252-40966274:+_5-2	GCATTAGCCATCAGTGTGG	1810009J06Rik	0.009148	0.0793942	-0.755956	14.737	24.8872
Gm2663_CCDS51756.1_ex3_6:40997984-40998006:-_5-4	GCATTAGCCATCAGTGTGG	Gm2663	0.009148	0.0793942	-0.755956	14.737	24.8872
1810009J06Rik_CCDS20042.1_ex2_6:40966613-40966635:-_5-3	GTGTTCACCAAGGCGAACC	1810009J06Rik	0.0219417	0.127572	-0.925955	6.07944	11.5506
Gm2663_CCDS51756.1_ex2_6:40997623-40997645:+_5-2	GTGTTCACCAAGGCGAACC	Gm2663	0.0219417	0.127572	-0.925955	6.07944	11.5506
1810009J06Rik_CCDS20042.1_ex2_6:40966646-40966668:-_5-4	AAATTGCTCACCACCCTCA	1810009J06Rik	0.0714607	0.244192	0.619382	16.2383	10.5703
1810009J06Rik_CCDS20042.1_ex2_6:40966688-40966710:+_5-5	CGACACCCAGACTATAACA	1810009J06Rik	0.472414	0.539119	-0.123199	11.4341	12.4535
Gm2663_CCDS51756.1_ex2_6:40997548-40997570:-_5-1	CGACACCCAGACTATAACA	Gm2663	0.472414	0.539119	-0.123199	11.4341	12.4535
1810011H11Rik_CCDS49438.1_ex1_14:32805159-32805181:-_5-1	TACCTATCTCAGTCTCAGC	1810011H11Rik	0.245227	0.430626	0.256892	17.8397	14.9299
1810011H11Rik_CCDS49438.1_ex2_14:32806779-32806801:+_5-2	ATTTCAAATATGCCATCAT	1810011H11Rik	0.0588862	0.220778	-1.12026	2.72651	5.92705
1810011H11Rik_CCDS49438.1_ex2_14:32806791-32806813:+_5-3	CCATCATTGGTATGGCAGT	1810011H11Rik	0.0513523	0.204561	-0.791755	6.95521	12.0407
1810011H11Rik_CCDS49438.1_ex2_14:32806809-32806831:+_5-4	TGGGAGTAGCCATATCTGC	1810011H11Rik	0.0433926	0.186942	0.620896	17.5645	11.4216
1810011H11Rik_CCDS49438.1_ex2_14:32806840-32806862:-_5-5	CGGATCATGCAGATCTTCA	1810011H11Rik	0.22409	0.413563	-0.359599	6.62993	8.50665
1810011O10Rik_CCDS22194.1_ex0_8:24438669-24438691:+_5-1	TCCTCCAAATCTTGGTCGA	1810011O10Rik	0.469451	0.537642	-0.117366	11.4091	12.3761
1810011O10Rik_CCDS22194.1_ex0_8:24438734-24438756:+_5-2	GTTCCTGAAGAGCCTCTGC	1810011O10Rik	0.109326	0.291892	0.420308	20.8424	15.5748
1810011O10Rik_CCDS22194.1_ex0_8:24438761-24438783:-_5-3	ATCTTTGAGAACATAGACC	1810011O10Rik	0.43573	0.524752	-0.0578181	15.0373	15.6522
1810011O10Rik_CCDS22194.1_ex0_8:24438788-24438810:-_5-4	GCCGCTCGCAAGAAAGCTG	1810011O10Rik	0.11674	0.301809	-0.377924	17.4644	22.6945
1810011O10Rik_CCDS22194.1_ex0_8:24438800-24438822:+_5-5	GCGAGCGGCTGTGTCGAAG	1810011O10Rik	0.539924	0.573489	-0.0468519	9.98286	10.3124
1810013L24Rik_CCDS49756.1_ex0_16:8830602-8830624:-_5-1	TTGTGCTCGGGCTGCGCGG	1810013L24Rik	0.0112814	0.0897243	-0.728052	15.7879	26.1512
1810013L24Rik_CCDS49756.1_ex0_16:8830664-8830686:+_5-2	CCGTGGCTCAGCTCTACAA	1810013L24Rik	0.0539821	0.210153	-0.846911	5.50394	9.89964
1810013L24Rik_CCDS49756.1_ex1_16:8831378-8831400:-_5-3	TTATAGAGGTTGGTGACGG	1810013L24Rik	0.0133397	0.0989104	1.31183	7.60578	3.06368
1810013L24Rik_CCDS49756.1_ex2_16:8842994-8843016:+_5-4	TTGATATTGGAATTCAGAT	1810013L24Rik	0.632121	0.63387	0	1	1
1810013L24Rik_CCDS49756.1_ex2_16:8843014-8843036:+_5-5	GGCTATCAGCGACGCAATA	1810013L24Rik	0.318074	0.465543	-0.282639	3.72739	4.53406
1810019J16Rik_CCDS38905.1_ex0_4:133528083-133528105:+_5-1	ACCGGGCCGTCGCACCAGG	1810019J16Rik	0.0111275	0.0890497	0.45132	62.1035	45.4208
1810019J16Rik_CCDS38905.1_ex0_4:133528332-133528354:+_5-2	AGGGTCTGCCGAAGCCGCC	1810019J16Rik	0.366049	0.493266	0.102302	21.593	20.1149
1810019J16Rik_CCDS38905.1_ex0_4:133528390-133528412:+_5-3	CGTGCACCCCCCAGCCGCC	1810019J16Rik	0.0423592	0.184329	-0.637426	12.1848	18.9541
1810019J16Rik_CCDS38905.1_ex0_4:133528481-133528503:-_5-4	CATGGCGGTAGGGGTAGAC	1810019J16Rik	0.0286195	0.148259	0.800894	16.2133	9.30633
1810019J16Rik_CCDS38905.1_ex0_4:133528562-133528584:-_5-5	TAGGCAAGCTGTGCCGCGT	1810019J16Rik	0.424158	0.51993	0.196929	9.30727	8.11971
1810024B03Rik_CCDS50702.1_ex0_2:127186986-127187008:-_5-1	TTTGGCATAAGCAAAAGAC	1810024B03Rik	0.403474	0.511445	-0.361939	3.22695	4.14712
1810024B03Rik_CCDS50702.1_ex0_2:127187022-127187044:+_5-2	ATGGCCATCCCAATCCAAT	1810024B03Rik	0.239177	0.425669	-0.525747	4.15276	5.97864
1810024B03Rik_CCDS50702.1_ex0_2:127187104-127187126:+_5-3	AAAGAGAGTTCTGAAAACA	1810024B03Rik	0.0390156	0.176448	1.58632	3.77743	1.25796
1810024B03Rik_CCDS50702.1_ex0_2:127187139-127187161:-_5-4	AAGCGTCGGCCTCTAGATG	1810024B03Rik	0.227223	0.415999	-0.258171	16.5386	19.7795
1810024B03Rik_CCDS50702.1_ex0_2:127187183-127187205:-_5-5	TGATGGAATATGCATCCCG	1810024B03Rik	0.353413	0.486341	-0.255356	10.4333	12.4535
1810026J23Rik_CCDS22908.1_ex1_9:21593228-21593250:+_5-1	CCGCGCGGCCCTGTACGTG	1810026J23Rik	0.00921117	0.0797422	-1.2607	4.07769	9.77066
1810026J23Rik_CCDS22908.1_ex1_9:21593277-21593299:+_5-2	GCGCTGGCGCCCAGTGAGG	1810026J23Rik	0.0868384	0.259643	-1.09605	2.32616	4.97259
1810026J23Rik_CCDS22908.1_ex1_9:21593312-21593334:-_5-3	GACCCCGATGCGTCCAGCA	1810026J23Rik	0.21528	0.405836	-0.566366	4.00263	5.92705
1810026J23Rik_CCDS22908.1_ex1_9:21593355-21593377:+_5-4	ACGCGCAACCGCCACTCGG	1810026J23Rik	0.000510215	0.0140699	-2.03136	2.22607	9.09996
1810026J23Rik_CCDS22908.1_ex1_9:21593415-21593437:+_5-5	CGGCTGCGTCACGTGAACC	1810026J23Rik	0.306736	0.458281	-0.269034	5.4539	6.57195
1810030O07Rik_CCDS30024.1_ex2_X:12664572-12664594:+_5-1	ATCTGAAAATCTCGAAGCC	1810030O07Rik	0.0339638	0.163156	0.819899	12.7853	7.24265
1810030O07Rik_CCDS30024.1_ex2_X:12664590-12664612:-_5-2	GATGAAAGTTTCATCTACC	1810030O07Rik	0.225212	0.414695	0.671512	3.8525	2.41878
1810030O07Rik_CCDS30024.1_ex3_X:12669535-12669557:-_5-3	TTTGTGGTTGACCGGAAGA	1810030O07Rik	0.00468196	0.0530055	-0.966251	9.58251	18.7219
1810030O07Rik_CCDS30024.1_ex4_X:12673090-12673112:-_5-4	GGCATCACATCAACAGAAA	1810030O07Rik	0.192836	0.385784	-0.457421	8.95696	12.2987
1810030O07Rik_CCDS30024.1_ex5_X:12673353-12673375:+_5-5	CCGCCGCGGCAGGTAGCAT	1810030O07Rik	0.0239748	0.133806	-0.970876	6.88015	13.4853
1810033B17Rik_CCDS22069.1_ex1_8:3666065-3666087:+_5-1	GACTACGAGAATATAACCT	1810033B17Rik	0.566475	0.593806	-0.132366	1.90079	2.08343
1810033B17Rik_CCDS22069.1_ex2_8:3667039-3667061:-_5-2	GTTCTGTACAACCAAGGCG	1810033B17Rik	0.254703	0.430654	0.29593	10.6334	8.66143
1810033B17Rik_CCDS22069.1_ex2_8:3667060-3667082:-_5-3	AGAACATACAACATCATAA	1810033B17Rik	0.264241	0.430654	0.90748	1.87577	1
1810033B17Rik_CCDS22069.1_ex3_8:3667289-3667311:+_5-4	TGAAAGCAGAGCTTTCGAA	1810033B17Rik	0.505446	0.553071	0.06393	8.05617	7.70698
1810033B17Rik_CCDS22069.1_ex4_8:3667393-3667415:-_5-5	CACACCGTGTCTGAAACTA	1810033B17Rik	0.000239749	0.00849336	-1.74967	3.42712	11.5248
1810037I17Rik_CCDS38619.1_ex0_3:122924525-122924547:+_4-1	GGAAGGAGGAACCAAGATG	1810037I17Rik	0.184806	0.3786	-0.689761	3.80245	6.13342
1810037I17Rik_CCDS38619.1_ex0_3:122924538-122924560:+_4-2	AAGATGAGGCACCTCAGTC	1810037I17Rik	0.0188587	0.117173	1.31416	8.13124	3.27005
1810037I17Rik_CCDS38619.1_ex0_3:122924557-122924579:-_4-3	TTCGGAAGCCCGTTCATCC	1810037I17Rik	0.234529	0.422124	0.312681	10.5333	8.48086
1810037I17Rik_CCDS38619.1_ex0_3:122924573-122924595:+_4-4	CCGAAACACTCCTACTGGC	1810037I17Rik	0.0213406	0.125509	0.691563	24.4455	15.1362
1810041L15Rik_CCDS49687.1_ex1_15:84406630-84406652:+_5-1	CTGGATCCCCCACCGAGTG	1810041L15Rik	0.02404	0.133999	0.623351	23.5948	15.3168
1810041L15Rik_CCDS49687.1_ex1_15:84406661-84406683:+_5-2	CAAATATCGTAGTTCATGG	1810041L15Rik	0.0365713	0.17031	0.749196	14.8621	8.842
1810041L15Rik_CCDS49687.1_ex2_15:84417149-84417171:-_5-3	TGCAACGAGACGGAGTTCC	1810041L15Rik	0.234108	0.421652	0.601809	6.2546	4.12132
1810041L15Rik_CCDS49687.1_ex2_15:84417217-84417239:+_5-4	TTTTGTTGTCCGAGAGCCG	1810041L15Rik	0.544243	0.576591	0.00641248	11.0838	11.0347
1810041L15Rik_CCDS49687.1_ex2_15:84417265-84417287:-_5-5	AGCCTTACACGGATCACAA	1810041L15Rik	0.465128	0.53603	-0.0404525	12.3599	12.7114
1810043G02Rik_CCDS35954.1_ex2_10:77980526-77980548:+_5-1	CCTAGAGGTAATCACACTC	1810043G02Rik	0.274643	0.437703	0.233592	13.611	11.5764
1810043G02Rik_CCDS35954.1_ex3_10:77981598-77981620:-_5-2	CTGCGCACCGGTTCCAGGG	1810043G02Rik	0.0910925	0.266436	-0.456753	14.3367	19.6763
1810043G02Rik_CCDS35954.1_ex3_10:77981663-77981685:-_5-3	AGAACAGCTCGTTCAGACT	1810043G02Rik	0.000144511	0.00601649	-2.10878	2.30114	9.92544
1810043G02Rik_CCDS35954.1_ex3_10:77981755-77981777:-_5-4	CAGCACGGTCATGCGGTAA	1810043G02Rik	0.0729385	0.246794	-0.517128	13.9113	19.9085
1810043G02Rik_CCDS35954.1_ex4_10:77982886-77982908:+_5-5	CTGACCCGCGCGCTGATGG	1810043G02Rik	0.471444	0.53876	0.036696	39.2084	38.2237
1810043H04Rik_CCDS36388.1_ex1_11:120099153-120099175:+_5-1	GCTTATGGCAAGTGCGTGC	1810043H04Rik	0.0114875	0.0907319	0.934923	14.5368	7.60379
1810043H04Rik_CCDS36388.1_ex1_11:120099169-120099191:+_5-2	TGCAGGCGTCCACCGCCCC	1810043H04Rik	0.169501	0.36315	-0.420592	8.70674	11.6538
1810043H04Rik_CCDS36388.1_ex1_11:120099186-120099208:+_5-3	CCAGGAGGCCGCCTGAGTA	1810043H04Rik	0.322744	0.468691	0.200605	18.165	15.8069
1810043H04Rik_CCDS36388.1_ex1_11:120099198-120099220:-_5-4	AACGCAGAGGTCCTTACTC	1810043H04Rik	0.38434	0.502456	0.487222	4.40298	3.14107
1810043H04Rik_CCDS36388.1_ex1_11:120099210-120099232:-_5-5	CTCGAACTCGCGAACGCAG	1810043H04Rik	0.00527801	0.0568842	-1.27414	4.97848	12.0407
1810046K07Rik_CCDS52792.1_ex1_9:51291552-51291574:+_5-1	GAAATGAGTTGGGTCACTG	1810046K07Rik	0.296692	0.452128	0.23019	10.5834	9.02258
1810046K07Rik_CCDS52792.1_ex1_9:51291669-51291691:+_5-2	AGCCAGGTAGGATTCCAGC	1810046K07Rik	0.00050234	0.0139594	-1.06811	11.7344	24.6034
1810046K07Rik_CCDS52792.1_ex1_9:51291703-51291725:+_5-3	TGCCCAGCCGTGGACTCGC	1810046K07Rik	0.00662232	0.0650639	0.647953	37.0566	23.6489
1810046K07Rik_CCDS52792.1_ex1_9:51291724-51291746:+_5-4	GCAAAGGGCTTGCTCATGC	1810046K07Rik	0.371887	0.496263	-0.184203	14.4117	16.3745
1810046K07Rik_CCDS52792.1_ex1_9:51291743-51291765:-_5-5	CGAATGACCTCTACACCTC	1810046K07Rik	0.0796775	0.250219	0.536628	17.9899	12.4019
1810055G02Rik_CCDS50342.1_ex1_19:3716522-3716544:+_5-1	GTAAATCAAAGCATGCTGA	1810055G02Rik	0.099189	0.277887	-0.902077	2.42625	4.53406
1810055G02Rik_CCDS50342.1_ex1_19:3716898-3716920:+_5-2	ACACGGCGACTCTTGCTGC	1810055G02Rik	0.410133	0.514227	0.0827837	36.3559	34.3285
1810055G02Rik_CCDS50342.1_ex1_19:3717009-3717031:+_5-3	CCTCAGGTGCCCAAATACA	1810055G02Rik	0.418218	0.517212	0.143201	7.856	7.11367
1810055G02Rik_CCDS50342.1_ex1_19:3717165-3717187:-_5-4	TCAGGCTGGTAGCACGCGC	1810055G02Rik	0.169369	0.362997	-0.367953	11.309	14.5945
1810055G02Rik_CCDS50342.1_ex1_19:3717224-3717246:+_5-5	AGCCCTACATTACCTACCC	1810055G02Rik	0.0315735	0.156477	-1.01143	5.70412	11.499
1810062G17Rik_CCDS57208.1_ex0_3:36476229-36476251:-_5-1	ATCTTAGTCACCTTGCACC	1810062G17Rik	0.0103479	0.0855031	-0.529873	32.6027	47.0718
1810062G17Rik_CCDS57208.1_ex1_3:36479487-36479509:+_5-2	CCGACCTCCTGCATACGCA	1810062G17Rik	4.92e-05	0.00303924	-1.46524	7.6308	21.0693
1810062G17Rik_CCDS57208.1_ex1_3:36479522-36479544:-_5-3	ATGTGGCTGGAGAAGCAAA	1810062G17Rik	0.431643	0.522907	0.257574	7.45565	6.2366
1810062G17Rik_CCDS57208.1_ex1_3:36479538-36479560:-_5-4	TGATAAGAAATTGCTCATG	1810062G17Rik	0.00269619	0.0392067	1.83412	8.25635	2.3156
1810062G17Rik_CCDS57208.1_ex2_3:36481809-36481831:-_5-5	TGGGCCTTTTATACCCTGG	1810062G17Rik	0.0189724	0.117173	0.814049	19.4912	11.0863
1810065E05Rik_CCDS24730.1_ex1_11:58422244-58422266:-_5-1	GAGGTATTGCATGTACCCA	1810065E05Rik	0.0826441	0.253527	-0.561852	11.6343	17.1741
1810065E05Rik_CCDS24730.1_ex2_11:58422772-58422794:+_5-2	CTAGATGAATGTACTGGAC	1810065E05Rik	0.0769781	0.250219	0.782092	7.53071	4.37928
1810065E05Rik_CCDS24730.1_ex2_11:58422791-58422813:+_5-3	TGGCATTCTCGGCGACACT	1810065E05Rik	0.432527	0.523559	0.0438459	22.5439	21.869
1810065E05Rik_CCDS24730.1_ex2_11:58422853-58422875:+_5-4	ACTGATAAGTGCAATCAAG	1810065E05Rik	0.471669	0.538825	0.0671552	7.83098	7.47481
1810065E05Rik_CCDS24730.1_ex3_11:58423853-58423875:+_5-5	TTGCCTGCTATATGGAGGC	1810065E05Rik	0.153215	0.345533	-0.655994	6.00438	9.46111
2010001E11Rik_CCDS48539.1_ex0_10:39921990-39922012:-_4-2	AATCCTCCAACGCCACCAC	2010001E11Rik	0.290367	0.44798	-0.16393	20.1418	22.5655
2010001E11Rik_CCDS48539.1_ex0_10:39922027-39922049:+_4-3	GTCAAGGTCGGACTCGGTG	2010001E11Rik	0.150565	0.342566	0.558806	8.80683	5.97864
2010001E11Rik_CCDS48539.1_ex0_10:39922163-39922185:-_4-4	CGTCCTCATCTTGGATCTC	2010001E11Rik	0.00594478	0.0610027	1.03664	17.2392	8.40347
2010002M12Rik_CCDS29765.1_ex0_19:34619296-34619318:-_5-1	ATGAAAAAAGCTACAAGCA	2010002M12Rik	0.00738388	0.0696766	1.94992	6.45477	1.6707
2010002M12Rik_CCDS29765.1_ex0_19:34619386-34619408:-_5-2	GGGTTCCTTAAAAAAGCCT	2010002M12Rik	0.37327	0.49708	-0.783543	1.30026	2.23821
2010002M12Rik_CCDS29765.1_ex0_19:34619596-34619618:-_5-3	TCTCTACAACCCTTAAAGA	2010002M12Rik	0.632121	0.63387	-0.55024	1	1.46433
2010002M12Rik_CCDS29765.1_ex0_19:34619735-34619757:+_5-5	TGTGAGCCACACTTCCGCA	2010002M12Rik	0.452464	0.531567	0.0663265	26.2471	25.0677
2010003K11Rik_CCDS29429.1_ex1_19:4498249-4498271:+_5-1	GTACTGTCTCAGCCACCGC	2010003K11Rik	0.181397	0.375157	-0.374204	11.4592	14.8525
2010003K11Rik_CCDS29429.1_ex1_19:4498278-4498300:-_5-2	TGATCCAAGGCCAGAGAGG	2010003K11Rik	0.552251	0.582272	-0.0236018	3.92756	3.99234
2010003K11Rik_CCDS29429.1_ex1_19:4498360-4498382:-_5-3	TCGCAGGTCCCCGATGGCA	2010003K11Rik	1.81e-05	0.00152461	-1.58772	6.55486	19.7021
2010003K11Rik_CCDS29429.1_ex1_19:4498375-4498397:-_5-4	CGTGAGAAGTCCAGGTCGC	2010003K11Rik	0.0289097	0.148778	0.569972	25.5715	17.2257
2010003K11Rik_CCDS29429.1_ex1_19:4498387-4498409:+_5-5	CTTCTCACGGCCCAGTCTG	2010003K11Rik	0.409442	0.513932	0.077066	25.8718	24.526
2010012O05Rik_CCDS38011.1_ex0_19:46690037-46690059:+_5-1	GTAATCGCGCTCACCAAGC	2010012O05Rik	0.115226	0.299741	-0.468299	13.9613	19.3152
2010012O05Rik_CCDS38011.1_ex0_19:46690064-46690086:+_5-2	AAAGGCTCGCGGAGCTCCG	2010012O05Rik	0.0240309	0.133999	-1.21198	3.42712	7.93914
2010012O05Rik_CCDS38011.1_ex1_19:46699542-46699564:+_5-3	TTTTGTTTTCTAGCTGCTG	2010012O05Rik	0.0853105	0.257521	0.438758	22.719	16.7614
2010012O05Rik_CCDS38011.1_ex1_19:46699561-46699583:+_5-4	GGGCAGGCAGCTCGAAACA	2010012O05Rik	0.0885568	0.262836	-0.662985	6.85512	10.8541
2010012O05Rik_CCDS38011.1_ex1_19:46699599-46699621:-_5-5	ACATCTTCCGAGTGTAAGA	2010012O05Rik	7.73e-05	0.00412802	1.64218	15.7629	5.04998
2010015L04Rik_CCDS51402.1_ex1_4:155418621-155418643:+_5-1	AGAGTCCAGTTGGAGGATC	2010015L04Rik	0.274969	0.437775	-0.641362	3.50219	5.46272
2010015L04Rik_CCDS51402.1_ex1_4:155418661-155418683:-_5-2	CATCCTCTAGTCCCTCAGA	2010015L04Rik	0.46791	0.537425	0.0273205	14.6369	14.3624
2010015L04Rik_CCDS51402.1_ex2_4:155418864-155418886:+_5-3	CAAGGGTGCCGAGAAAATG	2010015L04Rik	0.0356421	0.168095	1.04097	7.6308	3.70859
2010015L04Rik_CCDS51402.1_ex2_4:155418910-155418932:-_5-4	CTTCCGAAGATGAAACGCC	2010015L04Rik	0.0607475	0.224398	-0.780248	5.62905	9.66748
2010015L04Rik_CCDS51402.1_ex2_4:155418940-155418962:-_5-5	CTCATGCATCTTGTCTAGA	2010015L04Rik	0.586335	0.610828	-0.0770188	4.10272	4.32769
2010106E10Rik_CCDS30360.1_ex1_X:112497932-112497954:-_5-1	ATGCACAAACAATAGACTC	2010106E10Rik	0.616107	0.63387	0.095537	2.22607	2.08343
2010106E10Rik_CCDS30360.1_ex2_X:112512394-112512416:+_5-2	TCCAAATTTCAGAGGCCAA	2010106E10Rik	0.0756195	0.250219	-0.54193	12.3099	17.9222
2010106E10Rik_CCDS30360.1_ex2_X:112512410-112512432:-_5-3	GTACCAGTAGTCTCCCCAT	2010106E10Rik	0.108482	0.290833	-0.587726	6.32966	9.5127
2010106E10Rik_CCDS30360.1_ex2_X:112512436-112512458:+_5-4	GGAGAAATGTGATCAACTC	2010106E10Rik	0.0609638	0.224796	-1.16854	2.75153	6.18501
2010106E10Rik_CCDS30360.1_ex2_X:112512539-112512561:-_5-5	TGACTTCCCTTTACAGTAA	2010106E10Rik	0.489451	0.545372	0.484347	2.30114	1.6449
2010107E04Rik_CCDS36566.1_ex2_12:111963225-111963247:-_3-1	TAAAATCAGGAGTGCTGGT	2010107E04Rik	0.0174424	0.115686	0.816384	19.341	10.9831
2010107E04Rik_CCDS36566.1_ex2_12:111963237-111963259:-_3-2	CCTCATCGTATATAAAATC	2010107E04Rik	0.39962	0.509524	-0.581213	1.37533	2.05764
2010107E04Rik_CCDS36566.1_ex2_12:111963267-111963289:-_3-3	GGAAATTTGGGTAGGAGTG	2010107E04Rik	0.463163	0.535746	-0.144926	5.4539	6.03023
2010107G12Rik_CCDS19998.1_ex2_6:34955041-34955063:+_5-1	CATATGCCGTGGGGGACTC	2010107G12Rik	0.516427	0.558989	0.0579124	14.3867	13.8206
2010107G12Rik_CCDS19998.1_ex4_6:34956914-34956936:+_5-2	TGCAGAATCAAAGAGAGGC	2010107G12Rik	0.105311	0.286178	0.790763	8.15626	4.71463
2010107G12Rik_CCDS19998.1_ex4_6:34956949-34956971:+_5-3	TGGTCGGCGCGATGGTCAA	2010107G12Rik	0.00570296	0.0594888	0.973896	19.1909	9.77066
2010107G12Rik_CCDS19998.1_ex4_6:34957011-34957033:+_5-4	CCCACTAGCATCTGGACAC	2010107G12Rik	0.210093	0.401184	-0.397083	7.38058	9.71907
2010107G12Rik_CCDS19998.1_ex4_6:34957040-34957062:+_5-5	CATGATAGCGCCCTGCAGC	2010107G12Rik	0.0723984	0.246023	0.630322	13.8863	8.97098
2010107G23Rik_CCDS23886.1_ex0_10:62108949-62108971:+_5-1	GGTCACAGGTTCCACCACG	2010107G23Rik	0.540715	0.574147	-0.03386	15.0623	15.42
2010107G23Rik_CCDS23886.1_ex0_10:62108964-62108986:-_5-2	TGGCACCTTGGGAACCACG	2010107G23Rik	0.29504	0.451211	-0.322612	5.37883	6.72673
2010107G23Rik_CCDS23886.1_ex0_10:62109013-62109035:-_5-3	TCCTTTCAGTGACCTGAAC	2010107G23Rik	0.217744	0.408129	0.396369	10.9587	8.32608
2010107G23Rik_CCDS23886.1_ex0_10:62109034-62109056:+_5-4	GATTGGGCAGCACCCAGTC	2010107G23Rik	0.385438	0.503127	-0.158902	17.4394	19.47
2010107G23Rik_CCDS23886.1_ex0_10:62109087-62109109:-_5-5	GGCCACGGCGCACCTCCAG	2010107G23Rik	0.148348	0.340389	0.291671	29.8002	24.3454
2010109A12Rik_CCDS57357.1_ex1_5:93208135-93208157:+_5-1	CACAACTATTGTGACACCG	2010109A12Rik	0.301875	0.455374	-0.407127	4.52809	6.00444
2010109A12Rik_CCDS57357.1_ex1_5:93208152-93208174:-_5-2	AGAGGCAGAAACGATTCCA	2010109A12Rik	0.15257	0.345046	-0.686333	2.80158	4.50826
2010109A12Rik_CCDS57357.1_ex1_5:93208173-93208195:+_5-3	CATTTCTTCAAGGAAGACT	2010109A12Rik	0.264241	0.430654	-1.28959	1	2.44458
2010109A12Rik_CCDS57357.1_ex2_5:93213249-93213271:-_5-4	ATATCCAACATTATCTTCA	2010109A12Rik	0.253456	0.430654	-0.588927	2.55136	3.83757
2010109A12Rik_CCDS57357.1_ex2_5:93213281-93213303:+_5-5	AAATAGCATCAGAGATATG	2010109A12Rik	0.632121	0.63387	-0.575434	1	1.49013
2010109I03Rik_CCDS27537.1_ex0_15:74879965-74879987:+_5-1	ACATGATTAATGTCAGGGC	2010109I03Rik	0.0205482	0.122683	-1.00271	6.73001	13.4853
2010109I03Rik_CCDS27537.1_ex0_15:74880008-74880030:+_5-2	CAGTCGTTTGCTGACCTGG	2010109I03Rik	0.0132721	0.0986687	-0.788167	11.4091	19.7021
2010109I03Rik_CCDS27537.1_ex1_15:74880664-74880686:+_5-3	AGATACTCACTATACCAGT	2010109I03Rik	0.280727	0.441462	-0.684643	2.67647	4.3019
2010109I03Rik_CCDS27537.1_ex1_15:74880684-74880706:+_5-4	GGTCAAGCAGTAGAGGCTC	2010109I03Rik	0.000596426	0.0149405	-1.91941	2.27612	8.60984
2010109I03Rik_CCDS27537.1_ex1_15:74880735-74880757:-_5-5	CATGAATGCAGTGGTATAG	2010109I03Rik	0.318921	0.466118	0.366497	8.30639	6.44297
2010111I01Rik_CCDS36699.1_ex0_13:63015328-63015350:+_5-1	AACCAGTCGCGTTCTACCC	2010111I01Rik	0.277181	0.439152	-0.357088	8.85688	11.3442
2010111I01Rik_CCDS36699.1_ex0_13:63015778-63015800:+_5-2	TGCTACACTCGTTGCAGCC	2010111I01Rik	0.275964	0.438171	0.295608	16.4886	13.4337
2010111I01Rik_CCDS36699.1_ex0_13:63015834-63015856:+_5-3	CAATTGGAGCTTACGGATC	2010111I01Rik	0.491512	0.546098	-0.0514923	8.60666	8.91939
2010111I01Rik_CCDS36699.1_ex1_13:63033040-63033062:+_5-4	GGGATCCCCCATCAACAAC	2010111I01Rik	0.0102648	0.0851199	1.28888	10.133	4.14712
2010111I01Rik_CCDS36699.1_ex2_13:63061167-63061189:-_5-5	TCCGCTTCCGATGGCGAGA	2010111I01Rik	0.0417515	0.182904	0.791221	12.9354	7.47481
2010300C02Rik_CCDS48242.1_ex3_1:37625952-37625974:+_5-1	TCCCGCTGCCTAGCGTCCG	2010300C02Rik	0.366599	0.493455	0.115959	23.895	22.0496
2010300C02Rik_CCDS48242.1_ex3_1:37626020-37626042:+_5-2	CTCATCTAGGGTCCACGAC	2010300C02Rik	0.000814296	0.0183267	0.986553	26.8226	13.5369
2010300C02Rik_CCDS48242.1_ex5_1:37631335-37631357:+_5-3	TGGACCCACATCGTGCAGC	2010300C02Rik	0.433721	0.523963	-0.0961766	12.0847	12.9178
2010300C02Rik_CCDS48242.1_ex6_1:37631857-37631879:+_5-4	CACCCGCACGGGCCGAGCA	2010300C02Rik	0.00882436	0.0777409	-0.607632	24.1202	36.7533
2010300C02Rik_CCDS48242.1_ex7_1:37637890-37637912:-_5-5	CATTGCCGTTGAGGAGTCG	2010300C02Rik	0.00036403	0.0112604	-1.17147	10.8086	24.3454
2200002D01Rik_CCDS52172.1_ex0_7:29247716-29247738:+_5-1	GCAGCCAGCGGCATACTCC	2200002D01Rik	0.334348	0.47594	-0.268036	5.62905	6.77832
2200002D01Rik_CCDS52172.1_ex1_7:29247927-29247949:+_5-2	CTACTGCTGCTGGAGTCGG	2200002D01Rik	0.103523	0.284131	-0.342387	26.8726	34.0706
2200002D01Rik_CCDS52172.1_ex1_7:29247955-29247977:-_5-3	CCCCCATCTAGCGTGTCTC	2200002D01Rik	0.428226	0.521709	-0.0633533	21.8182	22.7977
2200002D01Rik_CCDS52172.1_ex2_7:29248128-29248150:-_5-4	AGGCGCTGCTCACAAGCCG	2200002D01Rik	0.121153	0.307378	0.474445	13.611	9.79646
2200002D01Rik_CCDS52172.1_ex2_7:29248158-29248180:-_5-5	TCCTCTTAAAGCGCCGGGC	2200002D01Rik	0.168291	0.361675	-0.383517	13.9363	18.1802
2200002J24Rik_CCDS21107.1_ex0_7:30699892-30699914:-_5-1	CAGAGGTAATCCTTCGCTG	2200002J24Rik	0.185758	0.379178	-0.445243	6.30464	8.58404
2200002J24Rik_CCDS21107.1_ex0_7:30699944-30699966:-_5-2	CAGGGCTGGAATCGCCAGC	2200002J24Rik	0.480101	0.542002	0.0896523	16.4635	15.4716
2200002J24Rik_CCDS21107.1_ex0_7:30699962-30699984:+_5-3	CTGCTGTTCTCCCTTAAGG	2200002J24Rik	0.298025	0.452811	0.242142	16.1633	13.6659
2200002J24Rik_CCDS21107.1_ex1_7:30700240-30700262:-_5-4	AGTTGGCTTCCCGGGTCTG	2200002J24Rik	0.481652	0.542436	-0.0093667	23.4446	23.5974
2200002J24Rik_CCDS21107.1_ex1_7:30700256-30700278:-_5-5	CTCCAATCTCCAACAGAGT	2200002J24Rik	0.518637	0.560209	-0.0994472	8.80683	9.43531
2210010C04Rik_CCDS20043.1_ex2_6:41032977-41032999:+_5-1	GACACCTAGTACCAGCTGA	2210010C04Rik	0.0193386	0.118581	0.637263	24.5456	15.7811
2210010C04Rik_CCDS20043.1_ex2_6:41033024-41033046:+_5-2	GACACTCGAGAGTTGAGGG	2210010C04Rik	0.264608	0.430867	0.231757	16.7138	14.2334
2210010C04Rik_CCDS20043.1_ex2_6:41033089-41033111:+_5-3	GTTTGCATTATAGTTGGGG	2210010C04Rik	0.329292	0.472968	-0.231964	13.9864	16.426
2210010C04Rik_CCDS20043.1_ex2_6:41033177-41033199:+_5-4	AGGCGCACCTGAATTCGGC	2210010C04Rik	0.100565	0.279852	-0.449928	14.5368	19.8569
2210010C04Rik_CCDS20043.1_ex3_6:41034240-41034262:+_5-5	TACGATTTGTAGCAGTGAG	2210010C04Rik	0.0387795	0.176044	-0.900561	5.17866	9.66748
2210016F16Rik_CCDS49282.1_ex2_13:58384347-58384369:+_5-1	TATATCCCGCACCTGCTCG	2210016F16Rik	0.0871346	0.260233	-0.360469	29.0495	37.2951
2210016F16Rik_CCDS49282.1_ex2_13:58384369-58384391:+_5-2	CTCACTGTGGCGTAGTAGG	2210016F16Rik	0.295609	0.45154	-0.286889	9.93282	12.1181
2210016F16Rik_CCDS49282.1_ex3_13:58384828-58384850:+_5-3	TCGAGCGCGCGGTTGACGG	2210016F16Rik	0.0555905	0.213522	-0.541351	15.9131	23.1588
2210016F16Rik_CCDS49282.1_ex3_13:58384868-58384890:-_5-4	ACGGCGGGACGCCCTACAC	2210016F16Rik	0.23926	0.425723	0.462932	9.30727	6.75252
2210016F16Rik_CCDS49282.1_ex3_13:58384983-58385005:-_5-5	CACGAGCTCAACCCGCGCG	2210016F16Rik	0.567206	0.594276	0.0223162	13.4859	13.2789
2210016L21Rik_CCDS19576.1_ex0_5:114942273-114942295:+_5-1	GAATTGGCACGCTGTCGCG	2210016L21Rik	0.0365893	0.17031	-0.570231	16.8138	24.9645
2210016L21Rik_CCDS19576.1_ex0_5:114942292-114942314:+_5-2	AGGCGGCTACGCCCGCCTG	2210016L21Rik	0.52988	0.566759	0.108062	6.30464	5.84966
2210016L21Rik_CCDS19576.1_ex0_5:114942339-114942361:+_5-3	GAGAGACCCGAAGCCGGTA	2210016L21Rik	0.0628923	0.228674	-0.700448	7.98111	12.9694
2210016L21Rik_CCDS19576.1_ex1_5:114945807-114945829:+_5-4	GACCCCGCAGCCAAGCCGC	2210016L21Rik	0.448639	0.530137	-0.115427	11.234	12.1697
2210016L21Rik_CCDS19576.1_ex4_5:114947189-114947211:-_5-5	CTTCCTTCTTATGGCCTCC	2210016L21Rik	0.227967	0.416724	-0.272626	13.8112	16.684
2210018M11Rik_CCDS40028.1_ex10_7:98621375-98621397:+_5-2	GCTTGTAGAACTTACCGGT	2210018M11Rik	0.137814	0.328013	0.576345	11.1839	7.50061
2210018M11Rik_CCDS40028.1_ex12_7:98630144-98630166:+_5-3	GACATGACCACGGACGGTG	2210018M11Rik	0.0946303	0.271452	0.502661	19.2159	13.5627
2210018M11Rik_CCDS40028.1_ex12_7:98630257-98630279:-_5-4	GTTGTTATAACTGCGTCCC	2210018M11Rik	0.00234973	0.0360204	1.09778	17.7647	8.30029
2210018M11Rik_CCDS40028.1_ex14_7:98641627-98641649:-_5-5	CTTCAGAGTGGTCCATCGA	2210018M11Rik	0.000873972	0.0191265	0.662614	53.6461	33.89
2210018M11Rik_CCDS40028.1_ex9_7:98619413-98619435:+_5-1	AGCCACACGACCTAAGGAT	2210018M11Rik	0.261579	0.430654	0.303542	16.3885	13.2789
2210404J11Rik_CCDS28410.1_ex1_17:15059423-15059445:+_6-2	GGAGTGCCTGTGCTATAAA	2210404J11Rik	0.137314	0.327442	-0.834625	2.70149	4.81782
2210404J11Rik_CCDS28410.1_ex2_17:15059836-15059858:+_6-3	AAGTTCTAGTTGTGCTCCG	2210404J11Rik	0.494137	0.547387	-0.0824766	14.6119	15.4716
2210404J11Rik_CCDS28410.1_ex2_17:15059871-15059893:+_6-4	TGCCAACGCGTATCTGACC	2210404J11Rik	0.00271678	0.0394362	0.864313	26.8977	14.7751
2210404J11Rik_CCDS28410.1_ex2_17:15059889-15059911:-_6-5	CTGCAAAGAGGCGGTGACC	2210404J11Rik	8.73e-05	0.00434857	2.27499	10.4583	2.16082
2210404J11Rik_CCDS28410.1_ex2_17:15059910-15059932:+_6-6	CTAAGACACAGGCAATGGG	2210404J11Rik	0.00522727	0.0566011	0.712121	31.7269	19.3668
2210404J11Rik_CCDS37451.1_ex12_17:15056776-15056798:+_6-1	TAGGCTTGCAGAAGGATAC	2210404J11Rik	0.0149339	0.105793	-1.54998	2.52634	7.39742
2210404O07Rik_CCDS35998.1_ex1_10:81393800-81393822:+_5-1	AAGCCTTGGCTAGTAGGCC	2210404O07Rik	0.0450386	0.19079	-0.737853	9.10709	15.1878
2210404O07Rik_CCDS35998.1_ex1_10:81393818-81393840:-_5-2	GAAGCCCACTACTGCAGCC	2210404O07Rik	0.186034	0.379406	-0.277846	19.5913	23.7521
2210404O07Rik_CCDS35998.1_ex1_10:81393868-81393890:-_5-4	TTGGCGCACCAGACACGAT	2210404O07Rik	0.461493	0.535218	-0.182367	7.40561	8.40347
2210404O07Rik_CCDS35998.1_ex2_10:81394097-81394119:+_5-5	GAGGAGGCTACATTCAGAA	2210404O07Rik	0.0496587	0.200874	0.953791	9.08207	4.68884
2210404O09Rik_CCDS57051.1_ex0_17:21880762-21880784:-_4-2	AATGGTACAAAGCTTGATA	2210404O09Rik	0.447489	0.529524	0.58638	2.27612	1.51592
2210404O09Rik_CCDS57051.1_ex0_17:21880931-21880953:-_4-3	ACCTTCTAAAACTAACCTC	2210404O09Rik	0.632121	0.63387	-0.360372	1	1.28376
2210404O09Rik_CCDS57051.1_ex0_17:21881011-21881033:+_4-4	TTGGATATTTACATGCTCG	2210404O09Rik	0.161678	0.354918	-0.416914	12.9605	17.3031
2210407C18Rik_CCDS24736.1_ex2_11:58612001-58612023:+_5-1	TGCTCACCGGTGCAGCACT	2210407C18Rik	0.259906	0.430654	-0.241578	13.2607	15.678
2210407C18Rik_CCDS24736.1_ex2_11:58612069-58612091:-_5-2	TATCAAAACCTATGTGCCT	2210407C18Rik	0.133467	0.32296	0.521455	9.50744	6.62354
2210407C18Rik_CCDS24736.1_ex2_11:58612101-58612123:-_5-3	ACCTAGTACTTGAGCAAAA	2210407C18Rik	0.0106716	0.0870374	-2.07082	1.30026	5.46272
2210407C18Rik_CCDS24736.1_ex3_11:58612545-58612567:+_5-4	CAGCTATAAGAGGTTAGAC	2210407C18Rik	0.00405799	0.048542	-2.30062	1.02502	5.04998
2210407C18Rik_CCDS24736.1_ex3_11:58612591-58612613:-_5-5	TACAAGCTACGTGTGAAAA	2210407C18Rik	0.376565	0.498386	-0.398215	4.02765	5.30794
2210408I21Rik_CCDS49316.1_ex2_13:77192678-77192700:-_5-1	ACAGAATGTATGGAAGTCC	2210408I21Rik	0.524679	0.563627	-0.0639084	6.8301	7.13946
2210408I21Rik_CCDS49316.1_ex2_13:77192756-77192778:+_5-2	TCGACGATTCTTAGTAAAC	2210408I21Rik	0.148749	0.340712	-1.25676	1.32528	3.16687
2210408I21Rik_CCDS49316.1_ex6_13:77261935-77261957:-_5-3	GAATCATCTCGGCATGCCA	2210408I21Rik	1.65e-05	0.00142745	-1.39865	9.95784	26.2543
2210408I21Rik_CCDS49316.1_ex6_13:77262091-77262113:+_5-4	AGCAACGTATGTCTCTCAG	2210408I21Rik	0.120275	0.30627	0.543266	13.0355	8.94519
2210408I21Rik_CCDS49316.1_ex8_13:77267685-77267707:-_5-5	GCTGAAGTAATGCCACATC	2210408I21Rik	0.00565358	0.0591308	-1.52872	2.62642	7.578
2300002M23Rik_CCDS50092.1_ex1_17:35567938-35567960:-_5-1	ACTCATTATTCACAGGGTC	2300002M23Rik	0.203082	0.39516	-0.424239	6.45477	8.66143
2300002M23Rik_CCDS50092.1_ex1_17:35567980-35568002:+_5-2	TCAGCGAATCTCCACAAGA	2300002M23Rik	0.0852005	0.257398	0.582664	12.5851	8.40347
2300002M23Rik_CCDS50092.1_ex1_17:35568147-35568169:-_5-3	GCCTCTGGAAAGGTATGGC	2300002M23Rik	0.147	0.338963	-0.576789	7.60578	11.3442
2300002M23Rik_CCDS50092.1_ex1_17:35568182-35568204:+_5-4	GGCTTCCTCTGCACGGCTC	2300002M23Rik	0.05177	0.205463	-0.515686	16.6137	23.7521
2300002M23Rik_CCDS50092.1_ex1_17:35568198-35568220:+_5-5	CTCAGGCAACCTTCACTAG	2300002M23Rik	0.0697014	0.241162	0.561884	17.9648	12.1697
2300005B03Rik_CCDS37103.1_ex0_15:74743079-74743101:-_5-1	TGACGAAGATGTGCTACAG	2300005B03Rik	0.0253066	0.138121	-0.717	10.6835	17.5611
2300005B03Rik_CCDS37103.1_ex0_15:74743116-74743138:+_5-2	AAAGCTGATGGGAGAACCT	2300005B03Rik	0.00682569	0.0663658	1.12018	14.0614	6.46877
2300005B03Rik_CCDS37103.1_ex1_15:74743389-74743411:+_5-3	GCAATGATGACACAGTGGG	2300005B03Rik	0.303723	0.456289	-0.265847	11.8595	14.2592
2300005B03Rik_CCDS37103.1_ex1_15:74743412-74743434:+_5-4	GCTCCATGGGCAGCTAGAC	2300005B03Rik	0.00317384	0.04339	0.900384	25.1712	13.4853
2300005B03Rik_CCDS37103.1_ex1_15:74743442-74743464:+_5-5	TCCTCCAAATCCCTTGCAC	2300005B03Rik	0.353413	0.486341	-0.2129	10.4333	12.0923
2300009A05Rik_CCDS52830.1_ex1_9:63398888-63398910:-_5-1	CGCTTCTTCACCGCGCTCA	2300009A05Rik	0.25126	0.430654	0.200705	31.1514	27.1056
2300009A05Rik_CCDS52830.1_ex1_9:63398974-63398996:-_5-2	ACTACCACGTCCTGCGCAC	2300009A05Rik	0.343914	0.481439	0.118329	27.7985	25.6094
2300009A05Rik_CCDS52830.1_ex1_9:63398989-63399011:+_5-3	GGTAGTTGGCGCCCAGCAC	2300009A05Rik	0.00466977	0.05291	0.778869	29.0245	16.9162
2300009A05Rik_CCDS52830.1_ex1_9:63399008-63399030:+_5-4	CGGCCAATTGAAGTGCGAC	2300009A05Rik	0.509895	0.555355	-0.169407	5.72914	6.44297
2300009A05Rik_CCDS52830.1_ex1_9:63399040-63399062:+_5-5	CGTTGTGGACCGCACTGTA	2300009A05Rik	0.35643	0.488282	0.17	18.19	16.1681
2310002J15Rik_CCDS50526.1_ex0_2:25239188-25239210:+_5-1	CAGCATAAGTCAGTCCCGA	2310002J15Rik	0.169889	0.363369	-0.335399	15.7379	19.8569
2310002J15Rik_CCDS50526.1_ex0_2:25239217-25239239:-_5-2	CTGCAATCCCTATAGCAGT	2310002J15Rik	7.64e-05	0.00410593	-1.92	3.50219	13.2531
2310002J15Rik_CCDS50526.1_ex0_2:25239288-25239310:+_5-3	CTTGATACCTTTGGGCCCA	2310002J15Rik	0.363692	0.492147	0.14861	25.4714	22.9782
2310002J15Rik_CCDS50526.1_ex0_2:25239305-25239327:-_5-4	TACAAACTACTGAAGCCCC	2310002J15Rik	0.0670507	0.236836	-0.744239	7.2805	12.1955
2310002J15Rik_CCDS50526.1_ex0_2:25239341-25239363:+_5-5	CTGGGATACATGTTCCTGC	2310002J15Rik	0.408106	0.513276	0.0841919	21.8432	20.605
2310002L09Rik_CCDS18285.1_ex1_4:73943006-73943028:+_5-1	TTTCTAACACAAACCTAGA	2310002L09Rik	0.264241	0.430654	-0.762556	1	1.69649
2310002L09Rik_CCDS18285.1_ex1_4:73943091-73943113:+_5-2	GTTATACGCTAGTTCAGAG	2310002L09Rik	0.0791278	0.250219	-0.915066	2.95171	5.5659
2310002L09Rik_CCDS18285.1_ex1_4:73943209-73943231:+_5-3	GCATCCACTTTAGACAAGG	2310002L09Rik	0.488911	0.545104	0.242068	5.4539	4.61145
2310002L09Rik_CCDS18285.1_ex2_4:73950572-73950594:-_5-4	AGGTCATACCTCGAAATGC	2310002L09Rik	0.0311326	0.155249	-1.32547	2.95171	7.39742
2310002L09Rik_CCDS18285.1_ex2_4:73950591-73950613:-_5-5	CTGCTGAAACACGGCTCCA	2310002L09Rik	0.12163	0.307746	-0.503194	8.13124	11.5248
2310003H01Rik_CCDS49004.1_ex6_11:120376786-120376808:-_5-1	AGCCAGACGGGGCCATAGG	2310003H01Rik	0.0155461	0.108596	1.15367	9.85775	4.43088
2310003H01Rik_CCDS49004.1_ex6_11:120376918-120376940:-_5-2	TGCGTGAGTATTGCCTCCC	2310003H01Rik	0.36378	0.492171	-0.11719	18.165	19.7021
2310003H01Rik_CCDS49004.1_ex6_11:120377114-120377136:-_5-3	AAGATCCTCCACCACCTAG	2310003H01Rik	0.0540467	0.210327	-0.784927	6.2546	10.7767
2310003H01Rik_CCDS49004.1_ex7_11:120378332-120378354:-_5-4	TGCCTGTCGTTGGACTCGC	2310003H01Rik	0.269297	0.434107	-0.208174	23.6198	27.2862
2310003H01Rik_CCDS49004.1_ex8_11:120378572-120378594:+_5-5	TAGACGAACTCGCGTCCGG	2310003H01Rik	0.000801481	0.018152	-1.13199	10.108	22.1528
2310005G13Rik_CCDS49875.1_ex2_16:57045339-57045361:+_5-1	CACTATCAGGCTTTTAGGG	2310005G13Rik	0.00834773	0.0752202	-0.818695	13.8613	24.4486
2310005G13Rik_CCDS49875.1_ex3_16:57046982-57047004:-_5-2	TACGTGGTCCTTGCAATGC	2310005G13Rik	0.0113194	0.0898918	0.929875	15.813	8.30029
2310005G13Rik_CCDS49875.1_ex3_16:57046997-57047019:-_5-3	CAACACATCATCATGTACG	2310005G13Rik	0.0504302	0.202811	-0.910718	4.70324	8.842
2310005G13Rik_CCDS49875.1_ex3_16:57047041-57047063:+_5-4	GCATTTCTTTATGCGGTGA	2310005G13Rik	0.0636227	0.229728	0.628594	16.0632	10.3898
2310005G13Rik_CCDS49875.1_ex4_16:57049400-57049422:+_5-5	AATTGGGGGGTAATAAGGG	2310005G13Rik	0.000594185	0.0149165	-2.56102	1	5.90125
2310007B03Rik_CCDS15185.1_ex3_1:93156106-93156128:-_5-1	CGCTTCAACGTTGTGCCCG	2310007B03Rik	0.0640831	0.230788	0.433592	33.4034	24.7324
2310007B03Rik_CCDS15185.1_ex4_1:93159614-93159636:-_5-2	TGTACATTGCAAGCACCAC	2310007B03Rik	0.185758	0.379178	-0.432177	6.30464	8.50665
2310007B03Rik_CCDS15185.1_ex4_1:93159670-93159692:+_5-3	GACTTTACTGGGTACAAGG	2310007B03Rik	0.250986	0.430654	0.251668	24.4705	20.5534
2310007B03Rik_CCDS15185.1_ex4_1:93159829-93159851:-_5-4	TCGGAGGCTCTCCTGATCG	2310007B03Rik	0.0293135	0.150216	0.679574	18.6655	11.6538
2310007B03Rik_CCDS15185.1_ex4_1:93159919-93159941:-_5-5	GTTGACTATTCTAGAGACC	2310007B03Rik	0.0189882	0.117173	-1.87066	1	3.65699
2310007L24Rik_CCDS48962.1_ex1_11:106375194-106375216:-_5-1	ATGGGACTGTCCAAGGGAA	2310007L24Rik	0.44153	0.527072	-0.238838	5.32879	6.28819
2310007L24Rik_CCDS48962.1_ex1_11:106375223-106375245:+_5-2	CCTCAGCATAACCGGGTCA	2310007L24Rik	5.72e-14	2.87e-10	-3.09837	2.52634	21.6368
2310007L24Rik_CCDS48962.1_ex1_11:106375235-106375257:-_5-3	ACTGTTACCTTCCTTGACC	2310007L24Rik	0.178019	0.371657	0.40045	12.7603	9.66748
2310007L24Rik_CCDS48962.1_ex2_11:106375504-106375526:-_5-4	TTTCACCTACCGGTGGGCT	2310007L24Rik	0.181937	0.375665	0.44475	12.0347	8.842
2310007L24Rik_CCDS48962.1_ex3_11:106376256-106376278:-_5-5	CTCCTCGTGACTGTCGGTG	2310007L24Rik	0.0372882	0.171861	-0.596636	15.2124	23.004
2310009B15Rik_CCDS35727.1_ex1_1:138853626-138853648:+_5-1	GAACCACATAGCCGGTAGC	2310009B15Rik	0.201785	0.39376	-0.396433	7.30552	9.61588
2310009B15Rik_CCDS35727.1_ex2_1:138856593-138856615:-_5-2	GCACATCGTCGAGCTGCAC	2310009B15Rik	0.0440163	0.188501	0.656955	16.7888	10.6477
2310009B15Rik_CCDS35727.1_ex2_1:138856624-138856646:+_5-3	CAGTTAACTCTCGGCTCGC	2310009B15Rik	0.0562504	0.21489	0.661611	17.4144	11.0089
2310009B15Rik_CCDS35727.1_ex2_1:138856660-138856682:-_5-4	ACTCGTGGGGAACGCCCGA	2310009B15Rik	0.289236	0.447275	-0.24408	15.4376	18.2834
2310009B15Rik_CCDS35727.1_ex2_1:138856705-138856727:-_5-5	CCCTCGGTTCGACTTCCGA	2310009B15Rik	0.200728	0.392947	-0.323112	17.0891	21.3789
2310011J03Rik_CCDS24017.1_ex0_10:80319453-80319475:+_5-1	CTCTCATTCATAGCCACGT	2310011J03Rik	0.137946	0.328155	-0.494042	10.0329	14.1302
2310011J03Rik_CCDS24017.1_ex0_10:80319524-80319546:+_5-2	CCTTGGGGATGGGTCTGGG	2310011J03Rik	0.170082	0.363369	-0.46294	7.856	10.8283
2310011J03Rik_CCDS24017.1_ex1_10:80320175-80320197:+_5-3	CTCCTACCTTCCGGGGCCA	2310011J03Rik	0.325505	0.470279	0.205249	13.9113	12.0665
2310011J03Rik_CCDS24017.1_ex1_10:80320192-80320214:-_5-4	GATCCTGTTTTCACTGCCC	2310011J03Rik	0.422276	0.518966	-0.215091	8.10622	9.40952
2310011J03Rik_CCDS24017.1_ex1_10:80320226-80320248:-_5-5	GATCCTGGAGGACGTGCGA	2310011J03Rik	0.494137	0.547387	-0.0582195	14.6119	15.2136
2310014L17Rik_CCDS20818.1_ex0_7:12928100-12928122:-_5-1	GCTTGAAAATGCCGTCGAA	2310014L17Rik	0.431866	0.523092	-0.158528	7.20543	8.04232
2310014L17Rik_CCDS20818.1_ex0_7:12928216-12928238:-_5-2	TGTGGGCGCGCGGCACATG	2310014L17Rik	0.25822	0.430654	-0.263012	14.1615	16.9936
2310014L17Rik_CCDS20818.1_ex0_7:12928281-12928303:-_5-3	GCATCGCGAGGCAGCAAAC	2310014L17Rik	0.0443587	0.189073	1.01345	9.25723	4.58565
2310014L17Rik_CCDS20818.1_ex0_7:12928329-12928351:+_5-4	TGTGCGCTTTGACCGACGC	2310014L17Rik	0.227906	0.416718	-0.249374	17.4644	20.7598
2310014L17Rik_CCDS20818.1_ex0_7:12928379-12928401:-_5-5	TCTTTCGCGGCCCGGGAGA	2310014L17Rik	0.221712	0.411772	-0.274071	19.2159	23.2362
2310022A10Rik_CCDS21026.1_ex2_7:27564486-27564508:-_5-1	AACTGGATCCACTCGGAAG	2310022A10Rik	0.425766	0.520313	-0.0996978	8.13124	8.71302
2310022A10Rik_CCDS21026.1_ex3_7:27564705-27564727:+_5-2	GAGCTGGGTGTGACCGTCG	2310022A10Rik	0.00268113	0.03912	0.737164	34.6044	20.7598
2310022A10Rik_CCDS21026.1_ex3_7:27564753-27564775:+_5-3	GCCAAGGTGGTACACCGCC	2310022A10Rik	1.56e-05	0.0013775	1.58214	21.0676	7.03628
2310022A10Rik_CCDS21026.1_ex5_7:27571618-27571640:-_5-4	CTGTTGTCTGACCGCCGTG	2310022A10Rik	0.373217	0.497061	-0.081241	55.2475	58.4478
2310022A10Rik_CCDS21026.1_ex6_7:27574637-27574659:+_5-5	CGGCGGGTCACGGCTGAGA	2310022A10Rik	0.390084	0.505261	-0.0862667	17.4894	18.5671
2310022B05Rik_CCDS22773.1_ex2_8:124651394-124651416:-_5-1	ACTTGGCAAGATGAACACT	2310022B05Rik	0.417487	0.516913	-0.452985	2.35118	3.21846
2310022B05Rik_CCDS22773.1_ex3_8:124662911-124662933:+_5-2	TCCCGCACGTCCCCCGCAT	2310022B05Rik	0.485256	0.543996	-0.0219966	33.4534	33.9674
2310022B05Rik_CCDS22773.1_ex3_8:124662961-124662983:-_5-3	GAAATCATCGACCGCTGCC	2310022B05Rik	0.037432	0.172356	-0.80956	8.10622	14.2076
2310022B05Rik_CCDS22773.1_ex3_8:124662978-124663000:+_5-4	TTTCGTCCTGCTGCGCGGG	2310022B05Rik	0.354366	0.486759	0.240439	12.3349	10.4414
2310022B05Rik_CCDS22773.1_ex3_8:124663009-124663031:-_5-5	GAGAAGTACGGGCCCGAGT	2310022B05Rik	0.0128861	0.0968767	-0.993717	7.00526	13.9496
2310030G06Rik_CCDS23170.1_ex0_9:50740708-50740730:+_5-1	TACAACACTTGCTCATACG	2310030G06Rik	0.427516	0.521605	0.0996473	6.65495	6.2108
2310030G06Rik_CCDS23170.1_ex0_9:50740732-50740754:+_5-2	GCTGTTGTCTCATAGTCCT	2310030G06Rik	0.161179	0.354497	-0.56245	5.25372	7.75857
2310030G06Rik_CCDS23170.1_ex1_9:50741295-50741317:-_5-3	CTGTGGCAGAATGGCACAA	2310030G06Rik	0.402438	0.510882	-0.118332	6.05442	6.57195
2310030G06Rik_CCDS23170.1_ex1_9:50741334-50741356:+_5-4	GCTCAATGTGGGTCTTGGG	2310030G06Rik	0.112511	0.296213	0.393981	27.4481	20.8888
2310030G06Rik_CCDS23170.1_ex2_9:50742260-50742282:-_5-5	TCCAGAAGAAAAGCAAAAC	2310030G06Rik	0.0010162	0.0211709	-2.03895	1.97585	8.11971
2310033P09Rik_CCDS24764.1_ex0_11:59208525-59208547:+_5-1	ACTCGCTGATGGCGCCAGT	2310033P09Rik	0.207346	0.398994	-0.290053	13.561	16.5808
2310033P09Rik_CCDS24764.1_ex0_11:59208563-59208585:-_5-2	CGCGTACCAGGTGAGGTCG	2310033P09Rik	0.0228553	0.1302	-0.637924	16.8389	26.2028
2310033P09Rik_CCDS24764.1_ex0_11:59208599-59208621:+_5-3	TGTACCGGCCCGAGCCGTG	2310033P09Rik	0.243599	0.428818	0.244101	24.2203	20.4502
2310033P09Rik_CCDS24764.1_ex1_11:59208816-59208838:+_5-4	CAGTGGTTACAAGAACGTG	2310033P09Rik	0.00705177	0.0676636	1.07804	13.7111	6.49456
2310033P09Rik_CCDS24764.1_ex1_11:59208844-59208866:+_5-5	CCCACCGGCCTGAGCAAGG	2310033P09Rik	0.0272331	0.14412	-0.729369	12.3349	20.4502
2310035C23Rik_CCDS15206.1_ex0_1:105664372-105664394:-_5-1	CATCGATTGACAATCGGGC	2310035C23Rik	0.00042007	0.0123745	-1.68346	3.65232	11.7312
2310035C23Rik_CCDS15206.1_ex0_1:105664480-105664502:-_5-2	AGAAGTAATCGCGCAGTCG	2310035C23Rik	0.506468	0.553557	0.0566033	10.108	9.71907
2310035C23Rik_CCDS15206.1_ex0_1:105664600-105664622:+_5-3	AACCGAGTACGACGTCGGG	2310035C23Rik	0.126513	0.313971	0.452445	13.5109	9.87385
2310035C23Rik_CCDS15206.1_ex7_1:105693157-105693179:-_5-4	CCTATTGGGCTGATCGAAA	2310035C23Rik	0.0324016	0.158797	0.690344	17.7647	11.0089
2310035C23Rik_CCDS15206.1_ex8_1:105695482-105695504:+_5-5	GATAGTCGGTTAGGATCAG	2310035C23Rik	0.304121	0.456289	-0.297366	10.0079	12.2987
2310036O22Rik_CCDS22490.1_ex0_8:85026970-85026992:+_5-1	CGATGGGCTGAGTCGGGAC	2310036O22Rik	0.171657	0.365125	0.358115	16.7888	13.0984
2310036O22Rik_CCDS22490.1_ex0_8:85027028-85027050:+_5-3	GCTCGAGTCCGGTGTCCAG	2310036O22Rik	0.513201	0.55693	0.0241621	10.9587	10.7767
2310036O22Rik_CCDS22490.1_ex0_8:85027148-85027170:-_5-4	CCGGTGGATCGGGTCGCTG	2310036O22Rik	2.59e-05	0.00194166	1.09644	38.4328	17.9738
2310036O22Rik_CCDS22490.1_ex0_8:85027220-85027242:-_5-5	TCCTTACGAAGCTGAGCGT	2310036O22Rik	3.48e-06	0.00049702	1.70873	22.4938	6.8815
2310039H08Rik_CCDS28841.1_ex0_17:46772890-46772912:+_5-1	CCTGCCTCGGTGACCCTGG	2310039H08Rik	0.149494	0.341494	0.343564	19.5662	15.42
2310039H08Rik_CCDS28841.1_ex0_17:46772917-46772939:-_5-2	GCCCTTCTGTACCAGGTGC	2310039H08Rik	0.0732622	0.247393	0.478962	21.7432	15.6006
2310039H08Rik_CCDS28841.1_ex0_17:46772965-46772987:-_5-3	ACCGTGGGTCGCAGTGATG	2310039H08Rik	0.0779231	0.250219	0.661235	13.0856	8.27449
2310039H08Rik_CCDS28841.1_ex0_17:46772979-46773001:-_5-4	GACGCGGTGGGTTCACCGT	2310039H08Rik	0.494556	0.547505	0.00274622	27.6483	27.5957
2310039H08Rik_CCDS28841.1_ex0_17:46772991-46773013:-_5-5	CGAGGGAGCAGAGACGCGG	2310039H08Rik	0.00108728	0.0221207	1.17107	20.3169	9.02258
2310042D19Rik_CCDS51406.1_ex0_4:156217380-156217402:-_5-1	CAAGTTGCCGGCCCTGGAA	2310042D19Rik	0.441947	0.527318	0.0482457	20.6922	20.0117
2310042D19Rik_CCDS51406.1_ex0_4:156217538-156217560:-_5-2	CACGCCTCTTCTTACGACC	2310042D19Rik	0.472029	0.538925	-0.0162407	13.4109	13.5627
2310042D19Rik_CCDS51406.1_ex0_4:156217888-156217910:+_5-3	TCCAAGCCTCAACCCGACG	2310042D19Rik	0.0152346	0.107116	-0.87124	9.33229	17.0709
2310042D19Rik_CCDS51406.1_ex0_4:156217934-156217956:-_5-4	ACGAAGCTATGTCAGACTG	2310042D19Rik	0.123277	0.310152	0.443192	14.5118	10.6735
2310042D19Rik_CCDS51406.1_ex0_4:156218164-156218186:+_5-5	CCCGCCTCTAGGTCGCAAC	2310042D19Rik	0.240913	0.427441	0.261886	17.8397	14.8783
2310044G17Rik_CCDS56849.1_ex0_12:86952873-86952895:+_5-1	CTAGCGCGACCACTTGGCG	2310044G17Rik	0.0835761	0.255578	0.571165	17.3143	11.6538
2310044G17Rik_CCDS56849.1_ex1_12:86960393-86960415:-_5-2	GACCATAGGGGGCAGCGTG	2310044G17Rik	0.121822	0.30808	0.325979	28.6742	22.8751
2310044G17Rik_CCDS56849.1_ex1_12:86960411-86960433:+_5-3	GTCGTCATGAAGAGCGTGC	2310044G17Rik	0.331006	0.473827	-0.204563	9.30727	10.7251
2310044G17Rik_CCDS56849.1_ex2_12:86961954-86961976:+_5-4	CCAAAATAGCCCCCCACCC	2310044G17Rik	0.474991	0.539949	-0.0566612	16.4135	17.0709
2310044G17Rik_CCDS56849.1_ex2_12:86962016-86962038:+_5-5	GTATCGAAGAAACTCTGCA	2310044G17Rik	0.260871	0.430654	-0.468019	3.42712	4.74043
2310045N01Rik_CCDS52568.1_ex1_8:70141895-70141917:+_5-1	CTTGCCAACGAGCCGTCAG	2310045N01Rik	0.40783	0.513274	0.0755848	14.5368	13.7948
2310045N01Rik_CCDS52568.1_ex1_8:70141919-70141941:-_5-2	ATGTTCCTGTAGCCGGTAC	2310045N01Rik	0.113977	0.298169	0.448085	20.1918	14.8009
2310045N01Rik_CCDS52568.1_ex2_8:70142470-70142492:+_5-3	CAGGCTGACATGCAGAGAT	2310045N01Rik	0.296049	0.451704	0.342872	6.8301	5.38533
2310045N01Rik_CCDS52568.1_ex2_8:70142503-70142525:+_5-4	CAGGGCGCCATATACACCG	2310045N01Rik	0.108715	0.291127	0.631308	11.0588	7.13946
2310045N01Rik_CCDS52568.1_ex2_8:70142520-70142542:-_5-5	CACCTGCAGGCGTACTCCA	2310045N01Rik	0.530483	0.567173	-0.0541278	9.90779	10.2866
2310047M10Rik_CCDS36190.1_ex0_11:69059908-69059930:+_5-1	TCAGTCCGGACGCTGTCCG	2310047M10Rik	0.476195	0.540227	-0.11802	7.50569	8.14551
2310047M10Rik_CCDS36190.1_ex0_11:69060001-69060023:+_5-2	ATCGCCCATGGGCCGGAGC	2310047M10Rik	0.0214899	0.12591	0.692463	20.6672	12.7888
2310047M10Rik_CCDS36190.1_ex0_11:69060049-69060071:-_5-3	GGCCCCTGACGGCGTCGCC	2310047M10Rik	0.0521741	0.206773	-0.390966	31.1764	40.8807
2310047M10Rik_CCDS36190.1_ex0_11:69060159-69060181:-_5-4	CGACGGCAGACCCTCAGAG	2310047M10Rik	0.563298	0.591142	0.0729817	7.45565	7.08787
2310047M10Rik_CCDS36190.1_ex0_11:69060188-69060210:-_5-5	CATTCATCTCGACGCCTCC	2310047M10Rik	0.460287	0.534521	0.100492	7.93107	7.39742
2310050C09Rik_CCDS50977.1_ex0_3:92868945-92868967:+_5-1	GGTCGTCTGACACGGAGCT	2310050C09Rik	0.537376	0.571725	-0.0339141	7.93107	8.11971
2310050C09Rik_CCDS50977.1_ex0_3:92869099-92869121:+_5-2	CATTTCACGTATGTCTGGC	2310050C09Rik	1.55e-07	5.29e-05	-2.10937	4.30289	18.5671
2310050C09Rik_CCDS50977.1_ex0_3:92869120-92869142:+_5-3	GGAGTTGGGCATTTCACGT	2310050C09Rik	0.00480281	0.0538935	-1.0416	8.90692	18.335
2310050C09Rik_CCDS50977.1_ex0_3:92869143-92869165:+_5-4	TTTGGTCTGACACGGAACT	2310050C09Rik	0.424101	0.51993	-0.116664	5.2287	5.66909
2310050C09Rik_CCDS50977.1_ex0_3:92869166-92869188:+_5-5	ATCTCACGTAAGTTTGAGC	2310050C09Rik	0.475375	0.540037	-0.0621182	11.4592	11.9633
2310057J18Rik_CCDS23759.1_ex3_10:28982494-28982516:+_5-1	TCATCTGATCCTTGGGTGG	2310057J18Rik	0.00162765	0.0287459	-1.40323	5.47892	14.4913
2310057J18Rik_CCDS23759.1_ex4_10:28983978-28984000:+_5-2	CACAGTCTGTCATTCCAGT	2310057J18Rik	0.0260873	0.14073	-0.969726	5.52896	10.8283
2310057J18Rik_CCDS23759.1_ex5_10:28985991-28986013:-_5-3	TTGGCTGGCAGTATCAATC	2310057J18Rik	0.132857	0.322307	-0.820693	4.2028	7.42322
2310057J18Rik_CCDS23759.1_ex5_10:28986108-28986130:-_5-4	GGGTATACACTGACAGAAT	2310057J18Rik	0.268676	0.433949	-0.258801	12.435	14.8783
2310057J18Rik_CCDS23759.1_ex5_10:28986149-28986171:-_5-5	TGACTACATGATGGAGGAT	2310057J18Rik	0.390836	0.505328	-0.187069	11.7094	13.3305
2310057M21Rik_CCDS40159.1_ex2_7:131357459-131357481:-_5-1	ATGATTAGGTTTCAGCAGC	2310057M21Rik	2.53e-05	0.00191105	1.76058	15.5377	4.58565
2310057M21Rik_CCDS40159.1_ex2_7:131357493-131357515:+_5-2	TGCGCTCCAGGCGATAACC	2310057M21Rik	0.237368	0.424256	-0.572618	2.47629	3.68279
2310057M21Rik_CCDS40159.1_ex4_7:131361750-131361772:+_5-3	CAGGCAGTCTTGCCTCGAC	2310057M21Rik	0.01378	0.100809	-1.04344	5.67909	11.7054
2310057M21Rik_CCDS40159.1_ex4_7:131361818-131361840:+_5-4	ACTCAGAACGCCAACCGAA	2310057M21Rik	0.00691924	0.0669659	-1.32785	3.90254	9.79646
2310057M21Rik_CCDS40159.1_ex4_7:131361914-131361936:+_5-5	TTTCAGACTAACCGGATCC	2310057M21Rik	0.452207	0.531567	0.0856713	6.75504	6.36558
2310057N15Rik_CCDS28302.1_ex0_16:88773852-88773874:+_2-1	AGGACCTCTGGCAGCGGAT	2310057N15Rik	0.374165	0.497302	0.142213	16.989	15.3942
2310057N15Rik_CCDS28302.1_ex0_16:88774030-88774052:+_2-2	GCTGGTAGTGGTGTAGACC	2310057N15Rik	0.174853	0.368725	0.744047	6.2546	3.73438
2310061I04Rik_CCDS50095.1_ex4_17:35895759-35895781:-_5-1	TGATACCTTTCCAAGCCCC	2310061I04Rik	0.0102999	0.0852933	1.23237	11.259	4.79202
2310061I04Rik_CCDS50095.1_ex4_17:35895796-35895818:+_5-2	GCAAGGCGGTCCCTCAAAA	2310061I04Rik	0.00370549	0.0460596	-1.85873	1.92581	6.98469
2310061I04Rik_CCDS50095.1_ex4_17:35895972-35895994:+_5-3	AGGGTGGTAGTGACCGGTG	2310061I04Rik	0.209661	0.40088	-0.469176	4.80333	6.64934
2310061I04Rik_CCDS50095.1_ex4_17:35896007-35896029:+_5-4	GAAGTCGGTGGAGTGGAGT	2310061I04Rik	0.433446	0.523921	0.0663168	10.6084	10.1318
2310061I04Rik_CCDS50095.1_ex4_17:35896031-35896053:-_5-5	TCTACCATTCCCCCCGCTC	2310061I04Rik	0.18855	0.381851	-0.35015	15.1123	19.2636
2310061N02Rik_CCDS49893.1_ex0_16:88707562-88707584:+_5-1	TCTCCTTGACCCATAGACC	2310061N02Rik	0.144413	0.335844	-0.710588	5.10359	8.35188
2310061N02Rik_CCDS49893.1_ex0_16:88707653-88707675:+_5-2	GACACACTTGGACGGTAGC	2310061N02Rik	0.0073918	0.0697086	0.941933	19.266	10.0286
2310061N02Rik_CCDS49893.1_ex0_16:88707740-88707762:+_5-3	TGATAGCCGTGACGGAAAG	2310061N02Rik	0.39988	0.509622	0.327422	5.20368	4.14712
2310061N02Rik_CCDS49893.1_ex0_16:88707766-88707788:-_5-4	TCTCCCAGAAACCGCCATC	2310061N02Rik	0.26306	0.430654	0.247076	19.0658	16.0649
2310061N02Rik_CCDS49893.1_ex0_16:88707798-88707820:+_5-5	TTCTGTGGGTCAGTTGGCG	2310061N02Rik	0.359215	0.489592	0.137584	28.399	25.8158
2310067B10Rik_CCDS25646.1_ex10_11:115790013-115790035:+_5-3	CTTGGGCTCCGTTACGGTG	2310067B10Rik	0.480151	0.542002	0.0756781	14.2116	13.4853
2310067B10Rik_CCDS25646.1_ex12_11:115791017-115791039:-_5-4	GCGCTCCTGCTCGTTGGAA	2310067B10Rik	0.225504	0.41501	0.285222	21.2427	17.4321
2310067B10Rik_CCDS25646.1_ex14_11:115792419-115792441:-_5-5	CGCCGCTTGGTGACACAGG	2310067B10Rik	0.0200491	0.121119	0.606823	26.5474	17.4321
2310067B10Rik_CCDS25646.1_ex3_11:115786236-115786258:-_5-1	CCGGTCTTGCCGCCCGATG	2310067B10Rik	0.0324943	0.159086	-0.528021	22.3937	32.2906
2310067B10Rik_CCDS25646.1_ex6_11:115788738-115788760:+_5-2	CTTCACTATGCCGTGCCGG	2310067B10Rik	0.45379	0.532057	0.0441204	38.1075	36.9597
2310079G19Rik_CCDS49891.1_ex0_16:88627270-88627292:+_5-1	GGCCAAAGCTGGAATGGCG	2310079G19Rik	0.0169759	0.113985	-0.665987	15.5878	24.7324
2310079G19Rik_CCDS49891.1_ex0_16:88627319-88627341:-_5-2	TCCGGGATATCTGGATCCC	2310079G19Rik	0.057311	0.21727	-0.632019	10.2331	15.8585
2310079G19Rik_CCDS49891.1_ex0_16:88627343-88627365:+_5-3	AATCGGAGAGCAGACTGAA	2310079G19Rik	8.89e-06	0.000979951	1.84877	16.8889	4.68884
2310079G19Rik_CCDS49891.1_ex0_16:88627436-88627458:+_5-4	ACGTGGTGTGTTGCTGCCC	2310079G19Rik	0.19438	0.387052	0.217407	37.9323	32.626
2310079G19Rik_CCDS49891.1_ex0_16:88627490-88627512:-_5-5	GTCTGCTCCACTGAGACAA	2310079G19Rik	0.490341	0.545852	0.0892967	13.3858	12.5824
2410002F23Rik_CCDS52228.1_ex0_7:44250791-44250813:-_5-1	TCATACACCCGCAGGATCC	2410002F23Rik	0.15156	0.343711	0.401891	18.09	13.6917
2410002F23Rik_CCDS52228.1_ex0_7:44250881-44250903:-_5-2	TTGCAGCGGTAGTTAAAGA	2410002F23Rik	0.246948	0.430654	-0.576416	3.35206	4.99839
2410002F23Rik_CCDS52228.1_ex0_7:44250953-44250975:-_5-3	GATTCCCAACGCTGACGCC	2410002F23Rik	0.44671	0.529112	-0.175179	7.30552	8.24869
2410002F23Rik_CCDS52228.1_ex0_7:44250977-44250999:-_5-4	TCGGTGGCCTCAAAATGCA	2410002F23Rik	0.035503	0.167719	0.585194	25.1461	16.7614
2410002F23Rik_CCDS52228.1_ex0_7:44251035-44251057:+_5-5	ATCCAGTTGGTGCGTGAGC	2410002F23Rik	0.158501	0.351327	0.36894	17.8147	13.7948
2410004B18Rik_CCDS17898.1_ex0_3:145938167-145938189:+_5-2	CGGCCTCGGCTCCGACGAC	2410004B18Rik	0.0791626	0.250219	-0.442364	18.3152	24.8872
2410004B18Rik_CCDS17898.1_ex0_3:145938222-145938244:-_5-3	CGGAACAGCTCGTCCGGGC	2410004B18Rik	0.0279752	0.146263	0.551981	32.4025	22.1012
2410004B18Rik_CCDS17898.1_ex1_3:145938885-145938907:+_5-4	CTTACTCGACAGCCTCCAA	2410004B18Rik	0.00219333	0.0345391	0.663737	44.7383	28.2406
2410004B18Rik_CCDS17898.1_ex1_3:145938937-145938959:-_5-5	TAGTGTAGGTCTCTGGGGG	2410004B18Rik	0.00228485	0.0354474	-0.746535	22.8441	38.3269
2410004P03Rik_CCDS49033.1_ex1_12:17008257-17008279:+_5-1	GGGGTGCTGTCTTACCAGA	2410004P03Rik	0.299647	0.453796	-0.172267	19.316	21.7658
2410004P03Rik_CCDS49033.1_ex1_12:17008272-17008294:-_5-2	CTGAAAGACTATGACCCTC	2410004P03Rik	0.165728	0.359246	0.511531	11.1339	7.81016
2410004P03Rik_CCDS49033.1_ex2_12:17011117-17011139:+_5-3	GGACACTCACCAACGCCTC	2410004P03Rik	0.348595	0.483978	-0.123906	17.039	18.5671
2410004P03Rik_CCDS49033.1_ex2_12:17011140-17011162:-_5-4	TTGTGGAAGCCGAAGCACG	2410004P03Rik	0.339218	0.478437	-0.180308	14.0865	15.9617
2410004P03Rik_CCDS49033.1_ex2_12:17011169-17011191:-_5-5	TGTGCAACAGGACCAGCTG	2410004P03Rik	0.05533	0.212888	-0.633992	10.9837	17.0452
2410012M07Rik_CCDS52896.1_ex0_9:98865128-98865150:-_5-1	TCGGCGGGCGCTTCCAACT	2410012M07Rik	0.186516	0.380126	0.276841	23.7449	19.599
2410012M07Rik_CCDS52896.1_ex0_9:98865285-98865307:-_5-2	GGAGTCTTGGAGCCCCTCG	2410012M07Rik	0.400878	0.51043	-0.186012	10.8336	12.3245
2410012M07Rik_CCDS52896.1_ex0_9:98865304-98865326:+_5-3	CCACCCATTTTGGACAGCC	2410012M07Rik	0.151961	0.3443	0.280034	30.751	25.3257
2410012M07Rik_CCDS52896.1_ex0_9:98865452-98865474:+_5-4	CTTGGAATTTCTGGAGCAC	2410012M07Rik	0.157682	0.350597	-0.38432	16.4385	21.4563
2410012M07Rik_CCDS52896.1_ex0_9:98865480-98865502:-_5-5	ATTGGCCTGATCATCTGGA	2410012M07Rik	0.0145546	0.104343	-0.700247	14.5869	23.7005
2410015M20Rik_CCDS28908.1_ex2_17:56608872-56608894:+_5-1	GCACACATATTGGCTGAAC	2410015M20Rik	0.415116	0.5161	0.144607	6.78006	6.13342
2410015M20Rik_CCDS28908.1_ex2_17:56608886-56608908:+_5-2	TGAACTGGTACATTGCTGG	2410015M20Rik	0.00485118	0.0541459	0.981805	18.9907	9.61588
2410015M20Rik_CCDS28908.1_ex2_17:56608900-56608922:+_5-3	GCTGGTGGCACAACCTCCT	2410015M20Rik	0.140173	0.330739	0.616347	9.00701	5.87546
2410015M20Rik_CCDS28908.1_ex2_17:56608912-56608934:+_5-4	ACCTCCTCGGCCTTCCGCA	2410015M20Rik	0.247155	0.430654	0.226359	25.0711	21.4305
2410015M20Rik_CCDS28908.1_ex2_17:56608934-56608956:+_5-5	CAGCCTCACTCTTGTCACT	2410015M20Rik	0.132476	0.321762	0.34934	21.518	16.8904
2410016O06Rik_CCDS26033.1_ex0_12:83950915-83950937:-_5-1	TTCCGCTTGCCCCGAACCG	2410016O06Rik	0.326905	0.471463	0.128868	27.7484	25.3773
2410016O06Rik_CCDS26033.1_ex0_12:83950983-83951005:-_5-2	ACCTCGGGCGCGCTGACAC	2410016O06Rik	0.496899	0.548603	-0.021611	29.625	30.0722
2410016O06Rik_CCDS26033.1_ex0_12:83951088-83951110:+_5-3	GCTCGCACGCGGATGAGCC	2410016O06Rik	0.075358	0.250219	0.465909	23.9701	17.3547
2410016O06Rik_CCDS26033.1_ex0_12:83951218-83951240:+_5-4	TCCGGACCACTTCTACCGG	2410016O06Rik	0.00014937	0.00614221	-1.33479	8.28137	20.8888
2410016O06Rik_CCDS26033.1_ex0_12:83951368-83951390:-_5-5	CGTCCATCGACGTAGCGCG	2410016O06Rik	0.312127	0.461575	0.246753	10.8586	9.15156
2410018M08Rik_CCDS39292.1_ex3_5:129901861-129901883:-_5-1	GTATCCTTGCCGGCGAAGC	2410018M08Rik	0.532022	0.568139	-0.0831438	8.90692	9.43531
2410018M08Rik_CCDS39292.1_ex3_5:129902113-129902135:-_5-2	CGGACAGTGTCGTTAGATA	2410018M08Rik	0.197351	0.389704	-0.430342	8.13124	10.9573
2410018M08Rik_CCDS39292.1_ex3_5:129902156-129902178:+_5-3	GCTGATATTCTTGATCAGG	2410018M08Rik	0.00545152	0.0580881	1.00955	18.165	9.02258
2410018M08Rik_CCDS39292.1_ex3_5:129902199-129902221:-_5-4	GGATGCTGCATATTGGAAG	2410018M08Rik	0.0691387	0.240535	0.836574	10.3081	5.77227
2410018M08Rik_CCDS39292.1_ex3_5:129902219-129902241:-_5-5	GTCTGTCGATTCATCGAGC	2410018M08Rik	0.469751	0.53782	0.13811	10.3832	9.43531
2410066E13Rik_CCDS20158.1_ex0_6:54681859-54681881:+_5-1	ATGGACTTCTACGCCGACC	2410066E13Rik	0.300509	0.454452	0.25276	16.3134	13.6917
2410066E13Rik_CCDS20158.1_ex0_6:54681888-54681910:-_5-2	TCCGGACACAGTACGTAGA	2410066E13Rik	0.0854626	0.257756	0.709616	12.435	7.60379
2410066E13Rik_CCDS20158.1_ex1_6:54689032-54689054:-_5-3	GGCCAGCTGCAAGAAGGGC	2410066E13Rik	0.0789073	0.250219	-0.670729	6.70499	10.6735
2410066E13Rik_CCDS20158.1_ex2_6:54698976-54698998:-_5-4	GTCTGGAAGCCCCAGCAAC	2410066E13Rik	0.436225	0.52499	-0.145032	8.20631	9.07417
2410066E13Rik_CCDS20158.1_ex2_6:54698992-54699014:-_5-5	ACGCGTCGTCATCTGCGTC	2410066E13Rik	0.000462355	0.0132523	-1.17882	9.6826	21.9206
2410076I21Rik_CCDS52814.1_ex2_9:58660267-58660289:+_5-1	ACGGTGACGTACTGGGCCA	2410076I21Rik	0.12687	0.314312	-0.441752	15.0373	20.4244
2410076I21Rik_CCDS52814.1_ex3_9:58665862-58665884:-_5-2	TTGAAGATTGTAAGACGCA	2410076I21Rik	0.284822	0.444143	-0.433162	4.428	5.97864
2410076I21Rik_CCDS52814.1_ex4_9:58712048-58712070:+_5-3	ACCTGATACAACGATCGTG	2410076I21Rik	0.368553	0.494388	-0.287373	6.78006	8.27449
2410076I21Rik_CCDS52814.1_ex5_9:58741390-58741412:-_5-4	TGCAGCGGGCTCGCCCACA	2410076I21Rik	0.179222	0.372892	0.336404	18.9157	14.9815
2410076I21Rik_CCDS52814.1_ex5_9:58741440-58741462:-_5-5	TTCATGCTCTTGGACAACG	2410076I21Rik	0.00302867	0.0421204	0.921123	24.0702	12.7114
2410089E03Rik_CCDS49578.1_ex1_15:8174842-8174864:-_5-1	ACCATTAGTGGATGTCGCC	2410089E03Rik	0.000116817	0.00525184	1.3332	22.0184	8.73882
2410089E03Rik_CCDS49578.1_ex10_15:8187276-8187298:-_5-2	TGCGGTGAGCCTTATCAAG	2410089E03Rik	0.0957319	0.273248	0.425899	20.5421	15.291
2410089E03Rik_CCDS49578.1_ex10_15:8187440-8187462:-_5-3	GCCGGTCTACTTTCATCAG	2410089E03Rik	0.153784	0.346107	-0.363057	17.2642	22.2044
2410089E03Rik_CCDS49578.1_ex15_15:8201346-8201368:+_5-4	ATTGCAATTTTGCGCGGTA	2410089E03Rik	0.428691	0.521902	0.120056	13.0856	12.0407
2410089E03Rik_CCDS49578.1_ex23_15:8216332-8216354:+_5-5	TACAGTCATGCGGCACGTC	2410089E03Rik	0.266833	0.432631	-0.240538	13.3358	15.7553
2410124H12Rik_CCDS57040.1_ex0_16:92478853-92478875:+_5-1	TGTCGATTGGCTTGGAGAA	2410124H12Rik	0.413941	0.51574	0.0850629	12.6352	11.9117
2410124H12Rik_CCDS57040.1_ex0_16:92478882-92478904:-_5-2	GGCGGAGCAAGTAGCGCTC	2410124H12Rik	0.165331	0.358949	-0.475592	7.80596	10.8541
2410124H12Rik_CCDS57040.1_ex0_16:92478899-92478921:-_5-3	AGTGGACAGAACCTCGTGG	2410124H12Rik	0.484239	0.543549	-0.01168	11.5342	11.628
2410124H12Rik_CCDS57040.1_ex0_16:92478924-92478946:-_5-4	ACCTCTTGGGGACTCCAGC	2410124H12Rik	0.273377	0.436835	0.236572	21.2677	18.0512
2410124H12Rik_CCDS57040.1_ex0_16:92478947-92478969:+_5-5	TGCTATGGATGCGCTCATG	2410124H12Rik	0.0466587	0.194341	-0.792716	7.60578	13.1757
2410127L17Rik_CCDS29689.1_ex0_19:18671191-18671213:-_5-1	CGCGCCTTACCCGTAGTAG	2410127L17Rik	0.0690364	0.24053	0.477984	23.9201	17.1741
2410127L17Rik_CCDS29689.1_ex1_19:18677690-18677712:-_5-2	TTCACTCGTTCATGCATGC	2410127L17Rik	0.422791	0.519238	0.142709	13.2357	11.9891
2410127L17Rik_CCDS29689.1_ex1_19:18677773-18677795:-_5-3	GGATCTTGTCCAAGTGAAG	2410127L17Rik	0.01984	0.120379	-1.29349	3.30201	8.09392
2410127L17Rik_CCDS29689.1_ex2_19:18679121-18679143:+_5-4	CCAGCATCTACATTTGACA	2410127L17Rik	0.190931	0.384003	-0.427899	7.20543	9.69327
2410127L17Rik_CCDS29689.1_ex3_19:18690240-18690262:+_5-5	AAGTAAATATTCTGGTACC	2410127L17Rik	0.54276	0.575478	-0.208868	2.85162	3.29585
2410131K14Rik_CCDS39237.1_ex0_5:118245448-118245470:-_5-1	AAGTCGCTTACCTGCTTGA	2410131K14Rik	0.00239803	0.0364612	-0.966574	11.0588	21.6111
2410131K14Rik_CCDS39237.1_ex1_5:118255702-118255724:-_5-2	CTGTTCCCGGTCTTGAACC	2410131K14Rik	0.00405754	0.048542	1.13875	16.2884	7.39742
2410131K14Rik_CCDS39237.1_ex1_5:118255730-118255752:-_5-3	GGTTAAACTGCACCTTCCA	2410131K14Rik	0.0527741	0.207567	-0.993365	3.32704	6.62354
2410131K14Rik_CCDS39237.1_ex1_5:118255778-118255800:+_5-4	AGTGCCGGAACTCTGTCCA	2410131K14Rik	7.44e-05	0.00402972	-1.19383	12.2098	27.9311
2410137M14Rik_CCDS50104.1_ex1_17:36978500-36978522:+_5-1	CCAGCAGTGATCCCCGTGA	2410137M14Rik	0.100291	0.279428	-0.429934	17.1141	23.0556
2410137M14Rik_CCDS50104.1_ex1_17:36978512-36978534:-_5-2	TCCCACCACACCCATCACG	2410137M14Rik	0.120348	0.306397	-0.38119	18.4152	23.9843
2410137M14Rik_CCDS50104.1_ex2_17:36978650-36978672:-_5-3	TCATCCTGAAATGGAGTAA	2410137M14Rik	0.430166	0.522359	0.757942	2.47629	1.46433
2410137M14Rik_CCDS50104.1_ex2_17:36978710-36978732:+_5-4	ATTTATGCTCTTCTCCTGA	2410137M14Rik	0.451618	0.531208	-0.0968452	11.259	12.0407
2410137M14Rik_CCDS50104.1_ex2_17:36978755-36978777:+_5-5	GGAAGGCTTCGTCCTCTGC	2410137M14Rik	0.245713	0.430654	-0.386136	8.58163	11.2152
2510002D24Rik_CCDS28029.1_ex1_16:18836780-18836802:+_5-1	TACGTCCACGGCAAGCGGC	2510002D24Rik	0.0178335	0.117173	0.667015	26.122	16.4518
2510002D24Rik_CCDS28029.1_ex1_16:18836799-18836821:-_5-2	GGAGCCACTGCCTGCAATC	2510002D24Rik	0.191459	0.384623	-0.554385	6.35469	9.33213
2510002D24Rik_CCDS28029.1_ex1_16:18836819-18836841:-_5-3	GCGGCAGTTAGTCAGGTCG	2510002D24Rik	0.00938478	0.0807752	-0.9442	8.83185	16.9936
2510002D24Rik_CCDS28029.1_ex2_16:18839092-18839114:+_5-4	TCCCTCTGTGAGAGCGAGC	2510002D24Rik	0.0452297	0.191321	-0.911983	4.60315	8.66143
2510002D24Rik_CCDS28029.1_ex2_16:18839104-18839126:+_5-5	AGCGAGCAGGTTCGGGTCC	2510002D24Rik	0.0717035	0.244569	-0.595814	8.95696	13.5369
2510003E04Rik_CCDS23890.1_ex5_10:62575088-62575110:-_5-1	GAAACCGCCCGGACCTACC	2510003E04Rik	0.143534	0.334523	-0.511973	10.108	14.414
2510003E04Rik_CCDS23890.1_ex6_10:62577990-62578012:+_5-2	GCCGAGCGACAGGCGGTAG	2510003E04Rik	0.315237	0.463723	0.246013	10.8836	9.17735
2510003E04Rik_CCDS23890.1_ex6_10:62578062-62578084:-_5-3	GTGAACCACATCGACACGG	2510003E04Rik	0.39809	0.508856	0.0930731	13.586	12.7372
2510003E04Rik_CCDS23890.1_ex6_10:62578089-62578111:+_5-4	GTGGAACTCGACCACCGCG	2510003E04Rik	0.446092	0.529063	0.0432595	14.5869	14.156
2510003E04Rik_CCDS23890.1_ex6_10:62578183-62578205:-_5-5	CGAGCCGGCTGCTGACGAT	2510003E04Rik	0.456591	0.532938	-0.0414424	17.2142	17.7158
2510009E07Rik_CCDS28062.1_ex0_16:21653420-21653442:-_5-1	GAGAGTGACACTCCGAAAC	2510009E07Rik	0.0781374	0.250219	-1.15826	2.25109	5.02419
2510009E07Rik_CCDS28062.1_ex0_16:21653553-21653575:+_5-2	TAGTTGTCGATGAAGAGAT	2510009E07Rik	0.632121	0.63387	-0.471906	1	1.38694
2510009E07Rik_CCDS28062.1_ex0_16:21653581-21653603:+_5-3	TACAGTACCTTGGCGAGTC	2510009E07Rik	0.487866	0.545033	0.240723	3.10184	2.62515
2510009E07Rik_CCDS28062.1_ex1_16:21694210-21694232:+_5-4	CTTACAGTGACACCATCCC	2510009E07Rik	0.241958	0.428048	0.315312	17.3893	13.9754
2510009E07Rik_CCDS28062.1_ex1_16:21694281-21694303:+_5-5	AGATGGACAGCCCGTCGCA	2510009E07Rik	0.369843	0.495269	0.145176	25.4964	23.0556
2510039O18Rik_CCDS18925.1_ex0_4:147941370-147941392:-_5-1	CGAAGTCCGGCGTCACGGC	2510039O18Rik	0.287172	0.445916	0.229792	22.4688	19.1604
2510039O18Rik_CCDS18925.1_ex0_4:147941394-147941416:-_5-2	GCGGGCGTAGCTGCACGAA	2510039O18Rik	0.534202	0.569544	0.0264625	12.1848	11.9633
2510039O18Rik_CCDS18925.1_ex0_4:147941609-147941631:-_5-3	ATAGACGTGGGGTCGGCCT	2510039O18Rik	0.433721	0.523963	-0.147124	12.0847	13.3821
2510039O18Rik_CCDS18925.1_ex0_4:147941656-147941678:-_5-4	AACGCGGCCACGCGCTCCG	2510039O18Rik	0.374165	0.497302	0.125113	16.7888	15.3942
2510039O18Rik_CCDS18925.1_ex0_4:147941759-147941781:-_5-5	TGTGGACCGGCCCGAGTAG	2510039O18Rik	1.26e-08	8.1e-06	1.25431	53.6461	22.4881
2510049J12Rik_CCDS51877.1_ex1_6:115586760-115586782:-_5-1	CGCGGCATACAGCGAGACG	2510049J12Rik	0.137631	0.327738	0.4591	13.7862	10.0286
2510049J12Rik_CCDS51877.1_ex1_6:115586777-115586799:-_5-2	TGTATAATTACAGTGCACG	2510049J12Rik	0.354553	0.486908	0.471658	5.42888	3.91496
2510049J12Rik_CCDS51877.1_ex2_6:115589344-115589366:-_5-3	TTGGAATCACTAACACACG	2510049J12Rik	0.00103933	0.0214942	-1.28353	6.42975	15.6522
2510049J12Rik_CCDS51877.1_ex2_6:115589382-115589404:-_5-4	CTGTTTCAGGGAGTACGAT	2510049J12Rik	0.448105	0.529862	0.2339	7.45565	6.33978
2510049J12Rik_CCDS51877.1_ex3_6:115592274-115592296:+_5-5	TAAGGAACGTCCCTCGCGT	2510049J12Rik	0.323299	0.469142	0.171417	25.2963	22.4623
2610002J02Rik_CCDS57317.1_ex1_4:155250580-155250602:-_5-1	CAATCCGCGGTCCCGCTCA	2610002J02Rik	0.0101908	0.0847793	0.747044	24.971	14.8783
2610002J02Rik_CCDS57317.1_ex1_4:155250592-155250614:-_5-2	CGGTTCGGGGTCCAATCCG	2610002J02Rik	0.516876	0.559098	0.0332969	19.291	18.8509
2610002J02Rik_CCDS57317.1_ex1_4:155250643-155250665:-_5-3	GCTTTTGGACACACCTGGC	2610002J02Rik	0.13618	0.325928	-0.352953	22.2936	28.4728
2610002J02Rik_CCDS57317.1_ex2_4:155250786-155250808:-_5-4	CCACAGTGAAGGCCTCAGG	2610002J02Rik	0.105677	0.28643	0.420006	24.2203	18.1028
2610002J02Rik_CCDS57317.1_ex2_4:155250870-155250892:+_5-5	ACCTGTTCTGTGAACCTGA	2610002J02Rik	0.0574629	0.217359	-0.868628	4.82835	8.81621
2610002M06Rik_CCDS53171.1_ex4_X:107793092-107793114:-_5-1	AGGAGTATGAACCTTGAGA	2610002M06Rik	0.602544	0.626131	0.210598	2.35118	2.03184
2610002M06Rik_CCDS53171.1_ex4_X:107793125-107793147:-_5-2	GCAGGTGTAGTTAAATCTA	2610002M06Rik	0.0015404	0.0277648	2.38574	6.30464	1.20637
2610002M06Rik_CCDS53171.1_ex5_X:107793512-107793534:-_5-3	TTCAAACTGCAGTAACAAT	2610002M06Rik	0.530922	0.567428	-0.129029	2.80158	3.06368
2610002M06Rik_CCDS53171.1_ex5_X:107793543-107793565:-_5-4	AGTGCTAGGGTTGATGCTG	2610002M06Rik	0.0365714	0.17031	0.586491	25.2462	16.813
2610002M06Rik_CCDS53171.1_ex5_X:107793555-107793577:-_5-5	TTCTTGAGAATGAGTGCTA	2610002M06Rik	0.0421051	0.183639	0.946927	10.133	5.25635
2610008E11Rik_CCDS35965.1_ex0_10:79067953-79067975:-_5-1	TCCGAATTCACAGCACACC	2610008E11Rik	0.00495725	0.054769	0.897106	21.9433	11.7828
2610008E11Rik_CCDS35965.1_ex2_10:79088286-79088308:-_5-2	CCTCGCTTTGGAGCCTCCC	2610008E11Rik	0.461401	0.535218	-0.0351521	17.2642	17.6901
2610008E11Rik_CCDS35965.1_ex2_10:79088321-79088343:-_5-3	ATCGCATGGATTTGAGCCG	2610008E11Rik	0.359477	0.489592	0.166826	22.4938	20.0375
2610008E11Rik_CCDS35965.1_ex3_10:79092397-79092419:+_5-4	CGTTATGCACTAACCTGGA	2610008E11Rik	0.346168	0.482374	-0.142954	12.2599	13.5369
2610008E11Rik_CCDS35965.1_ex3_10:79092442-79092464:-_5-5	CGTGAATTTGGGCCATGGA	2610008E11Rik	0.32419	0.469734	-0.143157	19.6163	21.6626
2610015P09Rik_CCDS57030.1_ex2_16:43905444-43905466:-_5-1	TCAAATGGTCATGGGCGTC	2610015P09Rik	0.252531	0.430654	-0.23026	15.9381	18.6961
2610015P09Rik_CCDS57030.1_ex3_16:43906927-43906949:+_5-2	AAGGATCCTCGTCTTACCA	2610015P09Rik	0.0443587	0.189073	1.00955	9.2322	4.58565
2610015P09Rik_CCDS57030.1_ex4_16:43908426-43908448:+_5-3	TTAAGACGCGAGAAACAAC	2610015P09Rik	0.084961	0.257344	-1.3425	1.02502	2.59936
2610015P09Rik_CCDS57030.1_ex6_16:43931316-43931338:+_5-4	CATACACGATCCCGGAAGT	2610015P09Rik	0.0409001	0.180742	-0.905808	5.2287	9.79646
2610015P09Rik_CCDS57030.1_ex7_16:43939018-43939040:+_5-5	TCTCGCAAAGGAGCAAACT	2610015P09Rik	0.0936505	0.269902	-0.723807	5.35381	8.842
2610018G03Rik_CCDS40968.1_ex3_X:50885681-50885703:-_5-1	TATACCTTTAATGTCTCGG	2610018G03Rik	0.505475	0.553071	-0.100968	6.70499	7.19105
2610018G03Rik_CCDS40968.1_ex4_X:50885806-50885828:+_5-2	GAACAAGGTGATGTTAAAC	2610018G03Rik	0.632121	0.63387	0	1	1
2610018G03Rik_CCDS40968.1_ex4_X:50885880-50885902:-_5-3	CAAAACGGAGTCCCTACGA	2610018G03Rik	0.0233128	0.131748	-0.370938	51.7194	66.8831
2610018G03Rik_CCDS40968.1_ex5_X:50886762-50886784:-_5-4	TAAAGTCTCCAATAAGAGT	2610018G03Rik	0.0803014	0.250219	-1.36377	1	2.57356
2610018G03Rik_CCDS40968.1_ex6_X:50887937-50887959:+_5-5	GATCGATCGATTTAAGAGA	2610018G03Rik	0.226781	0.415819	-0.851968	2.42625	4.37928
2610020H08Rik_CCDS21787.1_ex5_7:119818445-119818467:-_5-1	CACAGTCAAGTCCAAAGAG	2610020H08Rik	0.350629	0.484684	-0.544217	2.10096	3.06368
2610020H08Rik_CCDS21787.1_ex6_7:119819426-119819448:+_5-2	TTTAGTGCCTTACATCCAT	2610020H08Rik	0.0528714	0.207633	0.781441	13.3358	7.75857
2610020H08Rik_CCDS21787.1_ex6_7:119819516-119819538:-_5-3	AATCCAGAATCTTGAGATC	2610020H08Rik	0.105311	0.286178	0.689951	7.60578	4.71463
2610020H08Rik_CCDS21787.1_ex6_7:119819539-119819561:-_5-4	AAGTAACGAATACCTGGTA	2610020H08Rik	0.632121	0.63387	-0.207613	1	1.15478
2610020H08Rik_CCDS21787.1_ex7_7:119823855-119823877:+_5-5	GTGGGCCATTGCCTAGACT	2610020H08Rik	0.569927	0.596669	0.00123412	16.3885	16.3745
2610028H24Rik_CCDS35945.1_ex3_10:76452815-76452837:-_5-1	CCATGCATCCTCCAGGCAT	2610028H24Rik	0.164249	0.357549	0.333033	19.7164	15.6522
2610028H24Rik_CCDS35945.1_ex3_10:76452931-76452953:+_5-2	GGATCATCCAGCACCCGGT	2610028H24Rik	0.261473	0.430654	-0.252449	12.3599	14.7235
2610028H24Rik_CCDS35945.1_ex4_10:76454724-76454746:-_5-3	TGCGGTAGCTGCTGAATGA	2610028H24Rik	0.0101902	0.0847793	-0.526152	33.4034	48.1036
2610028H24Rik_CCDS35945.1_ex4_10:76454753-76454775:-_5-4	GAGAAATCTGTGCAATCAG	2610028H24Rik	0.000299467	0.00989051	-1.15292	10.6585	23.7005
2610028H24Rik_CCDS35945.1_ex5_10:76457487-76457509:+_5-5	ACTCGCCTTTTAGACATGG	2610028H24Rik	0.0274208	0.144731	-1.30599	2.25109	5.5659
2610034B18Rik_CCDS21390.1_ex2_7:79928215-79928237:-_5-1	GGTCATGGAACTCGAACTG	2610034B18Rik	0.0328612	0.160064	0.856101	11.7094	6.46877
2610034B18Rik_CCDS21390.1_ex2_7:79928253-79928275:+_5-2	CATCCAGAATGCCACCGCC	2610034B18Rik	0.175471	0.369319	0.337313	16.6137	13.1499
2610034B18Rik_CCDS21390.1_ex2_7:79928289-79928311:+_5-3	CTCTGTCAATTCCAGCAGC	2610034B18Rik	0.0781468	0.250219	0.489962	18.5403	13.2015
2610034B18Rik_CCDS21390.1_ex3_7:79929568-79929590:-_5-4	CCTCATGTCATCTTACAGT	2610034B18Rik	0.0525191	0.207345	0.622883	15.5627	10.106
2610034B18Rik_CCDS21390.1_ex3_7:79929645-79929667:+_5-5	GGGGTCAAACTTACGCCTG	2610034B18Rik	0.0486422	0.198813	0.482551	31.2765	22.3849
2610034M16Rik_CCDS37673.1_ex10_17:58973558-58973580:+_5-1	TTCGGAACTAGAATGCTGC	2610034M16Rik	0.0476944	0.196649	0.773169	14.3617	8.40347
2610034M16Rik_CCDS37673.1_ex10_17:58973705-58973727:+_5-2	ACCCCAATATATTGACTAA	2610034M16Rik	0.264241	0.430654	-0.624538	1	1.54172
2610034M16Rik_CCDS37673.1_ex10_17:58973774-58973796:-_5-3	TTTACTCAGTCCGTCCCAC	2610034M16Rik	0.0573225	0.21727	-0.50675	15.1374	21.5079
2610034M16Rik_CCDS37673.1_ex10_17:58974470-58974492:+_5-4	GACTCACAGGGTTCATCCG	2610034M16Rik	0.518637	0.560209	-0.083583	8.80683	9.33213
2610034M16Rik_CCDS37673.1_ex10_17:58974944-58974966:-_5-5	CCGTGAAAAATCGTTACCA	2610034M16Rik	0.426699	0.521017	-0.0745533	9.10709	9.59009
2610301B20Rik_CCDS17961.1_ex0_4:10874693-10874715:+_5-1	GTGAGCGGCCCAAAGGCGA	2610301B20Rik	1.02e-05	0.00103792	-2.96058	1	7.78436
2610301B20Rik_CCDS17961.1_ex1_4:10879587-10879609:-_5-2	AAGATTTTCTGTCAAAGTC	2610301B20Rik	0.356621	0.488373	0.261015	5.8042	4.84361
2610301B20Rik_CCDS17961.1_ex2_4:10881834-10881856:+_5-3	GTGTCAGAGCTCCCATGCA	2610301B20Rik	0.501735	0.550841	-0.0881843	8.68172	9.22894
2610301B20Rik_CCDS17961.1_ex2_4:10881847-10881869:+_5-4	CATGCAAGGCGTCAGTAAA	2610301B20Rik	0.15379	0.346107	-0.506714	9.38234	13.3305
2610301B20Rik_CCDS17961.1_ex3_4:10882451-10882473:+_5-5	TGGAACAAATACTTCACAG	2610301B20Rik	0.155009	0.347787	0.374346	17.8147	13.7433
2610301G19Rik_CCDS49534.1_ex11_14:70143467-70143489:+_5-2	GCAACGATAGAACTCCTCC	2610301G19Rik	0.24023	0.426676	0.324349	10.6835	8.53245
2610301G19Rik_CCDS49534.1_ex12_14:70143668-70143690:-_5-3	CACCACCCAAGTCGGATCC	2610301G19Rik	0.00023244	0.0083558	0.945456	35.9055	18.6445
2610301G19Rik_CCDS49534.1_ex13_14:70145921-70145943:-_5-4	AACGCAAACAGCGGGCTGG	2610301G19Rik	0.0483791	0.198148	0.803993	10.7085	6.13342
2610301G19Rik_CCDS49534.1_ex16_14:70151605-70151627:-_5-5	GCCGCATACAACCCAGGCC	2610301G19Rik	0.125453	0.31287	-0.503997	8.18128	11.6022
2610301G19Rik_CCDS49534.1_ex9_14:70142478-70142500:+_5-1	GTAACTGCCGGGGCGGCCC	2610301G19Rik	1.87e-06	0.000312906	1.20615	39.6839	17.1999
2610305D13Rik_CCDS59663.1_ex0_4:147613852-147613874:+_4-2	AGGTTTGAAGATTGAAGAG	2610305D13Rik	0.264241	0.430654	-0.868271	1	1.82547
2610305D13Rik_CCDS59663.1_ex0_4:147613891-147613913:+_4-3	TTATGAGGTGTACTTTGGG	2610305D13Rik	0.269525	0.434107	0.336256	9.95784	7.88755
2610305D13Rik_CCDS59663.1_ex0_4:147613969-147613991:-_4-4	GCACATTTTCAATGAGCAT	2610305D13Rik	0.302136	0.455692	1.15186	2.45127	1.10318
2610318N02Rik_CCDS37269.1_ex3_16:17118328-17118350:+_5-1	CGGGGCATAGTGTAGACAG	2610318N02Rik	0.238412	0.42521	-0.349849	11.2089	14.285
2610318N02Rik_CCDS37269.1_ex3_16:17118446-17118468:+_5-2	TTGACTGATCTCGAAAGAT	2610318N02Rik	0.189729	0.382923	-0.460606	8.05617	11.0863
2610318N02Rik_CCDS37269.1_ex4_16:17121027-17121049:-_5-3	TAAACCAGTGCAATGACAT	2610318N02Rik	0.378647	0.499617	0.160458	10.8336	9.69327
2610318N02Rik_CCDS37269.1_ex5_16:17121342-17121364:-_5-4	CGGAGAGAGTCGTGCGGAA	2610318N02Rik	0.416891	0.516777	0.154375	13.2858	11.9375
2610318N02Rik_CCDS37269.1_ex5_16:17121364-17121386:-_5-5	TTGGATCGCAACCCAGCAC	2610318N02Rik	0.00193477	0.0319265	0.826256	33.3783	18.8251
2610507B11Rik_CCDS25097.1_ex15_11:78272154-78272176:-_5-3	ATAGAGACGACGAGAGCGC	2610507B11Rik	0.0803014	0.250219	1.3931	2.62642	1
2610507B11Rik_CCDS25097.1_ex16_11:78272812-78272834:+_5-4	ATCCGGGACTGGCGGCTAA	2610507B11Rik	0.386024	0.503374	-0.132303	21.3178	23.3652
2610507B11Rik_CCDS25097.1_ex16_11:78272863-78272885:-_5-5	ACGTCGACGGGAGCATGGC	2610507B11Rik	0.283243	0.443025	-0.28412	13.5109	16.4518
2610507B11Rik_CCDS25097.1_ex8_11:78266649-78266671:-_5-1	GAAGCTTCGAAGCGGCAGT	2610507B11Rik	0.0353126	0.167135	-0.658566	12.7102	20.0633
2610507B11Rik_CCDS25097.1_ex9_11:78266952-78266974:-_5-2	GACAATTCGTTGGCGACTC	2610507B11Rik	0.0993477	0.277992	-0.456157	14.5118	19.9085
2610524H06Rik_CCDS39225.1_ex0_5:114822669-114822691:-_5-2	GAGCTGGACAGGTTGCACA	2610524H06Rik	0.542228	0.575227	0.0308528	16.4385	16.0907
2610524H06Rik_CCDS39225.1_ex1_5:114823312-114823334:-_5-4	TGCTGCGGAGGCAGAGCCT	2610524H06Rik	0.00137653	0.0257007	-1.39605	5.37883	14.156
2610524H06Rik_CCDS39225.1_ex1_5:114823325-114823347:+_5-5	CCGCAGCACCTCGTAGGAC	2610524H06Rik	0.0481197	0.197747	-0.813578	6.88015	12.0923
2610528A11Rik_CCDS56949.1_ex0_14:37102678-37102700:-_5-1	ATACCCAGGAAACCACACA	2610528A11Rik	0.0382895	0.174535	-1.7566	1.25022	4.22451
2610528A11Rik_CCDS56949.1_ex1_14:37107360-37107382:+_5-2	TGAGGTCACTTACCTTTCC	2610528A11Rik	0.367461	0.493649	-0.27042	8.6567	10.4414
2610528A11Rik_CCDS56949.1_ex1_14:37107372-37107394:+_5-3	CCTTTCCAGGTTGTCAGCT	2610528A11Rik	0.225686	0.415272	-0.269484	21.1176	25.4547
2610528A11Rik_CCDS56949.1_ex1_14:37107386-37107408:+_5-4	CAGCTTGGATCTAGGAGAT	2610528A11Rik	0.480731	0.542198	0.123328	7.13036	6.54615
2610528A11Rik_CCDS56949.1_ex1_14:37107417-37107439:+_5-5	CGCCTGAGTTTCAAGGACT	2610528A11Rik	0.334061	0.475713	-0.207613	9.33229	10.7767
2610528J11Rik_CCDS18554.1_ex1_4:118529582-118529604:+_5-1	CTCTCCATTCTCATCGCGC	2610528J11Rik	0.00276338	0.0398115	-1.06064	8.4315	17.5869
2610528J11Rik_CCDS18554.1_ex1_4:118529624-118529646:-_5-2	GTAACTGGCATGGTATCGG	2610528J11Rik	0.146594	0.338353	-0.419469	11.0088	14.7235
2610528J11Rik_CCDS18554.1_ex1_4:118529638-118529660:-_5-3	AGCGGGCGATGCCTGTAAC	2610528J11Rik	0.0758436	0.250219	-0.746309	6.65495	11.1636
2610528J11Rik_CCDS18554.1_ex1_4:118529651-118529673:+_5-4	CGCCCGCTGTCCAGTGCAG	2610528J11Rik	0.517352	0.559371	0.0184451	23.1694	22.8751
2610528J11Rik_CCDS18554.1_ex1_4:118529673-118529695:+_5-5	GTGGGAACCGCCCACCGGT	2610528J11Rik	0.632121	0.63387	-0.471906	1	1.38694
2700029M09Rik_CCDS52553.1_ex1_8:60893754-60893776:+_5-1	AGTGACCTTCGAAAAGAAG	2700029M09Rik	0.342372	0.480185	-0.496997	3.8525	5.43692
2700029M09Rik_CCDS52553.1_ex2_8:60895510-60895532:-_5-2	CATTTTATGTTTCCCAGCA	2700029M09Rik	0.530312	0.567051	-0.0747783	7.88102	8.30029
2700029M09Rik_CCDS52553.1_ex2_8:60895551-60895573:+_5-3	GAACTGTAATCTTCACTGG	2700029M09Rik	0.433419	0.523921	0.104537	5.67909	5.28215
2700029M09Rik_CCDS52553.1_ex2_8:60895633-60895655:-_5-5	TTACCTGAAATACCCCATG	2700029M09Rik	0.397035	0.508509	-0.14897	8.8819	9.84805
2700049A03Rik_CCDS49081.1_ex1_12:71139711-71139733:-_5-1	TTACACTTTTCTTGGACGC	2700049A03Rik	0.0823169	0.253332	-0.545059	12.46	18.1802
2700049A03Rik_CCDS49081.1_ex10_12:71160340-71160362:+_5-4	GAAGCTATCGTTCGTGCAA	2700049A03Rik	0.0157747	0.10927	0.870449	15.7879	8.63563
2700049A03Rik_CCDS49081.1_ex13_12:71164447-71164469:-_5-5	TGCGGTGGCCCTGATAAAC	2700049A03Rik	0.249573	0.430654	0.274004	18.115	14.9815
2700049A03Rik_CCDS49081.1_ex7_12:71154821-71154843:-_5-2	GTACAGGGGCAAACCTGCG	2700049A03Rik	0.511409	0.556299	-0.0469186	9.75766	10.0802
2700049A03Rik_CCDS49081.1_ex9_12:71158889-71158911:-_5-3	CATCATTATACTTCGGCAC	2700049A03Rik	3.22e-07	9.43e-05	-2.42823	2.8266	15.2136
2700050L05Rik_CCDS21932.2_ex1_7:133638973-133638995:-_5-1	GTGCAAACGCTGTTCGAGG	2700050L05Rik	0.54856	0.579687	-0.047156	9.03203	9.33213
2700050L05Rik_CCDS21932.2_ex1_7:133639039-133639061:+_5-2	TACGAGAGAGTGCCAAACT	2700050L05Rik	0.00427479	0.0501449	0.939032	22.2936	11.628
2700050L05Rik_CCDS21932.2_ex2_7:133640674-133640696:-_5-3	ATACGCCATGCCGAAACTA	2700050L05Rik	0.372783	0.496621	0.204628	13.3108	11.5506
2700050L05Rik_CCDS21932.2_ex7_7:133647444-133647466:-_5-4	TGAGACGTAAGCTAACTGC	2700050L05Rik	6.07e-05	0.0035265	1.4603	19.7164	7.16526
2700050L05Rik_CCDS21932.2_ex8_7:133648276-133648298:+_5-5	CATGTTAACGGGATCGTAC	2700050L05Rik	5.52e-05	0.0033073	1.12822	31.902	14.5945
2700060E02Rik_CCDS26839.1_ex2_14:19814569-19814591:-_5-1	GTTCAGGAACGTCTAACAC	2700060E02Rik	0.0189882	0.117173	-2.15597	1	4.45667
2700060E02Rik_CCDS26839.1_ex3_14:19816243-19816265:+_5-2	TGACACCCGCCTTAAAATC	2700060E02Rik	0.00365985	0.0457028	-2.24502	1	4.74043
2700060E02Rik_CCDS26839.1_ex5_14:19819915-19819937:-_5-3	TAGCTGTTAGACTTGAATA	2700060E02Rik	0.387513	0.503635	0.336721	2.8266	2.23821
2700060E02Rik_CCDS26839.1_ex5_14:19819965-19819987:-_5-4	TCCTTTCAAGATTCAGGAT	2700060E02Rik	0.337791	0.477838	0.271193	7.93107	6.57195
2700060E02Rik_CCDS26839.1_ex6_14:19822565-19822587:-_5-5	TGGCCCAAGTTCTTTGAAA	2700060E02Rik	0.204494	0.396201	0.48158	6.65495	4.76623
2700062C07Rik_CCDS29101.1_ex1_18:24471067-24471089:+_5-1	CTACAGTTCGACACACGGT	2700062C07Rik	0.299787	0.453833	-0.331962	8.13124	10.235
2700062C07Rik_CCDS29101.1_ex2_18:24473053-24473075:+_5-2	ATACAGAAACTTCTTAATC	2700062C07Rik	0.264241	0.430654	-1.04099	1	2.05764
2700062C07Rik_CCDS29101.1_ex2_18:24473133-24473155:+_5-3	CTCTACAAGTGTGCTGGTA	2700062C07Rik	0.264241	0.430654	-0.672026	1	1.59331
2700062C07Rik_CCDS29101.1_ex3_18:24475671-24475693:-_5-5	ACCATTTGTACTCTGACCG	2700062C07Rik	0.170082	0.363369	-0.476623	7.856	10.9315
2700081O15Rik_CCDS29524.2_ex1_19:7420103-7420125:-_5-1	GGTAGGGGGGTACTCCCCC	2700081O15Rik	0.539836	0.573423	-0.0991502	6.93019	7.42322
2700081O15Rik_CCDS29524.2_ex2_19:7421285-7421307:+_5-2	CCAGCGGCGAGGGGTCCGA	2700081O15Rik	0.00760689	0.0709965	-0.906299	10.0579	18.8509
2700081O15Rik_CCDS29524.2_ex2_19:7421309-7421331:+_5-3	CTCAGTGGCACCTCGGCGC	2700081O15Rik	0.406666	0.512661	-0.096818	18.6404	19.9343
2700081O15Rik_CCDS29524.2_ex2_19:7421331-7421353:+_5-4	CGCCTCGCAGCCTCCCGAA	2700081O15Rik	0.122004	0.308401	-0.500337	12.3599	17.4837
2700081O15Rik_CCDS29524.2_ex2_19:7421437-7421459:+_5-5	TCATGGACTACGACCCACG	2700081O15Rik	0.388754	0.504339	0.119216	14.7871	13.6143
2700089E24Rik_CCDS51934.1_ex0_6:133105505-133105527:-_3-1	AAGAAGGCGAGCAGGGTGC	2700089E24Rik	0.554422	0.58422	-0.0163348	2.90166	2.9347
2700089E24Rik_CCDS51934.1_ex0_6:133105517-133105539:+_3-2	CGCCTTCTTCGAGCTGGCC	2700089E24Rik	0.403833	0.511559	0.0489228	50.6434	48.9549
2700089E24Rik_CCDS51934.1_ex0_6:133105535-133105557:-_3-3	AAGTTCATGCGCAGCTGCC	2700089E24Rik	0.260549	0.430654	0.284002	15.0373	12.3503
2700094K13Rik_CCDS16187.1_ex1_2:84670284-84670306:-_5-1	AACCCGTCCAAACCGCGGA	2700094K13Rik	0.140038	0.330594	0.593812	11.3591	7.5264
2700094K13Rik_CCDS16187.1_ex1_2:84670304-84670326:+_5-2	TCACTTGCACAGGTAGCTC	2700094K13Rik	0.452884	0.531567	0.0534485	9.65758	9.30633
2700094K13Rik_CCDS16187.1_ex1_2:84670326-84670348:+_5-3	GGCCTCCAGTTGCAGAGCC	2700094K13Rik	0.221712	0.411772	-0.274071	19.2159	23.2362
2700094K13Rik_CCDS16187.1_ex1_2:84670370-84670392:-_5-4	GTACGAGCTGACGCGTGTA	2700094K13Rik	0.47262	0.539119	0.0406097	6.67997	6.49456
2700094K13Rik_CCDS16187.1_ex2_2:84670477-84670499:-_5-5	TGGTCATTGAGCATTGGTG	2700094K13Rik	0.428061	0.521662	0.106385	19.266	17.8964
2700097O09Rik_CCDS25912.1_ex4_12:55059444-55059466:+_5-1	GCTGCACTTTACCCCATAA	2700097O09Rik	2.23e-05	0.00176457	1.31764	26.7976	10.7509
2700097O09Rik_CCDS25912.1_ex4_12:55059485-55059507:-_5-2	GAAAGGTCTTGGTTGACGT	2700097O09Rik	0.0212964	0.125347	1.28042	8.13124	3.34744
2700097O09Rik_CCDS25912.1_ex4_12:55059534-55059556:+_5-3	AATGAACTTCAACTCCGTG	2700097O09Rik	0.214986	0.405836	-0.509641	6.55486	9.33213
2700097O09Rik_CCDS25912.1_ex5_12:55061111-55061133:-_5-4	TTGATACATTATGTGAGGA	2700097O09Rik	0.431133	0.522584	-0.0947537	3.35206	3.57961
2700097O09Rik_CCDS25912.1_ex6_12:55062999-55063021:-_5-5	GTGCTTTGCTCGGAACATC	2700097O09Rik	0.144728	0.335979	0.436359	14.8621	10.9831
2810004N23Rik_CCDS22775.1_ex3_8:124841701-124841723:+_5-1	GATAGCTCGCTCCCGCTCC	2810004N23Rik	0.264241	0.430654	-0.695197	1	1.61911
2810004N23Rik_CCDS22775.1_ex3_8:124841749-124841771:-_5-2	GTACACCGCTTTGGGATCA	2810004N23Rik	0.495851	0.548185	-0.227482	3.65232	4.2761
2810004N23Rik_CCDS22775.1_ex4_8:124842389-124842411:-_5-3	AAGGTCGTTAAAAAAGATG	2810004N23Rik	0.264241	0.430654	1.24866	2.3762	1
2810004N23Rik_CCDS22775.1_ex5_8:124861148-124861170:-_5-4	TGCCTGGATCTCCTGTACG	2810004N23Rik	0.0229908	0.130691	0.830273	16.0882	9.04837
2810004N23Rik_CCDS22775.1_ex6_8:124862876-124862898:+_5-5	ACGCTCACCCAGGTCGTAG	2810004N23Rik	0.00128322	0.0246771	-1.96206	2.05092	7.99073
2810006K23Rik_CCDS51647.1_ex0_5:124338740-124338762:+_5-1	GCACTGCTCTTCCCAGGAA	2810006K23Rik	0.292787	0.449569	-0.250041	9.90779	11.7828
2810006K23Rik_CCDS51647.1_ex0_5:124338800-124338822:-_5-2	ATTCAGGGGGAGCAGAGCA	2810006K23Rik	0.0622218	0.227354	-1.32301	2.10096	5.25635
2810006K23Rik_CCDS51647.1_ex0_5:124338813-124338835:-_5-3	CGAGCTCACTCTCATTCAG	2810006K23Rik	0.0512902	0.204449	-1.0387	4.00263	8.2229
2810006K23Rik_CCDS51647.1_ex0_5:124338831-124338853:+_5-4	TCGAAGAACAGTTCGTGAA	2810006K23Rik	0.182254	0.375983	1.10597	3.15188	1.46433
2810006K23Rik_CCDS51647.1_ex0_5:124338900-124338922:+_5-5	TGCTCAAACACGTGCCCTC	2810006K23Rik	0.161179	0.354497	-0.677645	5.25372	8.40347
2810007J24Rik_CCDS20833.1_ex3_7:14423490-14423512:-_5-1	ACTTCAATGCTCTAAAACA	2810007J24Rik	0.32496	0.469968	0.442701	2.72651	2.00605
2810007J24Rik_CCDS20833.1_ex4_7:14425462-14425484:-_5-2	TGCCAATGAGCGCACACCA	2810007J24Rik	0.555944	0.585249	-0.0267737	15.2124	15.4974
2810007J24Rik_CCDS20833.1_ex4_7:14425483-14425505:+_5-3	ATTGTAGATTGGACCCATG	2810007J24Rik	0.217046	0.407652	0.426395	8.83185	6.57195
2810007J24Rik_CCDS20833.1_ex4_7:14425530-14425552:+_5-4	GACAATTTCATTCAACCAG	2810007J24Rik	0.000395672	0.0118965	-1.46971	5.27874	14.6203
2810007J24Rik_CCDS20833.1_ex5_7:14427783-14427805:-_5-5	TAGTGACTTATCCAAAATC	2810007J24Rik	0.264241	0.430654	-0.718001	1	1.6449
2810021J22Rik_CCDS24751.1_ex3_11:58880112-58880134:+_5-1	ATCTGAGGTGCTTGATACA	2810021J22Rik	0.473657	0.539591	-0.089115	12.435	13.2273
2810021J22Rik_CCDS24751.1_ex3_11:58880217-58880239:-_5-2	CTAAGAGGCGCGGGAGGTC	2810021J22Rik	0.228829	0.417362	0.228732	32.4275	27.6731
2810021J22Rik_CCDS24751.1_ex3_11:58880298-58880320:-_5-3	CATACAGTGCGCACATCGA	2810021J22Rik	0.0599495	0.22281	0.366109	46.3397	35.9537
2810021J22Rik_CCDS24751.1_ex3_11:58880336-58880358:-_5-4	TCGTCGAGCTGTCTCCCAA	2810021J22Rik	0.275964	0.438171	0.262388	16.1132	13.4337
2810021J22Rik_CCDS24751.1_ex3_11:58880441-58880463:-_5-5	GGTTACACGTGTCAGAGAA	2810021J22Rik	0.318843	0.466118	-0.253742	8.28137	9.87385
2810403A07Rik_CCDS17483.1_ex2_3:88689182-88689204:-_5-1	CTAGTTAGGCTTTTGCCAG	2810403A07Rik	1.57e-05	0.00138436	-1.1339	16.8889	37.0629
2810403A07Rik_CCDS17483.1_ex3_3:88689639-88689661:+_5-2	GGGCTGCTGTGTCAACTCG	2810403A07Rik	0.250754	0.430654	-0.210367	17.7647	20.5534
2810403A07Rik_CCDS17483.1_ex5_3:88693486-88693508:-_5-3	CTGTTGCACCATTGAAAGT	2810403A07Rik	0.0442275	0.188728	-0.973652	5.30377	10.4156
2810403A07Rik_CCDS17483.1_ex5_3:88693575-88693597:-_5-4	GCCAAAACCTACTCCGGAC	2810403A07Rik	0.110835	0.293995	0.541817	14.0364	9.64168
2810403A07Rik_CCDS17483.1_ex6_3:88696686-88696708:+_5-5	TGCCAAAGTCTTTCTACGA	2810403A07Rik	0.174899	0.368741	-0.494443	7.90604	11.1379
2810408A11Rik_CCDS24920.1_ex8_11:69900297-69900319:+_5-1	CTTACTTCTCCGAACCGGG	2810408A11Rik	0.521423	0.561875	-0.0237264	21.9183	22.2818
2810408A11Rik_CCDS24920.1_ex8_11:69900431-69900453:-_5-2	AACTAAGGCGTCCACCCCC	2810408A11Rik	0.369501	0.495194	0.19	16.4135	14.3882
2810408A11Rik_CCDS24920.1_ex8_11:69900497-69900519:+_5-3	ACCTCCTGAAGTTGCGGAG	2810408A11Rik	0.0107923	0.0875633	0.906311	16.8138	8.97098
2810408A11Rik_CCDS24920.1_ex8_11:69900613-69900635:+_5-4	GCGAAGCAAGGCTACTCCG	2810408A11Rik	0.00599792	0.061214	1.82162	7.45565	2.10923
2810408A11Rik_CCDS24920.1_ex8_11:69900630-69900652:-_5-5	CAGACACCGGATTACCCCC	2810408A11Rik	0.00614815	0.0621426	0.882057	22.1435	12.0149
Trp53rk_CCDS17090.1_ex1_2:166795416-166795438:+_5-5	GCGTCTAACTGCTTATATA	Trp53rk	0.632121	0.63387	-0.389074	1	1.30955
2810408M09Rik_CCDS17082.1_ex0_2:165491655-165491677:-_5-1	GCGTCTAACTGCTTATATA	2810408M09Rik	0.632121	0.63387	-0.389074	1	1.30955
2810408M09Rik_CCDS17082.1_ex1_2:165493077-165493099:-_5-2	CGGCGGCGGACAGTGCAGG	2810408M09Rik	0.38679	0.503587	0.141535	13.9363	12.634
2810408M09Rik_CCDS17082.1_ex1_2:165493119-165493141:-_5-3	CCGAAGAGCTACCGGCACC	2810408M09Rik	0.264241	0.430654	-1.28959	1	2.44458
Trp53rk_CCDS17090.1_ex0_2:166793947-166793969:-_5-2	GTGCTTCACCACGGCCGCG	Trp53rk	0.392809	0.506417	0.29122	6.17953	5.04998
2810408M09Rik_CCDS17082.1_ex1_2:165493146-165493168:+_5-4	GTGCTTCACCACGGCCGCG	2810408M09Rik	0.392809	0.506417	0.29122	6.17953	5.04998
2810417H13Rik_CCDS23299.1_ex1_9:65890792-65890814:+_5-1	AAGTTCGTCGAGAAAAGGT	2810417H13Rik	0.195156	0.387955	-0.372637	9.85775	12.763
2810417H13Rik_CCDS23299.1_ex2_9:65893421-65893443:+_5-4	AAGTGGCAAAAAGGCATCG	2810417H13Rik	0.341388	0.479961	-0.260754	8.45653	10.1318
2810417H13Rik_CCDS23299.1_ex2_9:65893457-65893479:+_5-5	TCCCCTAAAGAGTCTAAAA	2810417H13Rik	0.0803014	0.250219	-1.42048	1	2.67674
2810428I15Rik_CCDS22370.1_ex2_8:70505805-70505827:+_5-1	CGAGCACCGGTTGCGCTCG	2810428I15Rik	0.00035115	0.0110129	0.824442	44.1628	24.9387
2810428I15Rik_CCDS22370.1_ex2_8:70505890-70505912:-_5-2	TACCGGAGTGTCGTGCACG	2810428I15Rik	0.0299394	0.151884	1.06969	10.3832	4.9468
2810428I15Rik_CCDS22370.1_ex3_8:70506489-70506511:+_5-3	CGCTCACTGGTCTAGACGG	2810428I15Rik	0.361552	0.490769	0.115588	16.5386	15.2652
2810428I15Rik_CCDS22370.1_ex3_8:70506516-70506538:-_5-4	CTTCAGAATGAACGCGCAC	2810428I15Rik	0.14764	0.339537	0.472252	12.9104	9.30633
2810428I15Rik_CCDS22370.1_ex3_8:70506555-70506577:-_5-5	GACGCCCCGATCGCTACAC	2810428I15Rik	0.41973	0.517943	-0.313958	5.20368	6.46877
2810459M11Rik_CCDS48302.1_ex0_1:86046120-86046142:-_5-1	TCCGGCGGGAACACGGCAC	2810459M11Rik	0.237525	0.42447	0.26348	16.7138	13.9238
2810459M11Rik_CCDS48302.1_ex0_1:86046192-86046214:+_5-2	GGCGGCCACCGAGTCGCAC	2810459M11Rik	0.492625	0.546795	-0.0227083	10.6084	10.7767
2810459M11Rik_CCDS48302.1_ex0_1:86046257-86046279:+_5-3	TTTTCGTGCTGTGCCGCGT	2810459M11Rik	0.175833	0.369493	-0.283215	23.9701	29.1693
2810459M11Rik_CCDS48302.1_ex0_1:86046274-86046296:+_5-4	GTCGGATCGCTGACCTCCC	2810459M11Rik	0.0300164	0.152008	0.741453	16.9389	10.1318
2810459M11Rik_CCDS48302.1_ex0_1:86046357-86046379:-_5-5	ACCAGCACTCCGACCAGCG	2810459M11Rik	0.296914	0.452314	-0.222919	18.3402	21.4047
2810474O19Rik_CCDS20717.1_ex0_6:149325888-149325910:+_5-1	ATCTCATAATCCCGACGGA	2810474O19Rik	0.490646	0.545882	-0.0462544	12.5851	12.9952
2810474O19Rik_CCDS20717.1_ex0_6:149326145-149326167:-_5-2	CTTGTAATGATGTAGTAGC	2810474O19Rik	0.0259669	0.140348	0.948363	12.0347	6.2366
2810474O19Rik_CCDS20717.1_ex0_6:149326915-149326937:+_5-3	AGAATCAGTACAACCGTAG	2810474O19Rik	0.513645	0.557	0.0841397	1.82572	1.72229
2810474O19Rik_CCDS20717.1_ex0_6:149327033-149327055:-_5-4	CACAGCTCGGTATGAGAAC	2810474O19Rik	0.021999	0.127717	0.942001	11.6843	6.08182
2810474O19Rik_CCDS20717.1_ex0_6:149327438-149327460:-_5-5	TACTTTCGATTTGTAACAT	2810474O19Rik	0.0803014	0.250219	-1.69789	1	3.24426
2900011O08Rik_CCDS27971.1_ex1_16:14049384-14049406:-_5-1	CATGGAGATGATGTCTAGC	2900011O08Rik	0.0738128	0.248299	0.589954	15.9881	10.6219
2900011O08Rik_CCDS27971.1_ex1_16:14049456-14049478:-_5-2	CAGGACTTCACGGAGACGC	2900011O08Rik	0.265405	0.431488	-0.244018	19.8165	23.4684
2900011O08Rik_CCDS27971.1_ex1_16:14049474-14049496:-_5-3	TTCTGACTCTCGACGGACC	2900011O08Rik	0.285972	0.444785	-0.357975	8.93194	11.4474
2900011O08Rik_CCDS27971.1_ex2_16:14088998-14089020:+_5-4	AGAACTTGGTCGCCATCCC	2900011O08Rik	0.203329	0.395518	-0.311013	13.5109	16.7614
2900011O08Rik_CCDS27971.1_ex3_16:14093985-14094007:+_5-5	CGAGGTGGAACGCTTAAGG	2900011O08Rik	0.147146	0.339113	-0.676545	5.12861	8.1971
2900026A02Rik_CCDS39217.1_ex4_5:113097667-113097689:+_5-1	GTGGACTCCAGCTCGGAAC	2900026A02Rik	0.495267	0.547977	0.0100635	11.7094	11.628
2900026A02Rik_CCDS39217.1_ex4_5:113097738-113097760:-_5-2	TATACCGAGTCCACGTCGG	2900026A02Rik	0.383636	0.502268	0.240752	8.13124	6.8815
2900026A02Rik_CCDS39217.1_ex4_5:113097810-113097832:+_5-3	GTCAGGAGACGGAGACTCG	2900026A02Rik	0.518334	0.559998	0.160551	4.2028	3.76018
2900026A02Rik_CCDS39217.1_ex5_5:113101463-113101485:-_5-4	GCAGACCAGCACCAGAACG	2900026A02Rik	0.0379472	0.173762	0.727566	17.2893	10.4414
2900026A02Rik_CCDS39217.1_ex5_5:113101485-113101507:-_5-5	CGACAGCCAGTATGGGACC	2900026A02Rik	0.138232	0.328556	-0.410294	13.4859	17.9222
2900092C05Rik_CCDS20811.1_ex1_7:12512901-12512923:-_5-1	ATGCAAAGACTTACGTGCT	2900092C05Rik	0.418499	0.517362	-0.198448	6.15451	7.06207
2900092C05Rik_CCDS20811.1_ex2_7:12515461-12515483:-_5-2	ATTCTGATGGCTTCACAGT	2900092C05Rik	0.065331	0.233246	0.492496	22.8191	16.2197
2900092C05Rik_CCDS20811.1_ex3_7:12550480-12550502:+_5-4	CAGTAATTCCACGTAGGCC	2900092C05Rik	0.0503321	0.202663	0.463443	28.6242	20.7598
2900092C05Rik_CCDS20811.1_ex3_7:12550571-12550593:-_5-5	TATACTTACTATATCACGT	2900092C05Rik	0.349698	0.484035	0.270552	3.60228	2.9863
3010026O09Rik_CCDS48784.1_ex4_11:50196956-50196978:-_5-1	TCAACCAACGGGACTCGAG	3010026O09Rik	0.574106	0.600209	0.0390902	9.48242	9.22894
3010026O09Rik_CCDS48784.1_ex4_11:50197041-50197063:+_5-2	GCTTTCAACCAGTGCTGAG	3010026O09Rik	0.152135	0.344594	0.295547	29.9754	24.4228
3010026O09Rik_CCDS48784.1_ex5_11:50197617-50197639:+_5-3	GGAAATGGAATCAGCGCAC	3010026O09Rik	0.383434	0.502159	-0.18767	6.88015	7.83596
3010026O09Rik_CCDS48784.1_ex6_11:50199524-50199546:+_5-4	CTTACTTTCAGGACTCCAC	3010026O09Rik	0.0732403	0.24736	-0.382036	29.4499	38.3785
3010026O09Rik_CCDS48784.1_ex6_11:50199577-50199599:-_5-5	GTTCGCAGTACTGAGGGCA	3010026O09Rik	0.0633236	0.229477	-0.535097	14.4868	20.9919
3110001D03Rik_CCDS18288.1_ex1_4:75278045-75278067:-_5-1	CTACGTCTATTTGGTGGCC	3110001D03Rik	0.522604	0.562348	0.00953505	37.2567	37.0113
3110001D03Rik_CCDS18288.1_ex1_4:75278074-75278096:-_5-2	TCGGGCTCTACACTCTTCG	3110001D03Rik	0.410978	0.514227	0.282874	7.43063	6.10762
3110001D03Rik_CCDS18288.1_ex1_4:75278091-75278113:-_5-3	GGAGTTGTCGCGTGCTGTC	3110001D03Rik	0.556064	0.585285	0.0117033	15.3375	15.2136
3110001D03Rik_CCDS18288.1_ex1_4:75278111-75278133:-_5-4	CCCTGAGTTAAAAACCTGC	3110001D03Rik	0.363046	0.491451	0.189074	8.75679	7.68118
3110001D03Rik_CCDS18288.1_ex1_4:75278152-75278174:+_5-5	CACGGCGGATTTCGCGGGT	3110001D03Rik	0.0983025	0.276781	0.494309	18.0149	12.7888
3110001I22Rik_CCDS37260.1_ex0_16:13677187-13677209:+_5-1	AAGCCAACAGCATGAGTGC	3110001I22Rik	0.0289468	0.148927	-1.0812	4.22782	8.94519
3110001I22Rik_CCDS37260.1_ex0_16:13677376-13677398:+_5-2	CAAACTGCATTCTTCCCAT	3110001I22Rik	0.0269072	0.14306	-0.754464	9.2322	15.5748
3110001I22Rik_CCDS37260.1_ex0_16:13677430-13677452:-_5-3	TCACTGTGCCGTTTGTAGG	3110001I22Rik	0.0860413	0.258611	-0.388609	23.7199	31.0524
3110001I22Rik_CCDS37260.1_ex0_16:13677583-13677605:+_5-5	ACGTCCTAAAGCTGCAAGC	3110001I22Rik	9.37e-06	0.0010176	-1.64399	6.2546	19.5474
3110002H16Rik_CCDS29063.1_ex6_18:12179560-12179582:-_5-1	CGCAATGTCTCGTTCTGAA	3110002H16Rik	0.242621	0.428343	-0.283569	12.1598	14.8009
3110002H16Rik_CCDS29063.1_ex7_18:12180527-12180549:+_5-2	ACGTCTAACAGCACGGGAG	3110002H16Rik	0.0129312	0.0970946	-0.872173	9.15714	16.7614
3110002H16Rik_CCDS29063.1_ex8_18:12180741-12180763:+_5-3	CTGGTCGTTGTCCACCATC	3110002H16Rik	0.220707	0.410904	0.281234	22.2186	18.2834
3110002H16Rik_CCDS29063.1_ex9_18:12181593-12181615:+_5-4	TATTTGACATCAGGCTACG	3110002H16Rik	0.327468	0.471886	-0.161975	14.9122	16.684
3110002H16Rik_CCDS29063.1_ex9_18:12181670-12181692:+_5-5	CAACCTTACGAGATCCCCC	3110002H16Rik	0.236015	0.423131	-0.294588	11.1839	13.7175
3110009E18Rik_CCDS15232.1_ex0_1:120150701-120150723:+_6-1	AACTTGCATCAAACTGTAA	3110009E18Rik	0.60937	0.632743	0.207669	2.3762	2.05764
3110009E18Rik_CCDS15232.1_ex0_1:120150726-120150748:+_6-2	TTATAATATTTCTAAAGCA	3110009E18Rik	0.632121	0.63387	0	1	1
3110009E18Rik_CCDS15232.1_ex1_1:120160610-120160632:-_6-3	TGGCAGGCTGGTCCTCAAA	3110009E18Rik	0.0148744	0.105645	0.849064	16.7638	9.30633
3110009E18Rik_CCDS15232.1_ex1_1:120160635-120160657:-_6-4	CGTATTTGTAATTTCTGAG	3110009E18Rik	0.203653	0.395606	-0.63087	3.92756	6.08182
3110009E18Rik_CCDS15232.1_ex2_1:120166151-120166173:+_6-5	CATCAAGCTCACAAAGCAA	3110009E18Rik	0.409922	0.514062	0.343861	5.32879	4.19871
3110009E18Rik_CCDS15232.1_ex3_1:120171430-120171452:+_6-6	GACGACACACTCCTGCTAA	3110009E18Rik	0.223595	0.413238	0.270264	20.9925	17.4063
3110035E14Rik_CCDS14813.1_ex2_1:9613325-9613347:+_5-1	CGACCTGTACCCGCCACCA	3110035E14Rik	0.500261	0.550302	-0.0348599	24.6707	25.2741
3110035E14Rik_CCDS14813.1_ex2_1:9613349-9613371:-_5-2	CGTTGAGGCAGTAGCTCCA	3110035E14Rik	0.237373	0.424256	0.362117	10.9337	8.50665
3110035E14Rik_CCDS14813.1_ex2_1:9613362-9613384:+_5-3	CCTCAACGCTGTGAGCGCA	3110035E14Rik	0.425307	0.520313	-0.0542617	23.7449	24.655
3110035E14Rik_CCDS14813.1_ex2_1:9613393-9613415:+_5-4	ACCGCAGATGGTTGCAGAC	3110035E14Rik	0.306224	0.458203	0.234956	18.3902	15.6264
3110035E14Rik_CCDS14813.1_ex2_1:9613438-9613460:-_5-5	TTTTGGTGGGATGCGCCCC	3110035E14Rik	0.29967	0.453815	0.188593	19.8665	17.4321
3110040N11Rik_CCDS40010.1_ex1_7:81786155-81786177:+_5-1	TCGGACGGAGGTGCTGCAA	3110040N11Rik	0.170693	0.363825	0.301321	24.946	20.2439
3110040N11Rik_CCDS40010.1_ex1_7:81786167-81786189:+_5-2	GCTGCAATGGCCACACCAA	3110040N11Rik	0.0131382	0.0981825	-0.827863	9.90779	17.5869
3110040N11Rik_CCDS40010.1_ex1_7:81786190-81786212:-_5-3	TTCCTAGATCTGAGCACTG	3110040N11Rik	0.397877	0.508751	-0.120686	12.7353	13.8464
3110040N11Rik_CCDS40010.1_ex2_7:81788448-81788470:+_5-4	CCTGTCACAGCGTTCTGTC	3110040N11Rik	0.394097	0.507054	0.138127	11.8595	10.7767
3110040N11Rik_CCDS40010.1_ex2_7:81788473-81788495:-_5-5	TAGCCATTCATGCCAAACC	3110040N11Rik	0.0437632	0.188066	-0.631694	11.4341	17.7158
3110043O21Rik_CCDS38708.1_ex5_4:35211319-35211341:+_5-1	ACTACAACGGAACAGCCAC	3110043O21Rik	0.13365	0.32296	-0.486869	11.6843	16.3745
3110043O21Rik_CCDS38708.1_ex9_4:35218433-35218455:-_5-2	TAACACACATTATTCGAAA	3110043O21Rik	0.632121	0.63387	-0.417217	1	1.33535
3110043O21Rik_CCDS38708.1_ex9_4:35218461-35218483:+_5-3	AACACACACTCTGTGAAGT	3110043O21Rik	0.00104109	0.0215028	-1.72611	2.97673	9.84805
3110043O21Rik_CCDS38708.1_ex9_4:35218549-35218571:-_5-4	ATTAATCTTCGACGGAAAC	3110043O21Rik	0.632121	0.63387	-0.389074	1	1.30955
3110043O21Rik_CCDS38708.1_ex9_4:35218652-35218674:-_5-5	TTGCCAACCACACTCTAAA	3110043O21Rik	0.279035	0.440243	0.270503	9.60753	7.96494
3110047P20Rik_CCDS51508.1_ex0_5:63650273-63650295:+_5-1	ACCCGCCGGTCGCAGCGTC	3110047P20Rik	0.158125	0.3512	0.37842	14.5118	11.1636
3110047P20Rik_CCDS51508.1_ex5_5:63800031-63800053:-_5-2	CAAACTCATCCTCGATAGC	3110047P20Rik	1.12e-06	0.000218338	1.97837	19.3911	4.921
3110047P20Rik_CCDS51508.1_ex5_5:63800559-63800581:-_5-3	GTCCCCCATACACAACGAG	3110047P20Rik	0.209095	0.400627	0.455438	10.108	7.37163
3110047P20Rik_CCDS51508.1_ex6_5:63804541-63804563:-_5-4	AAACAAGTCACGAAGGTCG	3110047P20Rik	0.239572	0.425772	-0.51977	5.87927	8.42927
3110047P20Rik_CCDS51508.1_ex6_5:63805412-63805434:-_5-5	CGAGGCAGCCATTCAAGTA	3110047P20Rik	0.449326	0.530269	0.0819334	12.9354	12.2213
3110052M02Rik_CCDS49994.1_ex1_17:21659026-21659048:-_5-1	GTTCTCACCGACAGAGACC	3110052M02Rik	0.0633736	0.229518	1.09282	5.92931	2.77993
3110052M02Rik_CCDS49994.1_ex2_17:21661324-21661346:-_5-2	TGATGAACAGTATCACATG	3110052M02Rik	0.264241	0.430654	-1.22737	1	2.3414
3110052M02Rik_CCDS49994.1_ex2_17:21661486-21661508:-_5-3	TGGTTTGATGAGTCAACAG	3110052M02Rik	0.0623217	0.227433	0.836491	11.4592	6.41717
3110052M02Rik_CCDS49994.1_ex2_17:21661505-21661527:-_5-4	GATGCTCCTATGTCTGCAT	3110052M02Rik	0.112636	0.29624	0.581207	10.7585	7.19105
3110052M02Rik_CCDS49994.1_ex2_17:21661732-21661754:+_5-5	ATGTTTCAGTACCTCCTCA	3110052M02Rik	0.454596	0.532435	-0.0304624	11.284	11.5248
3110057O12Rik_CCDS38422.2_ex1_3:40905902-40905924:+_5-1	CGAGAAAGGTGCCAGAACC	3110057O12Rik	4.77e-08	2.16e-05	-2.99667	1.45039	11.5764
3110057O12Rik_CCDS38422.2_ex1_3:40905920-40905942:-_5-2	CGGGTAGTCACTTGAAACC	3110057O12Rik	0.011063	0.0887973	-1.65421	1.82572	5.74648
3110057O12Rik_CCDS38422.2_ex1_3:40905935-40905957:+_5-3	TACCCGGTACACATCGATA	3110057O12Rik	0.0189882	0.117173	-1.85016	1	3.6054
3110057O12Rik_CCDS38422.2_ex7_3:40930141-40930163:-_5-4	CAGTTGGACACTGCTAAGG	3110057O12Rik	0.493733	0.547302	0.0657196	4.85337	4.63724
3110057O12Rik_CCDS38422.2_ex7_3:40930170-40930192:-_5-5	GGCATGGAATCAACGGCAT	3110057O12Rik	6.29e-05	0.00361496	2.47013	9.25723	1.6707
3110062M04Rik_CCDS19997.1_ex1_6:34875524-34875546:+_5-1	GACAGATGTTACCTCAATC	3110062M04Rik	0.0750143	0.250219	0.99662	5.8042	2.90891
3110062M04Rik_CCDS19997.1_ex1_6:34875550-34875572:-_5-2	AAATGGTAGACGTGGCACT	3110062M04Rik	0.0145782	0.104454	0.693038	24.8459	15.3684
3110062M04Rik_CCDS19997.1_ex1_6:34875586-34875608:+_5-3	AGTACACGGTCTCCGTGGC	3110062M04Rik	0.278513	0.439811	-0.239004	18.115	21.3789
3110062M04Rik_CCDS19997.1_ex2_6:34876551-34876573:-_5-4	CCGCCTGGGCCCAGAGAGT	3110062M04Rik	0.156349	0.348947	0.506728	12.1598	8.55825
3110062M04Rik_CCDS19997.1_ex2_6:34876564-34876586:-_5-5	AGGAAGCAGACAGCCGCCT	3110062M04Rik	0.0295163	0.150637	0.558487	26.6224	18.077
3110079O15Rik_CCDS48305.1_ex1_1:87475050-87475072:-_5-1	TCAATAGGCTCGTTCCACA	3110079O15Rik	0.0697318	0.241162	0.715803	13.3358	8.11971
3110079O15Rik_CCDS48305.1_ex1_1:87475064-87475086:-_5-2	CACCAGAGGGCAATTCAAT	3110079O15Rik	0.372269	0.496407	-0.282058	6.80508	8.27449
3110079O15Rik_CCDS48305.1_ex1_1:87475076-87475098:-_5-3	CCAGGGGACCTTCACCAGA	3110079O15Rik	0.0131984	0.0984373	-0.988249	6.32966	12.5566
3110079O15Rik_CCDS48305.1_ex1_1:87475136-87475158:-_5-4	GAGCAGAGGTGGGGAACGG	3110079O15Rik	0.264241	0.430654	-1.30473	1	2.47038
3110079O15Rik_CCDS48305.1_ex1_1:87475185-87475207:-_5-5	CCTCCATCCTGGTCCACCC	3110079O15Rik	0.380979	0.501038	0.127475	26.3972	24.1649
3110082I17Rik_CCDS51684.1_ex2_5:139363988-139364010:+_5-1	GAGCCAGGGTGGCAGCCGA	3110082I17Rik	0.0755797	0.250219	-0.618117	8.23133	12.634
3110082I17Rik_CCDS51684.1_ex2_5:139364014-139364036:+_5-2	GCTGGCAGCGTCTGAACCT	3110082I17Rik	0.139331	0.329731	0.386338	16.5136	12.634
3110082I17Rik_CCDS51684.1_ex2_5:139364031-139364053:-_5-3	GCTGCTACACAGACTGCCA	3110082I17Rik	0.458338	0.533968	-0.0461334	13.2858	13.7175
3110082I17Rik_CCDS51684.1_ex2_5:139364127-139364149:+_5-4	CTCCTCTGGGGACAACTCA	3110082I17Rik	0.378328	0.499515	-0.335286	5.90429	7.44902
3110082I17Rik_CCDS51684.1_ex3_5:139455449-139455471:-_5-5	GAGACGCCGAGGACATCGG	3110082I17Rik	0.50598	0.553228	0.0598483	9.08207	8.71302
3110082J24Rik_CCDS57333.1_ex1_5:30105119-30105141:+_5-1	GGGGCTGATGCCCCGTGGA	3110082J24Rik	0.543056	0.575698	-0.0611727	10.0079	10.4414
3110082J24Rik_CCDS57333.1_ex1_5:30105149-30105171:-_5-2	CTGAGCCTCGGGAGTCACG	3110082J24Rik	0.0370446	0.171386	0.78394	13.9363	8.09392
3110082J24Rik_CCDS57333.1_ex1_5:30105220-30105242:+_5-3	CGCGCAGCCCGAGCTGCGC	3110082J24Rik	0.0803014	0.250219	-1.65126	1	3.14107
3110082J24Rik_CCDS57333.1_ex1_5:30105234-30105256:+_5-4	TGCGCGGGACTGGCCGTCG	3110082J24Rik	0.171611	0.365079	0.31111	20.6672	16.6582
3110082J24Rik_CCDS57333.1_ex1_5:30105255-30105277:+_5-5	GTCCCGGGACGGCGAACCC	3110082J24Rik	0.0021155	0.0337896	1.23986	16.3134	6.9073
3300002I08Rik_CCDS50740.1_ex0_2:150311212-150311234:-_4-1	TGTTTTCCCACCCAGGTCG	3300002I08Rik	0.416663	0.516777	-0.0688481	25.5965	26.8477
3300002I08Rik_CCDS50740.1_ex1_2:150344359-150344381:-_4-2	ATTATATTTAGGCTACAGT	3300002I08Rik	0.258631	0.430654	-0.385863	6.90517	9.02258
Zfp937_CCDS50738.1_ex2_2:150237017-150237039:+_3-1	ATTATATTTAGGCTACAGT	Zfp937	0.258631	0.430654	-0.385863	6.90517	9.02258
3425401B19Rik_CCDS49437.1_ex0_14:32662026-32662048:-_5-1	TCTGAAATGGGACCGGCTA	3425401B19Rik	0.386917	0.503587	-0.148106	12.6352	14.0012
3425401B19Rik_CCDS49437.1_ex0_14:32662357-32662379:-_5-2	TGGGGTCACCCTTCCCGAT	3425401B19Rik	0.0640521	0.230715	0.509643	21.8432	15.3426
3425401B19Rik_CCDS49437.1_ex0_14:32662863-32662885:-_5-3	CCTCAGGTGAAGCGGAGTA	3425401B19Rik	0.157749	0.350695	-0.300663	20.9174	25.7642
3425401B19Rik_CCDS49437.1_ex0_14:32663799-32663821:-_5-4	GTGTCGGGGACTTTTCACC	3425401B19Rik	0.358923	0.489438	-0.120644	20.9925	22.8235
3425401B19Rik_CCDS49437.1_ex0_14:32663874-32663896:-_5-5	CGAAGTCTGTGCATCTCGG	3425401B19Rik	0.307068	0.458539	0.183772	24.1953	21.3015
3632451O06Rik_CCDS36903.1_ex6_14:49773505-49773527:+_5-1	GGAACGACAGTAGTTCCCA	3632451O06Rik	0.246039	0.430654	0.359783	7.60578	5.92705
3632451O06Rik_CCDS36903.1_ex6_14:49773666-49773688:+_5-2	GACTGCTGCTACAATAGGC	3632451O06Rik	0.562143	0.590148	-0.172393	3.97761	4.48247
3632451O06Rik_CCDS36903.1_ex6_14:49773696-49773718:+_5-3	ACTGTTATAGGGTCCCTCC	3632451O06Rik	0.223155	0.41298	-0.609902	4.05267	6.18501
3632451O06Rik_CCDS36903.1_ex6_14:49773950-49773972:+_5-4	GTCCTTCAGATAGTACCAT	3632451O06Rik	0.308117	0.459383	0.404467	7.23045	5.46272
3632451O06Rik_CCDS36903.1_ex6_14:49774108-49774130:+_5-5	GCTTGACATCCTGTAGCCA	3632451O06Rik	0.479856	0.542002	-0.0715008	7.53071	7.91334
3830403N18Rik_CCDS30141.1_ex3_X:56147095-56147117:+_5-3	CACATAAAAAGAAAACGCA	3830403N18Rik	0.0208362	0.123517	1.47892	5.87927	2.10923
3830403N18Rik_CCDS30141.1_ex3_X:56147167-56147189:+_5-4	CTTTGGAAAACGAACAAAC	3830403N18Rik	0.264241	0.430654	1.10501	2.15101	1
3830406C13Rik_CCDS26817.1_ex1_14:12287314-12287336:+_7-2	TGGAGATGAAAACACAGAA	3830406C13Rik	0.264241	0.430654	-0.600195	1	1.51592
3830406C13Rik_CCDS26817.1_ex1_14:12287353-12287375:-_7-3	CTTCTAGAAGCAGTCTCAG	3830406C13Rik	0.207711	0.399229	0.317798	13.561	10.8799
3830406C13Rik_CCDS26817.1_ex1_14:12287378-12287400:-_7-4	AATTACCTTCAAGAGTCGG	3830406C13Rik	0.135514	0.325535	0.374646	19.6914	15.1878
3830406C13Rik_CCDS26817.1_ex2_14:12297578-12297600:+_7-5	CAGGACATAGATGCTGCAG	3830406C13Rik	0.389654	0.504996	-0.150558	12.6602	14.0528
3830406C13Rik_CCDS26817.1_ex2_14:12297613-12297635:-_7-6	TGTGGGTGTGGGATAAGCT	3830406C13Rik	0.558314	0.587305	-0.0608381	8.0812	8.42927
3830406C13Rik_CCDS26817.1_ex2_14:12297636-12297658:-_7-7	CCTCAAGAGAAAGCATCGA	3830406C13Rik	0.241999	0.428048	-0.54679	5.02853	7.34583
3830417A13Rik_CCDS30166.1_ex0_X:64177639-64177661:-_5-1	AAATAGAACCCATGGCAGT	3830417A13Rik	0.49382	0.547302	-0.056636	13.611	14.156
3830417A13Rik_CCDS30166.1_ex0_X:64177716-64177738:-_5-2	CTTTTCATTTAGTCCATCC	3830417A13Rik	0.402069	0.510882	-0.199175	7.00526	8.04232
3830417A13Rik_CCDS30166.1_ex0_X:64177758-64177780:-_5-3	CCTTCGAAACTTAACAAGC	3830417A13Rik	0.181937	0.375665	0.402132	11.6843	8.842
3830417A13Rik_CCDS30166.1_ex0_X:64177817-64177839:-_5-4	TGCTCCTCATAATCTCCCA	3830417A13Rik	0.375699	0.497942	0.186136	12.0847	10.6219
3830417A13Rik_CCDS30166.1_ex0_X:64177954-64177976:+_5-5	CCTATGACGGGATGCTACA	3830417A13Rik	0.0821984	0.253252	0.484974	20.9675	14.9815
4430402I18Rik_CCDS37948.1_ex3_19:28939134-28939156:-_5-1	AGCCTGGAGGCGAACATAA	4430402I18Rik	0.198465	0.390934	0.381257	14.0364	10.7767
4430402I18Rik_CCDS37948.1_ex4_19:28941777-28941799:+_5-2	CCAAATTATTTTCACCAAA	4430402I18Rik	0.257634	0.430654	0.318546	10.8336	8.68723
4430402I18Rik_CCDS37948.1_ex5_19:28944280-28944302:+_5-3	GTTGCGTTGAGTCGGCCGA	4430402I18Rik	0.473964	0.539703	-0.0274904	31.3015	31.9037
4430402I18Rik_CCDS37948.1_ex5_19:28944310-28944332:+_5-4	ACGTTGAGGGGAGGGTAAC	4430402I18Rik	0.568852	0.595605	-0.119119	5.05355	5.48851
4430402I18Rik_CCDS37948.1_ex7_19:28948651-28948673:-_5-5	TCACACCTTGGCATGCAGA	4430402I18Rik	0.000260001	0.00896392	-1.05364	14.5619	30.2269
4632428N05Rik_CCDS35912.1_ex1_10:60357933-60357955:-_5-1	ATCGTGCCCTTTGGACACG	4632428N05Rik	0.0593526	0.221728	-0.798178	5.60403	9.74487
4632428N05Rik_CCDS35912.1_ex1_10:60357970-60357992:+_5-2	CGTGGTACCTCAGCTCACG	4632428N05Rik	0.28463	0.444143	-0.303147	6.20455	7.65538
4632428N05Rik_CCDS35912.1_ex1_10:60358128-60358150:-_5-3	GATAGAGAAGTTACCGTGG	4632428N05Rik	0.201974	0.393986	0.583915	8.38146	5.5917
4632428N05Rik_CCDS35912.1_ex1_10:60358182-60358204:-_5-4	TATCACTAGACAGCAGTAG	4632428N05Rik	0.607601	0.63103	-0.0579832	2.05092	2.13503
4632428N05Rik_CCDS35912.1_ex1_10:60358218-60358240:-_5-5	GTAGAACCGTTGTTCTGGG	4632428N05Rik	0.449309	0.530269	0.0524598	19.8165	19.1088
4632434I11Rik_CCDS40022.1_ex0_7:92859482-92859504:+_5-1	GGTAGATCATCCCAAATCA	4632434I11Rik	0.472004	0.538925	0.0465243	10.7836	10.4414
4632434I11Rik_CCDS40022.1_ex0_7:92859613-92859635:+_5-2	GTAACATGCGATATCATAC	4632434I11Rik	1.13e-06	0.000218338	-3.18586	1	9.09996
4632434I11Rik_CCDS40022.1_ex0_7:92859668-92859690:+_5-3	TCTAAATTATGTTCCTCGA	4632434I11Rik	0.480444	0.542036	0.290457	4.37796	3.57961
4632434I11Rik_CCDS40022.1_ex0_7:92859899-92859921:+_5-4	TTTTGGTTAGGAGTACCAC	4632434I11Rik	0.0403146	0.179448	-1.20665	3.12686	7.21685
4632434I11Rik_CCDS40022.1_ex2_7:92862324-92862346:-_5-5	TACGGCCACTGGTTTACAC	4632434I11Rik	0.099189	0.277887	-1.04274	2.42625	4.99839
4732456N10Rik_CCDS27855.1_ex7_15:101560533-101560555:+_5-1	ATGGGCTCTAGATTGGTCC	4732456N10Rik	0.455035	0.532674	0.0794324	22.3437	21.1467
4732456N10Rik_CCDS27855.1_ex8_15:101562399-101562421:-_5-2	CTCCAGCGGGTTCGAAAGG	4732456N10Rik	0.520976	0.561525	-0.0135388	9.83273	9.92544
4732456N10Rik_CCDS27855.1_ex8_15:101562539-101562561:-_5-3	GCGGCATAGGATACAGAGT	4732456N10Rik	0.269293	0.434107	0.55904	2.65145	1.79968
4732456N10Rik_CCDS27855.1_ex8_15:101562551-101562573:-_5-4	GTCTGGGTGTCAGCGGCAT	4732456N10Rik	0.264295	0.430654	-0.195003	29.1997	33.4256
4732456N10Rik_CCDS27855.1_ex8_15:101562686-101562708:-_5-5	GCGGGAAGAGTTTCGGAGG	4732456N10Rik	0.068091	0.238337	0.518455	20.9425	14.6203
4833403I15Rik_CCDS50284.1_ex0_18:46850433-46850455:+_5-1	AGACTTGGGACCTCCGTCG	4833403I15Rik	0.0189882	0.117173	-2.16429	1	4.48247
4833403I15Rik_CCDS50284.1_ex0_18:46850559-46850581:-_5-2	ATGTTCACGCGACCCGTGA	4833403I15Rik	0.269156	0.434107	-0.291164	13.3608	16.3487
4833403I15Rik_CCDS50284.1_ex1_18:46864673-46864695:+_5-3	GCCCTGGTAGCGACTCAAA	4833403I15Rik	0.464681	0.535878	0.106018	5.87927	5.46272
4833403I15Rik_CCDS50284.1_ex2_18:46866460-46866482:-_5-4	CAAGGTACGTTGGCATGCG	4833403I15Rik	0.254493	0.430654	0.296473	16.2133	13.2015
4833403I15Rik_CCDS50284.1_ex4_18:46876932-46876954:-_5-5	CGATTCGTCAAATATCAAC	4833403I15Rik	0.10062	0.279889	0.779834	8.00613	4.66304
4833420G17Rik_CCDS49373.1_ex2_13:119469574-119469596:+_5-1	ATGTACTCGGAGAGTGGCG	4833420G17Rik	0.188599	0.381851	-0.503137	6.32966	8.97098
4833420G17Rik_CCDS49373.1_ex2_13:119469610-119469632:-_5-2	AAGGTACGCGTGTCCATCC	4833420G17Rik	0.496754	0.548601	-0.0557511	14.6369	15.2136
4833420G17Rik_CCDS49373.1_ex2_13:119469928-119469950:+_5-3	GTGTACGCATGGGTAAAGC	4833420G17Rik	0.40976	0.514062	0.242278	9.48242	8.01653
4833420G17Rik_CCDS49373.1_ex2_13:119469960-119469982:+_5-4	TGCCGCCTGTCCAGAGGCG	4833420G17Rik	0.223977	0.413563	0.310092	18.19	14.6719
4833420G17Rik_CCDS49373.1_ex2_13:119470054-119470076:-_5-5	AGTCACAATGCTACTCGCA	4833420G17Rik	0.266859	0.432631	0.264332	13.8112	11.499
4833423E24Rik_CCDS38168.1_ex11_2:85518461-85518483:-_5-2	CAAGCATCCAGGTGGACGT	4833423E24Rik	0.40215	0.510882	0.137068	12.9855	11.8085
4833423E24Rik_CCDS38168.1_ex11_2:85518596-85518618:-_5-3	GGCAAATGGCAAGGGCAAC	4833423E24Rik	0.170569	0.363718	0.538582	10.183	7.01048
4833423E24Rik_CCDS38168.1_ex11_2:85518619-85518641:-_5-4	GTGGAGGTCTATGAAAAGC	4833423E24Rik	0.393434	0.506739	-0.139319	5.05355	5.5659
4833423E24Rik_CCDS38168.1_ex11_2:85518645-85518667:-_5-5	ATGGGAATCCGACAGCAAA	4833423E24Rik	0.536642	0.571382	-0.0493732	11.9846	12.4019
4833423E24Rik_CCDS38168.1_ex8_2:85500226-85500248:+_5-1	TACAAATTTGTGCATCAGA	4833423E24Rik	0.371458	0.496006	0.257285	10.3832	8.68723
4833424O15Rik_CCDS17796.1_ex0_3:117575798-117575820:+_5-1	CGTTCACTGTGAACGTGCA	4833424O15Rik	0.108482	0.290833	-0.693309	6.32966	10.235
4833424O15Rik_CCDS17796.1_ex0_3:117575841-117575863:-_5-2	CCCGGGTAGGGCTTACGGT	4833424O15Rik	0.377894	0.499134	0.196977	15.4877	13.5111
4833424O15Rik_CCDS17796.1_ex0_3:117575887-117575909:+_5-3	CCGGTGCTCCTCTACTCGC	4833424O15Rik	0.351604	0.485348	0.104512	45.3388	42.1705
4833424O15Rik_CCDS17796.1_ex1_3:117621039-117621061:-_5-4	CAACAATCTCCAGTTAAAA	4833424O15Rik	0.174853	0.368725	0.623736	5.75416	3.73438
4833424O15Rik_CCDS17796.1_ex1_3:117621070-117621092:-_5-5	GACGGTTCGGCGTACCAGT	4833424O15Rik	0.0165661	0.112473	-1.03796	6.52984	13.4079
4833427G06Rik_CCDS40628.1_ex3_9:51100039-51100061:-_5-1	TATCTTTGCTAAAGCCCAA	4833427G06Rik	0.356821	0.488402	0.196904	7.68085	6.70093
4833427G06Rik_CCDS40628.1_ex4_9:51101047-51101069:+_5-2	ACTTACTGTCCTGATCAAA	4833427G06Rik	0.226101	0.415645	-0.391354	10.183	13.3563
4833427G06Rik_CCDS40628.1_ex5_9:51101756-51101778:+_5-3	CTTTAGAGTTCCGCGCCAC	4833427G06Rik	0.20553	0.397176	0.326637	19.241	15.3426
4833427G06Rik_CCDS40628.1_ex5_9:51101815-51101837:+_5-4	GATTCGGTAGTGGGGTACA	4833427G06Rik	0.0714469	0.244192	-0.630939	9.75766	15.1104
4833427G06Rik_CCDS40628.1_ex5_9:51101841-51101863:-_5-5	GCTAAGCAGTTTTGGCTCG	4833427G06Rik	0.224432	0.413639	0.307415	17.039	13.7691
4833439L19Rik_CCDS26529.1_ex1_13:54552981-54553003:+_5-1	TGGTGTGAGGATTCGGAGC	4833439L19Rik	0.403862	0.511559	-0.191715	10.8586	12.4019
4833439L19Rik_CCDS26529.1_ex3_13:54556562-54556584:-_5-2	CATAAGGGCCTTACCACGG	4833439L19Rik	0.466558	0.536822	-0.0990929	13.3608	14.3108
4833439L19Rik_CCDS26529.1_ex4_13:54559187-54559209:+_5-3	GGGCGCTTACTTGTGATCA	4833439L19Rik	0.134127	0.323435	-0.497171	10.8336	15.291
4833439L19Rik_CCDS26529.1_ex5_13:54561692-54561714:-_5-4	AAGTATCAGCATCTTGACA	4833439L19Rik	0.432827	0.523559	-0.240565	5.27874	6.2366
4833439L19Rik_CCDS26529.1_ex5_13:54561748-54561770:-_5-5	CTCCTCCTCCATCGGACAT	4833439L19Rik	0.504488	0.552695	-0.0239525	16.7138	16.9936
4921501E09Rik_CCDS28624.1_ex0_17:33067041-33067063:+_5-1	CCCTTAACTACATGGTACC	4921501E09Rik	0.000204162	0.0076438	1.50102	17.2142	6.08182
4921501E09Rik_CCDS28624.1_ex0_17:33067164-33067186:+_5-2	GGCCATAAGTTTTCAACCC	4921501E09Rik	0.414086	0.515843	0.174394	11.259	9.97703
4921501E09Rik_CCDS28624.1_ex0_17:33067317-33067339:+_5-3	ATCTTGCTGCTAGCCTGAC	4921501E09Rik	0.169335	0.362997	0.347722	20.0166	15.7296
4921501E09Rik_CCDS28624.1_ex0_17:33067596-33067618:-_5-4	AGGGCATGATGCTCTCAAG	4921501E09Rik	0.161179	0.354497	-0.572012	5.25372	7.81016
4921501E09Rik_CCDS28624.1_ex0_17:33067615-33067637:-_5-5	ACTGGCATGGATCGCCTAG	4921501E09Rik	0.504565	0.552728	0.020136	17.9648	17.7158
4921504E06Rik_CCDS15716.1_ex10_2:19516257-19516279:+_5-1	TTGAATAGTTCGCTGATCC	4921504E06Rik	0.242918	0.428348	-0.419909	8.55661	11.4474
4921504E06Rik_CCDS15716.1_ex13_2:19533772-19533794:-_5-2	ATGCCATAGCTATTATCAA	4921504E06Rik	0.632121	0.63387	-0.301195	1	1.23216
4921504E06Rik_CCDS15716.1_ex14_2:19540391-19540413:-_5-3	ATTATTACATCACTTCACG	4921504E06Rik	0.268164	0.433612	-0.429982	5.20368	7.01048
4921504E06Rik_CCDS15716.1_ex15_2:19542389-19542411:-_5-4	AAAGATTTGACTCAATCCA	4921504E06Rik	0.139024	0.329502	-0.651686	5.05355	7.93914
4921504E06Rik_CCDS15716.1_ex16_2:19553760-19553782:+_5-5	GCGGGCAGGTCACCTGGAA	4921504E06Rik	0.367383	0.493649	-0.181963	13.4109	15.2136
4921506M07Rik_CCDS25927.1_ex0_12:57576136-57576158:-_5-1	TCCCGCGGACTGAACCGCT	4921506M07Rik	0.112119	0.2958	0.463081	15.6378	11.3442
4921506M07Rik_CCDS25927.1_ex0_12:57576332-57576354:-_5-2	CACGGGCGATTCTTGCGCG	4921506M07Rik	0.14857	0.340699	-0.350312	18.0649	23.0298
4921506M07Rik_CCDS25927.1_ex0_12:57576352-57576374:+_5-3	GCTCGACGTAACCCACACC	4921506M07Rik	0.000864336	0.0189997	-1.99101	1.92581	7.65538
4921506M07Rik_CCDS25927.1_ex0_12:57576409-57576431:+_5-4	CGATATTGACGACAGCGCG	4921506M07Rik	0.476066	0.540198	0.0752057	15.2124	14.4397
4921506M07Rik_CCDS25927.1_ex0_12:57576461-57576483:-_5-5	CCATCGCACGAGATCGCGC	4921506M07Rik	0.136595	0.32662	-0.267285	32.2523	38.817
4921507P07Rik_CCDS20132.1_ex4_6:50584373-50584395:-_5-1	CCTCCTACGGTGCCAACCA	4921507P07Rik	0.526764	0.564895	-0.0430432	7.856	8.09392
4921507P07Rik_CCDS20132.1_ex4_6:50584404-50584426:+_5-2	TGGGTACGAGCTTTAATGC	4921507P07Rik	0.2935	0.449947	-0.239193	8.0812	9.5385
4921507P07Rik_CCDS20132.1_ex4_6:50584436-50584458:-_5-3	CCGACCTTTACATCGCCTA	4921507P07Rik	0.133568	0.32296	0.46657	12.6102	9.12576
4921507P07Rik_CCDS20132.1_ex7_6:50591650-50591672:+_5-4	CCCGCCAAATCCGTAATGC	4921507P07Rik	0.136101	0.32585	-0.37325	17.8397	23.1072
4921507P07Rik_CCDS20132.1_ex7_6:50591707-50591729:+_5-5	CGGCCTGTGTTCTTCGGGA	4921507P07Rik	0.00562839	0.0590454	-0.805858	15.6378	27.3378
4921509C19Rik_CCDS38271.1_ex1_2:151472614-151472636:+_3-1	GATTCATTGGGCAAACTGA	4921509C19Rik	0.356241	0.488272	0.177555	10.7585	9.5127
4921509C19Rik_CCDS38271.1_ex1_2:151473549-151473571:+_3-2	TTCAATTTCGGGTTGGACA	4921509C19Rik	0.256847	0.430654	0.257585	15.813	13.2273
4921509C19Rik_CCDS38271.1_ex1_2:151473648-151473670:+_3-3	CCCAAATGTTCCTTGGCCA	4921509C19Rik	0.354852	0.487207	-0.158767	18.0649	20.1665
4921511H03Rik_CCDS19078.1_ex0_5:7304896-7304918:-_5-1	GGTGCAGGTAATTGGTACG	4921511H03Rik	0.0127745	0.0965123	0.748704	22.9192	13.6401
4921511H03Rik_CCDS19078.1_ex0_5:7304971-7304993:+_5-2	TTCTAGTGGGCTACATACA	4921511H03Rik	0.306736	0.458281	-0.26336	5.4539	6.54615
4921511H03Rik_CCDS19078.1_ex0_5:7305058-7305080:+_5-3	ATTTAGGCGAATCAGTGAC	4921511H03Rik	0.215286	0.405836	-0.690597	3.1769	5.12737
4921511H03Rik_CCDS19078.1_ex0_5:7305128-7305150:-_5-4	ATCCGGAAGAGTGTGCCAT	4921511H03Rik	0.280355	0.441396	-0.255498	15.3375	18.3092
4921511H03Rik_CCDS19078.1_ex0_5:7305279-7305301:-_5-5	GTCATCTAGGTACAAAACG	4921511H03Rik	0.289264	0.447275	0.256999	8.53159	7.13946
4921517D22Rik_CCDS36688.1_ex1_13:59690481-59690503:+_5-1	CTTCGTAGAACAGCCTGCC	4921517D22Rik	0.495765	0.548184	0.0207157	22.9442	22.6171
4921517D22Rik_CCDS36688.1_ex1_13:59690607-59690629:+_5-2	GAAAGTCGAGTATAGGAGG	4921517D22Rik	0.488808	0.545104	0.0178686	6.67997	6.59775
4921517D22Rik_CCDS36688.1_ex1_13:59690621-59690643:+_5-3	GGAGGAGGGATACCGGCCT	4921517D22Rik	0.0226275	0.129581	-0.717279	11.309	18.5929
4921517D22Rik_CCDS36688.1_ex1_13:59690668-59690690:-_5-4	TACATTGCTCCATTGGATC	4921517D22Rik	0.438864	0.526005	0.642517	2.32616	1.49013
4921517D22Rik_CCDS36688.1_ex1_13:59690754-59690776:+_5-5	CCTCAGTCTGTATGACCAC	4921517D22Rik	0.142935	0.334138	0.376143	21.0175	16.1939
4921524J17Rik_CCDS22498.1_ex1_8:85412164-85412186:+_5-1	TCGTCTGATATGATCTGAA	4921524J17Rik	0.447063	0.529286	0.197602	3.92756	3.42483
4921524J17Rik_CCDS22498.1_ex1_8:85412281-85412303:-_5-2	CATACAGAAAACAAGCACG	4921524J17Rik	0.256594	0.430654	-0.424294	7.78093	10.4414
4921524J17Rik_CCDS22498.1_ex2_8:85426847-85426869:+_5-3	TTTCACAATTACCTGTAGA	4921524J17Rik	0.000281658	0.00946591	2.32828	8.13124	1.61911
4921524J17Rik_CCDS22498.1_ex2_8:85426859-85426881:-_5-4	AGAAATCACCGCCGTCTAC	4921524J17Rik	0.102103	0.282158	0.516673	17.1892	12.0149
4921524J17Rik_CCDS22498.1_ex2_8:85426909-85426931:+_5-5	CTAATAAATATGTAACCAC	4921524J17Rik	0.019463	0.119061	-1.57501	2.07594	6.18501
4921524L21Rik_CCDS50216.1_ex4_18:6626316-6626338:+_5-1	TCTTAGGTGGAGGCAGCAC	4921524L21Rik	0.285626	0.444538	0.221316	16.8639	14.4655
4921524L21Rik_CCDS50216.1_ex4_18:6626340-6626362:+_5-2	GGAGAACCGGGGGCGACAA	4921524L21Rik	0.0373864	0.172225	0.725121	15.9381	9.64168
4921524L21Rik_CCDS50216.1_ex4_18:6626370-6626392:+_5-3	GCTGCATCGTGGAGTCAGA	4921524L21Rik	0.266267	0.432265	-0.271677	12.41	14.9815
4921524L21Rik_CCDS50216.1_ex5_18:6629502-6629524:+_5-4	TCATGTTCAAATCATGGGG	4921524L21Rik	0.438534	0.525844	0.111221	8.8819	8.2229
4921524L21Rik_CCDS50216.1_ex5_18:6629590-6629612:-_5-5	TGGTGCTTCTTGTTAGATA	4921524L21Rik	0.149123	0.341318	0.574167	11.3591	7.62959
4921530D09Rik_CCDS50533.1_ex10_2:25616175-25616197:+_5-4	TCAGGTTGGTTCCGTAAGC	4921530D09Rik	0.011859	0.0925075	0.896781	18.2401	9.79646
4921530D09Rik_CCDS50533.1_ex11_2:25616562-25616584:+_5-5	ATGGACGTATCCTTTCCGC	4921530D09Rik	0.195194	0.387964	0.264874	22.6189	18.8251
4921530D09Rik_CCDS50533.1_ex7_2:25612066-25612088:+_5-1	ACACGGCGGTACTTCTCGC	4921530D09Rik	0.0029339	0.0412924	1.07483	17.8648	8.48086
4921530D09Rik_CCDS50533.1_ex7_2:25612144-25612166:-_5-2	CATCGAGGAGCGACGAGCC	4921530D09Rik	0.213512	0.404391	0.667078	5.02853	3.16687
4921530D09Rik_CCDS50533.1_ex9_2:25615498-25615520:-_5-3	CACCAGATTATCCGCCAAC	4921530D09Rik	0.0365299	0.170261	0.724235	17.1641	10.3898
4921530L21Rik_CCDS27307.1_ex0_14:95881946-95881968:+_5-1	GCGTTGAGAGATGAAAACA	4921530L21Rik	0.394395	0.507054	0.241451	2.67647	2.26401
4921530L21Rik_CCDS27307.1_ex0_14:95882032-95882054:-_5-2	AACTGGTTGTCCATCCGAA	4921530L21Rik	0.470816	0.538325	-0.0892046	12.41	13.2015
4921530L21Rik_CCDS27307.1_ex0_14:95882069-95882091:-_5-3	GTTCTGCTGCCGTAGGATG	4921530L21Rik	0.022359	0.128746	0.698709	23.3946	14.414
4921530L21Rik_CCDS27307.1_ex0_14:95882123-95882145:+_5-4	GAGAACCCAAAACTGTCGG	4921530L21Rik	0.497143	0.548726	-0.0348199	16.6387	17.0452
4921530L21Rik_CCDS27307.1_ex0_14:95882151-95882173:+_5-5	ACAACGCCTTGAGCACAGA	4921530L21Rik	0.350405	0.484552	-0.177457	18.0149	20.3728
4921536K21Rik_CCDS24368.1_ex1_11:3890041-3890063:-_5-1	GCACAGCGTATCTGCGAGA	4921536K21Rik	0.196172	0.388433	0.468365	11.234	8.11971
4921536K21Rik_CCDS24368.1_ex1_11:3890077-3890099:+_5-2	AATAATCACCCGAGATAAA	4921536K21Rik	0.264241	0.430654	-0.600195	1	1.51592
4921536K21Rik_CCDS24368.1_ex2_11:3894834-3894856:-_5-3	CCAAGTTGTTATTCAGGTG	4921536K21Rik	0.00546335	0.058161	0.902363	19.5162	10.4414
4921536K21Rik_CCDS24368.1_ex2_11:3894938-3894960:+_5-4	CGGAAGTTCGAACCAGAAG	4921536K21Rik	0.00160952	0.0285094	1.42616	13.0856	4.86941
4921536K21Rik_CCDS24368.1_ex2_11:3894975-3894997:-_5-5	TGGGCTCGGATTACAGGAA	4921536K21Rik	0.0607539	0.224398	-0.934913	4.15276	7.93914
4921539E11Rik_CCDS51247.1_ex1_4:103235791-103235813:-_5-1	GGGGGAAATGCCCTCCAAA	4921539E11Rik	0.00837498	0.075353	1.25764	9.60753	4.01814
4921539E11Rik_CCDS51247.1_ex2_4:103236951-103236973:+_5-2	GAGTGGTCTGTAGAATGCA	4921539E11Rik	0.0987042	0.277324	0.560555	16.3885	11.1121
4921539E11Rik_CCDS51247.1_ex3_4:103242748-103242770:+_5-3	TAATTTGTGTACCTGTAAA	4921539E11Rik	0.580522	0.605597	-0.112627	1.95083	2.10923
4921539E11Rik_CCDS51247.1_ex3_4:103242785-103242807:-_5-4	GAATCCAATGCTAGTAAGA	4921539E11Rik	0.173887	0.367237	0.755221	4.95346	2.9347
4921539E11Rik_CCDS51247.1_ex3_4:103242856-103242878:+_5-5	GGTGTTTAGACCAAAGCTG	4921539E11Rik	0.0433926	0.186942	0.62295	17.5895	11.4216
4922501C03Rik_CCDS52879.1_ex12_9:87221303-87221325:-_5-1	AGCCTTTGGGATCCTACGG	4922501C03Rik	0.143354	0.334468	-0.225384	42.5363	49.7288
4922501C03Rik_CCDS52879.1_ex13_9:87222123-87222145:+_5-2	ATGGTTTATTCGAAGCTGC	4922501C03Rik	0.11822	0.303771	0.509799	15.0873	10.5961
4922501C03Rik_CCDS52879.1_ex16_9:87231401-87231423:-_5-3	GATCGATTCCTATGGGATC	4922501C03Rik	0.00587618	0.060657	-1.826	2.10096	7.44902
4922501C03Rik_CCDS52879.1_ex17_9:87231978-87232000:-_5-4	ACGTCTCTACCACCGAGTC	4922501C03Rik	0.339948	0.478899	-0.260311	11.259	13.4853
4922501C03Rik_CCDS52879.1_ex24_9:87248389-87248411:+_5-5	CATCTTCGGCTATCCACCA	4922501C03Rik	0.374724	0.497486	0.160438	16.1382	14.4397
4922501L14Rik_CCDS51099.1_ex2_3:154720241-154720263:+_5-1	GAACCTTTGTGTCTACAAA	4922501L14Rik	0.00148448	0.0270595	1.7969	9.03203	2.59936
4922501L14Rik_CCDS51099.1_ex3_3:154727397-154727419:-_5-2	CGCTTGGAGATAAACTGAA	4922501L14Rik	0.239177	0.425669	-0.513244	4.15276	5.92705
4922501L14Rik_CCDS51099.1_ex3_3:154727484-154727506:-_5-3	CGGTGCTTGAACTCGCAGC	4922501L14Rik	0.0732403	0.24736	-0.364474	29.4499	37.9142
4922501L14Rik_CCDS51099.1_ex3_3:154727513-154727535:+_5-4	CCCGCCTAGGAGGCAAGAG	4922501L14Rik	0.306484	0.458281	0.310284	12.435	10.0286
4922501L14Rik_CCDS51099.1_ex4_3:154733605-154733627:+_5-5	AGGACAACGCTGTTAAATA	4922501L14Rik	0.625692	0.63387	-0.107433	3.22695	3.47642
4922502D21Rik_CCDS20583.1_ex2_6:129326655-129326677:-_5-1	TTCATCGACAAAACTGAAG	4922502D21Rik	0.221774	0.411818	0.558181	5.95434	4.04394
4922502D21Rik_CCDS20583.1_ex2_6:129326695-129326717:+_5-2	TGGAGTTCGCAGGTGTCGT	4922502D21Rik	0.0111526	0.0892184	0.559214	38.5328	26.1512
4922502D21Rik_CCDS20583.1_ex2_6:129326776-129326798:-_5-4	AAAGCTGTGCCCTAAAGAC	4922502D21Rik	0.0878167	0.261237	-0.825994	5.27874	9.35792
4922502D21Rik_CCDS20583.1_ex3_6:129330995-129331017:-_5-5	CCCTTTGGACCCTGCTAGG	4922502D21Rik	0.513122	0.55693	-0.0418784	20.8173	21.4305
4922505E12Rik_CCDS15589.1_ex0_1:182748511-182748533:+_5-1	CGGTTACTCCTATTCTGGG	4922505E12Rik	0.314797	0.463499	-0.211099	16.6637	19.2894
4922505E12Rik_CCDS15589.1_ex0_1:182748688-182748710:+_5-2	GCTTCCCGGATGTACTGCA	4922505E12Rik	0.121663	0.307772	0.205274	70.686	61.3112
4922505E12Rik_CCDS15589.1_ex0_1:182748847-182748869:-_5-3	AAGACCCTCGGACCGAGCC	4922505E12Rik	0.0803014	0.250219	1.59778	3.02677	1
4922505E12Rik_CCDS15589.1_ex0_1:182748906-182748928:+_5-4	GGTCATATACCCACGCCGG	4922505E12Rik	0.0743823	0.249187	-0.503726	14.7871	20.9662
4922505E12Rik_CCDS15589.1_ex0_1:182748969-182748991:-_5-5	GGCGCCGAGATCGAGACCG	4922505E12Rik	0.388412	0.503961	-0.17761	13.611	15.3942
4930402F06Rik_CCDS38108.1_ex0_2:35376183-35376205:-_5-1	TAAGATTAAGCAAGAGCGG	4930402F06Rik	0.280126	0.441189	0.402151	6.98023	5.28215
4930402F06Rik_CCDS38108.1_ex0_2:35376219-35376241:-_5-2	GGTAGATCTGAGTCGCCAT	4930402F06Rik	0.254699	0.430654	-0.227933	16.8889	19.7795
4930402F06Rik_CCDS38108.1_ex0_2:35376240-35376262:-_5-3	CGACTTCTCCTATATGCCA	4930402F06Rik	0.416364	0.516719	-0.0957308	26.5724	28.3954
4930402F06Rik_CCDS38108.1_ex1_2:35380398-35380420:+_5-4	CGATCAACCCCACGGTAAC	4930402F06Rik	0.151098	0.343169	0.432741	16.1132	11.9375
4930402F06Rik_CCDS38108.1_ex1_2:35380463-35380485:+_5-5	TTGGTCCACACAATCGGAG	4930402F06Rik	0.0718417	0.244928	0.557788	17.9899	12.2213
4930402H24Rik_CCDS16750.1_ex27_2:130791875-130791897:+_5-1	AGGACCAGTGTTGCGCACC	4930402H24Rik	0.415729	0.516131	-0.0922133	19.7164	21.0177
4930402H24Rik_CCDS16750.1_ex27_2:130791927-130791949:+_5-2	GCGCTCAGGTTGTCCCGTG	4930402H24Rik	0.310707	0.460664	0.155986	19.5662	17.5611
4930402H24Rik_CCDS16750.1_ex29_2:130798239-130798261:-_5-3	GGCGGTGTTTGAGCATCAG	4930402H24Rik	0.265255	0.431448	0.255504	20.3169	17.0194
4930402H24Rik_CCDS16750.1_ex32_2:130812865-130812887:-_5-4	TTCGAGACTGTAGTAGGAT	4930402H24Rik	0.565203	0.592755	-0.0607348	8.13124	8.48086
4930402H24Rik_CCDS16750.1_ex35_2:130822463-130822485:+_5-5	GGTCAGGACACTTTGAACC	4930402H24Rik	0.519641	0.560645	-0.0430373	7.80596	8.04232
4930402K13Rik_CCDS57728.1_ex0_X:9104836-9104858:+_5-1	ACTATGGTAAGGAACGATC	4930402K13Rik	0.121403	0.307746	1.08342	3.97761	1.87707
4930402K13Rik_CCDS57728.1_ex0_X:9105012-9105034:-_5-2	TGGCCGGACTGTCAAAAGC	4930402K13Rik	0.355976	0.488149	-0.181878	16.1633	18.335
4930402K13Rik_CCDS57728.1_ex0_X:9105034-9105056:-_5-3	CCCATATGGTTCTACGTGG	4930402K13Rik	0.000485185	0.0136068	1.08293	24.7958	11.7054
4930402K13Rik_CCDS57728.1_ex0_X:9105161-9105183:+_5-4	CCGGATGCTGGAAAATAAG	4930402K13Rik	0.0897651	0.264119	0.663809	13.4359	8.48086
4930402K13Rik_CCDS57728.1_ex0_X:9105182-9105204:+_5-5	GCCATATTGGGAAGATCAC	4930402K13Rik	0.00701135	0.0675098	1.13726	12.8103	5.82386
4930404A10Rik_CCDS48798.1_ex0_11:54370784-54370806:-_5-1	ACTGAGCTTCAACCTGGCA	4930404A10Rik	0.17676	0.370313	-0.279512	19.4411	23.5974
4930404A10Rik_CCDS48798.1_ex4_11:54390502-54390524:-_5-2	ACTCTGCATTTGAACAACT	4930404A10Rik	0.315171	0.463701	0.230849	7.53071	6.41717
4930404A10Rik_CCDS48798.1_ex4_11:54390563-54390585:+_5-3	ATCGCCAGAACTGTTCAGA	4930404A10Rik	0.275125	0.437868	0.707163	4.32791	2.65095
4930404A10Rik_CCDS48798.1_ex5_11:54394630-54394652:+_5-4	GATTGGGAGCATCCCAAGT	4930404A10Rik	0.00092676	0.0199268	1.43532	13.9363	5.15317
4930404A10Rik_CCDS48798.1_ex5_11:54394721-54394743:-_5-5	CAGAGAGGTTTGCAAACTG	4930404A10Rik	0.306794	0.458281	-0.208178	10.9587	12.6598
4930404N11Rik_CCDS24056.1_ex2_10:81364753-81364775:-_5-1	GCTTTCAGAGTCGCCAGCG	4930404N11Rik	0.127775	0.31552	0.518388	12.9605	9.04837
4930404N11Rik_CCDS24056.1_ex2_10:81364786-81364808:+_5-2	GCGTGTGGGCCTCGCGGTA	4930404N11Rik	0.0205219	0.122683	0.486625	41.8107	29.84
4930404N11Rik_CCDS24056.1_ex2_10:81364885-81364907:+_5-3	CGGCCGCATCCCGTCCCAT	4930404N11Rik	0.147944	0.339695	-0.277703	30.701	37.2177
4930404N11Rik_CCDS24056.1_ex2_10:81364905-81364927:+_5-4	GGCGTGAATTTCCAGCGCA	4930404N11Rik	0.158384	0.351327	-0.488597	8.58163	12.0407
4930404N11Rik_CCDS24056.1_ex2_10:81364933-81364955:+_5-5	TGATGGCCGGCGCCCAACG	4930404N11Rik	0.00317361	0.04339	-0.916622	12.7603	24.0875
4930407I10Rik_CCDS49678.1_ex1_15:82062623-82062645:+_5-1	AGTCCTCTTAACCAACAAT	4930407I10Rik	0.536863	0.571489	-0.152191	2.8266	3.14107
4930407I10Rik_CCDS49678.1_ex1_15:82063076-82063098:+_5-2	ATACCAGCGTGGGTCGACC	4930407I10Rik	0.489926	0.545574	-0.0428696	6.6049	6.80411
4930407I10Rik_CCDS49678.1_ex1_15:82063814-82063836:+_5-3	ACTTGCATAGTACCGAGCC	4930407I10Rik	0.310695	0.460664	-0.205263	12.8604	14.8267
4930407I10Rik_CCDS49678.1_ex1_15:82063981-82064003:+_5-4	AATGATTCACGGACCAAAA	4930407I10Rik	0.439773	0.526123	-0.123029	4.35293	4.74043
4930407I10Rik_CCDS49678.1_ex1_15:82064091-82064113:+_5-5	GTGATATGACCCACGGGAC	4930407I10Rik	0.161326	0.354657	0.496748	8.58163	6.08182
4930412D23Rik_CCDS59775.1_ex0_X:127721577-127721599:+_5-1	GCGCTAACCGAATGTCCAA	4930412D23Rik	0.357403	0.488528	0.24272	12.385	10.4672
4930412D23Rik_CCDS59775.1_ex0_X:127721593-127721615:+_5-2	CAAAGGAACGAGGGCATCA	4930412D23Rik	0.550851	0.581402	0.00241265	15.1874	15.162
4930412D23Rik_CCDS59775.1_ex0_X:127721608-127721630:+_5-3	ATCATGGTAGGAGTAGTGC	4930412D23Rik	0.126716	0.314059	0.501883	15.1874	10.7251
4930412D23Rik_CCDS59775.1_ex0_X:127721677-127721699:-_5-4	GCTTTTATAGGTATGTGGA	4930412D23Rik	0.474261	0.539703	0.0544129	8.80683	8.48086
4930415F15Rik_CCDS48752.1_ex1_11:11495446-11495468:-_5-1	AGGTCACTTACGTATACAG	4930415F15Rik	0.19362	0.386589	-0.512219	7.23045	10.3124
4930415F15Rik_CCDS48752.1_ex2_11:11496426-11496448:+_5-2	ACAATGTGGACAATCCCTA	4930415F15Rik	0.185604	0.379178	-0.509117	7.15539	10.1834
4930415F15Rik_CCDS48752.1_ex2_11:11496441-11496463:-_5-3	CAGACTTGATATCTCCGTA	4930415F15Rik	0.126005	0.313631	-0.715708	4.92844	8.09392
4930415F15Rik_CCDS48752.1_ex2_11:11496466-11496488:-_5-4	AGTTTAGAGTGCCTAGGAC	4930415F15Rik	0.0818878	0.252738	0.695282	10.9337	6.75252
4930415F15Rik_CCDS48752.1_ex2_11:11496487-11496509:+_5-5	TCAGTATACAAACTCAAGC	4930415F15Rik	0.0368218	0.170863	1.12997	6.70499	3.06368
4930415L06Rik_CCDS53129.1_ex0_X:89931415-89931437:-_5-1	ATGATTACCAAATTCAAGT	4930415L06Rik	0.00592309	0.0608475	1.9613	6.20455	1.59331
4930415L06Rik_CCDS53129.1_ex0_X:89931573-89931595:-_5-2	TAACAGTATAGGTGATGAA	4930415L06Rik	0.148691	0.340699	-0.699276	2.77655	4.50826
4930415L06Rik_CCDS53129.1_ex0_X:89931696-89931718:+_5-3	AGAAGATTCGTTTGAAATA	4930415L06Rik	0.264241	0.430654	0.807896	1.75066	1
4930415L06Rik_CCDS53129.1_ex0_X:89932051-89932073:-_5-4	CACTGTTCTTAGAAAATGA	4930415L06Rik	0.00683652	0.0664095	1.18413	11.7094	5.15317
4930415L06Rik_CCDS53129.1_ex0_X:89932479-89932501:-_5-5	GTGGAAAAACGTAGGCACA	4930415L06Rik	0.102665	0.282734	0.615627	13.3108	8.68723
4930415O20Rik_CCDS49722.1_ex1_15:98585299-98585321:-_5-1	CATCTTCTGAGATAATCGG	4930415O20Rik	0.11649	0.301604	0.448928	17.9148	13.1241
4930415O20Rik_CCDS49722.1_ex1_15:98585355-98585377:+_5-2	TACCAGGAAGCTGTGCGAA	4930415O20Rik	0.186359	0.379892	-0.309976	14.1865	17.5869
4930415O20Rik_CCDS49722.1_ex2_15:98588542-98588564:+_5-3	TTCCCAAAAGTCCCCAATC	4930415O20Rik	0.2973	0.452443	-0.420564	2.75153	3.68279
4930415O20Rik_CCDS49722.1_ex2_15:98588603-98588625:+_5-4	TCTGGCGGTCCAACATCCC	4930415O20Rik	0.398158	0.508879	0.0891014	17.6646	16.6066
4930415O20Rik_CCDS49722.1_ex2_15:98588621-98588643:-_5-5	CTTTCTCTGGACGCACGCC	4930415O20Rik	0.0147815	0.105284	0.529223	43.287	29.9948
4930422G04Rik_CCDS51066.1_ex4_3:127562857-127562879:+_5-1	ACCGATGACGAGCCTAAAG	4930422G04Rik	0.10432	0.285124	-0.696381	7.08032	11.4732
4930422G04Rik_CCDS51066.1_ex4_3:127563012-127563034:+_5-2	TTTGGACTCGTCGCTGGAG	4930422G04Rik	0.0559512	0.214302	-0.587197	11.8095	17.7416
4930422G04Rik_CCDS51066.1_ex5_3:127567639-127567661:-_5-3	CACGCGAAACTTCTATGGC	4930422G04Rik	0.13177	0.320967	0.416811	17.8648	13.3821
4930422G04Rik_CCDS51066.1_ex6_3:127573164-127573186:+_5-4	TGAAAGGATCCGCTACTAG	4930422G04Rik	0.161358	0.354657	0.885534	5.27874	2.85732
4930422G04Rik_CCDS51066.1_ex8_3:127583622-127583644:+_5-5	AACGGTTTCCGTTTCTAAG	4930422G04Rik	0.00119432	0.0235911	1.33497	14.8872	5.90125
4930427A07Rik_CCDS49196.1_ex0_12:113156544-113156566:-_5-1	AGGTCGATCGAACTTGGCG	4930427A07Rik	0.530634	0.567228	-0.0611265	5.85425	6.10762
4930427A07Rik_CCDS49196.1_ex0_12:113156563-113156585:-_5-2	CGAATAGCCTCACCGCCTC	4930427A07Rik	0.0182634	0.117173	0.497043	40.5846	28.7566
4930427A07Rik_CCDS49196.1_ex2_12:113157274-113157296:+_5-3	TGTCTTGGCTCCTCGCCCG	4930427A07Rik	0.0120266	0.0931969	-0.620515	20.6172	31.6973
4930427A07Rik_CCDS49196.1_ex3_12:113157625-113157647:-_5-4	CACTAGTCGGAGATCCACG	4930427A07Rik	0.547339	0.5786	-0.0634823	6.98023	7.29424
4930427A07Rik_CCDS49196.1_ex4_12:113158065-113158087:+_5-5	CAGATCCACCTGTACACGC	4930427A07Rik	0.26704	0.432764	-0.184596	28.2989	32.1616
4930428D18Rik_CCDS53116.1_ex0_X:76397259-76397281:-_5-1	TGGTAGACTTAAAGACCAC	4930428D18Rik	0.618805	0.63387	0.0140103	6.4798	6.41717
4930428D18Rik_CCDS53116.1_ex0_X:76397278-76397300:+_5-2	CACAGCATTTGTTGGCATG	4930428D18Rik	0.367829	0.493982	0.094704	28.7243	26.8992
4930428D18Rik_CCDS53116.1_ex0_X:76397378-76397400:-_5-3	CATTCTGATATTCAATGGA	4930428D18Rik	0.475625	0.540043	-0.249923	2.57638	3.06368
4930428D18Rik_CCDS53116.1_ex0_X:76397464-76397486:+_5-4	CCTTTGGAATGTGTGTCAG	4930428D18Rik	0.1659	0.359567	0.313617	22.8191	18.3607
4930428D18Rik_CCDS53116.1_ex0_X:76397503-76397525:-_5-5	AGACCAAATGGATTGTAAG	4930428D18Rik	0.316214	0.464392	0.425437	7.40561	5.51431
4930430A15Rik_CCDS16514.1_ex11_2:111220786-111220808:-_5-1	CTCTTATATGCCATAAGAT	4930430A15Rik	0.521539	0.561899	0.502405	2.47629	1.74809
4930430A15Rik_CCDS16514.1_ex12_2:111225477-111225499:+_5-2	CCTTGAGAGCCAGTAAAAG	4930430A15Rik	0.340711	0.479564	0.305321	7.00526	5.66909
4930430A15Rik_CCDS16514.1_ex13_2:111227933-111227955:-_5-3	CTTAAGTACAGTGCAAACA	4930430A15Rik	0.0253639	0.138325	-0.979703	5.50394	10.8541
4930430A15Rik_CCDS16514.1_ex14_2:111228241-111228263:+_5-4	GTATATATACCTTCATCAG	4930430A15Rik	0.264241	0.430654	-0.868271	1	1.82547
4930430A15Rik_CCDS16514.1_ex15_2:111229241-111229263:+_5-5	ATCACCGTCGCTTGCAGCC	4930430A15Rik	0.469074	0.537642	0.0334897	18.7655	18.335
4930430F08Rik_CCDS24151.1_ex2_10:100577245-100577267:+_5-1	AACCCCGGGATCATCAGGA	4930430F08Rik	0.00295502	0.0414088	-0.888873	14.1365	26.177
4930430F08Rik_CCDS24151.1_ex2_10:100577340-100577362:+_5-2	TCTCTACTGGTACCCAACC	4930430F08Rik	0.197234	0.389704	-0.486128	6.40473	8.97098
4930430F08Rik_CCDS24151.1_ex3_10:100578323-100578345:+_5-3	GTCCGTTTTCATCAGGCAC	4930430F08Rik	0.0432221	0.18647	0.690247	17.1391	10.6219
4930430F08Rik_CCDS24151.1_ex3_10:100578411-100578433:-_5-4	GAGTTTCACTGGAACACTG	4930430F08Rik	0.23035	0.418424	0.417029	12.46	9.33213
4930430F08Rik_CCDS24151.1_ex5_10:100586224-100586246:-_5-5	GCGGTTGCAACAGAAAAAG	4930430F08Rik	0.00214096	0.0340087	-1.53161	3.8525	11.1379
4930432K09Rik_CCDS39134.1_ex2_5:87842667-87842689:+_5-1	GAATATCCCGTTTGGCCTA	4930432K09Rik	0.389187	0.504676	-0.140672	19.4161	21.4047
4930432K09Rik_CCDS39134.1_ex2_5:87842717-87842739:+_5-2	CTCCTTTTAACACTCAACA	4930432K09Rik	0.0154841	0.108313	-1.16072	4.428	9.89964
4930432K09Rik_CCDS39134.1_ex2_5:87842852-87842874:-_5-3	CATTCAATGGAGCATCAGC	4930432K09Rik	0.194186	0.386828	0.429844	12.0847	8.97098
4930432K09Rik_CCDS39134.1_ex2_5:87842963-87842985:-_5-4	CTACGGGCTCAGGTCTAAC	4930432K09Rik	0.374313	0.497302	-0.253877	5.87927	7.01048
4930432K09Rik_CCDS39134.1_ex2_5:87842990-87843012:-_5-5	CACCTTCAGCAGGCATAGC	4930432K09Rik	0.0582448	0.219168	-0.526893	14.3367	20.6566
4930432K21Rik_CCDS52616.1_ex1_8:84159560-84159582:+_5-1	CCTTCTGTAGAGCTAGGCG	4930432K21Rik	0.449309	0.530269	0.0955304	20.417	19.1088
4930432K21Rik_CCDS52616.1_ex1_8:84159590-84159612:+_5-2	CTACACGAAGCTTTCAGGT	4930432K21Rik	0.318879	0.466118	0.188879	23.3696	20.5018
4930432K21Rik_CCDS52616.1_ex2_8:84161246-84161268:-_5-3	CTCTTTGGGTGATCCTGCG	4930432K21Rik	0.0877416	0.261237	-0.363832	23.7699	30.5881
4930432K21Rik_CCDS52616.1_ex4_8:84166683-84166705:-_5-4	CCTTTGAAAGGGTTCCATC	4930432K21Rik	8.32e-05	0.0042007	-2.80951	1	7.01048
4930432K21Rik_CCDS52616.1_ex4_8:84167078-84167100:+_5-5	CTGCAACAGAGTGCTCCAC	4930432K21Rik	0.326479	0.47109	0.18483	12.6602	11.1379
4930432M17Rik_CCDS57255.1_ex1_3:121674030-121674052:-_5-1	TGCGTAGAGCCTTCAAGAG	4930432M17Rik	0.494286	0.547387	0.0516057	11.0088	10.6219
4930432M17Rik_CCDS57255.1_ex1_3:121674076-121674098:-_5-2	CGCTACTCCCTGATGAGCC	4930432M17Rik	0.376169	0.498073	-0.151833	17.3393	19.2636
4930432M17Rik_CCDS57255.1_ex1_3:121674122-121674144:-_5-3	CACCTTGTCCACCCAACAG	4930432M17Rik	0.0429549	0.185873	-0.608089	13.0105	19.8311
4930432M17Rik_CCDS57255.1_ex2_3:121679516-121679538:-_5-4	AAAGCATGACGTGAAATCC	4930432M17Rik	0.0364573	0.170152	-1.32401	1.8007	4.50826
4930432M17Rik_CCDS57255.1_ex2_3:121679545-121679567:-_5-5	TAATCCGTCATTGACAAAG	4930432M17Rik	0.00365985	0.0457028	-2.25285	1	4.76623
4930433I11Rik_CCDS52207.1_ex1_7:40993371-40993393:-_5-2	CCACCAATGTAGTGATATC	4930433I11Rik	0.550883	0.581402	0.0121974	6.0294	5.97864
4930433I11Rik_CCDS52207.1_ex1_7:40993985-40994007:+_5-4	ACCACTTCTTCCCAGCATC	4930433I11Rik	0.45727	0.533371	0.0532334	21.9683	21.1725
4930433I11Rik_CCDS52207.1_ex1_7:40993997-40994019:-_5-5	GCTAGAAGTTCCCAGATGC	4930433I11Rik	0.0987094	0.277324	0.670983	12.435	7.81016
4930435E12Rik_CCDS49850.1_ex3_16:38828193-38828215:-_5-1	CTTAGTGAGGATCTAGAAA	4930435E12Rik	0.264241	0.430654	1.20235	2.30114	1
4930435E12Rik_CCDS49850.1_ex3_16:38828281-38828303:+_5-2	GCTGATAAATAGTCAGTGC	4930435E12Rik	0.376905	0.498569	-0.150359	7.78093	8.63563
4930435E12Rik_CCDS49850.1_ex3_16:38828443-38828465:-_5-3	AGAGCGCAGACTATCTGAG	4930435E12Rik	0.0114095	0.090345	-1.43388	2.97673	8.04232
4930435E12Rik_CCDS49850.1_ex3_16:38828573-38828595:-_5-4	TATCCGGCCAAGCCAATGC	4930435E12Rik	0.415573	0.516131	0.0933001	26.2471	24.6034
4930435E12Rik_CCDS49850.1_ex3_16:38828603-38828625:-_5-5	TTGGATCATCTGAGCCAAC	4930435E12Rik	0.0877029	0.261207	0.593725	15.2124	10.0802
4930444A02Rik_CCDS22204.1_ex0_8:25983320-25983342:+_5-1	CATGACCCTCGTGCCCAGG	4930444A02Rik	0.0930927	0.269499	-0.403319	20.417	27.0024
4930444A02Rik_CCDS22204.1_ex0_8:25983447-25983469:+_5-2	AGGTTGCTCAAGGAACCTA	4930444A02Rik	0.0165897	0.112526	-1.13697	4.47804	9.84805
4930444A02Rik_CCDS22204.1_ex0_8:25983524-25983546:-_5-3	TCTCTACAGAGTGAGCACG	4930444A02Rik	0.555033	0.584521	0.0646485	6.27962	6.00444
4930444A02Rik_CCDS22204.1_ex1_8:25986339-25986361:-_5-4	TCCGGGCTACTTCAGAATG	4930444A02Rik	0.0755797	0.250219	-0.635684	8.23133	12.7888
4930444A02Rik_CCDS22204.1_ex1_8:25986375-25986397:+_5-5	TCCGCGGTGGATCGTCCAG	4930444A02Rik	0.393726	0.506794	-0.0682335	29.1997	30.6139
4930444G20Rik_CCDS48519.1_ex0_10:22067394-22067416:-_5-1	GCTTGGAGCCTGATTTACC	4930444G20Rik	0.40537	0.512326	0.0917379	9.53247	8.94519
4930444G20Rik_CCDS48519.1_ex0_10:22067722-22067744:-_5-3	AAGCGGCCCTATTCCGTCA	4930444G20Rik	0.411686	0.51465	-0.201116	9.95784	11.4474
4930444G20Rik_CCDS48519.1_ex0_10:22067795-22067817:+_5-4	GATCCTTCGGTCAACTCTA	4930444G20Rik	0.0767078	0.250219	-1.12102	2.92669	6.36558
4930444G20Rik_CCDS48519.1_ex0_10:22067880-22067902:+_5-5	TCGGGAGCTCTTGATCTCG	4930444G20Rik	4.91e-05	0.00303924	1.62091	16.5636	5.38533
4930444P10Rik_CCDS56622.1_ex1_1:16068794-16068816:-_5-1	CAGGAGAAGTCAAAAGGTA	4930444P10Rik	0.00365985	0.0457028	-2.25285	1	4.76623
4930444P10Rik_CCDS56622.1_ex2_1:16078557-16078579:+_5-2	GGTCACCTACCTGATGGGA	4930444P10Rik	0.222334	0.412409	-0.250808	21.0676	25.0677
4930444P10Rik_CCDS56622.1_ex2_1:16078590-16078612:-_5-3	CACAAGCGCCTGCTGCACA	4930444P10Rik	0.0243289	0.135106	-0.734331	10.6334	17.6901
4930444P10Rik_CCDS56622.1_ex2_1:16078677-16078699:-_5-4	TTTGGTCTAGAAGAGCCCA	4930444P10Rik	0.265267	0.431448	0.506929	4.90342	3.45063
4930444P10Rik_CCDS56622.1_ex3_1:16080864-16080886:-_5-5	TCTGTTTGAGAGCAGTTGG	4930444P10Rik	0.0126071	0.0956958	-0.966411	8.40648	16.426
4930447A16Rik_CCDS56981.1_ex0_15:37425721-37425743:-_5-1	ATTGCATGAAGGATGCCAC	4930447A16Rik	0.112636	0.29624	0.656387	11.334	7.19105
4930447A16Rik_CCDS56981.1_ex0_15:37425776-37425798:+_5-3	TGGAGCTATAAATTCACCA	4930447A16Rik	0.096273	0.273718	0.547814	14.9622	10.235
4930447A16Rik_CCDS56981.1_ex0_15:37425793-37425815:-_5-4	CCTCTTTGCCAGAAATCCC	4930447A16Rik	0.32133	0.467564	-0.194982	10.158	11.628
4930447A16Rik_CCDS56981.1_ex1_15:37429820-37429842:+_5-5	CTCCATTTTACAAAAAGAA	4930447A16Rik	0.0694234	0.240861	-0.924537	4.27787	8.11971
4930447C04Rik_CCDS25971.1_ex11_12:72909783-72909805:+_5-3	ATTTAGTCAGAGATGGGAA	4930447C04Rik	0.264241	0.430654	0.787127	1.72563	1
4930447C04Rik_CCDS25971.1_ex13_12:72913201-72913223:+_5-4	TTCTTGGTAAGCAGTAAGC	4930447C04Rik	0.207504	0.399076	-0.415169	9.10709	12.1439
4930447C04Rik_CCDS25971.1_ex14_12:72915408-72915430:-_5-5	GCTATAAACAAAGTAGATG	4930447C04Rik	0.264241	0.430654	-0.624538	1	1.54172
4930447C04Rik_CCDS25971.1_ex5_12:72898506-72898528:-_5-2	TCAACCAAATTACAATCAA	4930447C04Rik	0.512847	0.556928	-0.0805713	2.72651	2.88311
4930451C15Rik_CCDS28006.2_ex6_16:17559249-17559271:+_5-1	GATAATGCTGTTCTTACGC	4930451C15Rik	0.424608	0.520117	-0.100757	19.8165	21.2499
4930451C15Rik_CCDS28006.2_ex6_16:17559363-17559385:-_5-2	TTCCAGGGGGTCCGGGCAT	4930451C15Rik	0.0894266	0.263985	0.325533	43.2119	34.4833
4930451C15Rik_CCDS28006.2_ex7_16:17559750-17559772:-_5-3	AATTGAACCTTCGGCACCG	4930451C15Rik	0.268927	0.434076	0.272608	11.7094	9.69327
4930451C15Rik_CCDS28006.2_ex7_16:17559805-17559827:+_5-4	TGGCACAACACTATTGGCC	4930451C15Rik	0.501908	0.550841	-0.0233252	12.6852	12.892
4930451C15Rik_CCDS28006.2_ex7_16:17559864-17559886:-_5-5	TGCTAGGCACCCATGGGCT	4930451C15Rik	0.00974366	0.0826348	-0.732159	15.5878	25.8932
4930451I11Rik_CCDS52402.1_ex2_7:126830871-126830893:-_5-1	CTATAACGTTCGTTAAGAC	4930451I11Rik	0.0337325	0.162547	1.36669	6.10447	2.36719
4930451I11Rik_CCDS52402.1_ex2_7:126830891-126830913:+_5-2	GGCTTCTCTCCAATAAACC	4930451I11Rik	0.203064	0.39516	0.40993	14.3867	10.8283
4930451I11Rik_CCDS52402.1_ex2_7:126830905-126830927:+_5-3	AAACCGGGCCACAGCAAGA	4930451I11Rik	0.193514	0.386567	-0.719232	3.0518	5.02419
4930451I11Rik_CCDS52402.1_ex2_7:126830925-126830947:+_5-4	GGCTAGCTCGGTCTGAGTC	4930451I11Rik	0.125473	0.312885	-0.49328	11.5592	16.2713
4930451I11Rik_CCDS52402.1_ex2_7:126830966-126830988:+_5-5	TTTACAACTTGCTGGGGTC	4930451I11Rik	0.502545	0.551074	0.0764492	14.4368	13.6917
4930452B06Rik_CCDS26814.1_ex10_14:8558106-8558128:+_5-3	GATGATTCCATCCAACGAC	4930452B06Rik	0.522921	0.562575	0.0553305	10.2331	9.84805
4930452B06Rik_CCDS26814.1_ex12_14:8644453-8644475:-_5-4	TCTAGTTGGACTGATCCAG	4930452B06Rik	0.114591	0.298797	-0.624474	6.40473	9.87385
4930452B06Rik_CCDS26814.1_ex13_14:8659395-8659417:+_5-5	CTTATTCTCCTTCGGTAAC	4930452B06Rik	0.454728	0.532435	0.272974	5.35381	4.43088
4930452B06Rik_CCDS26814.1_ex8_14:8518642-8518664:-_5-1	TGGCAGACGGAATAACCTA	4930452B06Rik	0.00437631	0.0508619	1.22	12.7853	5.48851
4930452B06Rik_CCDS26814.1_ex8_14:8518686-8518708:-_5-2	CACATCGCCTTCGGATCCA	4930452B06Rik	0.00394128	0.0479275	-0.714831	21.2928	34.9476
4930453N24Rik_CCDS28265.1_ex0_16:64766875-64766897:+_5-1	CTTGAGGTGGGCCCAAAAA	4930453N24Rik	0.386842	0.503587	0.108769	16.7388	15.5232
4930453N24Rik_CCDS28265.1_ex1_16:64768917-64768939:+_5-2	ATATACCTGCTTAAAGAGC	4930453N24Rik	0.549741	0.580547	0.169484	4.40298	3.91496
4930453N24Rik_CCDS28265.1_ex1_16:64768940-64768962:+_5-3	TGTCCTCCGTCTTTGTAAC	4930453N24Rik	0.452207	0.531567	0.0312163	6.50482	6.36558
4930453N24Rik_CCDS28265.1_ex1_16:64769076-64769098:+_5-4	CTTAAATATGACTTCTCGG	4930453N24Rik	0.446095	0.529063	-0.108803	10.2331	11.0347
4930453N24Rik_CCDS28265.1_ex2_16:64770730-64770752:+_5-5	GCCTACCTTGGCGGTCCAC	4930453N24Rik	0.179094	0.372676	0.256365	26.5223	22.2044
4930468A15Rik_CCDS53117.1_ex0_X:76582995-76583017:+_5-1	GATAAGTAATTGTACAAGA	4930468A15Rik	0.264241	0.430654	-1.04099	1	2.05764
4930468A15Rik_CCDS53117.1_ex0_X:76583091-76583113:-_5-2	ATTGAACTCAGGGAGACTC	4930468A15Rik	0.524263	0.563447	-0.0116746	42.0609	42.4027
4930468A15Rik_CCDS53117.1_ex0_X:76583182-76583204:+_5-3	GGGCAACTCGAATATCCAG	4930468A15Rik	0.059648	0.222251	0.969203	6.70499	3.42483
4930468A15Rik_CCDS53117.1_ex0_X:76583232-76583254:+_5-4	TAACACATCCGGTTAAAGG	4930468A15Rik	0.0960828	0.273522	0.551992	12.5851	8.58404
4930468A15Rik_CCDS53117.1_ex0_X:76583295-76583317:+_5-5	ACTAAGGTCATGCCATGCT	4930468A15Rik	0.00282544	0.0403513	-1.37378	5.20368	13.4853
4930474N05Rik_CCDS49448.1_ex0_14:36095086-36095108:+_5-1	CTCTTGCCTTCAACGCCTG	4930474N05Rik	0.0786568	0.250219	0.303215	48.6917	39.4619
4930474N05Rik_CCDS49448.1_ex0_14:36095137-36095159:-_5-2	TTCTGGTCTTGCTTACCCT	4930474N05Rik	0.0672849	0.23723	0.632523	14.9872	9.66748
4930474N05Rik_CCDS49448.1_ex1_14:36095357-36095379:+_5-3	GCTGAAATGGTTGTTAAGT	4930474N05Rik	0.361138	0.490612	0.389744	6.37971	4.86941
4930474N05Rik_CCDS49448.1_ex1_14:36095456-36095478:+_5-4	GTTACCCCCCTACAGGTAC	4930474N05Rik	0.0164087	0.111867	-0.798215	10.158	17.6643
4930474N05Rik_CCDS49448.1_ex2_14:36096412-36096434:-_5-5	TCTATGCTCAACAGAATGA	4930474N05Rik	0.632121	0.63387	0	1	1
4930480E11Rik_CCDS53120.1_ex0_X:78369959-78369981:+_5-1	CAATTTCAATGGGTCAGCA	4930480E11Rik	0.004395	0.0510112	-0.804094	16.8389	29.4015
4930480E11Rik_CCDS53120.1_ex0_X:78370074-78370096:+_5-3	TGATCAGAATCTGAAAAAG	4930480E11Rik	0.436626	0.525041	-0.164888	3.37708	3.78597
4930480E11Rik_CCDS53120.1_ex0_X:78370159-78370181:-_5-4	GGAATTTTCAGGGGGATGC	4930480E11Rik	0.000122599	0.00539615	1.22681	24.9209	10.6477
4930480E11Rik_CCDS53120.1_ex0_X:78370241-78370263:-_5-5	GTGTGCATCTATAATAAAG	4930480E11Rik	0.481219	0.542372	0.507151	2.30114	1.61911
4930486L24Rik_CCDS26583.1_ex3_13:60853123-60853145:-_5-1	AATGGCGGCCTCGCAACTG	4930486L24Rik	0.0206439	0.122861	-0.863237	7.45565	13.5627
4930486L24Rik_CCDS26583.1_ex3_13:60853275-60853297:-_5-2	GTGCAACTGGATCCCTAGA	4930486L24Rik	0.29533	0.451311	-0.356935	6.27962	8.04232
4930486L24Rik_CCDS26583.1_ex3_13:60853292-60853314:+_5-3	GCACTAAAAGCCCAACTAG	4930486L24Rik	0.102407	0.282446	-1.15609	2.45127	5.46272
4930486L24Rik_CCDS26583.1_ex4_13:60853606-60853628:-_5-4	TCGAAGGCAGAAGATCAAG	4930486L24Rik	0.47817	0.541174	-0.154599	6.52984	7.26844
4930486L24Rik_CCDS26583.1_ex4_13:60853631-60853653:-_5-5	AATTCGTGAAAATGATGAC	4930486L24Rik	0.264241	0.430654	-1.07672	1	2.10923
4930502E18Rik_CCDS30136.1_ex1_X:53727384-53727406:+_5-1	ACAAACAGGGAGTTGTGGC	4930502E18Rik	0.113012	0.296882	-0.460138	11.3591	15.6264
4930502E18Rik_CCDS30136.1_ex1_X:53727448-53727470:-_5-2	CCAGTCTCAACGTCAGCAC	4930502E18Rik	0.133759	0.3231	0.437271	14.662	10.8283
4930502E18Rik_CCDS30136.1_ex1_X:53727524-53727546:-_5-3	GACTGCGTTCAATCCACGA	4930502E18Rik	0.0126195	0.0957607	-0.80623	12.8604	22.4881
4930502E18Rik_CCDS30136.1_ex2_X:53733805-53733827:+_5-4	ATGCTGACTACAATGGTCA	4930502E18Rik	0.00670069	0.0655086	-1.24157	4.50307	10.6477
4930502E18Rik_CCDS30136.1_ex3_X:53736279-53736301:+_5-5	AAACCTTATAATGGTGACC	4930502E18Rik	0.264241	0.430654	-1.22737	1	2.3414
4930503B20Rik_CCDS38667.1_ex1_3:146650648-146650670:+_5-1	GGGTCATCAGAATAAGACC	4930503B20Rik	0.00202907	0.0329585	-2.31366	1.27524	6.33978
4930503B20Rik_CCDS38667.1_ex1_3:146650738-146650760:+_5-2	GCTCTTCTGGACCCAGTAA	4930503B20Rik	0.00365985	0.0457028	-2.42211	1	5.35953
4930503B20Rik_CCDS38667.1_ex1_3:146650855-146650877:-_5-3	CAGCAGAGATGAAACCGAT	4930503B20Rik	0.0338509	0.162796	1.04084	8.95696	4.35349
4930503B20Rik_CCDS38667.1_ex1_3:146650928-146650950:-_5-4	CCCGATGGAACCGAAACAA	4930503B20Rik	0.203844	0.395664	0.39503	13.0856	9.95123
4930503B20Rik_CCDS38667.1_ex1_3:146650942-146650964:-_5-5	GGATTACGACAGGTCCCGA	4930503B20Rik	0.157911	0.350911	-0.515693	9.43238	13.4853
4930503E14Rik_CCDS36890.1_ex1_14:44169258-44169280:+_4-1	TCATGTTGTGATTTGATGA	4930503E14Rik	0.118665	0.30438	0.624931	11.2089	7.26844
4930503E14Rik_CCDS36890.1_ex2_14:44170335-44170357:-_4-3	CAGAAAGATAAATGCTGAG	4930503E14Rik	0.632121	0.63387	-0.524598	1	1.43853
4930503E14Rik_CCDS36890.1_ex3_14:44171178-44171200:-_4-4	AATGAAATCATTCTGGGAA	4930503E14Rik	0.000451933	0.0130323	-2.39789	1.32528	6.98469
4930503L19Rik_CCDS29333.1_ex5_18:70468019-70468041:+_5-1	AAATTGGATACTTAACGTC	4930503L19Rik	0.680778	0.681216	-0.0713439	2.35118	2.47038
4930503L19Rik_CCDS29333.1_ex5_18:70468090-70468112:-_5-2	GCTCGAGAACTATCCAAGA	4930503L19Rik	0.329431	0.47299	0.387772	4.95346	3.78597
4930503L19Rik_CCDS29333.1_ex5_18:70468352-70468374:+_5-3	TGTTTGGTCGGTGATCAGG	4930503L19Rik	0.34641	0.482374	0.138973	21.8933	19.8827
4930503L19Rik_CCDS29333.1_ex6_18:70469453-70469475:+_5-4	TCGGGTATATGTACGTAGC	4930503L19Rik	0.53191	0.568093	0.133066	3.07682	2.80572
4930503L19Rik_CCDS29333.1_ex6_18:70469493-70469515:-_5-5	TGAACACTGACGGTGAGAT	4930503L19Rik	0.000902892	0.0195695	-1.19543	8.23133	18.8509
4930504O13Rik_CCDS24731.1_ex0_11:58446385-58446407:+_5-1	GGGACGTTGTTGACACCTG	4930504O13Rik	0.0566474	0.215803	0.436654	30.751	22.7203
4930504O13Rik_CCDS24731.1_ex1_11:58447316-58447338:+_5-2	GCACCTGTGTTTATGATGC	4930504O13Rik	0.279873	0.441038	0.235111	13.6861	11.628
4930504O13Rik_CCDS24731.1_ex1_11:58447365-58447387:+_5-3	TGGAACACCACTTGAGCTC	4930504O13Rik	0.39621	0.507994	0.0980882	20.8674	19.4958
4930504O13Rik_CCDS24731.1_ex1_11:58447400-58447422:-_5-4	CACATGCTTCACCGTGAAG	4930504O13Rik	0.489836	0.545574	0.0606568	18.3152	17.5611
4930504O13Rik_CCDS24731.1_ex1_11:58447465-58447487:-_5-5	ATTACGATGAACGAGATAG	4930504O13Rik	0.0189882	0.117173	1.91741	3.77743	1
4930505A04Rik_CCDS48764.1_ex1_11:30427152-30427174:-_5-1	TTAGTTCCACTTACCAGTC	4930505A04Rik	0.00784006	0.0724191	-1.30415	3.97761	9.82225
4930505A04Rik_CCDS48764.1_ex2_11:30446268-30446290:+_5-2	GCAAAACCAATGGGCATGC	4930505A04Rik	0.302842	0.456076	0.242286	10.7335	9.07417
4930505A04Rik_CCDS48764.1_ex2_11:30446313-30446335:+_5-3	CACTTTTGGTGTCATAAGA	4930505A04Rik	0.512999	0.556928	0.204436	4.30289	3.73438
4930505A04Rik_CCDS48764.1_ex3_11:30454670-30454692:-_5-4	AATAAAGGGCCAGAAAAGC	4930505A04Rik	0.0945316	0.27141	-1.02543	3.10184	6.31399
4930506M07Rik_CCDS50480.1_ex10_19:59038308-59038330:+_5-3	TCTCCTCTGTAATTACGTC	4930506M07Rik	0.112573	0.296213	0.738708	6.70499	4.01814
4930506M07Rik_CCDS50480.1_ex10_19:59038333-59038355:-_5-4	ATGCTATACATGGCCAAAC	4930506M07Rik	0.0630587	0.228828	0.927142	9.35731	4.921
4930506M07Rik_CCDS50480.1_ex11_19:59041933-59041955:-_5-5	TCACATATGGTTATAGAGG	4930506M07Rik	0.230006	0.418296	-0.370884	7.55574	9.77066
4930506M07Rik_CCDS50480.1_ex7_19:59028224-59028246:+_5-1	TACTCTTCAACAGCCAACA	4930506M07Rik	0.152764	0.345046	-0.722168	3.57726	5.90125
4930506M07Rik_CCDS50480.1_ex9_19:59035082-59035104:-_5-2	AAGGTGTTAGCCATCGAGC	4930506M07Rik	0.455595	0.532854	-0.0461375	13.2607	13.6917
4930511M11Rik_CCDS19067.1_ex1_5:3662012-3662034:+_5-1	AAAACACGTCTATTCGTAA	4930511M11Rik	0.269481	0.434107	0.626472	4.05267	2.62515
4930511M11Rik_CCDS19067.1_ex3_5:3665276-3665298:+_5-2	TAGCGAACCTGTAAGAAAG	4930511M11Rik	0.450091	0.530409	-0.294888	2.47629	3.03789
4930511M11Rik_CCDS19067.1_ex3_5:3665312-3665334:-_5-3	AGGAGTGCATACAGGAACC	4930511M11Rik	0.14958	0.341547	0.713938	5.82923	3.55381
4930511M11Rik_CCDS19067.1_ex4_5:3666816-3666838:+_5-4	TTTGTACTCGCTTGCTGCA	4930511M11Rik	0.429507	0.522359	0.0570619	27.8235	26.7445
4930511M11Rik_CCDS19067.1_ex4_5:3666843-3666865:-_5-5	GTTTGCGGGCACTTGGCGC	4930511M11Rik	0.333343	0.475233	0.161177	20.9925	18.7735
4930513O06Rik_CCDS57775.1_ex0_X:139090820-139090842:-_5-1	ATCAAGTTTTCTGGGACTA	4930513O06Rik	0.092069	0.267538	0.67343	8.50657	5.33374
4930513O06Rik_CCDS57775.1_ex0_X:139090843-139090865:-_5-2	CTTCTGTTTCCAATGCAAA	4930513O06Rik	0.00631473	0.0631543	-1.48045	3.25197	9.07417
4930513O06Rik_CCDS57775.1_ex0_X:139090870-139090892:+_5-3	ACCTCACAGTGATAGAGGA	4930513O06Rik	0.0189698	0.117173	1.03335	10.7585	5.25635
4930513O06Rik_CCDS57775.1_ex0_X:139090911-139090933:-_5-4	ATACTCTATTTGCTCAGTG	4930513O06Rik	0.156911	0.349547	0.355607	21.0175	16.426
4930513O06Rik_CCDS57775.1_ex0_X:139090938-139090960:+_5-5	GAATACCTTGTAGAGTCCA	4930513O06Rik	0.34371	0.481395	0.237213	13.3108	11.2926
4930519G04Rik_CCDS19574.1_ex3_5:114870707-114870729:+_5-1	CCTCCTACCAGATTCCAAC	4930519G04Rik	0.356241	0.488272	0.262259	11.4091	9.5127
4930519G04Rik_CCDS19574.1_ex4_5:114872522-114872544:-_5-2	TGTCCAAGGATTCCACCTG	4930519G04Rik	0.0167449	0.113006	-0.799605	10.9337	19.0314
4930519G04Rik_CCDS19574.1_ex5_5:114874277-114874299:+_5-3	AGTCATCCTGGAGAGCTCA	4930519G04Rik	0.266102	0.432066	0.312981	12.0096	9.66748
4930519G04Rik_CCDS19574.1_ex5_5:114874308-114874330:-_5-4	TTCTGATCTTCTATGACAA	4930519G04Rik	0.423386	0.519673	0.21529	7.18041	6.18501
4930519G04Rik_CCDS19574.1_ex6_5:114877965-114877987:+_5-5	TTGGATTGTCCAGAGGCAG	4930519G04Rik	0.000708949	0.0167194	-1.30046	6.80508	16.7614
4930522H14Rik_CCDS18465.1_ex0_4:109505659-109505681:-_5-1	CGTAGAAGAAGCCGAAGAC	4930522H14Rik	0.264241	0.430654	-1.11158	1	2.16082
4930522H14Rik_CCDS18465.1_ex0_4:109505741-109505763:-_5-2	AGGTGACCTCAGTAGCAAA	4930522H14Rik	0.483173	0.542991	0.051154	9.88277	9.5385
4930522H14Rik_CCDS18465.1_ex2_4:109524324-109524346:+_5-3	TGATTGTAAATAGCCAGCA	4930522H14Rik	0.203653	0.395606	-0.655142	3.92756	6.18501
4930522H14Rik_CCDS18465.1_ex2_4:109524338-109524360:-_5-4	TTTCCCGGAACTTCCATGC	4930522H14Rik	0.00413345	0.0491579	0.805747	29.2998	16.7614
4930522H14Rik_CCDS18465.1_ex3_4:109527931-109527953:-_5-5	TGATTTGCAAACGAAGGTA	4930522H14Rik	0.0960224	0.273467	-1.08717	2.40123	5.10157
4930523C07Rik_CCDS48410.1_ex0_1:160075257-160075279:-_5-1	CACCACCAGGGGCAACCCC	4930523C07Rik	0.387985	0.503957	-0.159114	11.6843	13.0468
4930523C07Rik_CCDS48410.1_ex0_1:160075286-160075308:-_5-2	TGGCAACAGATGAAGAAGA	4930523C07Rik	0.0803014	0.250219	-1.43432	1	2.70254
4930523C07Rik_CCDS48410.1_ex0_1:160075305-160075327:-_5-3	TGGCCGGCTACAGCAGCAA	4930523C07Rik	0.0352424	0.166864	0.626518	22.0935	14.3108
4930523C07Rik_CCDS48410.1_ex0_1:160075324-160075346:-_5-4	GCTGTTGGTTGCTCTTAGG	4930523C07Rik	0.35708	0.488528	-0.176928	18.09	20.4502
4930523C07Rik_CCDS48410.1_ex0_1:160075345-160075367:-_5-5	TTTTCTTCTTGTTCTGGTC	4930523C07Rik	0.115226	0.299741	-0.435167	13.9613	18.8767
4930524B15Rik_CCDS24515.1_ex0_11:31965761-31965783:-_5-1	GCCTCGATGGCCGAAACCT	4930524B15Rik	0.313365	0.462447	-0.346867	6.40473	8.14551
4930524B15Rik_CCDS24515.1_ex0_11:31965803-31965825:+_5-2	GCCTCAAAGCAAGCAGCGG	4930524B15Rik	0.367029	0.493455	-0.0832319	42.4363	44.9565
4930524B15Rik_CCDS24515.1_ex0_11:31965862-31965884:-_5-3	GTGTCAGTGACCCCGGCCT	4930524B15Rik	0.296607	0.452117	0.132884	32.5776	29.711
[truncated: 88,232 more rows]
